# Supplementary material for: Distinct Genetically Determined Origins of Myd88 / BCL2 -Driven Aggressive Lymphoma Rationalize Targeted Therapeutic Intervention Strategies
Source: Oxford University Press journal article supplement (doi:10.1158/2643-3230.bcd-22-0007), 2022-11-07
Supplement: bcd-22-0007_table_s2_suppst2.xlsx [file bcd-22-0007_table_s2_suppst2.xlsx]

## Sheet: Samples
Genotype	Sample ID	SBCR	LBCR
MBC	MBC_1	x
	MBC_2	x	x
	MBC_3	x
	MBC_4	x
	MBC_5	x
	MBC_6	x
	MBC_7	x	x
	MBC_8	x
	MBC_9	x	x
	MBC_10	x
	MBC_11	x
	MBC_12	x
	MBC_13	x
	MBC_14	x
	MBC_15	x
	MBC_19	x	x
SMBC	SMBC_1	x
	SMBC_3	x
	SMBC_4	x	x
	SMBC_5	x	x
	SMBC_8	x	x
	SMBC_9	x
PPMBC	PPMBC_1	x	x
	PPMBC_2	x
	PPMBC_3	x	x
	PPMBC_4	x	x
	PPMBC_5	x
	PPMBC_6	x
	PPMBC_8	x
	PPMBC_12	x
	PPMBC_14	x
	PPMBC_19	x	x
	PPMBC_20	x	x

## Sheet: Clones-characteristics
Genotype	Sample	Fraction of Reads	V allele	V gene	V family	Germline identity of dominant sequence	Dominant Sequence	Gini coefficient	Individual subclone sizes
MBC	MBC_1	0.75369	IGHV1-54*01	IGHV1-54	IGHV1	1	GAGGACTCTGCGGTCTATTTCTGTGCAAGAGAGATTACTACGGTCTGGTACTTCGATGTCTGGGGCACAGGGGGTCTCTA	0.961821	4138,83,15,13,11,8,8,7,6,5,5,5,4,4,4,3,3,3,3,2,2,2,2,2,2,2,2,2,2,2,2,2,2,2,2,2,1,1,1,1,1,1,1,1,1,1,1,1,1,1,1,1,1,1,1,1,1,1,1,1,1,1,1,1,1
	MBC_2	0.750736	IGHV8-11*01	IGHV8-11	IGHV8	0.983607	ACTGCCACATACTACTGTGCTCGACATTATGATTACGACGGAGGAGATGCTATGGACTACTGGGGCCAAGG	0.950394	3557,271,226,14,13,11,9,8,7,6,6,6,5,5,5,5,5,5,5,5,4,4,4,4,4,4,4,3,3,3,3,3,3,3,3,3,3,2,2,2,2,2,2,2,2,2,2,2,2,2,2,2,2,2,2,1,1,1,1,1,1,1,1,1,1,1,1,1,1,1,1,1,1,1,1,1,1,1,1,1,1,1,1,1,1,1,1,1,1,1,1,1,1,1,1,1,1,1,1,1,1,1,1,1,1,1,1,1,1,1,1,1,1,1,1,1,1,1,1,1,1
	MBC_3	0.341739	IGHV1-64*01	IGHV1-64	IGHV1	1	CATGCAACTCAGCAGCCTGACATCTGAGGACTCTGCGGTCTATTACTGTGGTAACTGACTACTGGGGCCAAGGCGTGTATC	0.920812	2383,1229,257,148,130,125,80,59,42,23,23,22,21,17,14,14,14,14,12,9,9,9,9,9,8,8,8,8,7,6,6,5,5,5,5,5,4,4,4,4,4,3,3,3,3,3,3,3,3,3,3,3,3,3,3,3,3,3,3,2,2,2,2,2,2,2,2,2,2,2,2,2,2,2,2,2,2,2,2,2,2,2,2,2,2,2,2,2,2,2,2,2,2,2,2,2,2,2,2,2,1,1,1,1,1,1,1,1,1,1,1,1,1,1,1,1,1,1,1,1,1,1,1,1,1,1,1,1,1,1,1,1,1,1,1,1,1,1,1,1,1,1,1,1,1,1,1,1,1,1,1,1,1,1,1,1,1,1,1,1,1,1,1,1,1,1,1,1,1,1,1,1,1,1,1,1,1,1,1,1,1,1,1,1,1,1,…
	MBC_4	0.629787	IGHV1-49*01	IGHV1-49	IGHV1	1	GGACTCTGCGGTCTATTACTGTGCAAGCGGACAGCTCAGGCTACGTTACTATGCTATGGACTACTGGGGTCAAGGGGTCTA	0.961816	3620,2305,18,12,6,6,5,4,4,4,3,3,3,3,2,2,2,2,2,2,2,2,2,2,2,2,1,1,1,1,1,1,1,1,1,1,1,1,1,1,1,1,1,1,1,1,1,1,1,1,1,1,1,1,1,1,1,1,1,1,1,1,1,1,1,1,1,1,1,1,1,1,1,1
	MBC_5	0.571472	IGHV1-54*01	IGHV1-54	IGHV1	1	GAGGACTCTGCGGTCTATTTCTGTGCAAGACGCTGGGACGGGTACTATGCTATGGACTACTGGGGTCAAGGGCGCGATCG	1	5625
	MBC_6	0.713247	IGHV7-2*01	IGHV7-2	IGHV7	1	GACAGTGCCACTTATTACTGTGCAAGACTTTATTACTACGGTAGTAGCTACTTTGACTACTGGGGCCAAGGGGCGCGATCG	1	12168
	MBC_7	0.88306	IGHV1S126*01	IGHV1S126	IGHV1	0.983871	GTCTATTACTGTGCAAGAGGGGATTACTACGGTAGTACCTACGATGCTATGGACTACTGGGGTCAAGGGCGTTATCGATC	0.973574	11496,6684,486,438,358,327,116,54,47,26,24,21,15,11,9,9,8,8,8,8,7,7,6,6,6,5,5,5,5,5,5,4,4,4,4,4,4,4,4,4,4,4,3,3,3,3,3,3,3,3,3,3,3,2,2,2,2,2,2,2,2,2,2,2,2,2,2,2,2,2,2,2,2,2,2,1,1,1,1,1,1,1,1,1,1,1,1,1,1,1,1,1,1,1,1,1,1,1,1,1,1,1,1,1,1,1,1,1,1,1,1,1,1,1,1,1,1,1,1,1,1,1,1,1,1,1,1,1,1,1,1,1,1,1,1,1,1,1,1,1,1,1,1,1,1,1,1,1,1,1,1,1,1,1,1,1,1,1
	MBC_8	0.639222	IGHV10-1*01	IGHV10-1	IGHV10	1	GACACAGCCATGTATTACTGTGTGAGATGCTACGGTAGTAGCTATGCTATGGACTACTGGGGTCAAGGTCATGAATCGA	0.979258	13129,339,15,14,11,8,7,6,6,6,5,5,5,5,4,4,4,4,3,3,3,3,3,3,3,3,3,2,2,2,2,2,2,2,2,2,2,2,2,2,2,1,1,1,1,1,1,1,1,1,1,1,1,1,1,1,1,1,1,1,1,1,1,1,1,1,1,1,1,1,1,1,1,1,1,1,1,1,1,1,1,1,1,1,1,1,1,1,1
	MBC_9	0.733007	IGHV1S136*01	IGHV1S136	IGHV1	0.965517	ATTACTGTGCTCGAGGCCCCTCTTCTTACTACGGTGATTCCTACTATGTTATGGACTACTGGGGTCAAGGATCGATCGT	0.970509	14473,11667,6246,726,662,656,539,396,354,287,194,165,123,99,98,78,75,74,71,68,62,53,51,45,36,36,32,27,26,25,23,22,22,22,21,20,19,16,15,13,12,11,11,11,11,10,10,10,10,9,9,9,9,9,9,9,9,9,8,8,8,8,8,8,8,8,7,7,7,7,7,7,7,7,7,7,7,6,6,6,6,6,6,6,6,6,6,6,6,6,6,6,5,5,5,5,5,5,5,5,5,5,5,5,5,5,5,5,5,4,4,4,4,4,4,4,4,4,4,4,4,4,4,4,4,4,4,4,4,4,4,4,4,4,4,4,4,4,4,4,4,4,4,4,4,4,3,3,3,3,3,3,3,3,3,3,3,3,3,3,3,3,3,3,3,3,…
	MBC_10	0.344563	IGHV1-15*01	IGHV1-15	IGHV1	0.968254	ACTCTGCCGTCTATTATTGTACAAGGGTCTATTATGGTAGTTCCTGGTTTGCTTACTGGGGCCAAGGGCGCGATAGG	1	24249
	MBC_11	0.851233	IGHV1-76*01	IGHV1-76	IGHV1	1	ACATCTGAGGACTCTGCTGTCTATTTCTGTGCAAGAGAGGAGGGTAAGGGGGGCTACTTTGACTACTGGGGCCAAGG	0.978579	40138,23984,1079,588,113,98,89,67,51,51,47,45,42,40,40,38,36,34,34,33,30,30,28,28,27,26,25,25,25,25,24,24,23,23,22,22,20,20,20,20,20,20,20,20,19,19,19,19,19,18,17,17,17,17,16,16,16,16,16,15,15,15,15,15,15,14,14,14,14,14,14,14,14,14,13,13,13,13,13,13,13,13,13,12,12,12,12,12,12,12,12,12,11,11,11,11,11,11,11,11,11,10,10,10,10,10,10,10,10,10,10,10,10,10,10,10,9,9,9,9,9,9,9,9,9,8,8,8,8,8,8,8,8,8,8,8,8…
	MBC_12	0.076649	IGHV1-63*01	IGHV1-63	IGHV1	1	GAGGACTCTGCCATCTATTACTGTGCAAGAAAGGCCTATCTCTTCGGGGCTATGGACTACTGGGGTCAAGGAAGG	1	9174
	MBC_13	0.971121	IGHV6-6*01	IGHV6-6	IGHV6	1	GGGCTGAAGAGCATTTATTACTGTACCCCCCTTACTACGGTAGTAGCTGAGGGGTACTTCGATGTCTGGGGCACAGG	0.987986	125005,865,607,390,247,196,172,167,142,112,107,105,101,95,80,80,78,77,63,58,57,57,54,52,52,51,46,45,45,44,44,43,43,43,42,41,41,40,40,39,38,38,37,36,36,34,34,33,33,32,32,31,31,31,30,30,29,29,28,28,28,27,26,25,25,25,24,24,24,23,23,23,23,23,23,22,22,21,21,21,21,21,20,20,19,19,18,18,18,18,17,16,16,15,15,15,14,14,14,14,14,14,14,13,13,12,12,12,12,11,11,11,11,10,10,10,10,10,10,9,9,9,9,9,9,8,8,8,8,8,8,8,…
	MBC_14	0.963028	IGHV6-3*01	IGHV6-3	IGHV6	1	GGCTGAAGACACTGGAATTTATTACTGCACAGTGGATAGTAACTACGTGGGGTATGCTATGGACTACTGGGGTCAAGGAG	0.993524	358454,5013,1504,1099,839,328,252,247,246,197,153,132,128,127,126,126,126,122,119,116,116,113,113,111,110,109,105,100,98,98,97,96,95,94,93,91,90,88,87,87,86,84,77,77,76,76,75,75,75,73,72,71,65,63,62,60,60,58,57,55,55,55,55,54,52,52,52,50,50,43,42,41,41,40,39,38,38,37,37,36,36,35,35,34,34,32,31,30,30,30,29,28,28,27,27,27,26,26,25,25,24,24,23,23,23,23,22,21,21,20,19,19,19,19,18,18,18,18,17,17,17,17…
	MBC_15	0.961483	IGHV9-2*01	IGHV9-2	IGHV9	1	ATGAGGACACGGCTACATATTTCTGTGCAAGAGGGGGTTACGACGGAGACTACTTTGACTACTGGGGCCAAGGATCGATCG	0.987686	267202,132494,46513,4939,1248,1221,884,866,629,619,573,547,441,436,391,390,374,368,365,364,362,351,347,339,312,298,294,287,282,281,279,249,230,222,216,210,205,190,174,167,166,163,155,155,153,147,145,143,142,142,134,126,125,121,118,116,115,111,110,109,107,107,106,103,102,102,101,98,97,96,96,95,95,92,90,90,89,89,89,88,88,84,83,82,82,81,81,77,77,76,75,74,68,68,68,68,68,67,67,66,66,66,64,63,63,62,62,…
	MBC_19	0.790228	IGHV1-4*02	IGHV1-4	IGHV1	1	AGCAGCCTGACATCTGAGGACTCTGCGGTCTATTACTGTGGTAACTACTTTGACTACTGGGGCCAAGGATTTCGATGTCT	0.988416	38125,3858,112,23,17,9,8,8,7,7,7,6,5,5,5,5,5,5,4,4,4,4,4,4,3,3,3,3,3,3,3,3,3,3,2,2,2,2,2,2,2,2,2,2,2,2,2,2,2,2,2,2,2,2,2,2,2,2,2,2,2,2,2,2,2,1,1,1,1,1,1,1,1,1,1,1,1,1,1,1,1,1,1,1,1,1,1,1,1,1,1,1,1,1,1,1,1,1,1,1,1,1,1,1,1,1,1,1,1,1,1,1,1,1,1,1,1,1,1,1,1,1,1,1,1,1,1,1,1,1,1,1,1,1,1,1,1,1,1,1,1,1,1,1,1,1,1,1,1,1,1,1,1,1,1,1,1,1,1,1,1,1,1,1,1,1,1,1,1,1,1,1,1,1,1,1,1,1,1,1,1,1,1,1,1,1,1
SMBC	SMBC_1	0.623587	IGHV5-9-1*02	IGHV5-9-1	IGHV5	1	CCAGGAACACCCTGTACCTGCAAATGAGCAGTCTGAAGTCTGAGGACACAGCCATGTATTACTGTACAAAACTACTCTATGCTATGGACTACTGGGGTCAAGGG	0.943388	1904,163,10,10,9,5,5,5,4,3,3,3,3,2,2,2,1,1,1,1,1,1,1,1,1,1,1,1,1,1,1,1,1,1,1
	SMBC_3	0.538899	IGHV1-4*02	IGHV1-4	IGHV1	0.987952	GCAGTCTGACATCTGAGGACTCTGCGGTCTATTACTGTGCAAGACCGCAAGCTAACTGGGAAAGGATAAGTTACTGGTACTTCGATGTCTGGGGCACAGG	0.918397	7812,2742,180,122,121,100,96,92,85,79,64,62,56,55,52,50,43,40,39,39,36,34,33,31,28,28,27,25,25,24,24,22,20,20,20,19,19,17,16,15,15,15,14,13,13,13,13,13,13,13,12,12,12,12,12,11,11,11,11,11,11,11,11,11,10,10,10,10,10,10,10,10,9,9,9,9,9,9,9,9,9,9,9,8,8,8,8,8,8,8,8,8,7,7,7,7,7,7,7,7,7,7,6,6,6,6,6,6,6,6,6,6,5,5,5,5,5,5,5,5,5,5,5,5,5,5,5,5,5,4,4,4,4,4,4,4,4,4,4,4,4,4,4,4,4,4,4,4,4,4,4,4,4,4,4,4,4,3,3,3…
	SMBC_4	0.858935	IGHV1-26*01	IGHV1-26	IGHV1	1	ACATGGAGCTCCGCAGCCTGACATCTGAGGACTCTGCAGTCTATTACTGTGCAAGAGGGCTACTATGGTCTCTCTTTGACTACTGGGGCCAAGGTAGGCCAAGG	1	51774
	SMBC_5	0.943325	IGHV1-82*01	IGHV1-82	IGHV1	1	CAGCACAGCCTACATGCAACTCAGCAGCCTGACATCTGAGGACTCTGCGGTCTACTTCTGTGCAAACTATGCGAACTTTGACTACTGGGGCCAAGGGGGCCAAGG	0.741907	96062,1543,8,7
	SMBC_8	0.572758	IGHV3-1*01	IGHV3-1	IGHV3	1	AAGTTGAATTCTGTGACTACTGAGGACACAGCCACATATTACTGTGCAAGAGAGGAGATTGATGGTTACTACAACTTTGACTACTGGGGCCAAGGGGGGTCAAGG	1	8124
	SMBC_9	0.76795	IGHV5-4*01	IGHV5-4	IGHV5	0.989247	TGCAAATGAGCCATCTGAAGTCTGAGGACACAGCCATGTATTACTGTGCAAGTGATCCCTACTATAGTGACTACTTTGACTACTGGGGCCAAGGCAAGG	0.937935	2512,1347,591,52,14,11,3,2,2,1,1,1,1,1,1,1,1,1,1,1,1,1,1,1,1,1,1,1,1,1,1,1,1,1,1,1,1,1,1,1,1,1
PPMBC	PPMBC_1	0.620858	IGHV1-9*01	IGHV1-9	IGHV1	0.975309	ACTCAGCAGCCTGACACCTGAGGACTCTGCCATCTATTACTGTGCCCCCATTATTACGGTAGAAGAGGCTATGGACTACTGGGGTCAAGGCCGAAGG	0.864403	1248,16,3,2,2,1,1,1
	PPMBC_2	0.609152	IGHV2-6-6*01	IGHV2-6-6	IGHV2	1	CAGTCTGCAAACTGATGACACAGCCAGGTACTACTGTGCCTCTATTACTACGGTAGTAGCTAGAGGGTTCTATGCTATGGACTACTGGGGTCAAGGTGTCAAGG	1	2556
	PPMBC_3	0.808727	IGHV5-4*01	IGHV5-4	IGHV5	0.988506	TTGCAAATGAGCCATCTGAAATCTGAGGACACAGCCATGTATTACTGTGCAAGCCAGGACTACGGTAGTTCCTACTTTGACTACTGGGGCCAAGGGCGCGATCG	1	4448
	PPMBC_4	0.6796	IGHV1-64*01	IGHV1-64	IGHV1	1	CAGCCTACATGCAACTCAGCAGCCTGACATCTGAGGACTCTGCGGTCTATTACTGTGCAAGCGGTACTACGGTAGTAGTTGACTACTGGGGCCAAGGTCAAGG	0.885115	1034,833,553,158,147,141,101,92,82,73,57,51,39,38,32,31,29,28,27,27,24,23,19,16,13,12,11,11,9,9,8,8,8,8,7,7,7,7,7,6,6,6,6,6,5,5,5,5,5,5,5,4,4,4,4,4,4,4,4,4,4,3,3,3,3,3,3,3,3,3,3,3,3,3,3,2,2,2,2,2,2,2,2,2,2,2,2,2,2,2,2,2,2,2,2,2,2,2,2,2,2,2,2,2,1,1,1,1,1,1,1,1,1,1,1,1,1,1,1,1,1,1,1,1,1,1,1,1,1,1,1,1,1,1,1,1,1,1,1,1,1,1,1,1,1,1,1,1,1,1,1,1,1,1,1,1,1,1,1,1,1,1,1,1,1,1,1,1,1,1,1,1,1,1,1,1,1,1,1,1,1,1…
	PPMBC_5	0.639349	IGHV10-1*01	IGHV10-1	IGHV10	1	CATGCTCTATCTGCAAATGAACAACTTGAAAACTGAGGACACAGCCATGTATTACTGTGTGAGATTACTTGGGTACTTCGATGTCTGGGGCACAGGATCGATCG	1	4010
	PPMBC_6	0.335208	IGHV1-58*01	IGHV1-58	IGHV1	0.922222	CATCCAACATGCAGCTCAGCAGCCTGACAACTGAGGACTCTGCAATGTATTTCTGTGTAATCTGTAATTCTTACTTTACTATGGACTACTGGGGTCAAGG	0.94153	2196,62,32,27,17,14,12,9,8,7,6,6,5,5,5,4,4,4,3,3,3,3,3,3,3,2,2,2,2,2,2,2,1,1,1,1,1,1,1,1,1,1,1,1,1,1,1,1,1,1,1,1,1,1,1,1,1,1,1,1,1,1,1,1,1,1,1,1,1,1,1,1,1,1,1,1,1
	PPMBC_8	0.401089	IGHV1-19*01	IGHV1-19	IGHV1	0.908046	GTGTTCATGGAGCTCAAAGACCTGACACCTGAGGACTCAACAGTCTATTTCTGTGCGAGAAATTACTACTTCTACTTTGACTACTGGGGCCAAGGGTTTTATC	0.844966	1002,634,586,414,233,220,220,131,124,123,106,83,66,60,56,54,54,49,43,41,41,38,34,33,31,27,26,25,24,24,24,23,22,22,21,21,19,19,17,17,17,15,15,15,14,14,14,13,13,13,13,13,12,12,12,12,11,11,11,11,10,10,10,9,9,9,9,8,8,8,8,8,8,8,7,7,7,7,7,7,7,7,7,6,6,6,6,6,6,6,6,6,6,6,6,6,5,5,5,5,5,5,5,5,4,4,4,4,4,4,4,4,4,4,4,4,4,3,3,3,3,3,3,3,3,3,3,3,3,3,3,3,3,3,3,3,3,3,3,3,3,3,3,3,3,3,3,3,3,3,3,3,3,3,3,3,3,3,3,3,3,3,…
	PPMBC_12	0.279759	IGHV9-2*01	IGHV9-2	IGHV9	0.989474	CCTATTTGCAGATCAACAACCTCAAAAATGAGGACACGGCTACATATTTCTGTGCCCCTATTACTACGATAGTCCACTACTTTGACTACTGGGGCCAAGGATCGAT	0.890568	627,593,18,15,10,8,4,4,4,3,2,1,1,1,1,1,1,1,1,1,1,1,1,1,1
	PPMBC_14	0.264466	IGHV1-64*01	IGHV1-64	IGHV1	1	ATCCTCCAGCACAGCCTACATGCAACTCAGCAGCCTGACATCTGAGGACTCTGCGGTCTATTACTGTGCAAGTCACTACTTTGACTACTGGGGCCAAGGGGGCC	0.91284	915,561,233,156,42,26,26,19,8,8,7,6,5,5,4,4,4,4,4,4,3,3,3,3,3,3,3,2,2,2,2,2,2,2,2,2,2,1,1,1,1,1,1,1,1,1,1,1,1,1,1,1,1,1,1,1,1,1,1,1,1,1,1,1,1,1,1,1,1,1,1,1,1,1,1,1,1,1,1,1,1,1,1,1,1,1,1,1,1,1,1,1,1,1
	PPMBC_19	0.67686	IGHV1-4*02	IGHV1-4	IGHV1	1	AGCCTGACATCTGAGGACTCTGCGGTCTATTACTGTGCAAGATGGTACTATGATTACGGTCCTTATTACTATGCTATGGACTACTGGGGTCAAGGATCGA	0.97463	11605,49,42,29,25,21,14,11,10,9,8,8,8,7,7,7,7,6,6,6,5,5,5,5,5,4,4,4,4,4,4,4,3,3,3,3,3,3,3,3,3,3,3,3,3,3,3,2,2,2,2,2,2,2,2,2,2,2,2,2,2,2,2,2,2,2,2,2,2,2,2,2,2,2,2,2,2,2,2,2,1,1,1,1,1,1,1,1,1,1,1,1,1,1,1,1,1,1,1,1,1,1,1,1,1,1,1,1,1,1,1,1,1,1,1,1,1,1,1,1,1,1,1,1,1,1,1,1,1,1,1,1,1,1,1,1,1,1,1,1,1,1,1,1,1,1,1,1,1,1,1,1,1,1,1,1,1,1,1,1,1
	PPMBC_20	0.618078	IGHV9-2*01	IGHV9-2	IGHV9	0.977011	AACCACCTCAAAAATGAGGACACGGCTACATATTTCTGTGCAAGACCCTATACTAACTACCTTTACTGGTACTTCGATGTCTGGGGCACAGG	0.927747	1342,31,20,10,7,6,5,4,4,4,3,3,3,2,2,2,2,2,2,2,2,2,2,2,2,2,2,1,1,1,1,1,1,1,1,1,1,1,1,1,1,1,1,1,1,1,1,1,1,1,1,1,1,1,1,1,1,1,1,1,1,1,1,1,1,1,1,1,1,1,1,1,1,1,1
List of dominant clones of lymphoma samples. Fraction of reads: The fraction of all unique molecular identifiers (UMIs) belonging to the dominant clone. V allele: The identified V allele of the dominant clone. Germline identity of the dominant clone: The fraction of bases identical to the best germline hit, determined by IgBlast. Dominant Sequence: The most prevalent exact sequence within the dom…

## Sheet: Vh usage WT
V family	Frequency (WT)	MBC cases	SMBC cases	PPMBC cases	MBC p-value	MBC p-value (BH adjusted)	SMBC p-value	SMBC p-value (BH adjusted)	PPMBC p-value	PPMBC p-value (BH adjusted)
IGHV1	0.48431	9	3	6	0.456195	1	0.769049	1	0.663326	1
IGHV2	0.0445286	0	0	1	1	1	1	1	0.38726	1
IGHV3	0.0668282	0	1	0	0.632122	1	0.330329	1	1	1
IGHV4	0.0382386	0	0	0	1	1	1	1	1	1
IGHV5	0.0805687	0	2	1	0.63909	1	0.085216	1	0.587804	1
IGHV6	0.0481887	2	0	0	0.163778	1	1	1	1	1
IGHV7	0.0331633	1	0	0	0.39192	1	1	1	1	1
IGHV8	0.0528473	1	0	0	0.547384	1	1	1	1	1
IGHV9	0.0566021	1	0	2	0.572171	1	1	1	0.129406	1
IGHV10	0.0200165	1	0	1	0.259365	1	1	1	0.197627	1
IGHV11	0.0063142	0	0	0	1	1	1	1	1	1
IGHV12	0.0110844	0	0	0	1	1	1	1	1	1
IGHV13	0.00949017	0	0	0	1	1	1	1	1	1
IGHV14	0.0269983	0	0	0	1	1	1	1	1	1
IGHV15	0.00429849	0	0	0	1	1	1	1	1	1
IGHV16	0.000151925	0	0	0	1	1	1	1	1	1

## Sheet: FR_CDR_mutation frequency
Heavy chain (HC)
Genotype	Sample ID	Dominant sequence	Isotype	V allele	D allele	J allele	FR1 length (bp)	FR1 match (bp)	CDR1 length (bp)	CDR1 match (bp)	FR2 length (bp)	FR2 match (bp)	CDR2 length (bp)	CDR2 match (bp)	FR3 length (bp)	FR3 match (bp)	CDR3 length (bp)	CDR3 match (bp)	Overall identity (%)	FR identity (%)	CDR identity (%)	AA changes	num. of AA changes
MBC	MBC_2	GAGGTGAGGGAATGCAAATCTCTCCTGGATCCACCCAACCTTGAGTTGAAAAGCCAAAGCTGGGCCTGTGTACTCACAAGTGTGCAGCCATGGGCAGGCTTACTTCTTCATTCCTGTTACTGATTGTCCCTGCATATGTCCTGTCCCAGGTTACTCTGAAAGAGTCTGGCCCTGGGATATTGCAGCCCTCCCAGACCCTCAGTCTGACTTGTTCTTTCTCTGGGTTTTCACTGAGCACTTTTGGTATGGGTGTAGGCTGGATTCGTCAGCCTTCAGGGAAGGGTCTGGAGTGGCTGGCACACATTTGGTGGGATGATGATAAGTACTATAACCCAGCCCTGAAGAGTCGGCTCACAATCTCCAAGGATACCTCCAAAAACCAGGTATTCCTCAAGATCG…	IgGa	IGHV8-8*01	IGHD2-4*01	IGHJ4*01	75	75	30	30	51	51	21	21	114	114	42	42	100	100	100	no	0
	MBC_7	GATCAACACCCTGAAAACAACATATGTACAATGTCCTCACCACAGACACTGAACACACTGACTCTAACCATGGGATGGAGCTGGATCTTTCTCTTTCTCCTGTCAGGAACTGCAGGTGTCCTCTCTGAGGTCCAGCTGCAACAATCTGGACCTGAGCTGGTGAAGCCTGGGGCTTCAGTGAAGATATCATGTAAGGCTTCTGGATACACGTTCACTGACTACTACATGAACTGGGTGAAGCAGAGCCATGGAAAGAGCCTTGAGTGGATTGGAGATATTAATCCTAACAATGGTGGTACTAGCTACAACCAGAAGTTCAAGGGCAAGGCCACATTGACTGTAGACAAGTCCTCCAGCACAGCCTACATGGAGCTCCGCAGCCTGACATCTGAGGACTCT…	IgA	IGHV1-26*01	IGHD1-1*01	IGHJ4*01	75	74	24	24	51	51	24	24	114	114	45	44	99.3994	99.5833	98.9247	no	0
	MBC_9	GGATATGAGCCCTATATTCTCTACAGACACTGAATCTCAAGGTCCTTACAATGAAATTCAGCTGGGTCATCTTCTTCCTGATGGCAGTGATTACAGGGGTCAATTCAGAGGTTCAGCTGCAGCAGTCTGTGGCAGAGCTTGTGAGGCCAGGGGCCTCAGTCAAGTTGTCCTGCACAGCTTCTGGCTTCAACATTAAAAACACCTATGTACACTGGGTGAAACAGAGGCCTAAACAGGGCCTGGAGTGGATTGGAAGGATTGATCCTGCGAATGGTAATATTAAATATGCCCCGAGATTCCAGGGCAAGGCCACTATAATTGCAGACACATCCTCCAACACAGCCTACCTGAAGTTCAGCAGCCTGACATCTGAAGACACTGTCATCTATTACTGTGCTC…	IgM	IGHV14-3*01	IGHD1-1*01	IGHJ4*01	75	75	24	24	51	47	24	23	114	107	51	49	95.8702	95.4167	96.9697	yes	7
	MBC_19	GGACAGTTACTGAGCACACAGGACCTCACAATGGGATGGAGCTATATCATCCTCTTTTTGGTAGCAACAGCTACAGGTGTCCACTCCCAGGTCCAACTGCAGCAGCCTGGGGCTGAGCTGGTAAAGCCTGGGGCTTCAGTGAAGTTGTCCTGCAAGGCTTCTGGCTACACTTTCACCAGCTACTGGATGCACTGGGTGAAGCAGAGGCCTGGACAAGGCCTTGAGTGGATTGGAATGATTCATCCTAATAGTGGTAGTACTAACTACAATGAGAAGTTCAAGAGCAAGGCCACACTGACTGTAGACAAATCCTCCAGCACAGCCTACATGCAACTCAGCAGCCTGACATCTGAGGACTCTGCGGTCTATTACTGTGGTAACTACTTTGACTACTGGGGC…	IgA	IGHV1-64*01	NA	IGHJ2*01	75	75	24	24	51	51	24	24	114	114	18	18	100	100	100	no	0
SMBC	SMBC_4	GGGAACATATGTTCAATGTCCTCTCCACAGACACTGAACACACTGACTCTAACCATGGGATGGAGCTGGATCTTTCTCTTCCTCCTGTCAGGAACTGCAGGTGTCCTCTCTGAGGTCCAGCTGCAACAGTCTGGACCTGAGTTGGTGAAGCCTGGGGCTTCAGTGAAGATGTCCTGCAAGGCTTCTGGCTACACATTCACTGACTACTACATGCACTGGGTGAAGCAGAGCCATGGAAAGAGCCTTGAGTGGATTGGATATATTTATCCTAACAATGGTGGTAATGGCTACAACCAGAAGTTCAAGGGCAAGGCCACATTGACTGTAGACAAGTCCTCCAGCACAGCCTACATGGAGCTCCGCAGCCTGACATCTGAGGACTCTGCAGTCTATTACTGT…	IgM	IGHV1-34*01	IGHD2-1*01	IGHJ2*01	75	75	24	24	51	51	24	24	114	114	32	32	100	100	100	no	0
	SMBC_5	GATATGACTCCTGTCTTCTACACAGTCCCAGAACACACTCACTCTAACCATGGAATGGCCTTGTATCTTTCTCTTCCTCCTGTCAGTAACTGAAGGTGTCCACTCCCAGGTTCAGCTGCAGCAGTCTGGACCTGAGCTGGTGAAGCCTGGGGCCTCAGTGAAGATTTCCTGCAAGGCTTCTGGCTACGCATTCAGTAGCTCCTGGATGAACTGGGTGAAGCAGAGGCCTGGAAAGGGTCTTGAGTGGATTGGACGGATTTATCCTGGAGATGGAGATACTAACTACAATGGGAAGTTCAAGGGCAAGGCCACACTGACTGCAGACAAATCCTCCAGCACAGCCTACATGCAACTCAGCAGCCTGACATCTGAGGACTCTGCGGTCTACTTCTGTGCAAA…	IgGa	IGHV1-82*01	IGHD1-1*02	IGHJ2*01	75	75	24	24	51	51	24	24	114	114	24	24	100	100	100	no	0
	SMBC_8	GGACACACATCTCTCTCATTAGAGGTTGATCTTTGAGGAAAACAGGGTGTTGCCTAAAGGATGAAAGTGTTGAGTCTGTTGTACCTGTTGACAGCCATTCCTGGTATCCTGTCTGATGTACAGCTTCAGGAGTCAGGACCTGGCCTCGTGAAACCTTCTCAGTCTCTGTCTCTCACCTGCTCTGTCACTGGCTACTCCATCACCAGTGGTTATTACTGGAACTGGATCCGGCAGTTTCCAGGAAACAAACTGGAATGGATGGGCTACATAAGCTACGATGGTAGCAATAACTACAACCCATCTCTCAAAAATCGAATCTCCATCACTCGTGACACATCTAAGAACCAGTTTTTCCTGAAGTTGAATTCTGTGACTACTGAGGACACAGCCACATATTAC…	IgA	IGHV3-6*01	IGHD2-3*01	IGHJ2*01	75	75	27	27	51	51	21	21	114	114	39	39	100	100	100	no	0
PPMBC	PPMBC_1	GATATGATCAGTGTCCTCTCCAAAGTCCTTGAACATAGACTCTAACCATGGAATGGACCTGGGTCTTTCTCTTCCTCCTGTCAGTAACTGCAGGTGTCCACTCCCAGGTTCAGCTGCAGCAGTCTGGAGCTGAGCTGATGAAGCCTGGGGCCTCAGTGAAGCTTTCCTGCAAGGCTACTGGCTACACATTCACTGGCTACTGGATAGAGTGGGTAAAGCAGAGGCCTGGACATGGCCTTGAGTGGATTGGAGAGATTTTACCTGGAAGTGGTAGTATTAACTACAATGAGAAGTTCAAGGGCAAGGCCACATTCACTGCAGATACATCCTCCAACACAGCCTACATGCAACTCAGCAGCCTGACACCTGAGGACTCTGCCATCTATTACTGTGCCCCCA…	IgGa	IGHV1-9*01	IGHD1-1*01	IGHJ4*01	75	75	24	24	51	51	24	23	114	113	36	34	98.7654	99.5833	96.4286	yes	2
	PPMBC_3	GCTCACATTCAGTGATGAGCACTGAACACGGACCCCTCACCATGAACTTCGGGCTCAGCTTGATTTTCCTGGTCCTTGTTTTAAAAGGTGTCCAGTGTGAAATACAGCTGGTGGAGTCTGGGGGAGGCTTAGTGAAGCCTGGAGGGTCCCTGAAACTCTCCTGTGCAGCCTCTGGATTCACTTTCAGTAGCTATGCCATGTCTTGGGTTCGCCAGAATCCGGAAAAGAGGCTGGAGTGGGTCGCAACCATAAGTGATGGTGGGAGTTACACCTACTATCCAGACAATGTAAAGGGTCGATTCACCATCTCCAGAGACAATGCCAAGAACAACCTGTATTTGCAAATGAGCCATCTGAAATCTGAGGACACAGCCATGTATTACTGTGCAAGCCAGGACT…	IgM	IGHV5-4*01	IGHD1-1*01	IGHJ2*01	75	75	27	27	51	51	21	21	114	110	39	39	98.7768	98.3333	100	yes	2
	PPMBC_4	GAAATATAGGGTTGTCTATACCACACACAGAAAAACATGAGATCACAGTTCTCTCTACAGTTACTGAGCACACAGGACCTCACAATGGGATGGAGCTATATCATCCTCTTTTTGGTAGCAACAGCTACAGGTGTCCACTCCCAGGTCCAACTGCAGCAGCCTGGGGCTGAGCTGGTAAAGCCTGGGGCTTCAGTGAAGTTGTCCTGCAAGGCTTCTGGCTACACTTTCACCAGATACTGGATGCACTGGGTGAAGCAGAGGCCTGGACAAGGCCTTGAGTGGATTGGAATGATTCATCCTAATAGTGGTAGTACTAACTACAATGAGAAGTTCAAGAGCAAGGCCACACTGACTGTAGACAAATCCTCCAGCACAGCCTACATGCAACTCAGCAGCCTG…	IgGa	IGHV1-64*01	IGHD1-1*01	IGHJ2*01	75	75	24	23	51	51	24	24	114	114	30	30	99.6855	100	98.7179	yes	1
	PPMBC_19	GAAATATAGGGTTGTCTATACCACACACAGAAAAACATGAGATCACAGTTCTCTCTACAGTTACTGAGCACACAGGACCTCACAATGGGATGGAGCTATATCATCCTCTTTTTGGTAGCAACAGCTACAGGTGTCCACTCCCAGGTCCAACTGCAGCAGCCTGGGGCTGAGCTGGTAAAGCCTGGGGCTTCAGTGAAGTTGTCCTGCAAGGCTTCTGGCTACACTTTCACCAGTTACTGGATGCACTGGGTGAAGCAGAGGCCTGGACAAGGCCTTGAGTGGATTGGAATGATTCATCCTAATAGTGGTAGTACTAACTACAATGAGAAGTTCAAGAGCAAGGCCACACTGACTGTAGACAAATCCTCCAGCACAGCCTACATGCAACTCAGCAGCCTG…	IgGb	IGHV1-64*01	IGHD2-4*01	IGHJ4*01	75	75	24	23	51	51	24	24	114	114	48	48	99.7024	100	98.9583	no	0
	PPMBC_20	GTCACATACCAGCAAGGGAGTGACCAGTTAGTCTTAAGGCACCACTGAGCCCAAGTCTTAGACATCATGGGTTGGCTGTGGAACTTGCTATTCCTGATGGCAGCTGCCCAAAGTGCCCAAGCACAGATCCAGTTGGTACAGTCTGGACCTGAGCTGAAGAAGCCTGGAGAGACAGTCAAGATCTCCTGCAAGGCTTCTGGGTATACCTTCACAACCTATGGAATGACCTGGGTGAAACAGGCTCCAGGAAAGGGTTTAAAGTGGATGGGCTGGATAAACACCTACTCTGGAGTGCCAACATATGCTGATGACTTCAAGGGACGGTTTGCCTTCTCTTTGGAAACCTCTGCCAGCACTGCCTATTTGCAGATCAACAACCTCAAAAATGAGGACACGGCT…	IgGa	IGHV9-3*01	IGHD2-5*01	IGHJ1*03	75	75	24	24	51	50	24	24	114	114	42	41	99.3939	99.5833	98.8889	yes	1
Light chain (LC)
Genotype	Sample ID	Dominant sequence	Isotype	V allele	D allele	J allele	FR1 length (bp)	FR1 match (bp)	CDR1 length (bp)	CDR1 match (bp)	FR2 length (bp)	FR2 match (bp)	CDR2 length (bp)	CDR2 match (bp)	FR3 length (bp)	FR3 match (bp)	CDR3 length (bp)	CDR3 match (bp)	Overall identity (%)	FR identity (%)	CDR identity (%)	AA changes	num. of AA changes
MBC	MBC_2	GGGGAAATGCATCGCACCAGCATGGGCATCAAGATGGAGTCACAGATTCAGGCATTTGTATTCGTGTTTCTCTGGTTGTCTGGTGTTGACGGAGACATTGTGATGACCCAGTCTCACAAATTCATGTCCACATCAGTAGGAGACAGGGTCAGCATCACCTGCAAGGCCAGTCAGGATGTGAGTACTGCTGTAGCCTGGTATCAACAAAAACCAGGGCAATCTCCTAAACTACTGATTTACTGGGCATCCACCCGGCACACTGGAGTCCCTGATCGCTTCACAGGCAGTGGATCTGGGACAGATTATACTCTCACCATCAGCAGTGTGCAGGCTGAAGACCTGGCACTTTATTACTGTCAGCAACATTATAGCACTCCGTACACGTTCGGAGGGGGGACC…	IgK	IGKV6-25*01	NA	IGKJ2*01	78	78	18	18	51	51	9	9	108	108	27	27	100	100	100	no	0
	MBC_7	GGCTCAGAATTTATAAACCAGTATGAACTGAGAAGCATCAGACAGGCAGTGGGAGCAAGATGGATTCACAGGCCCAGGTTCTTATATTGCTGCTGCTATGGGTATCTGGTACCTGTGGGGACATTGTGATGTCACAGTCTCCATCCTCCCTGGCTGTGTCAGCAGGAGAGAAGGTCACTATGAGCTGCAAATCCAGTCAGAGTCTGCTCAACAGTAGAACCCGAAAGAACTACTTGGCTTGGTACCAGCAGCAACCAGGGCAGTCTCCTAAATTGTTGATCTACTGGGCATCCACTAGGGAATCTGGGGTCCCTGATCGCTTCACAGGCAGTGGATCTGGGACAGATTTCACTCTCACCATCAGCAGTGTGCAGGCTGAAGACCTGGCAGTTTATTACT…	IgK	IGKV8-21*01	NA	IGKJ1*01	78	78	36	36	51	48	9	9	108	108	27	27	99.0291	98.7342	100	yes	1
	MBC_9	GGAGCTGCCAGGAGCCTAATAAAGCATCCTCTCTTCCAGCTCTCAGAGATGGAGACAGACACACTCCTGCTATGGGTGCTGCTGCTCTGGGTTCCAGGTTCCACAGGTGACATTGTGTTGACCCAATCTCCAGCTTCTTTGGCTGTGTCTCTAGGGCAGAGGGCCACCATATCCTGTAGAGCCAGTGAAAGTGTTGATAGTTATGGCAATAGTTTTATACACTGGTACCAGCAGAAGCCAGGACAGCCACCCAAACTCCTCATATATCGTGCATCCAACCTAGAATCTGGGATCCCTGCCAGGTTCAGTGGCAGTGGGTCTAGGACAGACTTCACCCTCACCATTAATCCTGTGGAGGCTGATGATGTTGCAACCTATTACTGTCAGCAAAGTAATGAG…	IgK	IGKV3-5*01	NA	IGKJ1*01	78	76	30	30	51	48	9	9	108	108	27	27	98.3498	97.8903	100	yes	1
	MBC_19	GTGGAGAAGGGTTCCATGTGAACAGCAGTTGAACATGGGTCAGTCGGTCCTGAGAGATGGGCGAGTGCCGTTCCGAAGGGACGGGCGATGGCCTCCGTTGCCCTCGGCCGATCGAAAGGGAGTCGGATTCGGGAAACCAACGGTGATGTTGTGATGACCCAGACTCCACTCACTTTGTCGGTTACCATTGGACAACCAGCCTCCATCTCTTGCAAGTCAAGTCAGAGCCTCTTAGATAGTGATGGAAAGACATATTTGAATTGGTTGTTACAGAGGCCAGGCCAGTCTCCAAAGCGCCTAATCTATCTGGTGTCTAAACTGGACTCTGGAGTCCCTGACAGGTTCACTGGCAGTGGATCAGGGACAGATTTCACACTGAAAATCAGCAGAGTGGAGGCT…	IgK	IGKV1-135*01	NA	IGKJ2*01	78	78	33	33	51	51	9	9	108	108	27	27	100	100	100	no	0
SMBC	SMBC_4	GGGGCTGACCAATATTGAAAAGAATAGACCTGGTTTGTGAATTATGGCCTGGATTTCACTTATACTCTCTCTCCTGGCTCTCAGCTCAGGGGCCATTTCCCAGGCTGTTGTGACTCAGGAATCTGCACTCACCACATCACCTGGTGAAACAGTCACACTCACTTGTCGCTCAAGTACTGGGGCTGTTACAACTAGTAACTATGCCAACTGGGTCCAAGAAAAACCAGATCATTTATTCACTGGTCTAATAGGTGGTACCAACAACCGAGCTCCAGGTGTTCCTGCCAGATTCTCAGGCTCCCTGATTGGAGACAAGGCTGCCCTCACCATCACAGGGGCACAGACTGAGGATGAGGCAATATATTTCTGTGCTCTATGGTACAGCAACCATTTTATTTT…	IgL	IGLV1*01	NA	IGLJ3*01	75	75	27	27	52	52	9	9	108	108	27	27	100	100	100	no	0
	SMBC_5	GATTGTGATTGAAGTCAAGACTCAGCCTGGACATGATGTCCTCTGCTCAGTTCCTTGGTCTCCTGTTGCTCTGTTTTCAAGGTACCAGATGTGATATCCAGATGACACAGACTACATCCTCCCTGTCTGCCTCTCTGGGAGACAGAGTCACCATCAGTTGCAGGGCAAGTCAGGACATTAGCAATTATTTAAACTGGTATCAGCAGAAACCAGATGGAACTGTTAAACTCCTGATCTACTACACATCAAGATTACACTCAGGAGTCCCATCAAGGTTCAGTGGCAGTGGGTCTGGAACAGATTATTCTCTCACCATTAGCAACCTGGAGCAAGAAGATATTGCCACTTACTTTTGCCAACAGGGTAATACGCTTCCGTACACGTTCGGAGGGGGGACCA…	IgK	IGKV10-96*01	NA	IGKJ2*01	78	78	18	18	51	51	9	9	108	108	27	27	100	100	100	no	0
	SMBC_8	GGGAAATACATCAGATCAGCATGGGCATCAAGATGGAGTCACAGACTCAGGTCTTTGTATACATGTTGCTGTGGTTGTCTGGTGTTGATGGAGACATTGTGATGACCCAGTCTCAAAAATTCATGTCCACATCAGTAGGAGACAGGGTCAGCGTCACCTGCAAGGCCAGTCAGAATGTGGGTACTAATGTAGCCTGGTATCAACAGAAACCAGGGCAATCTCCTAAAGCACTGATTTACTCGGCATCCTACCGGTACAGTGGAGTCCCTGATCGCTTCACAGGCAGTGGATCTGGGACAGATTTCACTCTCACCATCAGCAATGTGCAGTCTGAAGACTTGGCAGAGTATTTCTGTCAGCAATATAACAGCTATCCTCTCACGTTCGGTGCTGGGACCA…	IgK	IGKV6-15*01	NA	IGKJ5*01	78	78	18	18	51	51	9	9	108	108	27	27	100	100	100	no	0
PPMBC	PPMBC_1	GCATACTAAGAGTTATATTATGTCTGTCTCACAGCCTGCTGCTGACCAATATTGAAAAGAATAGACCTGGTTTGTGAATTATGGCCTGGATTTCACTTATACTCTCTCTCCTGGCTCTCAGCTCAGGGGCCATTTCCCAGGCTGTTGTGACTCAGGAATCTGCACTCACCACATCACCTGGTGAAACAGTCACACTCACTTGTCGCTCAAGTACTGGGGCTGTTACAACTAGTAACTATGCCAACTGGGTCCAAGAAAAACCAGATCATTTATTCACTGGTCTAATAGGTGGTACCAACAACCGAGCTCCAGGTGTTCCTGCCAGATTCTCAGGCTCCCTGATTGGAGACAAGGCTGCCCTCACCATCACAGGGGCACAGACTGAGGATGAGGCAATAT…	IgL	IGLV1*01	NA	IGLJ1*01	75	75	27	27	51	51	9	9	108	108	28	28	100	100	100	no	0
	PPMBC_3	GGATCATACACACTCCAACGGTCATTCTTGGTCAGGAGACGTTGTAGAAATGAGACCGTCTATTCAGTTCCTGGGGCTCTTGTTGTTCTGGCTTCATGGTGCTCAGTGTGACATCCAAATGACACAGTCTCCATCCTCACTGTCTGCATCTCTGGGAGGCAAAGTCACCTTCACTTGCAAGGCAAGCCAAGACATTGACAACTATATAGCTTGGTACCAACACAAGCCTGGAAAGGGTCCTAGGCTATTCATACATTACACATCTACATTACAGCCAGGCATCCCATCAAGGTTCAGTGGAAGTGGGTCTGGGAGAGATTATTCCTTCAGCATCAGCAACCTGGAGCCTGAAGATATTGCAACTTATTATTGTCTACAGTATGATAATCTTCTGTGGAC…	IgK	IGKV19-93*01	NA	IGKJ1*01	78	76	18	16	51	48	9	9	108	108	27	27	97.5945	97.8903	96.2963	yes	4
	PPMBC_4	GGTGCCCTTGGAGCAACAGTACATACTCTGCTGATTTGCATATGAAATAATTTTATAACAGCCCAGGCTTCTTTAAGGGCAGCTGCCAGGAGCCTAAGAAGCATTCTCTCTTCCAGTTCTCAGAGATGGAGAAAGACACACTCCTGCTATGGGTCCTGCTTCTCTGGGTTCCAGGTTCCACAGGTGACATTGTGCTGACCCAATCTCCAGCTTCTTTGGCTGTGTCTCTAGGGCAGAGGGCCACCATCTCCTGCAGAGCCAGCGAAAGTGTTGATAATTATGGCATTAGTTTTATGAACTGGTTCCAACAGAAACCAGGACAGCCACCCAAACTCCTCATCTATGTTGCATCCAACCAAGGATCCGGGGTCCCTGCCAGGTTTAGTGGCAGTGGGTCTG…	IgK	IGKV3-2*01	NA	IGKJ1*01	78	78	30	30	51	51	9	8	108	108	27	27	99.67	100	98.4848	yes	1
	PPMBC_19	GGTAATTAGCTAGGGACCAAAATTCAAAGACAAAATGTATTTTCAAGTGCAGATTTTCAGCTTCCTGCTAATGAGTGCCTCAGTCATAATGTCCAGGGGACAAATTGTTCTCACCCAGTCTCCAGCACTCATGTCTGCATCTCCAGGGGAGAAGGTCACCATGACCTGCAGTGCCAGGTCAAGTGTAAGTTACATGTACTGGTACAAGCAGAAGCCAAGATCCTCCCCCAAACCCTGGATTTATCTCACATCCAACCTGGCTTCTGGAGTCCCTGCTCGCTTCAGTGGCAGTGGGTCTGGGACCTCTTACTCTCTCACAATCAGCAGCATGGAGGCTGAAGATGCTGCCACTTATTACTGCCAGCAGTGGAGTAGTAACCCGCTCACGTTCGGTGCTGG…	IgK	IGKV4-68*01	NA	IGKJ5*01	78	77	15	15	51	50	9	9	108	108	27	25	98.6111	99.1561	96.0784	yes	3
	PPMBC_20	TACGGGGGACCAATATTGAAAATAATAGACTTGGTTTGTGAATTATGGCCTGGACTTCACTTATACTCTCTCTCCTGGCTCTCTGCTCAGGAGCCAGTTCCCAGGCTGTTGTGACTCAGGAATCTGCACTCACCACATCACCTGGTGGAACAGTCATACTCACTTGTCGCTCAAGTACTGGGGCTGTTACAACTAGTAACTATGCCAACTGGGTCCAAGAAAAACCAGATCATTTATTCACTGGTCTAATAGGTGGTACCAGCAACCGAGCTCCAGGTGTCAGATTCTCAGGCTCCCTGATTGGAGACAAGGCTGCCCTCACCATCACAGGGGCACAGACTGAGGATGATGCAATGTATTTCTGTGCTCTATGGTACAGTACCCATATGTTTTCGGCGG…	IgL	IGLV2*02	NA	IGLJ2*01	75	75	27	27	51	51	9	9	108	102	26	25	97.6351	97.4359	98.3871	yes	4
Summary (HC + LC)
Genotype	Sample ID	FR identity	CDR identity	Overall identity	Overall AA changes	AA changes (per 100 AA)
MBC	MBC_2	1	1	1	0	0
	MBC_7	0.991614	0.993939	0.992212	1	0.46729
	MBC_9	0.966457	0.981818	0.970405	8	3.73832
	MBC_19	1	1	1	0	0
SMBC	SMBC_4	1	1	1	0	0
	SMBC_5	1	1	1	0	0
	SMBC_8	1	1	1	0	0
PPMBC	PPMBC_1	0.99789	0.97973	0.993569	2	0.96463
	PPMBC_3	0.981132	0.985816	0.982201	6	2.91262
	PPMBC_4	1	0.986111	0.996779	2	0.966184
	PPMBC_19	0.995807	0.979592	0.991987	3	1.44231
	PPMBC_20	0.985232	0.986842	0.985623	5	2.39617
