# Supplementary material for: Distinct Genetically Determined Origins of Myd88 / BCL2 -Driven Aggressive Lymphoma Rationalize Targeted Therapeutic Intervention Strategies
Source: Oxford University Press journal article supplement (doi:10.1158/2643-3230.bcd-22-0007), 2022-11-07
Supplement: bcd-22-0007_table_s3_suppst3.xlsx [file bcd-22-0007_table_s3_suppst3.xlsx]

## Sheet: MBC_1
Subclone size (number of UMIs)	Sequence	V allele	V match (bp)	V length (bp)	V identity (% of germline)	D allele	D match (bp)	D length (bp)	D identity (% of germline)	J allele	J match (bp)	J length (bp)	J identity (% of germline)	Total length (bp)	Total match (bp)	Total identity (% of germline)
4138	gaggactctgcggtctatttctgtgcaagagagattactacggtctggtacttcgatgtctggggcacagggggtctcta	IGHV1-54*01	30	30	100	IGHD1-1*01	11	11	100	IGHJ1*03	28	28	100	69	69	1
83	aggactctgcggtctatttctgtgcaagagagattactacggtctggtacttcgatgtctggggcacaggg	IGHV1-54*01	29	29	100	IGHD1-1*01	11	11	100	IGHJ1*03	28	28	100	68	68	1
15	gaggactcggcggtctatttctgtgcaagagagattactacggtctggtacttcgatgtctggggcacagg	IGHV1-54*01	29	30	96.7	IGHD1-1*01	11	11	100	IGHJ1*03	27	27	100	68	67	0.985294
13	agtactctgcggtctatttctgtgcaagagagattactacggtctggtacttcgatgtctggggcacagg	IGHV1-54*01	28	29	96.6	IGHD1-1*01	11	11	100	IGHJ1*03	27	27	100	67	66	0.985075
11	gggactctgcggtctatttctgtgcaagagagattactacggtctggtacttcgatgtctggggcacagg	IGHV1-54*01	28	28	100	IGHD1-1*01	11	11	100	IGHJ1*03	27	27	100	66	66	1
8	gaggcctctgcggtctatttctgtgcaagagagattactacggtctggtacttcgatgtctggggcacagg	IGHV1-54*01	29	30	96.7	IGHD1-1*01	11	11	100	IGHJ1*03	27	27	100	68	67	0.985294
8	agggctctgcggtctatttctgtgcaagagagattactacggtctggtacttcgatgtctggggcacagg	IGHV1-54*01	28	29	96.6	IGHD1-1*01	11	11	100	IGHJ1*03	27	27	100	67	66	0.985075
7	gaggactccgcggtctatttctgtgcaagagagattactacggtctggtacttcgatgtctggggcacagg	IGHV1-54*01	29	30	96.7	IGHD1-1*01	11	11	100	IGHJ1*03	27	27	100	68	67	0.985294
6	gaggactttgcggtctatttctgtgcaagagagattactacggtctggtacttcgatgtctggggcacagg	IGHV1-54*01	29	30	96.7	IGHD1-1*01	11	11	100	IGHJ1*03	27	27	100	68	67	0.985294
5	gaggactgtgcggtctatttctgtgcaagagagattactacggtctggtacttcgatgtctggggcacagg	IGHV1-54*01	29	30	96.7	IGHD1-1*01	11	11	100	IGHJ1*03	27	27	100	68	67	0.985294
5	aggattctgcggtctatttctgtgcaagagagattactacggtctggtacttcgatgtctggggcacaggg	IGHV1-54*01	28	29	96.6	IGHD1-1*01	11	11	100	IGHJ1*03	28	28	100	68	67	0.985294
5	ggacgctgcggtctatttctgtgcaagagagattactacggtctggtacttcgatgtctggggcacagg	IGHV1-54*01	27	28	96.4	IGHD1-1*01	11	11	100	IGHJ1*03	27	27	100	66	65	0.984848
4	gaggactatgcggtctatttctgtgcaagagagattactacggtctggtacttcgatgtctggggcacagg	IGHV1-54*01	29	30	96.7	IGHD1-1*01	11	11	100	IGHJ1*03	27	27	100	68	67	0.985294
4	aaggaatctgcggtctatttctgtgcaagagagattactacggtctggtacttcgatgtctggggcacagg	IGHV1-54*01	28	29	96.6	IGHD1-1*01	11	11	100	IGHJ1*03	27	27	100	67	66	0.985075
4	gaggtctctgcggtctatttctgtgcaagagagattactacggtctggtacttcgatgtctggggcacagg	IGHV1-54*01	29	30	96.7	IGHD1-1*01	11	11	100	IGHJ1*03	27	27	100	68	67	0.985294
3	gaggagtctgcggtctatttctgtgcaagagagattactacggtctggtacttcgatgtctggggcacagg	IGHV1-54*01	29	30	96.7	IGHD1-1*01	11	11	100	IGHJ1*03	27	27	100	68	67	0.985294
3	ggaccctgcggtctatttctgtgcaagagagattactacggtctggtacttcgatgtctggggcacagg	IGHV1-54*01	27	28	96.4	IGHD1-1*01	11	11	100	IGHJ1*03	27	27	100	66	65	0.984848
3	aggactctgtggtctatttctgtgcaagagagattactacggtctggtacttcgatgtctggggcacagg	IGHV1-54*01	28	29	96.6	IGHD1-1*01	11	11	100	IGHJ1*03	27	27	100	67	66	0.985075
3	gtggactctgcggtctatttctgtgcaagagagattactacggtctggtacttcgatgtctggggcacagg	IGHV1-54*01	28	28	100	IGHD1-1*01	11	11	100	IGHJ1*03	27	27	100	66	66	1
2	ggactctgcggtctatttctgcgcaagagagattactacggtctggtacttcgatgtctggggcacagg	IGHV1-54*01	27	28	96.4	IGHD1-1*01	11	11	100	IGHJ1*03	27	27	100	66	65	0.984848
2	ggactctgcggtctatttctgtgcaggagagattactacggtctggtacttcgatgtctggggcacagg	IGHV1-54*01	27	28	96.4	IGHD1-1*01	11	11	100	IGHJ1*03	27	27	100	66	65	0.984848
2	aggactctgcggtctatttctgtgcaagagagattactacggtctggtacttcgatgtctggggcacaggt	IGHV1-54*01	29	29	100	IGHD1-1*01	11	11	100	IGHJ1*03	27	27	100	67	67	1
2	actctgcggtctatttctgtgtaagagagattactacggtctggtacttcgatgtctggggcacagg	IGHV1-54*01	25	26	96.2	IGHD1-1*01	11	11	100	IGHJ1*03	27	27	100	64	63	0.984375
2	gaggactgcggtctatttctgtgcaagagagattactacggtctggtacttcgatgtctggggcacagg	IGHV1-54*01	23	23	100	IGHD1-1*01	11	11	100	IGHJ1*03	27	27	100	61	61	1
2	gcggtctatttctgtgcaagagagattactacggtctggtatttcgatgtctggggcacagg	IGHV1-54*01	21	21	100	IGHD1-1*01	11	11	100	IGHJ1*03	26	27	96.3	59	58	0.983051
2	gaggactctgcggtctatttctgtgcaagagagattgctacggtctggtacttcgatgtctggggcacagg	IGHV1-54*01	30	30	100	IGHD1-1*01	10	11	90.9	IGHJ1*03	27	27	100	68	67	0.985294
2	ggactctgctgtctatttctgtgcaagagagattactacggtctggtacttcgatgtctggggcacagg	IGHV1-54*01	27	28	96.4	IGHD1-1*01	11	11	100	IGHJ1*03	27	27	100	66	65	0.984848
2	gcggtctatttctgtgcaagagagattactactgtctggtacttcgatgtctggggcacagg	IGHV1-54*01	21	21	100	IGHD1-1*01	10	11	90.9	IGHJ1*03	27	27	100	59	58	0.983051
2	ggactctgcggtctatttctgtacaagagagattactacggtctggtacttcgatgtctggggcacagg	IGHV1-54*01	27	28	96.4	IGHD1-1*01	11	11	100	IGHJ1*03	27	27	100	66	65	0.984848
2	aggcctctgcggtctatttctgtgcaagagagattactacggtctggtacttcgatgtctgggtcacagg	IGHV1-54*01	28	29	96.6	IGHD1-1*01	11	11	100	IGHJ1*03	26	27	96.3	67	65	0.970149
2	gcggactctgcggtctatttctgtgcaagagagattactacggtctggtacttcgatgtctggggcacagg	IGHV1-54*01	28	28	100	IGHD1-1*01	11	11	100	IGHJ1*03	27	27	100	66	66	1
2	ggacactgcggtctatttctgtgcaagagagattactacggtctggtacttcgatgtctggggcacagg	IGHV1-54*01	27	28	96.4	IGHD1-1*01	11	11	100	IGHJ1*03	27	27	100	66	65	0.984848
2	aagactctgcggtctatttctgtgcaagagagattactacggtctggtacttcgatgtctggggcacagg	IGHV1-54*01	27	27	100	IGHD1-1*01	11	11	100	IGHJ1*03	27	27	100	65	65	1
2	acgactctgcggtctatttctgtgcaagagagattactacggtctggtacttcgatgtctggggcacagg	IGHV1-54*01	27	27	100	IGHD1-1*01	11	11	100	IGHJ1*03	27	27	100	65	65	1
2	gagcactctgcggtctatttctgtgcaagagagattactacggtctggtacttcgatgtctggggcacagg	IGHV1-54*01	29	30	96.7	IGHD1-1*01	11	11	100	IGHJ1*03	27	27	100	68	67	0.985294
2	gaggactctgcggtctatttctgtgcaagagagatcactacggtctggtacttcgatgtctggggcacagg	IGHV1-54*01	30	30	100	IGHD1-1*01	10	11	90.9	IGHJ1*03	27	27	100	68	67	0.985294
1	gtttctgcggtctatttctgtgcaagagagattactacggtctggtacttcgatgtctggggcacagg	IGHV1-54*01	24	24	100	IGHD1-1*01	11	11	100	IGHJ1*03	27	27	100	62	62	1
1	gcggtctatttctgtgcaagagagattactacggtttggtacttcgatgtctggggcacagg	IGHV1-54*01	21	21	100	IGHD1-1*01	11	11	100	IGHJ1*03	26	26	100	58	58	1
1	aggactctgcggtctatttctgtgcaagagagattactacggtctggtccttcgatgtctggggcacagg	IGHV1-54*01	29	29	100	IGHD1-1*01	11	11	100	IGHJ1*03	26	27	96.3	67	66	0.985075
1	actctgcggtctatttctgtgcaagagagattacaacggtctggtacttcgatgtctggggcacagg	IGHV1-54*01	26	26	100	IGHD1-1*01	10	11	90.9	IGHJ1*03	27	27	100	64	63	0.984375
1	gcggtctatttctgagcaagagagattactacggtctggtacttcgatgtctggggcacagg	IGHV1-54*01	20	21	95.2	IGHD1-1*01	11	11	100	IGHJ1*03	27	27	100	59	58	0.983051
1	gactctgcggtctatttctgtgcaagagagattactacggtcgggtacttcgatgtctggggcacagg	IGHV1-54*01	27	27	100	IGHD1-1*01	11	11	100	IGHJ1*03	25	25	100	63	63	1
1	gcggtctatttctgtgcaagagatattactacggtctggtacttcgatgtctggggcacagg	IGHV1-54*01	21	21	100	IGHD1-1*01	12	12	100	IGHJ1*03	27	27	100	60	60	1
1	gcggtctatttctgtgcaagagagattactacggtctgatacttcgatgtctggggcacagg	IGHV1-54*01	21	21	100	IGHD1-1*01	11	11	100	IGHJ1*03	26	27	96.3	59	58	0.983051
1	gaggactctgcggtctatttctgtgcaagagagattactacgatctggtacttcgatgtctggggcacagg	IGHV1-54*01	30	30	100	IGHD1-1*01	9	9	100	IGHJ1*03	27	27	100	66	66	1
1	gcggtctatttctgtgcaagagagactactacggtctggtacttcgatgtctggggcacagg	IGHV1-54*01	21	21	100	IGHD1-1*01	9	9	100	IGHJ1*03	27	27	100	57	57	1
1	gcggtctatttctgtgcaagagagattactacggtctggtactttgatgtctggggcacagg	IGHV1-54*01	21	21	100	IGHD1-1*01	11	11	100	IGHJ1*03	26	27	96.3	59	58	0.983051
1	gaggactctcggtctatttctgtgcaagagagattactacggtctggtacttcgatgtctggggcacaggagg	IGHV1-54*01	29	30	96.7	IGHD1-1*01	11	11	100	IGHJ1*03	27	27	100	68	67	0.985294
1	gagccctctgcggtctatttctgtgcaagagagattactacggtctggtacttcgatgtctggggcacagg	IGHV1-54*01	28	30	93.3	IGHD1-1*01	11	11	100	IGHJ1*03	27	27	100	68	66	0.970588
1	actctgcggtctatttctgtgcaagagagattactacggtctagtacttcgatgtctggggcacagg	IGHV1-54*01	26	26	100	IGHD1-1*01	11	11	100	IGHJ1*03	26	27	96.3	64	63	0.984375
1	gaggactctgcggtctatttctgtgcaagagagattactacggtctggtacttcgatgtcttgggcacagg	IGHV1-54*01	30	30	100	IGHD1-1*01	11	11	100	IGHJ1*03	26	27	96.3	68	67	0.985294
1	ctgcggtttatttctgtgcaagagagattactacggtctggtacttcgatgtctggggcacagg	IGHV1-54*01	22	23	95.7	IGHD1-1*01	11	11	100	IGHJ1*03	27	27	100	61	60	0.983607
1	gcgatctatttctgtgcaagagagattactacggtctggtacttcgatgtctggggcacagg	IGHV1-54*01	20	21	95.2	IGHD1-1*01	11	11	100	IGHJ1*03	27	27	100	59	58	0.983051
1	aggactctgcggtctatttctgtgcaagagagattactacggtctggtacttcgatgtctggggcacagga	IGHV1-54*01	29	29	100	IGHD1-1*01	11	11	100	IGHJ1*03	27	27	100	67	67	1
1	gcggtccatttctgtgcaagagagattactacggtctggtacttcgatgtctggggcacagg	IGHV1-54*01	20	21	95.2	IGHD1-1*01	11	11	100	IGHJ1*03	27	27	100	59	58	0.983051
1	gaggactctgcggtctatttctgtgcaagagagattactacggtctggtacttcgatgtctggggcaaagg	IGHV1-54*01	30	30	100	IGHD1-1*01	11	11	100	IGHJ1*03	26	27	96.3	68	67	0.985294
1	ctgcggtctatttctgtgcaagagagattactacggtctggtacttcgatgtctggggcacaag	IGHV1-54*01	23	23	100	IGHD1-1*01	11	11	100	IGHJ1*03	25	25	100	59	59	1
1	gcggtctatttctgtgcaagagagattactacggtctggtacatcgatgtctggggcacagg	IGHV1-54*01	21	21	100	IGHD1-1*01	11	11	100	IGHJ1*03	26	27	96.3	59	58	0.983051
1	ggttgctgcggtctatttctgtgcaagagagattactacggtctggtacttcgatgtctggggcacagg	IGHV1-54*01	23	23	100	IGHD1-1*01	11	11	100	IGHJ1*03	27	27	100	61	61	1
1	ggactctgcggtctatttctgtgcaagagagattactatggtctggtacttcgatgtctggggcacagg	IGHV1-54*01	28	28	100	IGHD1-1*01	10	11	90.9	IGHJ1*03	27	27	100	66	65	0.984848
1	aggactctgcggtctatttctgtgcaagggagattactacggtctggtacttcgatgtctggggcacagg	IGHV1-54*01	28	28	100	IGHD1-1*01	11	11	100	IGHJ1*03	27	27	100	66	66	1
1	gcggtctatttctgtgcaagagagattactacggtctggtagttcgatgtctggggcacagg	IGHV1-54*01	21	21	100	IGHD1-1*01	11	11	100	IGHJ1*03	26	27	96.3	59	58	0.983051
1	gcggtctatttctgtgcaagagggattactacggtctggtacttcgatgtctggggcacagg	IGHV1-54*01	21	21	100	IGHD1-1*01	11	11	100	IGHJ1*03	27	27	100	59	59	1
1	gagaactctgcggtctatttctgtgcaagagagattactacggtctggtacttcgatgtctggggcacagg	IGHV1-54*01	29	30	96.7	IGHD1-1*01	11	11	100	IGHJ1*03	27	27	100	68	67	0.985294
1	gcggtctatttctgggcaagagagattactacggtctggtacttcgatgtctggggcacagg	IGHV1-54*01	20	21	95.2	IGHD1-1*01	11	11	100	IGHJ1*03	27	27	100	59	58	0.983051

## Sheet: MBC_2
Subclone size (number of UMIs)	Sequence	V allele	V match (bp)	V length (bp)	V identity (% of germline)	D allele	D match (bp)	D length (bp)	D identity (% of germline)	J allele	J match (bp)	J length (bp)	J identity (% of germline)	Total length (bp)	Total match (bp)	Total identity (% of germline)
3557	actgccacatactactgtgctcgacattatgattacgacggaggagatgctatggactactggggccaagg	IGHV8-11*01	24	24	100	IGHD2-4*01	12	12	100	IGHJ4*01	24	25	96	61	60	0.983607
271	actgccacatactactgtgctcgacattatgattacgacggaggagatgctatggactactggggtcaagg	IGHV8-11*01	24	24	100	IGHD2-4*01	12	12	100	IGHJ4*01	25	25	100	61	61	1
226	actgccacatactactgtgctcgacattatgattacgacggaggagatgctattgactactggggccaagg	IGHV8-11*01	24	24	100	IGHD2-4*01	12	12	100	IGHJ4*01	23	25	92	61	59	0.967213
14	atactactgtgctcgacattatgattacgacggaggagatgctatggactactggggcacagg	IGHV8-11*01	16	16	100	IGHD2-4*01	12	12	100	IGHJ4*01	19	19	100	47	47	1
13	catactactgtgctcgacattaggattacgacggaggagatgctatggactactggggccaagg	IGHV8-11*01	17	17	100	IGHD2-4*01	11	12	91.7	IGHJ4*01	24	25	96	54	52	0.962963
11	agactactgtgctcgacattatgattacgacggaggagatgctattgactactggggccaagg	IGHV8-11*01	14	14	100	IGHD2-4*01	12	12	100	IGHJ4*01	23	25	92	51	49	0.960784
9	aaactactgtgctcgacattatgattacgacggaggagatgctattgactactggggccaagg	IGHV8-11*01	14	14	100	IGHD2-4*01	12	12	100	IGHJ4*01	23	25	92	51	49	0.960784
8	catactactgttctcgacattatgattacgacggaggagatgctatggactactggggccaagg	IGHV8-11*01	16	17	94.1	IGHD2-4*01	12	12	100	IGHJ4*01	24	25	96	54	52	0.962963
7	cagactactgtgctcgacattaggattacgacggaggagatgctatggactactggggccaagg	IGHV8-11*01	16	17	94.1	IGHD2-4*01	11	12	91.7	IGHJ4*01	24	25	96	54	51	0.944444
6	gccacatactactgtgctcgacattatgattacgacggaggagatgctatggactactggggccaaag	IGHV8-11*01	21	21	100	IGHD2-4*01	12	12	100	IGHJ4*01	22	23	95.7	56	55	0.982143
6	actgccacatactactgtgctcgacattatgattacgacggaggagaggctatggactactggggccaagg	IGHV8-11*01	24	24	100	IGHD2-4*01	12	12	100	IGHJ4*01	22	23	95.7	59	58	0.983051
6	atactactgtgctcgacattatgatcacgacggaggagatgctatggactactggggccaagg	IGHV8-11*01	16	16	100	IGHD2-4*01	11	12	91.7	IGHJ4*01	24	25	96	53	51	0.962264
5	cactactgtgctcgacattatgattacgacggaggagatgctattgattactggggccaagg	IGHV8-11*01	14	14	100	IGHD2-4*01	12	12	100	IGHJ4*01	22	25	88	51	48	0.941176
5	atactactgtgctcgacattatgattacgacggaggagatgctgtggactactggggccaagg	IGHV8-11*01	16	16	100	IGHD2-4*01	12	12	100	IGHJ4*01	23	25	92	53	51	0.962264
5	atactgctgtgctcgacattatgattacgacggaggagatgctatggactactggggccaagg	IGHV8-11*01	15	16	93.8	IGHD2-4*01	12	12	100	IGHJ4*01	24	25	96	53	51	0.962264
5	atactactgtgctcgacattatggttacgacggaggagatgctatggactactggggccaagg	IGHV8-11*01	16	16	100	IGHD2-4*01	11	12	91.7	IGHJ4*01	24	25	96	53	51	0.962264
5	atactactgtgctcgacattatgattacgacggaggaggtgctatggactactggggccaagg	IGHV8-11*01	16	16	100	IGHD2-4*01	12	12	100	IGHJ4*01	23	24	95.8	52	51	0.980769
5	atactactgtgctcgacattatgattatgacggaggagatgctatggactactggggccaagg	IGHV8-11*01	16	16	100	IGHD2-4*01	11	12	91.7	IGHJ4*01	24	25	96	53	51	0.962264
5	gccacatactactgtgctcgacattatgattacgacgggggagatgctatggactactggggccaagg	IGHV8-11*01	21	21	100	IGHD2-4*01	12	12	100	IGHJ4*01	24	25	96	58	57	0.982759
5	atactactgtgctcgacattatgattacgacggaggagatgctatggactactggggccaaga	IGHV8-11*01	16	16	100	IGHD2-4*01	12	12	100	IGHJ4*01	23	24	95.8	52	51	0.980769
4	gccacatactactgtgctcgacattatgattacgacggaggagatgctatggactactggggcaaagg	IGHV8-11*01	21	21	100	IGHD2-4*01	12	12	100	IGHJ4*01	23	25	92	58	56	0.965517
4	atgctactgtgctcgacattatgattacgacggaggagatgctatggactactggggccaagg	IGHV8-11*01	15	16	93.8	IGHD2-4*01	12	12	100	IGHJ4*01	24	25	96	53	51	0.962264
4	actgccacatactactgtgctcggcattatgattacgacggaggagatgctatggactactggggccaagg	IGHV8-11*01	23	23	100	IGHD2-4*01	12	12	100	IGHJ4*01	24	25	96	60	59	0.983333
4	atactactgtgctcgacattatgattacgacggaggagatgctatggactactgggaccaagg	IGHV8-11*01	16	16	100	IGHD2-4*01	12	12	100	IGHJ4*01	23	25	92	53	51	0.962264
4	gccacatactactgtgctcgacattatgattacgacggaggagatgcgatggactactggggtcaagg	IGHV8-11*01	21	21	100	IGHD2-4*01	12	12	100	IGHJ4*01	24	25	96	58	57	0.982759
4	actactgtgctcgacattatgattacgtcggaggagatgctatggactactggggccaagg	IGHV8-11*01	14	14	100	IGHD2-4*01	10	10	100	IGHJ4*01	24	25	96	49	48	0.979592
4	aactactgtgcttgacattatgattacgacggaggagatgctatggactactggggccaagg	IGHV8-11*01	13	14	92.9	IGHD2-4*01	12	12	100	IGHJ4*01	24	25	96	51	49	0.960784
3	atactactgtgcgcgacattatgattacgacggaggagatgctatggactactggggccaagg	IGHV8-11*01	15	16	93.8	IGHD2-4*01	12	12	100	IGHJ4*01	24	25	96	53	51	0.962264
3	atactactgtgctcgacattatgattacgacggaggagatgctatggactactggggtcaaga	IGHV8-11*01	16	16	100	IGHD2-4*01	12	12	100	IGHJ4*01	24	24	100	52	52	1
3	actactgtgctcgacattatgattacgactgaggagatgctatggactactggggccaagg	IGHV8-11*01	14	14	100	IGHD2-4*01	12	12	100	IGHJ4*01	24	25	96	51	50	0.980392
3	gccacatactactgtgctcgacattatgattacgacggaggagatgctattgactactggggtcaagg	IGHV8-11*01	21	21	100	IGHD2-4*01	12	12	100	IGHJ4*01	24	25	96	58	57	0.982759
3	gccacatactactgtgctcgacattatgattacgacagaggagatgctatggactactggggccaagg	IGHV8-11*01	21	21	100	IGHD2-4*01	12	12	100	IGHJ4*01	24	25	96	58	57	0.982759
3	gccacaaactactgtgctcgacattatgattacgacggaggagatgctatggattactggggccaagg	IGHV8-11*01	20	21	95.2	IGHD2-4*01	12	12	100	IGHJ4*01	23	25	92	58	55	0.948276
3	atattactgtgctcgacattatgattacgacggaggagatgctatggactactggggccaagg	IGHV8-11*01	15	16	93.8									16	15	0.9375
3	catactactgtgctcgacattatgattacgacggaggggatgctatggactactggggccaagg	IGHV8-11*01	17	17	100	IGHD2-4*01	12	12	100	IGHJ4*01	24	25	96	54	53	0.981481
3	atactactgtgctcgacattatgattacgacggaggagatgctatagactactggggccaagg	IGHV8-11*01	16	16	100	IGHD2-4*01	12	12	100	IGHJ4*01	23	25	92	53	51	0.962264
3	gccacatactactgtgctcgacatgatgattacgacggaggagatgctatggactactggggccaagg	IGHV8-11*01	21	21	100	IGHD2-4*01	11	11	100	IGHJ4*01	24	25	96	57	56	0.982456
2	aaactactgtgctcgacattatgattacgacggaggagatgttatggactactggggccaagg	IGHV8-11*01	14	14	100	IGHD2-4*01	12	12	100	IGHJ4*01	23	25	92	51	49	0.960784
2	gactactgtgctcgacatcatgattacgacggaggagatgctatggactactggggccaagg	IGHV8-11*01	14	14	100	IGHD2-4*01	11	11	100	IGHJ4*01	24	25	96	50	49	0.98
2	actactgttctcgacattatgattacgacggaggagatgctattgactactggggccaagg													0	0	#NUM!
2	aactactgtactcgacattatgattacgacggaggagatgctatggactactggggccaagg													0	0	#NUM!
2	actgccacatactactgtgctcgacattatgattacgacggaggagatgctatgaactactggggccaagg	IGHV8-11*01	24	24	100	IGHD2-4*01	12	12	100	IGHJ4*01	23	25	92	61	59	0.967213
2	atactactgtgctcgacattatgattacgacggaggagatgctatggactactgaggccaagg	IGHV8-11*01	16	16	100	IGHD2-4*01	12	12	100	IGHJ4*01	23	25	92	53	51	0.962264
2	gactactgtgctcgacattatgattacgacggaggagatgctatggactactggggtcaagg	IGHV8-11*01	14	14	100	IGHD2-4*01	12	12	100	IGHJ4*01	25	25	100	51	51	1
2	actactgtgctcgacactatgattacgacggaggagatgctatggactactggggccaagg	IGHV8-11*01	14	14	100	IGHD2-4*01	14	14	100	IGHJ4*01	24	25	96	53	52	0.981132
2	atactactgtgctcgacagtatgattacgacggaggagatgctatggactactggggccaagg	IGHV8-11*01	16	16	100	IGHD2-4*01	12	12	100	IGHJ4*01	24	25	96	53	52	0.981132
2	atactactgtgctcgacattatgattacgacggaggagatgccatggactactggggccaagg	IGHV8-11*01	16	16	100	IGHD2-4*01	12	12	100	IGHJ4*01	23	25	92	53	51	0.962264
2	atactactgtgctcgacattatgattacgacggaggagatgctatggactgctggggccaagg	IGHV8-11*01	16	16	100	IGHD2-4*01	12	12	100	IGHJ4*01	23	25	92	53	51	0.962264
2	atactactgtgatcgacattatgattacgacggaggagatgctatggactactggggccaagg	IGHV8-11*01	15	16	93.8	IGHD2-4*01	12	12	100	IGHJ4*01	24	25	96	53	51	0.962264
2	gactactgtgctcgacattatgattacgacggaggagatgctatggactactgggggcaagg	IGHV8-11*01	14	14	100	IGHD2-4*01	12	12	100	IGHJ4*01	24	25	96	51	50	0.980392
2	aaccactgtgctcgacattatgattacgacggaggagatgctatggactactggggccaagg	IGHV8-11*01	13	14	92.9	IGHD2-4*01	12	12	100	IGHJ4*01	24	25	96	51	49	0.960784
2	acatactactgtgctcgacattatgattacgacggaggagatgccatggactactggggtcaagg	IGHV8-11*01	18	18	100	IGHD2-4*01	12	12	100	IGHJ4*01	24	25	96	55	54	0.981818
2	aactactgtgctcgacattatgattacgacggaggagatgctatagactactggggtcaagg	IGHV8-11*01	14	14	100	IGHD2-4*01	12	12	100	IGHJ4*01	24	25	96	51	50	0.980392
2	catactactgtgctcgacattatgattacgacggaggagatgctatggactactggggccaggg	IGHV8-11*01	17	17	100	IGHD2-4*01	12	12	100	IGHJ4*01	23	25	92	54	52	0.962963
2	catactactgtgctcgacattatgattacgacggaggagatactatggactactggggccaagg	IGHV8-11*01	17	17	100	IGHD2-4*01	12	12	100	IGHJ4*01	23	25	92	54	52	0.962963
1	atactactgtgctcgacattatgattacggcggaggggatgctatggactactggggccaagg	IGHV8-11*01	16	16	100	IGHD2-4*01	10	10	100	IGHJ4*01	24	25	96	51	50	0.980392
1	atactactgtgctcgacattaggattacggcggaggagatgctatggactactggggccaagg	IGHV8-11*01	16	16	100	IGHD2-4*01	9	10	90	IGHJ4*01	24	25	96	51	49	0.960784
1	actactgtgctcgacattatgattacgacgggggagatgctattgactactggggccaagg	IGHV8-11*01	14	14	100	IGHD2-4*01	12	12	100	IGHJ4*01	23	25	92	51	49	0.960784
1	catactactgtgctcgatattatgattacgacggaggagatgctatggatactggggtcaagg	IGHV8-11*01	17	17	100	IGHD2-4*01	14	15	93.3	IGHJ4*01	24	25	96	57	55	0.964912
1	aactactgtgctcgacattaggattacgacggaggagatgctatggactactggggccaagg	IGHV8-11*01	14	14	100	IGHD2-4*01	11	12	91.7	IGHJ4*01	24	25	96	51	49	0.960784
1	atactactgtgctcgacattatgattacgacggaggagatgctatggacaactgggtccaagg	IGHV8-11*01	16	16	100	IGHD2-4*01	12	12	100	IGHJ4*01	22	25	88	53	50	0.943396
1	actactgtgctcgacactatgattacgacggaggagatgctatggactactggggtcaagg	IGHV8-11*01	14	14	100	IGHD2-4*01	14	14	100	IGHJ4*01	25	25	100	53	53	1
1	atactactgtgctcgacattaggattacgacggaggagatgctatggactactggagccaagg	IGHV8-11*01	16	16	100	IGHD2-4*01	11	12	91.7	IGHJ4*01	23	25	92	53	50	0.943396
1	actactgtgctcgacattatgattacgccggaggagatgctattgactactggggccaagg	IGHV8-11*01	14	14	100	IGHD2-4*01	10	10	100	IGHJ4*01	23	25	92	49	47	0.959184
1	actactgtgctcgacattatgattacgccggaggagatgctatggactactggggccaagg	IGHV8-11*01	14	14	100	IGHD2-4*01	10	10	100	IGHJ4*01	24	25	96	49	48	0.979592
1	gctgccacatactactgtgctcgacattatgattacgacggaggagatgctatggactactggggtcaaag	IGHV8-11*01	23	23	100	IGHD2-4*01	12	12	100	IGHJ4*01	23	23	100	58	58	1
1	atactactgtgctcgacattatgattacaacggaggagatgctatggactactggggccaagg	IGHV8-11*01	16	16	100	IGHD2-4*01	11	12	91.7	IGHJ4*01	24	25	96	53	51	0.962264
1	atactactgtgctcgacattatgattacgacggaggagatgctatggatactggggtcaagg	IGHV8-11*01	16	16	100	IGHD2-4*01	12	12	100	IGHJ4*01	24	25	96	53	52	0.981132
1	atactactgtgctcgacattaggattacgacggagcagatgctatggactactggggccaagg	IGHV8-11*01	16	16	100	IGHD2-4*01	11	12	91.7	IGHJ4*01	24	25	96	53	51	0.962264
1	gccacatactactgtgctcgacattatgattacgacggaggagatgctatggactactggggtcgagg	IGHV8-11*01	21	21	100	IGHD2-4*01	12	12	100	IGHJ4*01	24	25	96	58	57	0.982759
1	gactactgtgctcgacattctgattacgacggaggagatgctagggactactggggccaagg	IGHV8-11*01	14	14	100	IGHD2-4*01	10	10	100	IGHJ4*01	23	25	92	49	47	0.959184
1	actactgtgctcgacattatgattacgacggaggatatgctatggactactggggccaagg	IGHV8-11*01	14	14	100	IGHD2-4*01	12	12	100	IGHJ4*01	25	26	96.2	52	51	0.980769
1	atactactgttctcggcattatgattacgacggaggagatgctatggactactggggccaagg	IGHV8-11*01	14	15	93.3	IGHD2-4*01	12	12	100	IGHJ4*01	24	25	96	52	50	0.961538
1	actactgtgctcgacattatgattacgacggaggagatgctagggactactggggccaagg	IGHV8-11*01	14	14	100	IGHD2-4*01	12	12	100	IGHJ4*01	23	25	92	51	49	0.960784
1	aagtactgtgctcgacattatgattacgacggaggagatgctatggactactggggccaaga	IGHV8-11*01	12	12	100	IGHD2-4*01	12	12	100	IGHJ4*01	23	24	95.8	48	47	0.979167
1	atactactgtactcgacattatgattacgacggaggagatgctatggactactggggccaagg	IGHV8-11*01	15	16	93.8	IGHD2-4*01	12	12	100	IGHJ4*01	24	25	96	53	51	0.962264
1	actgccacatactactgtgctcgacattatgattacgacggaggagatgctattgactactggggccaaga	IGHV8-11*01	24	24	100	IGHD2-4*01	12	12	100	IGHJ4*01	22	24	91.7	60	58	0.966667
1	actactgtgctcgacattatgattacgacggtggagatgctatggactactggggtcaagg	IGHV8-11*01	14	14	100	IGHD2-4*01	12	12	100	IGHJ4*01	25	25	100	51	51	1
1	ccacatactactgtgctcgacattatgattacgacggaggagatgctattgtctactggggccaagg	IGHV8-11*01	20	20	100	IGHD2-4*01	12	12	100	IGHJ4*01	22	25	88	57	54	0.947368
1	cactactgtgctcgacatcatgattacgacggaggagatgctatggactactggggccaagg	IGHV8-11*01	14	14	100	IGHD2-4*01	11	11	100	IGHJ4*01	24	25	96	50	49	0.98
1	atactactgtgctcgacattatgattccgacggaggagatgctatggactactggggccaagg	IGHV8-11*01	16	16	100	IGHD2-4*01	11	12	91.7	IGHJ4*01	24	25	96	53	51	0.962264
1	atcctactgtgctcgacattatgattacgacggaggagatgctatggactactggggccaagg	IGHV8-11*01	15	16	93.8	IGHD2-4*01	12	12	100	IGHJ4*01	24	25	96	53	51	0.962264
1	actgccacacactactgtgctcgacattatgattacgacggaggagatgctatggactactggggtcaagg	IGHV8-11*01	23	24	95.8	IGHD2-4*01	12	12	100	IGHJ4*01	25	25	100	61	60	0.983607
1	actactgtgctcgacattatgattacgacggaggagatgctatggactactgaggtcaagg	IGHV8-11*01	14	14	100	IGHD2-4*01	12	12	100	IGHJ4*01	24	25	96	51	50	0.980392
1	atactactgtgctcgacattaggattacgacggaggagatgctatgggctactggggccaagg	IGHV8-11*01	16	16	100	IGHD2-4*01	11	12	91.7	IGHJ4*01	23	25	92	53	50	0.943396
1	tccacatactactgtgctcgacattatgattacgacggaggagatgctatggactactggggtcaagg	IGHV8-11*01	20	20	100	IGHD2-4*01	12	12	100	IGHJ4*01	25	25	100	57	57	1
1	atactactgtgctcgacattatgattacgacggaggagatgctatggactactggggccacgg	IGHV8-11*01	16	16	100	IGHD2-4*01	12	12	100	IGHJ4*01	23	25	92	53	51	0.962264
1	actactgtgctcgacattatgattacgacggaggagatgctagggactactggggtcaagg	IGHV8-11*01	14	14	100	IGHD2-4*01	12	12	100	IGHJ4*01	24	25	96	51	50	0.980392
1	gccgcatactactgtgctcgacattatgattacgacggaggagatgctatggactactggggtcaagg	IGHV8-11*01	20	21	95.2	IGHD2-4*01	12	12	100	IGHJ4*01	25	25	100	58	57	0.982759
1	atactactgtgctcgacatgatgattacgacggaggagatgctatggacgactggggccaagg	IGHV8-11*01	16	16	100	IGHD2-4*01	11	11	100	IGHJ4*01	23	25	92	52	50	0.961538
1	atactactgtgctcgacattatgattacgacggaggagatgttatggactactggggccaagg	IGHV8-11*01	16	16	100	IGHD2-4*01	12	12	100	IGHJ4*01	23	25	92	53	51	0.962264
1	gctactgtgctcgacattaggattacgacggaggagatgctatggactactggggccaagg	IGHV8-11*01	13	13	100	IGHD2-4*01	11	12	91.7	IGHJ4*01	24	25	96	50	48	0.96
1	gccacatactactgtgctcgacattatgattacgacggaggagatgctatggactactggggtccaagg	IGHV8-11*01	21	21	100	IGHD2-4*01	12	12	100	IGHJ4*01	21	21	100	54	54	1
1	atactactgtgctcgacattatgattacgacggaggagatgctacggactactggggccaagg	IGHV8-11*01	16	16	100	IGHD2-4*01	12	12	100	IGHJ4*01	23	25	92	53	51	0.962264
1	tgccacgtactactgtgctcgacattatgattacgacggaggagatgctatggactactggggtcaagg	IGHV8-11*01	21	22	95.5	IGHD2-4*01	12	12	100	IGHJ4*01	25	25	100	59	58	0.983051
1	accactgtgctcgacattatgattacgacggaggagatgctattgactactggggccaagg	IGHV8-11*01	13	14	92.9	IGHD2-4*01	12	12	100	IGHJ4*01	23	25	92	51	48	0.941176
1	ggcaaaaactactgtgctcgacattatgattacgacggaggagatgctatggactactggggtcaagg	IGHV8-11*01	17	19	89.5	IGHD2-4*01	12	12	100	IGHJ4*01	25	25	100	56	54	0.964286
1	actactgtgctcgacattatgattacggcggaggagatgctattgactactggggccaagg	IGHV8-11*01	14	14	100	IGHD2-4*01	10	10	100	IGHJ4*01	23	25	92	49	47	0.959184
1	actactgtgctcgacattatgattacgacggtggagatgctatggactactggggccaagg	IGHV8-11*01	14	14	100	IGHD2-4*01	12	12	100	IGHJ4*01	24	25	96	51	50	0.980392
1	atactactgtgctcgacattatgataacgacggaggagatgctatggactactggggccaagg	IGHV8-11*01	16	16	100	IGHD2-4*01	11	12	91.7	IGHJ4*01	24	25	96	53	51	0.962264
1	gtactactgtgctcgacattatgattacgacggaggagatgctattgactactggggccaagg	IGHV8-11*01	15	15	100	IGHD2-4*01	12	12	100	IGHJ4*01	23	25	92	52	50	0.961538
1	atactactgtgctcgacattatgattgcgacggaggagatgctatggactactggggccaagg	IGHV8-11*01	16	16	100	IGHD2-4*01	11	12	91.7	IGHJ4*01	24	25	96	53	51	0.962264
1	atactactttgctcgacattatgattacgacggaggagatgctatggactactggggccaagg													0	0	#NUM!
1	actactgttctcgacattatgattacgacggaggatatgctatggactactggggccaagg													0	0	#NUM!
1	atactactgtgctcgacattatgatcacggcggaggagatgctatggactactggggccaagg	IGHV8-11*01	16	16	100	IGHD2-4*01	9	10	90	IGHJ4*01	24	25	96	51	49	0.960784
1	gccacatactactgtgctcgacattatgattacgacggaggaggtgctatggactactggggtcaagg	IGHV8-11*01	21	21	100	IGHD2-4*01	12	12	100	IGHJ4*01	24	24	100	57	57	1
1	atactactgtgctcgacattatgattacgacggaggagatgctatggactactgggtccaagg	IGHV8-11*01	16	16	100	IGHD2-4*01	12	12	100	IGHJ4*01	23	25	92	53	51	0.962264
1	gccaaatactactgtgctcgacattatgattacgacggaggagatgctattgactactggggccaagg	IGHV8-11*01	20	21	95.2	IGHD2-4*01	12	12	100	IGHJ4*01	23	25	92	58	55	0.948276
1	atactactgtgctcgacattaggattacgaccgaggagatgctatggactactggggccaagg	IGHV8-11*01	16	16	100	IGHD2-4*01	11	12	91.7	IGHJ4*01	24	25	96	53	51	0.962264
1	atactactgtgctcgacattatgattacgacggaggagatgctatggactagtggggccaagg	IGHV8-11*01	16	16	100	IGHD2-4*01	12	12	100	IGHJ4*01	23	25	92	53	51	0.962264
1	atactactgtgctcgacattatgattacgacggaggagatgctatggaccactggggccaagg	IGHV8-11*01	16	16	100	IGHD2-4*01	12	12	100	IGHJ4*01	23	25	92	53	51	0.962264
1	actactgtgctcgacataatgattacgacggaggagatgctatggactactggggccaagg	IGHV8-11*01	14	14	100	IGHD2-4*01	11	11	100	IGHJ4*01	24	25	96	50	49	0.98
1	gccacatactactgtgctcgacattatgattacgacggaggagatgctatgaactactggggtcaagg	IGHV8-11*01	21	21	100	IGHD2-4*01	12	12	100	IGHJ4*01	24	25	96	58	57	0.982759
1	atactactgtgctcgacactatgattacgacggaggagatgctattgactactggggccaagg	IGHV8-11*01	16	16	100	IGHD2-4*01	14	14	100	IGHJ4*01	23	25	92	55	53	0.963636
1	actactgtgctcgacattatgattacgacggaggggatgctattgactactggggccaagg	IGHV8-11*01	14	14	100	IGHD2-4*01	12	12	100	IGHJ4*01	23	25	92	51	49	0.960784
1	atactactgtgctcgacattaggattacgacggaggagatgctattgactactggggccaagg	IGHV8-11*01	16	16	100	IGHD2-4*01	11	12	91.7	IGHJ4*01	23	25	92	53	50	0.943396
1	actactgtgctcgacattatgattacgacggaggagatgcaatggactactggggccaagg	IGHV8-11*01	14	14	100	IGHD2-4*01	12	12	100	IGHJ4*01	23	25	92	51	49	0.960784
1	gccacatactactgtgctcgacattatgattacgacggaggagatgcaatggactactggggtcaagg	IGHV8-11*01	21	21	100	IGHD2-4*01	12	12	100	IGHJ4*01	24	25	96	58	57	0.982759
1	aactactgtgctcgacattatgattacgacggaggagatgctatggactactggggccaaga	IGHV8-11*01	14	14	100	IGHD2-4*01	12	12	100	IGHJ4*01	23	24	95.8	50	49	0.98
1	cactactgtgctcgacattatgattacgacggaggagatgctattgactactggggccaagg	IGHV8-11*01	14	14	100	IGHD2-4*01	12	12	100	IGHJ4*01	23	25	92	51	49	0.960784
1	atactactgtgctcgacattatgattacgacggagaagatgctatggactactggggccaagg	IGHV8-11*01	16	16	100	IGHD2-4*01	12	12	100	IGHJ4*01	24	25	96	53	52	0.981132

## Sheet: MBC_3
Subclone size (number of UMIs)	Sequence	V allele	V match (bp)	V length (bp)	V identity (% of germline)	D allele	D match (bp)	D length (bp)	D identity (% of germline)	J allele	J match (bp)	J length (bp)	J identity (% of germline)	Total length (bp)	Total match (bp)	Total identity (% of germline)
2383	catgcaactcagcagcctgacatctgaggactctgcggtctattactgtggtaactgactactggggccaaggcgtgtatc	IGHV1-64*01	50	50	100	IGHD2-1*01	5	5	100	IGHJ2*01	19	19	100	74	74	1
1229	catgcaactcagcagcctgacatctgaggactctgcggtctattactgtggtaactgcttactggggccaaggcgtgtatc	IGHV1-64*01	50	50	100	IGHD2-1*01	6	6	100	IGHJ2*01	15	15	100	71	71	1
257	atgcaactcagcagcctgacatctgaggactctgcggtctattactgtggtaactgactactggggccaaggtctctatcg	IGHV1-64*01	49	49	100	IGHD2-1*01	5	5	100	IGHJ2*01	18	18	100	72	72	1
148	atgcaactcagcagcctgacatctgaggactctgcggtctattactgtggtaactgcttactggggccaaggtctcta	IGHV1-64*01	49	49	100	IGHD2-1*01	6	6	100	IGHJ2*01	14	14	100	69	69	1
130	catgcaactcagcagcctgacatctgaggactctgcggtctattactgtggtaactgattactggggccaaggcgtgtatc	IGHV1-64*01	50	50	100	IGHD2-1*01	5	5	100	IGHJ2*01	18	19	94.7	74	73	0.986486
125	atgcaactcagcagcctgacatctgaggactctgcggtctattactgtggtaacggactactggggtcaaggcgtgtatc	IGHV1-64*01	49	49	100	IGHD2-1*01	5	5	100	IGHJ2*01	17	18	94.4	72	71	0.986111
80	catgcaactcagcagcctgacatctgaggactctgcggtctattactgtggtaactgactactggggtcaaggcgtgtatc	IGHV1-64*01	50	50	100	IGHD2-1*01	5	5	100	IGHJ2*01	18	19	94.7	74	73	0.986486
59	atgcaactcagcagcctgacatctgaggactctgcggtctattactgtggtaactgactactggggccaaggtgtgtatc	IGHV1-64*01	49	49	100	IGHD2-1*01	5	5	100	IGHJ2*01	18	18	100	72	72	1
42	atgcaactcagcagcctgacatctgaggactctgcggtctattactgtggtaactgactactggggccaagggcgcgatcg	IGHV1-64*01	49	49	100	IGHD2-1*01	5	5	100	IGHJ2*01	18	18	100	72	72	1
23	gcaactcagcagcctgacatctgaggactctgcggtctattactgtggtaactgattactggggccaaggtgtgtatc	IGHV1-64*01	47	47	100	IGHD2-1*01	5	5	100	IGHJ2*01	17	18	94.4	70	69	0.985714
23	gcaactcagcagcctgacatctgaggactctgcggtctattactgtggtaactgactactggggccaaggaaggaatcgat	IGHV1-64*01	47	47	100	IGHD2-1*01	5	5	100	IGHJ2*01	18	18	100	70	70	1
22	atgcaactcagcagcctgacatctgaggactctgcggtctattactgtggtaactgcttactggggccaaggtgtgtatc	IGHV1-64*01	49	49	100	IGHD2-1*01	6	6	100	IGHJ2*01	14	14	100	69	69	1
21	cagctcagcagcctgacatctgaggactctgcggtctattactgtggtaactgcttactggggccaagggcgcgatcg	IGHV1-64*01	45	46	97.8	IGHD2-1*01	6	6	100	IGHJ2*01	14	14	100	66	65	0.984848
17	cagcagcctgacatctgaggactctgcggtctattactgtggtaactgcttactggggccaaggcatgtatc	IGHV1-64*01	41	41	100	IGHD2-1*01	6	6	100	IGHJ2*01	16	16	100	63	63	1
14	cagcagcctgacatctgaggactctgcggtctattactgtggtaactgactactggggccaaggcgtgtatgg	IGHV1-64*01	41	41	100	IGHD2-1*01	5	5	100	IGHJ2*01	19	19	100	65	65	1
14	cagcagcctgacatctgaggactctgcggtctattactgtggtaactgattactggggtcaaggcgtgtatc	IGHV1-64*01	41	41	100	IGHD2-1*01	5	5	100	IGHJ2*01	17	19	89.5	65	63	0.969231
14	actcagcagcctgacatctgaggactctgcggtctattactgtggtaactgactactggggccaaggcgcgatcg	IGHV1-64*01	44	44	100	IGHD2-1*01	5	5	100	IGHJ2*01	19	19	100	68	68	1
14	cagcagcctgacatctgaggactctgcggtctattactgtggtaactgcttactggggccaaggtaacgatcgat	IGHV1-64*01	41	41	100	IGHD2-1*01	6	6	100	IGHJ2*01	14	14	100	61	61	1
12	cagcagcctgacatctgaggactctgcggtctattactgtggtaactgcttactggggtcaaggcgtgtatcg	IGHV1-64*01	41	41	100	IGHD2-1*01	6	6	100	IGHJ2*01	14	15	93.3	62	61	0.983871
9	atgcaactcagcagcctgacatctgaggactctgcggtctattactgtggtaactgcttactggggccaaggcgtgtat	IGHV1-64*01	49	49	100	IGHD2-1*01	6	6	100	IGHJ2*01	15	15	100	70	70	1
9	aactcagcagcctgacatctgaggactctgcggtctattactgtggtaactgactactggggccaaggcgttatc	IGHV1-64*01	45	45	100	IGHD2-1*01	5	5	100	IGHJ2*01	19	19	100	69	69	1
9	cagcagcctgacatctgaggactctgcggtctattactgtggtaactgcttactggggccaaggaaggaatcgat	IGHV1-64*01	41	41	100	IGHD2-1*01	6	6	100	IGHJ2*01	14	14	100	61	61	1
9	cagcagcccgacatctgaggactctgcggtctattactgtggtaactgcttactggggccaaggcgtgtatc	IGHV1-64*01	40	41	97.6	IGHD2-1*01	6	6	100	IGHJ2*01	15	15	100	62	61	0.983871
9	caactcagcagcctgacatctgaggactctgcggtctattactgtggtaactgactactggggccaaggcgtgaatcgat	IGHV1-64*01	46	46	100	IGHD2-1*01	5	5	100	IGHJ2*01	19	19	100	70	70	1
8	caactcagcagcctgacatctgaggactctgcggtctattactgtggtaactgactactggggccaaggtctgtatc	IGHV1-64*01	46	46	100	IGHD2-1*01	5	5	100	IGHJ2*01	18	18	100	69	69	1
8	cagcagcctgacatctgaggactctgcggtctattactgtggtaactgactactggggccaaggcatgtatcgat	IGHV1-64*01	41	41	100	IGHD2-1*01	5	5	100	IGHJ2*01	20	20	100	66	66	1
8	gcaactcagcagcctgacatctgaggactctgcggtctattactgtggtaactgactactggggccaaggggtgtatcg	IGHV1-64*01	47	47	100	IGHD2-1*01	5	5	100	IGHJ2*01	18	18	100	70	70	1
8	atgcaactcagcagcctgacatctgaggactctgcggtctattactgtggtaactgcttactggggccaaggcaagtatc	IGHV1-64*01	49	49	100	IGHD2-1*01	6	6	100	IGHJ2*01	16	16	100	71	71	1
7	cagcagcccgacatctgaggactctgcggtctattactgtggtaactgactactggggccaaggcgtgtatc	IGHV1-64*01	40	41	97.6	IGHD2-1*01	5	5	100	IGHJ2*01	19	19	100	65	64	0.984615
6	cagcagcctgacatctgaggactctgcggtctattactgtggtaactgactactggggcacaggcgtgtatc	IGHV1-64*01	41	41	100	IGHD2-1*01	5	5	100	IGHJ2*01	17	19	89.5	65	63	0.969231
6	cagcagcctgacatctgaggactctgcggtctattactgtggtaacggactactggggtcaaggtctctatcg	IGHV1-64*01	41	41	100	IGHD2-1*01	5	5	100	IGHJ2*01	16	17	94.1	63	62	0.984127
5	actcagcagcctgacatctgaggactctgcggtctattactgtggtaactgcttactggggccaaggtact	IGHV1-64*01	44	44	100	IGHD2-1*01	6	6	100	IGHJ2*01	16	17	94.1	67	66	0.985075
5	aactcagcagcctgacatctgaggactctgcggtctattactgtggtaactgattactggggccaaggtctctatc	IGHV1-64*01	45	45	100	IGHD2-1*01	5	5	100	IGHJ2*01	17	18	94.4	68	67	0.985294
5	cagcagcctgacatctgaggactctgcggtctattactgtggtaactgactactggggccaaggcaaggatcg	IGHV1-64*01	41	41	100	IGHD2-1*01	5	5	100	IGHJ2*01	20	20	100	66	66	1
5	actcagcagcctgacatctgaggactctgcggtctattactgtggtaactgcttactggggccaaggcgtg	IGHV1-64*01	44	44	100	IGHD2-1*01	6	6	100	IGHJ2*01	15	15	100	65	65	1
5	gcaactcagcagcctgacatctgaggactctgcggtctattactgtggtaactgcttactggggccaaggtaagt	IGHV1-64*01	47	47	100	IGHD2-1*01	6	6	100	IGHJ2*01	14	14	100	67	67	1
4	cgactcagcagcctgacatctgaggactctgcggtctattactgtggtaactgactactggggccaagggc	IGHV1-64*01	44	44	100	IGHD2-1*01	5	5	100	IGHJ2*01	18	18	100	67	67	1
4	agcagcctgacatctgaggactctgcggtctattactgtggtagctgcttactggggccaaggcgtgtatc	IGHV1-64*01	40	40	100					IGHJ2*01	15	15	100	55	55	1
4	acatgcaactcagcagcctgacatctgaggactctgcggtctattactgtggtaactgactactggggccaggccaagg	IGHV1-64*01	51	51	100	IGHD2-1*01	5	5	100	IGHJ2*01	18	20	90	76	74	0.973684
4	cagcagcctgacatctgaggactctgcggtctattactgtggtaactgcttactggggccaaggcgcgatcg	IGHV1-64*01	41	41	100	IGHD2-1*01	6	6	100	IGHJ2*01	15	15	100	62	62	1
4	atgcaactcagcagcctgacatctggggactctgcggtctattactgtggtaactgactactggggccaaggcgtgtatc	IGHV1-64*01	48	49	98	IGHD2-1*01	5	5	100	IGHJ2*01	19	19	100	73	72	0.986301
3	agcagcctgacatctgagggctctgcggtctattactgtggtaactgactactggggccaaggcgtgtatc	IGHV1-64*01	39	40	97.5	IGHD2-1*01	5	5	100	IGHJ2*01	19	19	100	64	63	0.984375
3	cgcagcctgacatctgaggactctgcagtctattactgtggtaactgactactggggccaaggcgtgtatc	IGHV1-64*01	38	39	97.4	IGHD2-1*01	5	5	100	IGHJ2*01	19	19	100	63	62	0.984127
3	cagcagcctgacatctgaggactctgcggtctattactgtggtaactgactactggggccaaggcgtgaatg	IGHV1-64*01	41	41	100	IGHD2-1*01	5	5	100	IGHJ2*01	19	19	100	65	65	1
3	agcagcctgacatctgaggactctgcggtctgttactgtggtaactgactactggggccaaggcgtgtatcgat	IGHV1-64*01	39	40	97.5	IGHD2-1*01	5	5	100	IGHJ2*01	19	19	100	64	63	0.984375
3	cagcggcctgacatctgaggactctgcggtctattactgtggtaactgactactggggccaaggcgtgtatc	IGHV1-64*01	40	41	97.6	IGHD2-1*01	5	5	100	IGHJ2*01	19	19	100	65	64	0.984615
3	actcagcagcctgacatctgaggactctgcggtctattactgtggtaactgcttactggggccaaggtctc	IGHV1-64*01	44	44	100	IGHD2-1*01	6	6	100	IGHJ2*01	14	14	100	64	64	1
3	agcagcctgacatctgaggactctgcggtctattattgtggtaactgcttactggggccaaggcgtgtatcg	IGHV1-64*01	39	40	97.5	IGHD2-1*01	6	6	100	IGHJ2*01	15	15	100	61	60	0.983607
3	caactcagcagcctgacatctgaggactctgcggtctattactgtggtaactgcttactggggccaaggcaaggatc	IGHV1-64*01	46	46	100	IGHD2-1*01	6	6	100	IGHJ2*01	16	16	100	68	68	1
3	agcagcctgacatctgaggactctgcggtctactactgtggtaactgactactggggccaaggcgtgtatc	IGHV1-64*01	39	40	97.5	IGHD2-1*01	5	5	100	IGHJ2*01	19	19	100	64	63	0.984375
3	gcaactcagcagcctgacatctgaggactctgcggtctattactgtggtaactgactactggggtcaaggtctct	IGHV1-64*01	47	47	100	IGHD2-1*01	5	5	100	IGHJ2*01	17	18	94.4	70	69	0.985714
3	cagcagcctgacatctgaggactctgtggtctattactgtggtaactgactactggggccaaggcgtgtatc	IGHV1-64*01	40	41	97.6	IGHD2-1*01	5	5	100	IGHJ2*01	19	19	100	65	64	0.984615
3	gcaactcagcagcctgacatctgaggactctgcggtctattactgtggtaactgcttactggggccaaggggtgtatcg	IGHV1-64*01	47	47	100	IGHD2-1*01	6	6	100	IGHJ2*01	14	14	100	67	67	1
3	cagcagcctgacatctgaggactctgcggtctattactgtggtaactgactactggggccaaggtaggaatcgat	IGHV1-64*01	41	41	100	IGHD2-1*01	5	5	100	IGHJ2*01	18	18	100	64	64	1
3	cagcagcctgacatctgaggactctgcggtctattactgcggtaactgactactggggccaaggcgtgtatc	IGHV1-64*01	39	39	100	IGHD2-1*01	6	6	100	IGHJ2*01	19	19	100	64	64	1
3	aacagcctgacatctgaggactctgcggtctattactgtggtaactgactactggggccaaggcgtgtatc	IGHV1-64*01	38	38	100	IGHD2-1*01	5	5	100	IGHJ2*01	19	19	100	62	62	1
3	gcaactcagcagcctgacatctgaggactctgcggtctattactgtggtaactgcttactggggccaaggcgttgtatc	IGHV1-64*01	47	47	100	IGHD2-1*01	6	6	100	IGHJ2*01	15	15	100	68	68	1
3	caactcagcagcctgacatctgaggactctgcggtctattactgtggtaactgactactggggccaaggcctgtatc	IGHV1-64*01	46	46	100	IGHD2-1*01	5	5	100	IGHJ2*01	19	19	100	70	70	1
3	agcagcctgacatctgaggactctgcggtccattactgtggtaactgcttactggggccaaggcgtgtatc	IGHV1-64*01	39	40	97.5	IGHD2-1*01	6	6	100	IGHJ2*01	15	15	100	61	60	0.983607
2	agcagcctgacatctaaggactctgcggtctattactgtggtaactgactactggggccaaggcgtgtatc	IGHV1-64*01	39	40	97.5	IGHD2-1*01	5	5	100	IGHJ2*01	19	19	100	64	63	0.984375
2	actcagcagcctgacatctgaggactctgcgatctattactgtggtaactgcttactggggccaaggcgtgtatc	IGHV1-64*01	43	44	97.7	IGHD2-1*01	6	6	100	IGHJ2*01	15	15	100	65	64	0.984615
2	cagcatcctgacatctgaggactctgcggtctattactgtggtaactgactactggggccaaggcgtgtatc	IGHV1-64*01	40	41	97.6	IGHD2-1*01	5	5	100	IGHJ2*01	19	19	100	65	64	0.984615
2	cagcagcctgacatctgaggactctgcggtctattactgtggtgactgcttactggggccaaggcgtgtatc	IGHV1-64*01	41	41	100					IGHJ2*01	15	15	100	56	56	1
2	cagcagcctgacatctgaggactctgcggtctattactgtggtaactgactctggggccaaggcgtgtatcc	IGHV1-64*01	41	41	100	IGHD2-1*01	6	6	100	IGHJ2*01	13	13	100	60	60	1
2	cagcagcctgacatctgaggactctgcggtctattactgtggtaactgattactggggccaaggaatgaatcgat	IGHV1-64*01	41	41	100	IGHD2-1*01	5	5	100	IGHJ2*01	17	18	94.4	64	63	0.984375
2	caactcagcagcctgacatctgaggactctgcggtctattactgtggtaactgcttactggggccaaggtatgtatc	IGHV1-64*01	46	46	100	IGHD2-1*01	6	6	100	IGHJ2*01	14	14	100	66	66	1
2	cagcagcctgacatctgaggactctgcggtctattattgtggtaactgcttactggggccaaggtctctatc	IGHV1-64*01	40	41	97.6	IGHD2-1*01	6	6	100	IGHJ2*01	14	14	100	61	60	0.983607
2	agcagcctgacatctgaggactctgcggtctattactgtggtaactgattactggggccaaggggtgtatcg	IGHV1-64*01	40	40	100	IGHD2-1*01	5	5	100	IGHJ2*01	17	18	94.4	63	62	0.984127
2	gcaactcagcagtctgacatctgaggactctgcggtctattactgtggtaactgactactggggccaaggcgtgtatc	IGHV1-64*01	46	47	97.9	IGHD2-1*01	5	5	100	IGHJ2*01	19	19	100	71	70	0.985915
2	agcagcctgacatctgaggactctgcggtctattactgtggcaactgactactggggccaaggcgtgtatc	IGHV1-64*01	40	40	100					IGHJ2*01	19	19	100	59	59	1
2	cagcagcctgacatctgaggactctgcggtctattactgtggtaactgactactggggccaaggaatgaatcgat	IGHV1-64*01	41	41	100	IGHD2-1*01	5	5	100	IGHJ2*01	18	18	100	64	64	1
2	cagcagcctgacatctgaggactctgcggtctattactgtggtaactgcttactggggccaaggaatgtatcgat	IGHV1-64*01	41	41	100	IGHD2-1*01	6	6	100	IGHJ2*01	14	14	100	61	61	1
2	agcagcctgacatctgaggactctgcggtctattactgtggtaactgactactggggtcaagggcgcgatcg	IGHV1-64*01	40	40	100	IGHD2-1*01	5	5	100	IGHJ2*01	17	18	94.4	63	62	0.984127
2	cagcagcctgacatctgaggactctgcggtctattactgtggtaactgatactggggccaaggcgtgtatcc	IGHV1-64*01	41	41	100	IGHD2-1*01	6	6	100	IGHJ2*01	15	15	100	62	62	1
2	acatgcaactcagcagcctgacatctgaggactctgcggtctattactgtggtaactgattactggggccaaggtgtcta	IGHV1-64*01	51	51	100	IGHD2-1*01	5	5	100	IGHJ2*01	17	18	94.4	74	73	0.986486
2	cagcagcctgacatctgaggactctgcggtctattactgtggtaactgcttactggggtcaaggcatgtatc	IGHV1-64*01	41	41	100	IGHD2-1*01	6	6	100	IGHJ2*01	15	16	93.8	63	62	0.984127
2	agcagcctgacatctgaggactctgcggtctattacagtggtaactgactactggggccaaggcgtgtatc	IGHV1-64*01	39	40	97.5	IGHD2-1*01	5	5	100	IGHJ2*01	19	19	100	64	63	0.984375
2	atgcaactcagcagcctgacatctgaggactctgcggtctattactgtggtaactactactggggccaaggcgtgtatc	IGHV1-64*01	49	49	100	IGHD2-1*01	6	6	100	IGHJ2*01	17	17	100	72	72	1
2	cagcagcctgacatctgaggactctgcggtctattactgtggtaactgcttactgaggccaaggcgtgtatc	IGHV1-64*01	41	41	100	IGHD2-1*01	6	6	100	IGHJ2*01	14	15	93.3	62	61	0.983871
2	gcaactcagcagcctgacatctgaggactctgcggtctattactgtggtaacttactactggggccaaggcgtgtatc	IGHV1-64*01	47	47	100	IGHD2-1*01	6	6	100	IGHJ2*01	17	17	100	70	70	1
2	cagcagcctgacatctgaggactctgcggtctattactgtggtaactcttactggggccaaggcgtgtatcc	IGHV1-64*01	41	41	100	IGHD2-1*01	6	6	100	IGHJ2*01	15	15	100	62	62	1
2	cagcagcctgacatctgaggactctgcggtctattactgtggtaactgactactggggccaaggtaagtatc	IGHV1-64*01	41	41	100	IGHD2-1*01	5	5	100	IGHJ2*01	18	18	100	64	64	1
2	aactcagcagcctgacatctgaggactctgcggtctattactgtggtaactgactactggggccaaggtacgtatc	IGHV1-64*01	45	45	100	IGHD2-1*01	5	5	100	IGHJ2*01	20	21	95.2	71	70	0.985915
2	aactcagcagcctgacatctgaggactctgcggtctattactgtggtaactgcttactggggccaaggtacgtatc	IGHV1-64*01	45	45	100	IGHD2-1*01	6	6	100	IGHJ2*01	16	17	94.1	68	67	0.985294
2	cagcagcctgacatctgaggactctgcggtctattaccgtggtaactgcttactggggccaaggcgtgtatc	IGHV1-64*01	40	41	97.6	IGHD2-1*01	6	6	100	IGHJ2*01	15	15	100	62	61	0.983871
2	aactcagcagcctgacatctgaggactctgcggtctattactgtggtaactgactactggggtcaaggcatgtatc	IGHV1-64*01	45	45	100	IGHD2-1*01	5	5	100	IGHJ2*01	19	20	95	70	69	0.985714
2	cagcagcctgacatctgaggactctgcggtctattactgtggtaactgactactggggccaaggaatgtatcgat	IGHV1-64*01	41	41	100	IGHD2-1*01	5	5	100	IGHJ2*01	18	18	100	64	64	1
2	gcaactcagcagcctgacatctgaggactctgcggtctattactgtggtaactgactactggggccaaggcaagtatc	IGHV1-64*01	47	47	100	IGHD2-1*01	5	5	100	IGHJ2*01	20	20	100	72	72	1
2	agcagcctgacatctgtggactctgcggtctattactgtggtaactgactactggggccaaggcgtgtatc	IGHV1-64*01	39	40	97.5	IGHD2-1*01	5	5	100	IGHJ2*01	19	19	100	64	63	0.984375
2	cagcagcctgacacctgaggactctgcggtctattactgtggtaactgactactggggccaaggcgtgtatc	IGHV1-64*01	40	41	97.6	IGHD2-1*01	5	5	100	IGHJ2*01	19	19	100	65	64	0.984615
2	actcagcagcctgacatctgaggactctgcggtctattaccgtggtaactgactactggggccaaggcgtg	IGHV1-64*01	43	44	97.7	IGHD2-1*01	5	5	100	IGHJ2*01	19	19	100	68	67	0.985294
2	atgcaactcagcagcctgacatccgaggactctgcggtctattactgtggtaactgcttactggggccaaggcgtgtatc	IGHV1-64*01	48	49	98	IGHD2-1*01	6	6	100	IGHJ2*01	15	15	100	70	69	0.985714
2	cagcagcctgacatctgaggactctgcggtctattactgtggtaactgactactggggccaaggcgtgtac	IGHV1-64*01	41	41	100	IGHD2-1*01	5	5	100	IGHJ2*01	19	19	100	65	65	1
2	cagcagcctgacatctgaggactctgcggtctattactgtggtaactgcctactggggccaaggtctctatcg	IGHV1-64*01	41	41	100	IGHD2-1*01	5	5	100	IGHJ2*01	17	18	94.4	64	63	0.984375
2	agcagcctgacatctgaggaccctgcggtctattactgtggtaactgactactggggccaaggcgtgtatc	IGHV1-64*01	39	40	97.5	IGHD2-1*01	5	5	100	IGHJ2*01	19	19	100	64	63	0.984375
2	actcagcagcctgatatctgaggactctgcggtctattactgtggtaactgactactggggccaaggcgtgtatc	IGHV1-64*01	43	44	97.7	IGHD2-1*01	5	5	100	IGHJ2*01	19	19	100	68	67	0.985294
2	agcagcctgacatctgaggactctgcggtctattactgtggtaactgactactggggtcaaggtgtgtatc	IGHV1-64*01	40	40	100	IGHD2-1*01	5	5	100	IGHJ2*01	17	18	94.4	63	62	0.984127
2	cagcagcctgacatcagaggactctgcggtctattactgtggtatctgcttactggggccaaggcgtgtatc	IGHV1-64*01	40	41	97.6					IGHJ2*01	15	15	100	56	55	0.982143
2	actcagcagcctgacatctgaggactctgcggtctattactgtggtaactgactactggggccaaggcgtgaatc	IGHV1-64*01	44	44	100	IGHD2-1*01	5	5	100	IGHJ2*01	19	19	100	68	68	1
2	agcagcctgacatctgaggactctgcggtctattactgtggtatctgactactggggccaaggcgtgtatc	IGHV1-64*01	40	40	100					IGHJ2*01	19	19	100	59	59	1
1	agcagcctgacatctgaggactccgcggtctattactgtggtaactgcttactggggccaaggcgtgtatc	IGHV1-64*01	39	40	97.5	IGHD2-1*01	6	6	100	IGHJ2*01	15	15	100	61	60	0.983607
1	cagcagcctgacatctgaggactctgcggtctattactgtggtaactgattactggggccaaggtgtgtataagg	IGHV1-64*01	41	41	100	IGHD2-1*01	5	5	100	IGHJ2*01	17	18	94.4	64	63	0.984375
1	agcagcctgacatctgaggactctgcggtctattactgtggtaactgcttactggggccaatgcgtgtatc	IGHV1-64*01	40	40	100	IGHD2-1*01	6	6	100	IGHJ2*01	14	15	93.3	61	60	0.983607
1	cgtagcctgacatctgaggactctgcagtctattactgtggtaactgactactggggccaaggcgtgtatc	IGHV1-64*01	36	37	97.3	IGHD2-1*01	5	5	100	IGHJ2*01	19	19	100	61	60	0.983607
1	gcagcctgacatctgaggactctgcggtctattaccgtggtaactgactactggggccaagggcgcgatcg	IGHV1-64*01	38	39	97.4	IGHD2-1*01	5	5	100	IGHJ2*01	18	18	100	62	61	0.983871
1	caacagcctgacatctgaggactctgcggtctattactgtggtaactgcttactggggccaaggtctcta	IGHV1-64*01	40	41	97.6	IGHD2-1*01	6	6	100	IGHJ2*01	14	14	100	61	60	0.983607
1	cagcagcctgacatctgaggactctgtggtctattactgtggtaactgactactggggccaaggtctcta	IGHV1-64*01	40	41	97.6	IGHD2-1*01	5	5	100	IGHJ2*01	18	18	100	64	63	0.984375
1	cagcagcctgacatctgaggactctgcggtctattactgtggtaactgactactggggccaaggtctgtata	IGHV1-64*01	41	41	100	IGHD2-1*01	5	5	100	IGHJ2*01	18	18	100	64	64	1
1	cagcagcctgacatctgaggactctgcggtctattactgtggtaactgactactggggtcaaggcaaggatc	IGHV1-64*01	41	41	100	IGHD2-1*01	5	5	100	IGHJ2*01	19	20	95	66	65	0.984848
1	aactcagcagcctgacatctgagggctctgcggtctattactgtggtaactgcttactggggccaaggcgtgtatc	IGHV1-64*01	44	45	97.8	IGHD2-1*01	6	6	100	IGHJ2*01	15	15	100	66	65	0.984848
1	cagcagcctgacatctgatgactctgcggactattactgtggtaactgactactggggccaaggtctcta	IGHV1-64*01	39	41	95.1	IGHD2-1*01	5	5	100	IGHJ2*01	18	18	100	64	62	0.96875
1	atcagcctgacatctgaggactctgcggtctattactgtggtaactggctactgggtccaaggcgtgtatc	IGHV1-64*01	38	38	100	IGHD2-1*01	5	5	100	IGHJ2*01	17	19	89.5	62	60	0.967742
1	cagcagcctgacatctgaggactctgcggtctattactgtggtaactgactactggggccaaggcaagaatcgat	IGHV1-64*01	41	41	100	IGHD2-1*01	5	5	100	IGHJ2*01	20	20	100	66	66	1
1	actcagcagcctgacgtctgaggactctgcggtctattactgtggtaactgactactggggccaaggcgtgt	IGHV1-64*01	43	44	97.7	IGHD2-1*01	5	5	100	IGHJ2*01	19	19	100	68	67	0.985294
1	agcagcctgacatctgaggactctgcggtctattactgtggtaactgcttactagggccaaggcgtgtatc	IGHV1-64*01	40	40	100	IGHD2-1*01	6	6	100	IGHJ2*01	14	15	93.3	61	60	0.983607
1	cagcagcctgacatctgaggactctgcggtctattactgtggtaactgcttactggggccaaggcaagaatcgat	IGHV1-64*01	41	41	100	IGHD2-1*01	6	6	100	IGHJ2*01	16	16	100	63	63	1
1	agcagcctgacatctgaggactctgcggtctattactgtggtaactgactaatggggccaaggcgtgtatc	IGHV1-64*01	40	40	100	IGHD2-1*01	5	5	100	IGHJ2*01	18	19	94.7	64	63	0.984375
1	cagcagccagacatctgaggactctgcggtctattactgtggtaactgactactggggccaaggtctcta	IGHV1-64*01	40	41	97.6	IGHD2-1*01	5	5	100	IGHJ2*01	18	18	100	64	63	0.984375
1	agcagcctgacatctgaggactttgcggtctattactgtggtaactgactactggggtcaaggcgtgtatc	IGHV1-64*01	39	40	97.5	IGHD2-1*01	5	5	100	IGHJ2*01	18	19	94.7	64	62	0.96875
1	agcagcctgacatctgaggactctgcggtctattactgtggtaactgaatactggggccaaggcgtgtatc	IGHV1-64*01	40	40	100	IGHD2-1*01	5	5	100	IGHJ2*01	18	19	94.7	64	63	0.984375
1	aactcagcagcctgacatctgaggactctgcggtctattactgtggtaactgactactggggccaaggtctggatcgt	IGHV1-64*01	45	45	100	IGHD2-1*01	5	5	100	IGHJ2*01	18	18	100	68	68	1
1	cagcagcctgacatctgaggactctgcggtctattactgtggtaactgttactggggccaaggcgtgtatccg	IGHV1-64*01	41	41	100	IGHD2-1*01	6	6	100	IGHJ2*01	15	15	100	62	62	1
1	agcagcctggcatctgaggactctgcggtctattactgtggtaactgactactggggccaaggcgtgtatc	IGHV1-64*01	39	40	97.5	IGHD2-1*01	5	5	100	IGHJ2*01	19	19	100	64	63	0.984375
1	cagcagcctgacatctgaggactctgcggtctattactgtggtaactgactactggggccaaggcgagtatcg	IGHV1-64*01	41	41	100	IGHD2-1*01	5	5	100	IGHJ2*01	19	19	100	65	65	1
1	cagcagcctgacatctgaggactctgcggtctgttactgtggtaactgactactggggccaaggtctcta	IGHV1-64*01	40	41	97.6	IGHD2-1*01	5	5	100	IGHJ2*01	18	18	100	64	63	0.984375
1	accagcctgacatctgaggactctgcggtctattactgtggtaactgactactggggccaaggcgtgtatc	IGHV1-64*01	38	38	100	IGHD2-1*01	5	5	100	IGHJ2*01	19	19	100	62	62	1
1	gcaactcagcagcctgacatctgaggactctgcggtctattactgtggtaactgattactggggccaaggtatctatc	IGHV1-64*01	47	47	100	IGHD2-1*01	5	5	100	IGHJ2*01	17	18	94.4	70	69	0.985714
1	agcagcctgacatctgaggactctgcggtctattactgtggtaactgattactggggtcaaggaatgaatcgat	IGHV1-64*01	40	40	100	IGHD2-1*01	5	5	100	IGHJ2*01	16	18	88.9	63	61	0.968254
1	agcagcctgacatctgaggactccgcggtctattactgtggtaactgactactggggccaaggcgtgtatc	IGHV1-64*01	39	40	97.5	IGHD2-1*01	5	5	100	IGHJ2*01	19	19	100	64	63	0.984375
1	cagcagcctgacatctgaggactctgcggtctattactgtggtaactgactactggggccaaggtgtctatca	IGHV1-64*01	41	41	100	IGHD2-1*01	5	5	100	IGHJ2*01	18	18	100	64	64	1
1	actcagcagcctgacatctgaggactctgcggtctattactgtggtaactgcttactgggggccaaggcgtgtatc	IGHV1-64*01	44	44	100	IGHD2-1*01	6	6	100	IGHJ2*01	11	11	100	61	61	1
1	agcagcctgacatctgaggactctgcggtctattactgtggtaactgcttactggggccaaggaatgaatcgat	IGHV1-64*01	40	40	100	IGHD2-1*01	6	6	100	IGHJ2*01	14	14	100	60	60	1
1	cagcagcctgacatctgaggactctgcggtctattactgtggtaactgcttactggggccaagcgtgtatc	IGHV1-64*01	41	41	100	IGHD2-1*01	6	6	100	IGHJ2*01	13	13	100	60	60	1
1	cggcagcctgacatctgaggactctgcggtctattactgtggtaactgcttactggggccaaggcgtgtatc	IGHV1-64*01	39	39	100	IGHD2-1*01	6	6	100	IGHJ2*01	15	15	100	60	60	1
1	gcagcctgacatctgaggactctgcggtctattactgtggtaactgccttactggggccaaggcgtgtatc	IGHV1-64*01	39	39	100	IGHD2-1*01	6	6	100	IGHJ2*01	15	15	100	60	60	1
1	cagcagcctgacatctgaggactctgcggtctattactgtagtaactgcttactggggccaaggcgtgtatc	IGHV1-64*01	40	40	100	IGHD2-1*01	6	6	100	IGHJ2*01	15	15	100	61	61	1
1	atcagcctgacatctgaggactctgcggtctattactgtggtaactgactactggggccaaggcgtgtatc	IGHV1-64*01	38	38	100	IGHD2-1*01	5	5	100	IGHJ2*01	19	19	100	62	62	1
1	atgcaactcagcagcctgacatctcaggactctgcggtctattactgtggtaactgactactggggccaaggcgtgtatc	IGHV1-64*01	48	49	98	IGHD2-1*01	5	5	100	IGHJ2*01	19	19	100	73	72	0.986301
1	aactcagcagcctgacatctgaggactctgcggtctattactgtggtaactgcttactggggccaaggcgtc	IGHV1-64*01	45	45	100	IGHD2-1*01	6	6	100	IGHJ2*01	15	15	100	66	66	1
1	agcagccagacatctgaggactctgcggtctattactgtggtaactgactactggggccaaggcgtgtatc	IGHV1-64*01	39	40	97.5	IGHD2-1*01	5	5	100	IGHJ2*01	19	19	100	64	63	0.984375
1	aactcagcagcctgacatctgaggactctgcggtctattactgtggtagctgactactggggccaaggcgtgtatc	IGHV1-64*01	45	45	100					IGHJ2*01	19	19	100	64	64	1
1	agcagcctgacatctgaggactctgcggtctattactatggtaactgactactggggccaaggcgtgtatc	IGHV1-64*01	39	40	97.5	IGHD2-1*01	5	5	100	IGHJ2*01	19	19	100	64	63	0.984375
1	cagcagcctgacatctgaggactctgcggtctattactgtggtaactgcttactggggccaaggcctctatctcta	IGHV1-64*01	41	41	100	IGHD2-1*01	6	6	100	IGHJ2*01	20	24	83.3	71	67	0.943662
1	agcagcttgacatctgaggactctgcggtctattactgtggtaactgcttactggggccaaggcgtgtatc	IGHV1-64*01	39	40	97.5	IGHD2-1*01	6	6	100	IGHJ2*01	15	15	100	61	60	0.983607
1	gcaactcagcagcctgacatctgaggactctgcggtctattactgtggtaactgcttactggggccaagtcgtgtatc	IGHV1-64*01	47	47	100	IGHD2-1*01	6	6	100	IGHJ2*01	13	13	100	66	66	1
1	actcagcagcctgacatctgaggactctgcggtctattactgtggtaacggactactggggtcaaggcgtg	IGHV1-64*01	44	44	100	IGHD2-1*01	5	5	100	IGHJ2*01	17	18	94.4	67	66	0.985075
1	agcagcctgacatctgaggactctgcggtctattactgcggtaactgcttactggggacaaggcgtgtatc	IGHV1-64*01	38	38	100	IGHD2-1*01	7	7	100	IGHJ2*01	14	15	93.3	60	59	0.983333
1	gcagcctgacatctgaggactctgcggtctattactgtggtaactgactacctggggccaaggcgtgtatcat	IGHV1-64*01	39	39	100	IGHD2-1*01	6	6	100	IGHJ2*01	13	13	100	58	58	1
1	agcctgacatctgaggactctgcggtctattactgtggtaactgactactggggtcaaggaaggaatcgat	IGHV1-64*01	37	37	100	IGHD2-1*01	5	5	100	IGHJ2*01	17	18	94.4	60	59	0.983333
1	agcagcctgacatctgaggactctgcggtctattactgtggcaactgactactggggtcaaggcgtgtatc	IGHV1-64*01	40	40	100					IGHJ2*01	18	19	94.7	59	58	0.983051
1	cagcagcctgacatctgaggactctgcggtctattactgtggtaactgactactggggacaaggcgtgtatc	IGHV1-64*01	41	41	100	IGHD2-1*01	5	5	100	IGHJ2*01	18	19	94.7	65	64	0.984615
1	cagcagcctgacatctgaggactctgcggtccattactgtggtaactgactactggggccaaggtctctatc	IGHV1-64*01	40	41	97.6	IGHD2-1*01	5	5	100	IGHJ2*01	18	18	100	64	63	0.984375
1	cagcagcctgacatctgaggactctgcggtctgttactgtggtaactgactactggggtcaaggcgtgtatc	IGHV1-64*01	40	41	97.6	IGHD2-1*01	5	5	100	IGHJ2*01	18	19	94.7	65	63	0.969231
1	cagcagcctgacatctgaggactctgcggtctattactgtggtaactgcttactggggccaaggtgtctatc	IGHV1-64*01	41	41	100	IGHD2-1*01	6	6	100	IGHJ2*01	14	14	100	61	61	1
1	cagcagccagacatctgaggactctgcggtctattactgtggtaactgcttactggggccaaggcgtgtatc	IGHV1-64*01	40	41	97.6	IGHD2-1*01	6	6	100	IGHJ2*01	15	15	100	62	61	0.983871
1	agcagcctgacatctgaggaccctgcggtctattactgtggtaactgactactggggtcaaggcgtgtatc	IGHV1-64*01	39	40	97.5	IGHD2-1*01	5	5	100	IGHJ2*01	18	19	94.7	64	62	0.96875
1	agcagtctgacatctgaggactctgcggtctattactgtggtaactgactactggggtcaaggcgtgtatcg	IGHV1-64*01	39	40	97.5	IGHD2-1*01	5	5	100	IGHJ2*01	18	19	94.7	64	62	0.96875
1	agcctgacatctgaggactctgcggtctattactgtggtaactgcttactggggccatggaaggaatcgat	IGHV1-64*01	37	37	100	IGHD2-1*01	6	6	100	IGHJ2*01	13	14	92.9	57	56	0.982456
1	cagcagcctgacatctgaggactctgcggtctattactgtggtaactgacactggggccaaggcgtgtatcc	IGHV1-64*01	41	41	100	IGHD2-1*01	6	6	100	IGHJ2*01	14	14	100	61	61	1
1	cgcagccagacatctgaggactctgcggtctattactgtggtaactgcttactggggccaaggcgtgtatc	IGHV1-64*01	38	39	97.4	IGHD2-1*01	6	6	100	IGHJ2*01	15	15	100	60	59	0.983333
1	cagcagcctgacatctgaggtctctgcggtctattactgtggtaactgcttactggggccaaggtctctac	IGHV1-64*01	40	41	97.6	IGHD2-1*01	6	6	100	IGHJ2*01	14	14	100	61	60	0.983607
1	agcagcctgacatctgagtactctgcggtctattactgtggtaactgcttactggggccaaggcgtgtatc	IGHV1-64*01	39	40	97.5	IGHD2-1*01	6	6	100	IGHJ2*01	15	15	100	61	60	0.983607
1	atgcaactcagcagcctgacatctgaggactctgcggtctattactgtggcaactgcttactggggccaaggcgtgtatc	IGHV1-64*01	49	49	100					IGHJ2*01	15	15	100	64	64	1
1	cagcagcctgacatctgaggactctgcggtctattactgtggtaactgactactggggccaaggcgtttatc	IGHV1-64*01	41	41	100	IGHD2-1*01	5	5	100	IGHJ2*01	19	19	100	65	65	1
1	agcagcctgacatctgaggactctgcggtctattgctgtggtaactgcttactggggccaaggcgtgtatc	IGHV1-64*01	39	40	97.5	IGHD2-1*01	6	6	100	IGHJ2*01	15	15	100	61	60	0.983607
1	agcagcctgacatcagaggactctgcggtctattactgtggtaactgcttactggggccaaggcgtgtatc	IGHV1-64*01	39	40	97.5	IGHD2-1*01	6	6	100	IGHJ2*01	15	15	100	61	60	0.983607
1	cagcagcctgacatctgaggactctgcggtctattactgtggtaactgactactggggccaaggcatgaatcgat	IGHV1-64*01	41	41	100	IGHD2-1*01	5	5	100	IGHJ2*01	20	20	100	66	66	1
1	agcagcctgacatctgaggacactgcggtctattactgtggtaactgcttactggggccaaggcgtgtatc	IGHV1-64*01	39	40	97.5	IGHD2-1*01	6	6	100	IGHJ2*01	15	15	100	61	60	0.983607
1	cagcaacctgacatctgaggactctgcggtctattactgtggtaactgcttactggggccaaggcgtgtatc	IGHV1-64*01	40	41	97.6	IGHD2-1*01	6	6	100	IGHJ2*01	15	15	100	62	61	0.983871
1	agcagcctgacatctgagtactctgcggtctattactgtggtaactgcttactggggccaaggaaggaatcgat	IGHV1-64*01	39	40	97.5	IGHD2-1*01	6	6	100	IGHJ2*01	14	14	100	60	59	0.983333
1	agcagcctgacatctgaggactctgcggtctattactgtggtaactgactactggggccaaggtgtgtattc	IGHV1-64*01	40	40	100	IGHD2-1*01	5	5	100	IGHJ2*01	18	18	100	63	63	1
1	agcagcctgacatctgaggactctgcggcctattactgtggtaactgcttactggggccaaggcgcgatcg	IGHV1-64*01	39	40	97.5	IGHD2-1*01	6	6	100	IGHJ2*01	15	15	100	61	60	0.983607
1	actcagcagcctgacatctgaggaccctgcggtctattactgtggtaactgcttactggggccaaggcgtgg	IGHV1-64*01	43	44	97.7	IGHD2-1*01	6	6	100	IGHJ2*01	15	15	100	65	64	0.984615
1	cagcagcctgacatctgaggactctgcggtctattactgtggtaactgcttactggggccaaggtaactatc	IGHV1-64*01	41	41	100	IGHD2-1*01	6	6	100	IGHJ2*01	14	14	100	61	61	1
1	cagcagcctgacatctgaggactctgcggtctattactgttgtaactgcttactggggccaaggtctcta	IGHV1-64*01	40	40	100	IGHD2-1*01	6	6	100	IGHJ2*01	14	14	100	60	60	1
1	agcagcctgacatctgaggactctgcggtctattactgtggtaactgattactggggccaagggcgctatcgatc	IGHV1-64*01	40	40	100	IGHD2-1*01	5	5	100	IGHJ2*01	17	18	94.4	63	62	0.984127
1	agcagcctgacatctgaggactctgcggtctattactgtggtaactgactactggggtccaaggcgtgtatc	IGHV1-64*01	40	40	100	IGHD2-1*01	5	5	100	IGHJ2*01	19	20	95	65	64	0.984615
1	catgcaactcagcagcctgacatctgaggactctgcggtctattactgtggtaactgactactggggccagggcgtgtatc	IGHV1-64*01	50	50	100	IGHD2-1*01	5	5	100	IGHJ2*01	18	19	94.7	74	73	0.986486
1	agcagcctggcatctgaggactctgcggtctattactgtggtaactgcttactggggccaaggcgtgtatc	IGHV1-64*01	39	40	97.5	IGHD2-1*01	6	6	100	IGHJ2*01	15	15	100	61	60	0.983607
1	cagcagcctgacatctgaggactctgcggtctattactgtggtaactgattactggggccaagggcgcgatcg	IGHV1-64*01	41	41	100	IGHD2-1*01	5	5	100	IGHJ2*01	17	18	94.4	64	63	0.984375
1	gcaactcagcagcctgacatctgaggactctgcggtctattactgtggtaactgcttactggggccaagggcgcgatc	IGHV1-64*01	47	47	100	IGHD2-1*01	6	6	100	IGHJ2*01	14	14	100	67	67	1
1	cagcagcctgacatctgaggactctgcggtctattactgtggtaactgcttactgtggccaaggcgtgtatc	IGHV1-64*01	41	41	100	IGHD2-1*01	6	6	100	IGHJ2*01	14	15	93.3	62	61	0.983871
1	cagcagcctgacatctgaggactctgcggtctattactgtggtaacggactactggggtcaaggaaggaatcgat	IGHV1-64*01	41	41	100	IGHD2-1*01	5	5	100	IGHJ2*01	16	17	94.1	63	62	0.984127
1	cagcagcctgacatctgaggactctgcggtctattactgcggtaactgcttactggggccaaggtctcta	IGHV1-64*01	39	39	100	IGHD2-1*01	7	7	100	IGHJ2*01	14	14	100	60	60	1
1	gcaactcagcagcccgacgtctgaggactctgcggtctattactgtggtaactgactactggggccaaggcgtgtatc	IGHV1-64*01	45	47	95.7	IGHD2-1*01	5	5	100	IGHJ2*01	19	19	100	71	69	0.971831
1	agcagcctgacatctgaggactttgcggtctattactgtggtaactgattactggggccaaggcgtgtatc	IGHV1-64*01	39	40	97.5	IGHD2-1*01	5	5	100	IGHJ2*01	18	19	94.7	64	62	0.96875
1	agcagcctgacatctaaggactctgcggtctattactgtggtaactgcttactggggccaaggcgtgtatc	IGHV1-64*01	39	40	97.5	IGHD2-1*01	6	6	100	IGHJ2*01	15	15	100	61	60	0.983607
1	agcagtctgacatctgaggactctgcggtctattactgtggtaactgcttactggggccaaggcgtgtatc	IGHV1-64*01	39	40	97.5	IGHD2-1*01	6	6	100	IGHJ2*01	15	15	100	61	60	0.983607
1	cagcagcctgacatctgatgactctgcggtctattactgtggtaactgactactggggccaaggtctcta	IGHV1-64*01	40	41	97.6	IGHD2-1*01	5	5	100	IGHJ2*01	18	18	100	64	63	0.984375
1	agcagcctgacatctgaggactctgcggtctattactgtggtagttgcttactggggccaaggcgtgtatc	IGHV1-64*01	40	40	100					IGHJ2*01	18	20	90	60	58	0.966667
1	cagcagcctgacatctgaggactctgcggtctattactgtggtaactgctactggggccaaggcgtgtatca	IGHV1-64*01	41	41	100	IGHD2-1*01	6	6	100	IGHJ2*01	16	16	100	63	63	1
1	agcagccggacatctgaggactctgcggtctattactgtggtaactgcttactggggccaaggcgtgtatc	IGHV1-64*01	39	40	97.5	IGHD2-1*01	6	6	100	IGHJ2*01	15	15	100	61	60	0.983607
1	agcagcctgacatctgaggactctgcggtctattactgtggtaactgcttactcgggccaagggcgcgatcg	IGHV1-64*01	40	40	100	IGHD2-1*01	6	6	100	IGHJ2*01	13	14	92.9	60	59	0.983333
1	aactcagcagcctgacatctgaggactctgcggtctattactgtggtaactgcttactggggccaaggtatgtat	IGHV1-64*01	45	45	100	IGHD2-1*01	6	6	100	IGHJ2*01	14	14	100	65	65	1
1	agcagcctgacatctgaggactctgcggtccattactgtggtaactgactactggggccaaggcgtgtatc	IGHV1-64*01	39	40	97.5	IGHD2-1*01	5	5	100	IGHJ2*01	19	19	100	64	63	0.984375
1	agcagcctgacatctgaggactctgcggtctattactgtggtaactgactactggggccaaagcgtgtatc	IGHV1-64*01	40	40	100	IGHD2-1*01	5	5	100	IGHJ2*01	18	19	94.7	64	63	0.984375
1	agcagcctgacatctgaggacgctgcggtctattactgtggtaactgcttactggggccaaggcgtgtatc	IGHV1-64*01	39	40	97.5	IGHD2-1*01	6	6	100	IGHJ2*01	15	15	100	61	60	0.983607
1	agcagcctgacatctgaggactctgcggtctattactgtggtaactgattactagggccaaggcgtgtatc	IGHV1-64*01	40	40	100	IGHD2-1*01	5	5	100	IGHJ2*01	17	19	89.5	64	62	0.96875
1	cagcagcctgacatctgaggactctgcggtctattactgtggtaactgactactggggccaagctctctatc	IGHV1-64*01	41	41	100	IGHD2-1*01	5	5	100	IGHJ2*01	17	17	100	63	63	1
1	cagcagcctgacatctgaggactctgcggtctattactgtggtaactgcttactggtgccaaggtctctat	IGHV1-64*01	41	41	100	IGHD2-1*01	6	6	100	IGHJ2*01	13	14	92.9	61	60	0.983607
1	agcagtctgacatctgaggactctgcggtctattactttggtaactgactactggggccaaggcgtgtatc	IGHV1-64*01	38	40	95	IGHD2-1*01	5	5	100	IGHJ2*01	19	19	100	64	62	0.96875
1	cagcagcctgacatctgaggaccctgcggtctattactgtggtaactgcttactggggccaaggcgtgtatc	IGHV1-64*01	40	41	97.6	IGHD2-1*01	6	6	100	IGHJ2*01	15	15	100	62	61	0.983871
1	cagcagcctgacatctgaggactctgcggcctattactgtggtaactgcttactggggccaaggtctcta	IGHV1-64*01	40	41	97.6	IGHD2-1*01	6	6	100	IGHJ2*01	14	14	100	61	60	0.983607
1	caactcagcagcctgacatctgaggactctgcggtctattactgtggtaactgcttactggggccaaggagtgtatc	IGHV1-64*01	46	46	100	IGHD2-1*01	6	6	100	IGHJ2*01	14	14	100	66	66	1
1	agcagcctgacatctgaggactctgcggtctattattgtggtaactgactactggggccaaggcgtgtatc	IGHV1-64*01	39	40	97.5	IGHD2-1*01	5	5	100	IGHJ2*01	19	19	100	64	63	0.984375
1	agcagcctgacatctgaggactctgcggtctattactgtggtaactgtctactggggccaaggcgtgtatc	IGHV1-64*01	40	40	100	IGHD2-1*01	5	5	100	IGHJ2*01	18	19	94.7	64	63	0.984375
1	agcagcctgacatctgaggactctgcggtctattactgtgataactgactactggggccaaggcgtgtatc	IGHV1-64*01	40	40	100					IGHJ2*01	19	19	100	59	59	1
1	cagcagcctgacatctgaggactctgcggtctattactgtggtaactgactactggggccaaggtaagaatc	IGHV1-64*01	41	41	100	IGHD2-1*01	5	5	100	IGHJ2*01	18	18	100	64	64	1
1	cagcagcctgacatctgaggactctgcggtctattactgtggtaactgagtactggggtcaagggcgcgatcg	IGHV1-64*01	41	41	100	IGHD2-1*01	5	5	100	IGHJ2*01	16	18	88.9	64	62	0.96875
1	aagcagcctgacatctgaggactctgcggtctattactgtggtaactgactactggggccaaggtctctatc	IGHV1-64*01	40	40	100	IGHD2-1*01	5	5	100	IGHJ2*01	18	18	100	63	63	1
1	agcagcctgacatctgaggactctgcggtctattactgtggtaactgactactggggcaaaggcgtgtatc	IGHV1-64*01	40	40	100	IGHD2-1*01	5	5	100	IGHJ2*01	18	19	94.7	64	63	0.984375
1	cgcagcctgacatctgaggactctgcggtctattactgtggtaactgactactggggccaaggcgtgtatc	IGHV1-64*01	39	39	100	IGHD2-1*01	5	5	100	IGHJ2*01	19	19	100	63	63	1
1	cagcagcctgacatctgaggactctgcggtctattactgtggtaactgattactggggccaaggcgtgttcc	IGHV1-64*01	41	41	100	IGHD2-1*01	5	5	100	IGHJ2*01	18	19	94.7	65	64	0.984615
1	agcagcctgacatctgaggactctgcggtctattactgcggtaactgcttactggggccaaggcgtgtatc	IGHV1-64*01	38	38	100	IGHD2-1*01	7	7	100	IGHJ2*01	15	15	100	60	60	1
1	gcaactcagcaacctgacatctgaggactctgcggtctattactgtggtaacggactactggggtcaaggcgtgtatc	IGHV1-64*01	46	47	97.9	IGHD2-1*01	5	5	100	IGHJ2*01	17	18	94.4	70	68	0.971429
1	cagcagcctgacatctgaggactccgcggtctattactgtggtaactgactactggggcacaggcgtgtatc	IGHV1-64*01	40	41	97.6	IGHD2-1*01	5	5	100	IGHJ2*01	17	19	89.5	65	62	0.953846
1	agcagcctgacatctgaggactctgcggtctattactgtggtgactgactactggggccaaggcgtgtatc	IGHV1-64*01	40	40	100					IGHJ2*01	19	19	100	59	59	1
1	cagcagcctgacatctgaggactctgcggtctattactgtggtaactgacactggggccaaggcgtgtattc	IGHV1-64*01	41	41	100	IGHD2-1*01	6	6	100	IGHJ2*01	14	14	100	61	61	1
1	cagcagcctgacgtctgaggactctgcggtctattactgtggtaactgcctactggggccaaggtctctatc	IGHV1-64*01	40	41	97.6	IGHD2-1*01	5	5	100	IGHJ2*01	17	18	94.4	64	62	0.96875
1	caactcagcagcctgacatctgaggactctgcggtctattactgtggtaactgactactggggtcaaggtctgtatc	IGHV1-64*01	46	46	100	IGHD2-1*01	5	5	100	IGHJ2*01	17	18	94.4	69	68	0.985507
1	atcagcctgacatctgaggactctgcggtctattactgtggtaactggctactggggccaaggcgtgtatc	IGHV1-64*01	38	38	100	IGHD2-1*01	5	5	100	IGHJ2*01	18	19	94.7	62	61	0.983871
1	actcagcagcctgacatctgaggactctgcggtctattactgtggtaactgactactggggccaaggtaacta	IGHV1-64*01	44	44	100	IGHD2-1*01	5	5	100	IGHJ2*01	18	18	100	67	67	1
1	agcagcctgacatctgaggactctgcggtctactactgtggtaactgcttactggggccaaggcgtgtatc	IGHV1-64*01	39	40	97.5	IGHD2-1*01	6	6	100	IGHJ2*01	15	15	100	61	60	0.983607
1	agcagcctgacatctgaggacactgcggtctattactgtggtaactgattactggggccaaggcgtgtatc	IGHV1-64*01	39	40	97.5	IGHD2-1*01	5	5	100	IGHJ2*01	18	19	94.7	64	62	0.96875
1	agcagcctgacatcttaggactctgcggtctattactgtggtaactgattactggggccaaggcgtgtatc	IGHV1-64*01	39	40	97.5	IGHD2-1*01	5	5	100	IGHJ2*01	18	19	94.7	64	62	0.96875
1	aagcagcctgacatctgaggactctgcggtctattactgtggtaactgactactggggccaaggcgtgtatc	IGHV1-64*01	40	40	100	IGHD2-1*01	5	5	100	IGHJ2*01	19	19	100	64	64	1
1	agcagcctgacatctgaggactctgcggtctattactgtggtaactgcttattggggccaaggcgtgtatc	IGHV1-64*01	40	40	100	IGHD2-1*01	6	6	100	IGHJ2*01	14	15	93.3	61	60	0.983607
1	cagcagcctgacatctgaggactctgcggtctattactgtggtaactgactactggggccaaggcgtgatc	IGHV1-64*01	41	41	100	IGHD2-1*01	5	5	100	IGHJ2*01	19	19	100	65	65	1
1	agcagcctgacatctgaggactctgtggtctattactgtggtaacggactactggggtcaaggcgtgtatc	IGHV1-64*01	39	40	97.5	IGHD2-1*01	5	5	100	IGHJ2*01	17	18	94.4	63	61	0.968254
1	agcagcctgacatctgaggactctgtggtctattactgtggtaactgactactggggtcaaggcgtgtatc	IGHV1-64*01	39	40	97.5	IGHD2-1*01	5	5	100	IGHJ2*01	18	19	94.7	64	62	0.96875
1	catgcaactcagcagcctgacatctgaggactctgcggtctattactgtggtaactgactactggggccacggcgtgtatc	IGHV1-64*01	50	50	100	IGHD2-1*01	5	5	100	IGHJ2*01	18	19	94.7	74	73	0.986486
1	cagcagcctgacatctgaggactctgcggtctattactgtgctaactgactactggggccaaggtctcta	IGHV1-64*01	42	42	100					IGHJ2*01	18	18	100	60	60	1
1	cagcagcctgacatctggggactctgcggtctattactgtggtaactgcttactggggccaaggtctcta	IGHV1-64*01	40	41	97.6	IGHD2-1*01	6	6	100	IGHJ2*01	14	14	100	61	60	0.983607
1	agcagcctgacatctgaggactctgcggtccattgctgtggtaactgactactggggccaaggcgtgtatc	IGHV1-64*01	38	40	95	IGHD2-1*01	5	5	100	IGHJ2*01	19	19	100	64	62	0.96875
1	cagcagcctgacatctgaggactctgcggtctattactgtggtaactgactactggggccaaggggggtatcg	IGHV1-64*01	41	41	100	IGHD2-1*01	5	5	100	IGHJ2*01	18	18	100	64	64	1
1	atgcaactcagcagcctgacatctgaggactctgcggtctattactgtggtaactgattactggggccaaggcaagtatc	IGHV1-64*01	49	49	100	IGHD2-1*01	5	5	100	IGHJ2*01	19	20	95	74	73	0.986486
1	cagcagcctgacatctgaggactctgcggtctattactgtggtaactgacttctggggccaaggcgtgtatc	IGHV1-64*01	41	41	100	IGHD2-1*01	5	5	100	IGHJ2*01	18	19	94.7	65	64	0.984615
1	cggcagcctgacatctgaggactctgcggtctattactgtggtaactgcttactggggccaaggcatgtatc	IGHV1-64*01	39	39	100	IGHD2-1*01	6	6	100	IGHJ2*01	16	16	100	61	61	1
1	agcagcctgacatctgaggactctgcggtctattactgtagtaactgactactggggccaaggcgtgtatc	IGHV1-64*01	39	39	100	IGHD2-1*01	5	5	100	IGHJ2*01	19	19	100	63	63	1
1	agcagcctgacatctgaggactctgcagtctattactgtggtaactgattactggggccaaggaatgaatcgat	IGHV1-64*01	39	40	97.5	IGHD2-1*01	5	5	100	IGHJ2*01	17	18	94.4	63	61	0.968254
1	cagcagcctgacatctgaggactctgcggtctattactgtggtagctgactactggggccaaggtctctatc	IGHV1-64*01	41	41	100					IGHJ2*01	18	18	100	59	59	1
1	cagcagcctgacatctgaggactctgcggtctattactgtggtaactgcttactggggtcaaggcgtggaatc	IGHV1-64*01	41	41	100	IGHD2-1*01	6	6	100	IGHJ2*01	14	15	93.3	62	61	0.983871
1	cagcagcctgacatctgaggactctgcggtctattactgtggtaactgattactggggccaaggtctctaatc	IGHV1-64*01	41	41	100	IGHD2-1*01	5	5	100	IGHJ2*01	17	18	94.4	64	63	0.984375
1	cagcagcctgacagctgaggactctgcggtctattactgtggtaactgcttactggggccaaggcgtgtatc	IGHV1-64*01	40	41	97.6	IGHD2-1*01	6	6	100	IGHJ2*01	15	15	100	62	61	0.983871
1	agcagcctgacatctggggactctgcggtctattactgtggtaactgcttactggggccaaggcgtgtatc	IGHV1-64*01	39	40	97.5	IGHD2-1*01	6	6	100	IGHJ2*01	15	15	100	61	60	0.983607
1	gcaactcagcagcctgacatctgaggactctgcggtctattactgtggtaactgactactggggccaaggcctcta	IGHV1-64*01	47	47	100	IGHD2-1*01	5	5	100	IGHJ2*01	19	19	100	71	71	1
1	agcagcctgacatctcaggactctgcggtctattactgtggtaactgcttactggggccaaggcgtgtatc	IGHV1-64*01	39	40	97.5	IGHD2-1*01	6	6	100	IGHJ2*01	15	15	100	61	60	0.983607
1	agcagcctgacatctgaggactctgcggtcaattactgtggtaactgcttactggggccaaggcgtgtatc	IGHV1-64*01	39	40	97.5	IGHD2-1*01	6	6	100	IGHJ2*01	15	15	100	61	60	0.983607
1	agcagcctgacatctgaggactctgcggtctattactgtggtaactgactactggggccaaggcgtatatcg	IGHV1-64*01	40	40	100	IGHD2-1*01	5	5	100	IGHJ2*01	19	19	100	64	64	1
1	cagcagcctgacatctgaggactctgcggtctaatactgtggtaactgactactggggccaaggtctctatc	IGHV1-64*01	40	41	97.6	IGHD2-1*01	5	5	100	IGHJ2*01	18	18	100	64	63	0.984375
1	cagcagcccgacatctgaggactctgcggtctattactgtggtaactgcttactggggccaaggtaacgatc	IGHV1-64*01	40	41	97.6	IGHD2-1*01	6	6	100	IGHJ2*01	14	14	100	61	60	0.983607
1	cagcagcctgacatctgaggactctgcggtctattactgtggtaactgactactggggtcaaggcgtgt	IGHV1-64*01	41	41	100	IGHD2-1*01	5	5	100	IGHJ2*01	18	19	94.7	65	64	0.984615
1	agcagcccgacatctgaggactctgcggtctattactatggtaactgactactggggccaaggcgtgtatc	IGHV1-64*01	38	40	95	IGHD2-1*01	5	5	100	IGHJ2*01	19	19	100	64	62	0.96875
1	agcagcctgacatctgaggactctgcggtctattactgtggtaactgactactggggccgaggcgtgtatc	IGHV1-64*01	40	40	100	IGHD2-1*01	5	5	100	IGHJ2*01	18	19	94.7	64	63	0.984375
1	cagcagcctgacatccgaggactctgcggtctattactgtggtaactgcttactggggccaaggtctctac	IGHV1-64*01	40	41	97.6	IGHD2-1*01	6	6	100	IGHJ2*01	14	14	100	61	60	0.983607
1	cagcagcctgacatctgaggactctgcggtctattactgtggtaactgactactggggccaaggcgagaatgga	IGHV1-64*01	41	41	100	IGHD2-1*01	5	5	100	IGHJ2*01	19	19	100	65	65	1
1	cagcagcctgacatctgaggactctgcggtctattactgtggtaaccgactactggggccaaggcgtgtatc	IGHV1-64*01	41	41	100	IGHD2-1*01	5	5	100	IGHJ2*01	18	18	100	64	64	1
1	cagcagcctgacatctgaggactctgcggtctattactgtggtaactgcctactggggccaaggcgtgtatc	IGHV1-64*01	41	41	100	IGHD2-1*01	5	5	100	IGHJ2*01	18	19	94.7	65	64	0.984615
1	agcagcctgacatctgaggactctgcggtctattgctgtggtaactgactactggggccaaggcgtgtatc	IGHV1-64*01	39	40	97.5	IGHD2-1*01	5	5	100	IGHJ2*01	19	19	100	64	63	0.984375
1	agcagcctgacatctgaggactctgcggtctattactgtggtaactgactactggggcccaaggcgtgtatc	IGHV1-64*01	40	40	100	IGHD2-1*01	5	5	100	IGHJ2*01	14	14	100	59	59	1
1	aactcagcagcctgacacctgaggactctgcggtctattactgtggtaactgcttactggggccaaggcgtgtatc	IGHV1-64*01	44	45	97.8	IGHD2-1*01	6	6	100	IGHJ2*01	15	15	100	66	65	0.984848
1	cagtagcctgacatctgaggactctgcggtctattactgtggtaactgcttactggggccaaggtaacg	IGHV1-64*01	40	41	97.6	IGHD2-1*01	6	6	100	IGHJ2*01	14	14	100	61	60	0.983607
1	cagcagcctgacatctgaggactctgcggtctattactgtggtaactgcttacaggggccaaggcatgtatc	IGHV1-64*01	41	41	100	IGHD2-1*01	6	6	100	IGHJ2*01	15	16	93.8	63	62	0.984127
1	caactcagcggcctgacatctgaggactctgcggtctattactgtggtaactgactactggggccaaggtctgtatc	IGHV1-64*01	45	46	97.8	IGHD2-1*01	5	5	100	IGHJ2*01	18	18	100	69	68	0.985507
1	cagcagcctgacatctgaggactctgcggtctattactgtggtaactgcttactggggccaaggcatgaatcgat	IGHV1-64*01	41	41	100	IGHD2-1*01	6	6	100	IGHJ2*01	16	16	100	63	63	1
1	cagcagcctgacatctgaggactctgcggtctattactgtggtaactgactactggggccaaggcgtatctc	IGHV1-64*01	41	41	100	IGHD2-1*01	5	5	100	IGHJ2*01	19	19	100	65	65	1
1	agcagcctgacatctgaggactctgcggtctattactgtggtaactgctttactggggccaagggcgcgatcg	IGHV1-64*01	40	40	100	IGHD2-1*01	6	6	100	IGHJ2*01	14	14	100	60	60	1
1	cagcagcctgacatctgaggactctgcggtctattactgtggtaactgactactggggccaaggcaaggatca	IGHV1-64*01	41	41	100	IGHD2-1*01	5	5	100	IGHJ2*01	20	20	100	66	66	1
1	cagcagcctgacatctgaggactctgcggtctattactgtggtaactgactactggggtcaaggcaagaatcgat	IGHV1-64*01	41	41	100	IGHD2-1*01	5	5	100	IGHJ2*01	19	20	95	66	65	0.984848
1	atgcaactcagcagcctgatatctgaggactctgcggtctattactgtggtaacggactactggggtcaaggcgtgtatc	IGHV1-64*01	48	49	98	IGHD2-1*01	5	5	100	IGHJ2*01	17	18	94.4	72	70	0.972222
1	ctgcagcctgacatctgaggactctgcggtctattactgtggtaactgcttactggggccaaggcgtgtatc	IGHV1-64*01	39	39	100	IGHD2-1*01	6	6	100	IGHJ2*01	15	15	100	60	60	1
1	agcagcctgacatctgaggactctgcggtctattactgtggtaactgcttactggggccaaggccgtgtatc	IGHV1-64*01	40	40	100	IGHD2-1*01	6	6	100	IGHJ2*01	15	15	100	61	61	1
1	cagcagcctgacatctgaggactctgcggtctattactgtggtaaccgcttactggggccaaggtctctatc	IGHV1-64*01	41	41	100	IGHD2-1*01	5	5	100	IGHJ2*01	14	14	100	60	60	1
1	agcagcctgacatctgaggactctgcggtttattactgtggtaactgactactggggccaaggcgtgtatc	IGHV1-64*01	39	40	97.5	IGHD2-1*01	5	5	100	IGHJ2*01	19	19	100	64	63	0.984375
1	agcagcctgacatctgaggactctacggtctattactgtggtaactgactactggggccaaggcgtgtatc	IGHV1-64*01	39	40	97.5	IGHD2-1*01	5	5	100	IGHJ2*01	19	19	100	64	63	0.984375
1	cagcagcctgacatctgaggactctgcggtctattactgtggtaactgactactggggccaaggaagtaatcgat	IGHV1-64*01	41	41	100	IGHD2-1*01	5	5	100	IGHJ2*01	18	18	100	64	64	1
1	cagcagcctgacatctgaggactctgcggtctattactgtgggaactgactactggggccaaggtctctatc	IGHV1-64*01	41	41	100					IGHJ2*01	18	18	100	59	59	1
1	ggcagcctgacatctgaggactctgcggtctattactgtggtaacggactactggggtcaaggcgtgtatc	IGHV1-64*01	39	39	100	IGHD2-1*01	5	5	100	IGHJ2*01	17	18	94.4	62	61	0.983871

## Sheet: MBC_4
Subclone size (number of UMIs)	Sequence	V allele	V match (bp)	V length (bp)	V identity (% of germline)	D allele	D match (bp)	D length (bp)	D identity (% of germline)	J allele	J match (bp)	J length (bp)	J identity (% of germline)	Total length (bp)	Total match (bp)	Total identity (% of germline)
3620	ggactctgcggtctattactgtgcaagcggacagctcaggctacgttactatgctatggactactggggtcaaggggtcta	IGHV1-49*01	27	27	100	IGHD3-2*02	15	15	100	IGHJ4*01	30	30	100	72	72	1
2305	gcggtctattactgtgcaagcggacagcgcaggctacgttactatgctatggactactggggtcaaggatcgatcgt	IGHV1-49*01	20	20	100	IGHD3-2*02	14	15	93.3	IGHJ4*01	31	31	100	66	65	0.984848
18	gtctattactgtgcaagcggacagctcaggctacgttactatgctattgactactggggtcaagg	IGHV1-49*01	17	17	100	IGHD3-2*02	15	15	100	IGHJ4*01	29	30	96.7	62	61	0.983871
12	actctgcggtctattactgtgcaagcggacagcgcaggctacgttactatgctattgactactggggtcaagg	IGHV1-49*01	25	25	100	IGHD3-2*02	14	15	93.3	IGHJ4*01	29	30	96.7	70	68	0.971429
6	gggtcttggggctattactgtgcaagcggacagctcaggctacgttactatgctatggactactggggtcaagg	IGHV1-49*01	20	23	87	IGHD3-2*02	15	15	100	IGHJ4*01	30	30	100	68	65	0.955882
6	ggactctgcggtctattactgtgcaagcggacagctcaggctacgttactatactatggactactggggtcaagg	IGHV1-49*01	27	27	100	IGHD3-2*02	15	15	100	IGHJ4*01	29	30	96.7	72	71	0.986111
5	cggtctattactgtgcaagcggacagctcaggctacgttactacgctatggactactggggtcaagg	IGHV1-49*01	19	19	100	IGHD3-2*02	15	15	100	IGHJ4*01	29	30	96.7	64	63	0.984375
4	gtctattactgtgcaagcggacagctcaggctacgttactatgctatggtctactggggtcaagg	IGHV1-49*01	17	17	100	IGHD3-2*02	15	15	100	IGHJ4*01	29	30	96.7	62	61	0.983871
4	ctgcggtctattactgtgcaagcggacagctcgggctacgttactatgctatggactactggggtcaaggg	IGHV1-49*01	22	22	100	IGHD3-2*02	14	15	93.3	IGHJ4*01	30	30	100	67	66	0.985075
4	gtctattactgtgcaagcggacagctcaggctacgttactatgctattgactactggggccaagg	IGHV1-49*01	17	17	100	IGHD3-2*02	15	15	100	IGHJ4*01	28	30	93.3	62	60	0.967742
3	gtctattactgtgcaagcggacagctcaggctacgttactatgctatggactactgtggtcaagg	IGHV1-49*01	17	17	100	IGHD3-2*02	15	15	100	IGHJ4*01	29	30	96.7	62	61	0.983871
3	gtctattaccgtgcaagcggacagctcaggctacgttactatgctatggactactggggtcaagg	IGHV1-49*01	16	17	94.1	IGHD3-2*02	15	15	100	IGHJ4*01	30	30	100	62	61	0.983871
3	gtctattactgtgcaagcggacagcgcaggctacgttactatgctatggtctactggggtcaagg	IGHV1-49*01	17	17	100	IGHD3-2*02	14	15	93.3	IGHJ4*01	29	30	96.7	62	60	0.967742
3	cccggccgtctattactgtgcaagcggacagctcaggctacgttactatgctatagactactggggtcaagg	IGHV1-49*01	19	20	95	IGHD3-2*02	15	15	100	IGHJ4*01	29	30	96.7	65	63	0.969231
2	cggtctattactgtgcaagcggacagcgcaggctacgttactatgctatagactactggggtcaagg	IGHV1-49*01	19	19	100	IGHD3-2*02	14	15	93.3	IGHJ4*01	29	30	96.7	64	62	0.96875
2	gtctattactgtgcaagcggacagcgcaggctacgttactacgctatggactactggggtcaagg	IGHV1-49*01	17	17	100	IGHD3-2*02	14	15	93.3	IGHJ4*01	29	30	96.7	62	60	0.967742
2	gtctattactgtgcgagcggacagcgcaggctacgttactatgctatggactactggggtcaagg	IGHV1-49*01	16	17	94.1	IGHD3-2*02	14	15	93.3	IGHJ4*01	30	30	100	62	60	0.967742
2	gtctattactgtgcaagctgacagcgcaggctacgttactatgctatggactactggggtcaagg	IGHV1-49*01	17	17	100	IGHD3-2*02	14	15	93.3	IGHJ4*01	30	30	100	62	61	0.983871
2	gtctattactgagcaagcggacagcgcaggctacgttactatgctatggactactggggtcaagg	IGHV1-49*01	16	17	94.1	IGHD3-2*02	14	15	93.3	IGHJ4*01	30	30	100	62	60	0.967742
2	gcggtctattactgtacaagcggacagcgcaggctacgttactatgctatggactactggggtcaagga	IGHV1-49*01	19	20	95	IGHD3-2*02	14	15	93.3	IGHJ4*01	31	31	100	66	64	0.969697
2	gtctattactgtgcaagcggacagcgcaggttacgttactatgctatggactactggggtcaagg	IGHV1-49*01	17	17	100	IGHD3-2*02	13	15	86.7	IGHJ4*01	30	30	100	62	60	0.967742
2	gtctattattgtgcaagcggacagcgcaggctacgttactatgctatggactactggggtcaagg													0	0	#NUM!
2	gtctattactgtgcaagcggacagctcaagctacgttactatgctatggactactggggtcaagg	IGHV1-49*01	17	17	100	IGHD3-2*02	14	15	93.3	IGHJ4*01	30	30	100	62	61	0.983871
2	gtctattactgtgcaagcggacagcgcaggctacgttactatgctatggacgactggggtcaagg	IGHV1-49*01	17	17	100	IGHD3-2*02	14	15	93.3	IGHJ4*01	29	30	96.7	62	60	0.967742
2	gtctactactgtgcaagcggacagctcaggctacgttactatgctatggactactggggtcaagg	IGHV1-49*01	16	17	94.1	IGHD3-2*02	15	15	100	IGHJ4*01	30	30	100	62	61	0.983871
2	gtctattactgtgcaagcggacagcgcaggctacgttactatgctattgactactggggccaagg	IGHV1-49*01	17	17	100	IGHD3-2*02	14	15	93.3	IGHJ4*01	28	30	93.3	62	59	0.951613
1	gtctactactgtgcaagcggacagcgcaggctacgttactatgctatggactactggggtcaagg	IGHV1-49*01	16	17	94.1	IGHD3-2*02	14	15	93.3	IGHJ4*01	30	30	100	62	60	0.967742
1	gtctattaatgtgcaagcggacagctcaggctacgttactatgctatggactactggggtcaagg													0	0	#NUM!
1	gtctattactgggcaagcggacagctcaggctacgttactatgctatggactactggggtcaagg	IGHV1-49*01	16	17	94.1	IGHD3-2*02	15	15	100	IGHJ4*01	30	30	100	62	61	0.983871
1	gtctattactgtgcaagcggacagcgcaggctacgttactatgctatttactactggggtcaagg	IGHV1-49*01	17	17	100	IGHD3-2*02	14	15	93.3	IGHJ4*01	28	30	93.3	62	59	0.951613
1	gtctattactgtgcaagcggacggcgcaggctacgttactatgctatggactactggggtcaagg	IGHV1-49*01	17	17	100	IGHD3-2*02	13	15	86.7	IGHJ4*01	30	30	100	62	60	0.967742
1	gtctattactgtgcaagcggacagcgcaggctacgttactgtgctatggactactggggtcaagg	IGHV1-49*01	17	17	100	IGHD3-2*02	14	15	93.3	IGHJ4*01	29	30	96.7	62	60	0.967742
1	attactgtgcaagcggacagctcaggctacgttactatgctatggacttactggggtcaagg	IGHV1-49*01	13	13	100	IGHD3-2*02	15	15	100	IGHJ4*01	30	31	96.8	59	58	0.983051
1	gtctgttactgtgcaagcggacagcgcaggctacgttactatgctatggactactggggtcaagg	IGHV1-49*01	16	17	94.1	IGHD3-2*02	14	15	93.3	IGHJ4*01	30	30	100	62	60	0.967742
1	cggtctattactgtgcaagcggacagctcaggctacgttactatgctatggactgctggggtcaagg	IGHV1-49*01	19	19	100	IGHD3-2*02	15	15	100	IGHJ4*01	29	30	96.7	64	63	0.984375
1	gtctattactgtgcaagcggacagcccaggctacgttactatgctatggactactggggtcaagg	IGHV1-49*01	17	17	100	IGHD3-2*02	14	15	93.3	IGHJ4*01	30	30	100	62	61	0.983871
1	gtctattactgcgcaagcggacagctcaggctacgttactatgctatggactactggggtcaagg	IGHV1-49*01	16	17	94.1	IGHD3-2*02	15	15	100	IGHJ4*01	30	30	100	62	61	0.983871
1	gtctattactatgcaagcggacagcgcaggctacgttactatgctatggactactggggtcaagg	IGHV1-49*01	16	17	94.1	IGHD3-2*02	14	15	93.3	IGHJ4*01	30	30	100	62	60	0.967742
1	gtctattactgtgcaagcggacagcgcaggctacgttactatcctatggactactggggtcaagg	IGHV1-49*01	17	17	100	IGHD3-2*02	14	15	93.3	IGHJ4*01	29	30	96.7	62	60	0.967742
1	gtctattaccgtgcaagcggacagcgcaggctacgttactatgctatggactactggggtcaagg	IGHV1-49*01	16	17	94.1	IGHD3-2*02	14	15	93.3	IGHJ4*01	30	30	100	62	60	0.967742
1	gtctattactgtgcaagcggacagctcaggctacgttactttgctatggactactggggtcaagg	IGHV1-49*01	17	17	100	IGHD3-2*02	15	15	100	IGHJ4*01	29	30	96.7	62	61	0.983871
1	gtctattactgtgcaagcggacagctcaggctacgttactatgctatgtactactgtggtcaagg	IGHV1-49*01	17	17	100	IGHD3-2*02	15	15	100	IGHJ4*01	28	30	93.3	62	60	0.967742
1	gtctattactgtgcaagcggacagcgcaggctacgttactatgctatttactactggggccaagg	IGHV1-49*01	17	17	100	IGHD3-2*02	14	15	93.3	IGHJ4*01	27	30	90	62	58	0.935484
1	gtctattactgtgcaagcggacagcgcaggctacgttactatgctatggactactggggtcaaga	IGHV1-49*01	17	17	100	IGHD3-2*02	14	15	93.3	IGHJ4*01	29	29	100	61	60	0.983607
1	gtctattactgttcaagcggacagcgcaggctacgttactatgctatggactactggggtcaagg	IGHV1-49*01	16	17	94.1	IGHD3-2*02	14	15	93.3	IGHJ4*01	30	30	100	62	60	0.967742
1	gtctattactgtgcaagcggacagcgcaggctacgttactatgctatggattactggggtcaagg	IGHV1-49*01	17	17	100	IGHD3-2*02	14	15	93.3	IGHJ4*01	29	30	96.7	62	60	0.967742
1	gtctattactgtgcaaccggacagcgcaggctacgttactatgctatggactactggggtcaagg	IGHV1-49*01	16	16	100	IGHD3-2*02	14	15	93.3	IGHJ4*01	30	30	100	61	60	0.983607
1	cggtctattactgtgcaagcggacagcgcaggctatgttactatgctatggactactggggtcaagg	IGHV1-49*01	19	19	100	IGHD3-2*02	13	14	92.9	IGHJ4*01	30	30	100	63	62	0.984127
1	gtctattactgtgcaagcggacagctcatgctacgttactatgctatggactactggggtcaagg	IGHV1-49*01	17	17	100	IGHD3-2*02	14	15	93.3	IGHJ4*01	30	30	100	62	61	0.983871
1	gtctattactgtgcaagcggacagcgcaggctacgttactaggctatggactactggggtcaagg	IGHV1-49*01	17	17	100	IGHD3-2*02	14	15	93.3	IGHJ4*01	29	30	96.7	62	60	0.967742
1	gtctattactgtgcaagcggacagcgcaggctacgttactatgctatggactattggggtcaagg	IGHV1-49*01	17	17	100	IGHD3-2*02	14	15	93.3	IGHJ4*01	29	30	96.7	62	60	0.967742
1	gtctattactgtgcaagcggacagctcaggctacgttactatgctattgactattggggtcaagg	IGHV1-49*01	17	17	100	IGHD3-2*02	15	15	100	IGHJ4*01	28	30	93.3	62	60	0.967742
1	gtctattactgttcaagcggacagcgcaggctacgttactatgctatgtactactggggtcaagg	IGHV1-49*01	16	17	94.1	IGHD3-2*02	14	15	93.3	IGHJ4*01	29	30	96.7	62	59	0.951613
1	gtctattactgtgcaagcggacagctcaggctacgttactatgctatgggctactggggtcaagg	IGHV1-49*01	17	17	100	IGHD3-2*02	15	15	100	IGHJ4*01	29	30	96.7	62	61	0.983871
1	gtctattactgtgcaagcggacagcgcaggctacgttactatgctattgactattggggccaagg	IGHV1-49*01	17	17	100	IGHD3-2*02	14	15	93.3	IGHJ4*01	27	30	90	62	58	0.935484
1	gtctattactatgcaagcggacagcgcaggctacgttactatgctattgactactggggtcaagg	IGHV1-49*01	16	17	94.1	IGHD3-2*02	14	15	93.3	IGHJ4*01	29	30	96.7	62	59	0.951613
1	gtctattagtgtgcaagcggacagcgcaggctacgttactatgctatggactactggggtcaagg													0	0	#NUM!
1	gtctattactgtgcaagcggacagctcaggctacgttactgtgctatggactactggggtcaagg	IGHV1-49*01	17	17	100	IGHD3-2*02	15	15	100	IGHJ4*01	29	30	96.7	62	61	0.983871
1	gtctattactgtgcaagcggacatctcaggctacgttactatgctattgactactggggtcaagg	IGHV1-49*01	17	17	100	IGHD3-2*02	14	15	93.3	IGHJ4*01	29	30	96.7	62	60	0.967742
1	gtctattactgtgcgagcggacagctcaggctacgttactatgctatggactactggggtcaagg	IGHV1-49*01	16	17	94.1	IGHD3-2*02	15	15	100	IGHJ4*01	30	30	100	62	61	0.983871
1	gtctattactgagcaagcggacagcgcaggctacgttactatgctatggactactggggccaagg	IGHV1-49*01	16	17	94.1	IGHD3-2*02	14	15	93.3	IGHJ4*01	29	30	96.7	62	59	0.951613
1	gtctattagtgtgcaagcggacagctcaggctacgttactatgctatggactactggggtcaagg													0	0	#NUM!
1	gtctattactgtgcaagcggacagcgcaggctacgttactatgctatggactactgggttcaagg	IGHV1-49*01	17	17	100	IGHD3-2*02	14	15	93.3	IGHJ4*01	29	30	96.7	62	60	0.967742
1	cggtctattactgtgcaagtggacagcgcaggctacgttactatgctatggactactggggtcaagg	IGHV1-49*01	19	19	100	IGHD3-2*02	14	15	93.3	IGHJ4*01	30	30	100	64	63	0.984375
1	gtctattactgtgcaagcagacagcgcaggctacgttactatgctatggactactgtggtcaagg	IGHV1-49*01	17	17	100	IGHD3-2*02	15	16	93.8	IGHJ4*01	29	30	96.7	63	61	0.968254
1	gcggtctattactgtgcaagcggacagcgcaggctacgttactattctatggactactggggtcaagg	IGHV1-49*01	20	20	100	IGHD3-2*02	14	15	93.3	IGHJ4*01	29	30	96.7	65	63	0.969231
1	gtctattactgtgcaagcggacagcgcaggcgacgttactatgctatggactactggggtcaagg	IGHV1-49*01	17	17	100	IGHD3-2*02	13	15	86.7	IGHJ4*01	30	30	100	62	60	0.967742
1	gtctattactgtgcaagcggacagcgcaggctacgttactatgctatggactgttggggtcaagg	IGHV1-49*01	17	17	100	IGHD3-2*02	14	15	93.3	IGHJ4*01	28	30	93.3	62	59	0.951613
1	gtctattactgtgcaagcggacagcgcatgctacgttactatgctatggactactggggtcaagg	IGHV1-49*01	17	17	100	IGHD3-2*02	13	15	86.7	IGHJ4*01	30	30	100	62	60	0.967742
1	gtctattactgagcaagcggacagctcaggctacgttactatgctatggactactggggtcaagg	IGHV1-49*01	16	17	94.1	IGHD3-2*02	15	15	100	IGHJ4*01	30	30	100	62	61	0.983871
1	gtctattactgtgcaagcggacagcgcaggctacgttactatgctatggactactggtgtcaagg	IGHV1-49*01	17	17	100	IGHD3-2*02	14	15	93.3	IGHJ4*01	29	30	96.7	62	60	0.967742
1	gtctattactgtgcaagcggacagctcaggctacgttactattctatggtctactggggtcaagg	IGHV1-49*01	17	17	100	IGHD3-2*02	15	15	100	IGHJ4*01	28	30	93.3	62	60	0.967742
1	gtctattactgttcaggcggacagcgcaggctacgttactatgctatggactactggggtcaagg	IGHV1-49*01	14	15	93.3	IGHD3-2*02	14	15	93.3	IGHJ4*01	30	30	100	60	58	0.966667
1	gtctattactgtgcaagcggacagcgcaggctacgttactatgctatggactactgtggtcaagg	IGHV1-49*01	17	17	100	IGHD3-2*02	14	15	93.3	IGHJ4*01	29	30	96.7	62	60	0.967742

## Sheet: MBC_5
Subclone size (number of UMIs)	Sequence	V allele	V match (bp)	V length (bp)	V identity (% of germline)	D allele	D match (bp)	D length (bp)	D identity (% of germline)	J allele	J match (bp)	J length (bp)	J identity (% of germline)	Total length (bp)	Total match (bp)	Total identity (% of germline)
5625	gaggactctgcggtctatttctgtgcaagacgctgggacgggtactatgctatggactactggggtcaagggcgcgatcg	IGHV1-54*01	30	30	100	IGHD4-1*01	7	7	100	IGHJ4*01	29	29	100	66	66	1

## Sheet: MBC_6
Subclone size (number of UMIs)	Sequence	V allele	V match (bp)	V length (bp)	V identity (% of germline)	D allele	D match (bp)	D length (bp)	D identity (% of germline)	J allele	J match (bp)	J length (bp)	J identity (% of germline)	Total length (bp)	Total match (bp)	Total identity (% of germline)
12168	gacagtgccacttattactgtgcaagactttattactacggtagtagctactttgactactggggccaaggggcgcgatcg	IGHV7-2*01	27	27	100	IGHD1-1*01	19	19	100	IGHJ2*01	24	24	100	70	70	1

## Sheet: MBC_7
Subclone size (number of UMIs)	Sequence	V allele	V match (bp)	V length (bp)	V identity (% of germline)	D allele	D match (bp)	D length (bp)	D identity (% of germline)	J allele	J match (bp)	J length (bp)	J identity (% of germline)	Total length (bp)	Total match (bp)	Total identity (% of germline)
11496	gtctattactgtgcaagaggggattactacggtagtacctacgatgctatggactactggggtcaagggcgttatcgatc	IGHV1S126*01	18	18	100	IGHD1-1*01	15	15	100	IGHJ4*01	28	29	96.6	62	61	0.983871
6684	gcagtttattactgtgcaagaggggattactacggtagtacctacgatgctatggactactggggtcaaggatcgatc	IGHV1S126*01	19	21	90.5	IGHD1-1*01	15	15	100	IGHJ4*01	29	30	96.7	66	63	0.954545
486	agtatattactgtgcaagaggggattactacggtagtacctacgatgctatggactactggggtcaagggctgtatc	IGHV1S126*01	17	18	94.4	IGHD1-1*01	15	15	100	IGHJ4*01	28	29	96.6	62	60	0.967742
438	ctgcagtcgattactgtgcaagaggggattactacggtagtacctacgatgctatggactactggggtcaagg	IGHV1S126*01	21	23	91.3	IGHD1-1*01	15	15	100	IGHJ4*01	28	29	96.6	67	64	0.955224
358	agtgtattactgtgcaagaggggattactacggtagtacctacgatgctatggactactggggtcaaggatcgta	IGHV1S126*01	17	18	94.4	IGHD1-1*01	15	15	100	IGHJ4*01	29	30	96.7	63	61	0.968254
327	gatattaagcctattactgtgcaagaggggattactacggtagtacctacgatgctatggactactggggtcaagg	IGHV1S126*01	16	16	100	IGHD1-1*01	15	15	100	IGHJ4*01	28	29	96.6	60	59	0.983333
116	ccattactgtgcaagaggggattactacggtagtacctacgatgctatggactactggggtcaaggtctct	IGHV1S126*01	14	14	100	IGHD1-1*01	15	15	100	IGHJ4*01	28	29	96.6	58	57	0.982759
54	attactattactgtgcaagaggggattactacggtagtacctacgatgctatggactactggggtcaagg	IGHV1S126*01	16	16	100	IGHD1-1*01	15	15	100	IGHJ4*01	28	29	96.6	60	59	0.983333
47	cagacaattactgtgcaagaggggattactacggtagtacctacgatgctatggactactggggtcaagg	IGHV1S126*01	14	14	100	IGHD1-1*01	15	15	100	IGHJ4*01	28	29	96.6	58	57	0.982759
26	agtctattactgtgcaagaggggattactacggtagtacctacgatgctattgactactggggccaagg	IGHV1S126*01	18	18	100	IGHD1-1*01	15	15	100	IGHJ4*01	26	29	89.7	62	59	0.951613
24	gccgtcattactgtgcaagaggggattactacggtagtacctacgatgctatggactactggggtcaagg	IGHV1S126*01	14	14	100	IGHD1-1*01	15	15	100	IGHJ4*01	28	29	96.6	58	57	0.982759
21	agtctattactgtgcaagaggggattactacggtagtacctacgatgctattgactactggggtcaagg	IGHV1S126*01	18	18	100	IGHD1-1*01	15	15	100	IGHJ4*01	27	29	93.1	62	60	0.967742
15	gggggggattactgtgcaagaggggattactacggtagtacctacgatgctatggactactggggtcaagg	IGHV1S126*01	14	14	100	IGHD1-1*01	15	15	100	IGHJ4*01	28	29	96.6	58	57	0.982759
11	gcagattactgtgcaagaggggattactacggtagtacctacgatgctatggactactggggtcaagg	IGHV1S126*01	14	14	100	IGHD1-1*01	15	15	100	IGHJ4*01	28	29	96.6	58	57	0.982759
9	cagtgattactgtgcaagaggggattactacggtagtacctacgatgctatggactactggggtcaagg	IGHV1S126*01	14	14	100	IGHD1-1*01	15	15	100	IGHJ4*01	28	29	96.6	58	57	0.982759
9	gcggattactgtgcaagaggggattactacggtagtacctacgatgctatggactactggggtcaagg	IGHV1S126*01	14	14	100	IGHD1-1*01	15	15	100	IGHJ4*01	28	29	96.6	58	57	0.982759
8	aaaattactgtgcaagaggggattactacggtagtacctacgatgctatggactactggggtcaagg	IGHV1S126*01	14	14	100	IGHD1-1*01	15	15	100	IGHJ4*01	28	29	96.6	58	57	0.982759
8	gtctactactgtgcaagaggggattactacggtagtacctacgatgctatggactactggggtcaagg	IGHV1S126*01	17	18	94.4	IGHD1-1*01	15	15	100	IGHJ4*01	28	29	96.6	62	60	0.967742
8	ggagaattactgtgcaagaggggattactacggtagtacctacgatgctatggactactggggtcaagg	IGHV1S126*01	14	14	100	IGHD1-1*01	15	15	100	IGHJ4*01	28	29	96.6	58	57	0.982759
8	ggctattactgtgcaagaggggattactacggtagtacctacgatgctatggactactggggccaagg	IGHV1S126*01	16	16	100	IGHD1-1*01	15	15	100	IGHJ4*01	27	29	93.1	60	58	0.966667
7	cagtgtattactgtgcaagaggggattactacggtagttcctacgatgctatggactactggggtcaagg	IGHV1S126*01	17	18	94.4	IGHD1-1*01	14	14	100	IGHJ4*01	28	29	96.6	61	59	0.967213
7	attctattactgtgcaagaggggattactacggtagtacctacgatgctatggactactggggtcaagg	IGHV1S126*01	17	17	100	IGHD1-1*01	15	15	100	IGHJ4*01	28	29	96.6	61	60	0.983607
6	gtctattactgtgcaagaggggattactacggtagtacctacgatgctatggactactggggtaaagg	IGHV1S126*01	18	18	100	IGHD1-1*01	15	15	100	IGHJ4*01	27	29	93.1	62	60	0.967742
6	attactgtgcaagaggggattactatggtagtacctacgatgctatggactactggggtcaaggagg	IGHV1S126*01	14	14	100	IGHD1-1*01	14	15	93.3	IGHJ4*01	29	30	96.7	59	57	0.966102
6	gtctattactgtacaagaggggattactacggtagtacctacgatgctatggactactggggtcaagg	IGHV1S126*01	17	18	94.4	IGHD1-1*01	15	15	100	IGHJ4*01	28	29	96.6	62	60	0.967742
5	attactgtgcaagaggggattacgacggtagtacctacgatgctatggactactggggtcaagg	IGHV1S126*01	14	14	100	IGHD1-1*01	14	15	93.3	IGHJ4*01	28	29	96.6	58	56	0.965517
5	gcattactgtgcaagaggggattactacggtagtacctacgatgctatggactactggggtcaaggcc	IGHV1S126*01	14	14	100	IGHD1-1*01	15	15	100	IGHJ4*01	28	29	96.6	58	57	0.982759
5	cctattactgtgcaagaggggattactacggtagtacctacgatgctatggactactggggccaagg	IGHV1S126*01	16	16	100	IGHD1-1*01	15	15	100	IGHJ4*01	27	29	93.1	60	58	0.966667
5	gtattactgtgcaagaggggattactacggtagtacctacgatgctatggactactggtgtcaagg	IGHV1S126*01	15	15	100	IGHD1-1*01	15	15	100	IGHJ4*01	27	29	93.1	59	57	0.966102
5	acattactgtgcaagaggggattactacggtagtacctacgatgctatggactactggggtcaagg	IGHV1S126*01	14	14	100	IGHD1-1*01	15	15	100	IGHJ4*01	28	29	96.6	58	57	0.982759
5	agtaaattactgtgcaagaggggattactacggtagtacctacgatgctatggactactggggtcaagg	IGHV1S126*01	14	14	100	IGHD1-1*01	15	15	100	IGHJ4*01	28	29	96.6	58	57	0.982759
4	cctattactgtgcaagaggggattactgcggtagtacctacgatgctatggactactggggtcaagg	IGHV1S126*01	16	16	100	IGHD1-1*01	14	15	93.3	IGHJ4*01	28	29	96.6	60	58	0.966667
4	gtctattactgtgcaagaggtgattactacggtagtacctacgatgctatggactactggggtcaagg	IGHV1S126*01	18	18	100	IGHD1-1*01	15	15	100	IGHJ4*01	28	29	96.6	62	61	0.983871
4	gtaattactgtgcaagaggggattactacggtagtacctacgatgctatggactactggggtcaagg	IGHV1S126*01	14	14	100	IGHD1-1*01	15	15	100	IGHJ4*01	28	29	96.6	58	57	0.982759
4	gtctattactgtgcaagaggggatgactacggtagtacctacgatgctatggactactggggtcaagg	IGHV1S126*01	18	18	100	IGHD1-1*01	14	15	93.3	IGHJ4*01	28	29	96.6	62	60	0.967742
4	gagattactgtgcaagaggggattactacggtagtacctacgatgctatggactactggggtcaagg	IGHV1S126*01	14	14	100	IGHD1-1*01	15	15	100	IGHJ4*01	28	29	96.6	58	57	0.982759
4	gtctattactgtgcaagaggggattactacggtagtacctacgatgccatggactactggggtcaagg	IGHV1S126*01	18	18	100	IGHD1-1*01	15	15	100	IGHJ4*01	27	29	93.1	62	60	0.967742
4	gtctattactgtgcaaaaggggattactacggtagtacctacgatgctatggactactggggtcaagg	IGHV1S126*01	16	16	100	IGHD1-1*01	15	15	100	IGHJ4*01	28	29	96.6	60	59	0.983333
4	agtctattactgtgcaagaagggattactacggtagtacctacgatgctatggactactggggtcaagg	IGHV1S126*01	18	18	100	IGHD1-1*01	15	15	100	IGHJ4*01	28	29	96.6	62	61	0.983871
4	gtttattactgtgcaagaggggattactacggtagtacctacgatgctatggactactggggccaagg	IGHV1S126*01	17	18	94.4	IGHD1-1*01	15	15	100	IGHJ4*01	27	29	93.1	62	59	0.951613
4	gtctattactgtgcaagaggggattactacggtagcacctacgatgctatggactactggggtcaagg	IGHV1S126*01	18	18	100	IGHD1-1*01	13	13	100	IGHJ4*01	28	29	96.6	60	59	0.983333
4	gtctattactgtgcaagagggtattactacggtagtacctacgatgctatggactactggggtcaagg	IGHV1S126*01	18	18	100	IGHD1-1*01	16	16	100	IGHJ4*01	28	29	96.6	63	62	0.984127
3	gtctattactgtgcaagaggggattactacggtagtacctacgatgctatggtctactggggtcaagg	IGHV1S126*01	18	18	100	IGHD1-1*01	15	15	100	IGHJ4*01	27	29	93.1	62	60	0.967742
3	gtctattactgtgcaagaggggattactacggtagtacttacgatgctatggactactggggtcaagg	IGHV1S126*01	18	18	100	IGHD1-1*01	15	15	100	IGHJ4*01	29	30	96.7	63	62	0.984127
3	gtctattactgttcaagaggggattactacggtagtacctacgatgctatggactactggggtcaagg	IGHV1S126*01	17	18	94.4	IGHD1-1*01	15	15	100	IGHJ4*01	28	29	96.6	62	60	0.967742
3	gtctattactgtgcaagaggggattactacggtagtacctacgatgctatggagtactggggtcaagg	IGHV1S126*01	18	18	100	IGHD1-1*01	15	15	100	IGHJ4*01	27	29	93.1	62	60	0.967742
3	cctattactgtgcaagaggggattactacggtagtacctacgatgctatggactactagggtcaagg	IGHV1S126*01	16	16	100	IGHD1-1*01	15	15	100	IGHJ4*01	27	29	93.1	60	58	0.966667
3	gtctattactgggcaagaggggattactacggtagtacctacgatgctatggactactggggtcaagg	IGHV1S126*01	17	18	94.4	IGHD1-1*01	15	15	100	IGHJ4*01	28	29	96.6	62	60	0.967742
3	cgattactgtgcaagaggggattactacggtagtacctacgatgctatggactactggggccaagg	IGHV1S126*01	14	14	100	IGHD1-1*01	15	15	100	IGHJ4*01	27	29	93.1	58	56	0.965517
3	ggaattactgtgcaagaggggattactacggtagtacctacgatgctatggactactggggtcaagg	IGHV1S126*01	14	14	100	IGHD1-1*01	15	15	100	IGHJ4*01	28	29	96.6	58	57	0.982759
3	gtctattactgtgcaagaggggattattacggtagtacctacgatgctatggactactggggtcaagg	IGHV1S126*01	18	18	100	IGHD1-1*01	14	15	93.3	IGHJ4*01	28	29	96.6	62	60	0.967742
3	gtatattactgtgcaagaggggattactacggtagtacctacgatgctatggactactggggccaagg	IGHV1S126*01	17	18	94.4	IGHD1-1*01	15	15	100	IGHJ4*01	27	29	93.1	62	59	0.951613
3	gtctattactgtgcaagaggggattactacggtagtacctacgatgctatggactacttgggtcaagg	IGHV1S126*01	18	18	100	IGHD1-1*01	15	15	100	IGHJ4*01	27	29	93.1	62	60	0.967742
2	attactgtgtaagaggggattactacggtagtacctacgatgctatggactactggggtcaagg	IGHV1S126*01	13	14	92.9	IGHD1-1*01	15	15	100	IGHJ4*01	28	29	96.6	58	56	0.965517
2	gtctattactgtgcaagaggggattactacggtaatacctacgatgctatggactactggggtcaagg	IGHV1S126*01	18	18	100	IGHD1-1*01	14	15	93.3	IGHJ4*01	28	29	96.6	62	60	0.967742
2	gtctattactgtgcaagaggggagtactacggtagtacctacgatgctatggactactggggtcaagg	IGHV1S126*01	18	18	100	IGHD1-1*01	13	13	100	IGHJ4*01	28	29	96.6	60	59	0.983333
2	gtctattactgtgcaagaggggattactacggtagtacctacgatgctatggactactgggttaaagg	IGHV1S126*01	18	18	100	IGHD1-1*01	15	15	100	IGHJ4*01	26	29	89.7	62	59	0.951613
2	gtctattactgtgcaagaggggattactacggtagtatctacgatgctatggactactggggtcaaggg	IGHV1S126*01	18	18	100	IGHD1-1*01	15	15	100	IGHJ4*01	28	29	96.6	62	61	0.983871
2	gtctattactgtgcaagaggggattactacggtagtacctacgatgctatggactactgggttcaagg	IGHV1S126*01	18	18	100	IGHD1-1*01	15	15	100	IGHJ4*01	27	29	93.1	62	60	0.967742
2	attactgtgcaagaggggattactacggtagtacctacgatgctatggactacctggggtcaagg	IGHV1S126*01	14	14	100	IGHD1-1*01	15	15	100	IGHJ4*01	28	30	93.3	59	57	0.966102
2	gtctattactgtgcaagaggggattactacggtagtacctacgatgctatggactactggagtcaagg	IGHV1S126*01	18	18	100	IGHD1-1*01	15	15	100	IGHJ4*01	27	29	93.1	62	60	0.967742
2	attactgtgcaagaggggattactacggtagtgcctacgatgctatggactactggggtcaagg	IGHV1S126*01	14	14	100	IGHD1-1*01	14	14	100	IGHJ4*01	28	29	96.6	57	56	0.982456
2	cagtctattactgtgcaagaggggattactacggtagtacctacgatgctaaggactactggggtcaagg	IGHV1S126*01	18	18	100	IGHD1-1*01	15	15	100	IGHJ4*01	27	29	93.1	62	60	0.967742
2	gcaatctattactgtgcaagaggggattactacggtagtacctacgatgctatggactactggggtcaagg	IGHV1S126*01	17	17	100	IGHD1-1*01	15	15	100	IGHJ4*01	28	29	96.6	61	60	0.983607
2	gtctattactgtgcgagaggggattactacggtagtacctacgatgctatggactactggggtcaagg	IGHV1S126*01	17	18	94.4	IGHD1-1*01	15	15	100	IGHJ4*01	28	29	96.6	62	60	0.967742
2	gtttattactgtgcaagaggggattactacggtagtacctactatgctatggactactggggtcaagg	IGHV1S126*01	17	18	94.4	IGHD1-1*01	15	15	100	IGHJ4*01	29	29	100	62	61	0.983871
2	cagtctattactgtgcaagaggggattagctacggtagtacctacgatgctatggactactggggtcaagg	IGHV1S126*01	18	18	100	IGHD1-1*01	11	11	100	IGHJ4*01	28	29	96.6	58	57	0.982759
2	gcgtattactgtgcaagaggggattactacggtagtacctacgatgctatggactactggggccaagg	IGHV1S126*01	15	15	100	IGHD1-1*01	15	15	100	IGHJ4*01	27	29	93.1	59	57	0.966102
2	cacattgactgtgcaagaggggattactacggtagtacctacgatgctatggactactggggtcaagg	IGHV1S126*01	12	12	100	IGHD1-1*01	15	15	100	IGHJ4*01	28	29	96.6	56	55	0.982143
2	ttattaccgtgcaagaggggattactacggtagtacctacgatgctatggactactggggtcaagg													0	0	#NUM!
2	gtctattactgtgcaagaggggattactacagtagtacctacgatgctatggactactggggtcaagg	IGHV1S126*01	18	18	100	IGHD1-1*01	14	15	93.3	IGHJ4*01	28	29	96.6	62	60	0.967742
2	gtctattactttgcaagaggggattactacggtagtacctacgatgctatggactactggggtcaagg	IGHV1S126*01	17	18	94.4	IGHD1-1*01	15	15	100	IGHJ4*01	28	29	96.6	62	60	0.967742
2	attactgtgcaagaggggactactacggtagtacctacgatgctatggactactggggtcaagg	IGHV1S126*01	14	14	100	IGHD1-1*01	13	13	100	IGHJ4*01	28	29	96.6	56	55	0.982143
2	gtctattgctgtgcaagaggggattactacggtagtacctacgatgctatggactactggggtcaagg	IGHV1S126*01	17	18	94.4	IGHD1-1*01	15	15	100	IGHJ4*01	28	29	96.6	62	60	0.967742
2	gtctattattgtgcaagaggggattactacggtagtacctacgatgctatggactactggggtcaagg	IGHV1S126*01	17	18	94.4	IGHD1-1*01	15	15	100	IGHJ4*01	28	29	96.6	62	60	0.967742
1	attatctgtgcaagaggggattactacggtagtacctacgatgctatggactactggggtcaagg	IGHV1S126*01	10	10	100	IGHD1-1*01	15	15	100	IGHJ4*01	28	29	96.6	54	53	0.981481
1	aaaattactgtgcaagcggggattactacggtagtacctacgatgctatggactactggggtcaagg	IGHV1S126*01	13	13	100	IGHD1-1*01	15	15	100	IGHJ4*01	28	29	96.6	57	56	0.982456
1	gtctattactgtgcaagaggggattactacggtagtagctacgatgctatggactactggggtcaagg	IGHV1S126*01	18	18	100	IGHD1-1*01	17	17	100	IGHJ4*01	28	29	96.6	64	63	0.984375
1	attactgtgcaagaggggattactacggtagtacctacgatgctatggactactggggttaaagg	IGHV1S126*01	14	14	100	IGHD1-1*01	15	15	100	IGHJ4*01	25	27	92.6	56	54	0.964286
1	agtctattactgtgcaagagggattactacggtagtacctacgatgctatggactactggggtcaagg	IGHV1S126*01	18	18	100	IGHD1-1*01	15	15	100	IGHJ4*01	28	29	96.6	62	61	0.983871
1	attactgtgcaagaggggattactacggtattacctacgatgctatggactactggggtcaagg	IGHV1S126*01	14	14	100	IGHD1-1*01	14	15	93.3	IGHJ4*01	28	29	96.6	58	56	0.965517
1	gtctattactgtgcaagaggggattactacggtaggacctacgatgctatggactactggggtcaagg	IGHV1S126*01	18	18	100	IGHD1-1*01	13	13	100	IGHJ4*01	28	29	96.6	60	59	0.983333
1	attactgtgcaagaggcgattactacgatagtacctacgatgctatggactactggggtcaagg	IGHV1S126*01	14	14	100	IGHD1-1*01	14	15	93.3	IGHJ4*01	28	29	96.6	58	56	0.965517
1	gtctattactgtgcaagaggggattactacggtagtacctacgatgctatggactacttgggttaaagg	IGHV1S126*01	18	18	100	IGHD1-1*01	15	15	100	IGHJ4*01	24	27	88.9	60	57	0.95
1	attactgtgcaagaggggattactacggtagtacctgcgatgctatggactactggggtcaagg	IGHV1S126*01	14	14	100	IGHD1-1*01	17	18	94.4	IGHJ4*01	25	25	100	57	56	0.982456
1	attactgtgcaagaggggattactacggtagtacctacgatcctatggactactggggtcaagg	IGHV1S126*01	14	14	100	IGHD1-1*01	15	15	100	IGHJ4*01	27	29	93.1	58	56	0.965517
1	gctattactgtgcatgaggggattactacggtagtacctacgatgctatggactactggggtcaagg	IGHV1S126*01	15	16	93.8	IGHD1-1*01	15	15	100	IGHJ4*01	28	29	96.6	60	58	0.966667
1	gtctattactgtgcaagaggggattactacggtagtacctgcaatgctatggactactggggtcaagg	IGHV1S126*01	18	18	100	IGHD1-1*01	17	18	94.4	IGHJ4*01	25	25	100	61	60	0.983607
1	gtctattactgtgcaagaggggattagtacggtagtacctacgatgctatggactactggggtcaagg	IGHV1S126*01	18	18	100	IGHD1-1*01	14	15	93.3	IGHJ4*01	28	29	96.6	62	60	0.967742
1	gtcctattactgtgcaagaggggattactacggtagtacctacgatgctatggactactggggtcaagg	IGHV1S126*01	16	16	100	IGHD1-1*01	15	15	100	IGHJ4*01	28	29	96.6	60	59	0.983333
1	gtgcattactgtgcaagaggggattactacggtagtacctacgatgctatggactactggggtcaagga	IGHV1S126*01	14	14	100	IGHD1-1*01	15	15	100	IGHJ4*01	29	30	96.7	59	58	0.983051
1	attactgtgcaagaggggattactacggtagtacctacgatgctatggactactgtggtcaagg	IGHV1S126*01	14	14	100	IGHD1-1*01	15	15	100	IGHJ4*01	27	29	93.1	58	56	0.965517
1	gtctattactgtgcaagaggggattactacggtagtacctacgatgctatggactactgggtcaaagg	IGHV1S126*01	18	18	100	IGHD1-1*01	15	15	100	IGHJ4*01	25	29	86.2	62	58	0.935484
1	gtctattactgtgcaagaggggattactacggtagtacctacgatgctatggactactggggccaaag	IGHV1S126*01	18	18	100	IGHD1-1*01	15	15	100	IGHJ4*01	25	27	92.6	60	58	0.966667
1	gtctattactgtgcaagaggggattactacggtagtacctacgatgctatggactactggggtcgagg	IGHV1S126*01	18	18	100	IGHD1-1*01	15	15	100	IGHJ4*01	27	29	93.1	62	60	0.967742
1	attactgtgcaagaggggattactacggtagtatctacgatgctatggactactggggccaagg	IGHV1S126*01	14	14	100	IGHD1-1*01	15	15	100	IGHJ4*01	27	29	93.1	58	56	0.965517
1	gtctattactgtgcaagaggggattactacgatagtacctacgatgctatggactactggggtcaagg	IGHV1S126*01	18	18	100	IGHD1-1*01	14	15	93.3	IGHJ4*01	28	29	96.6	62	60	0.967742
1	gtctattactgcgcaagaggggattactacggtagtacctacgatgctatggactactggggtcaagg	IGHV1S126*01	17	18	94.4	IGHD1-1*01	15	15	100	IGHJ4*01	28	29	96.6	62	60	0.967742
1	ataattactgtgcaagaggggattactacggtagtacctacgatgctatggactactggggtcaagg	IGHV1S126*01	14	14	100	IGHD1-1*01	15	15	100	IGHJ4*01	28	29	96.6	58	57	0.982759
1	gttgattactgtgcaagaggggattactacggtagtacctacgatgctatggactactggggccaagg	IGHV1S126*01	14	14	100	IGHD1-1*01	15	15	100	IGHJ4*01	27	29	93.1	58	56	0.965517
1	ggctattactgtgcaagaggggattactacggtagtacctacgatgctatggactattggggtcaagg	IGHV1S126*01	16	16	100	IGHD1-1*01	15	15	100	IGHJ4*01	27	29	93.1	60	58	0.966667
1	cgattactgtgcaagaggggattactacggtagtacctacgatgctatggactactggggccaaga	IGHV1S126*01	14	14	100	IGHD1-1*01	15	15	100	IGHJ4*01	26	28	92.9	57	55	0.964912
1	actctattactgtgcaagaggggattactacggtagtacctacgatgctatggactactggggtcaagg	IGHV1S126*01	17	17	100	IGHD1-1*01	15	15	100	IGHJ4*01	28	29	96.6	61	60	0.983607
1	ttattactgtgaaagaggggattactacggtagtacctacgatgctatggactactggggtcaagg	IGHV1S126*01	14	15	93.3	IGHD1-1*01	15	15	100	IGHJ4*01	28	29	96.6	59	57	0.966102
1	cagattactgtgcaagaggggattactacggtagtacctacgatgctatggactactggggccaagg	IGHV1S126*01	14	14	100	IGHD1-1*01	15	15	100	IGHJ4*01	27	29	93.1	58	56	0.965517
1	gtctattactgtgcaagaggggattactgcggtagtacctacgatgctatggactactggggtcaagg	IGHV1S126*01	18	18	100	IGHD1-1*01	14	15	93.3	IGHJ4*01	28	29	96.6	62	60	0.967742
1	gtctattactgtgcaagaggggattactacggtagtacctacgatgctatggacaactggggtcaagg	IGHV1S126*01	18	18	100	IGHD1-1*01	15	15	100	IGHJ4*01	27	29	93.1	62	60	0.967742
1	agtatattactgtgcaagaggggattactacggtagtacctacgatgctattgactactggggtcaagg	IGHV1S126*01	17	18	94.4	IGHD1-1*01	15	15	100	IGHJ4*01	27	29	93.1	62	59	0.951613
1	attactgtgcatgaggggattactacggtagtacctacaatgctatggactactggggtcaagg	IGHV1S126*01	13	14	92.9	IGHD1-1*01	15	15	100	IGHJ4*01	28	29	96.6	58	56	0.965517
1	gtctattactgtgcaagaggggattactacggtagtacctacaatgctatggactactggggtcaagg	IGHV1S126*01	18	18	100	IGHD1-1*01	15	15	100	IGHJ4*01	28	29	96.6	62	61	0.983871
1	attactgtgcaagaggggattactacggtagtacctacgatgctatgtactactggggtcaagg	IGHV1S126*01	14	14	100	IGHD1-1*01	15	15	100	IGHJ4*01	27	29	93.1	58	56	0.965517
1	gtctattactgtgcaagaggggattactacggtagtacatacgatgctatggactactggggtcaagg	IGHV1S126*01	18	18	100	IGHD1-1*01	15	15	100	IGHJ4*01	28	29	96.6	62	61	0.983871
1	attactgtgcaagaggggattactacggtagtacctacgatactatggactactggggtcaagg	IGHV1S126*01	14	14	100	IGHD1-1*01	15	15	100	IGHJ4*01	27	29	93.1	58	56	0.965517
1	gcattactgtgcaagaggggattactacggtagtacctacgatgctatggactactggggtcaaggcgt	IGHV1S126*01	14	14	100	IGHD1-1*01	15	15	100	IGHJ4*01	28	29	96.6	58	57	0.982759
1	attactgtgcaagaggggattactacggtagaacctacgatgctatggactactggggtcaagg	IGHV1S126*01	14	14	100	IGHD1-1*01	13	13	100	IGHJ4*01	28	29	96.6	56	55	0.982143
1	gtctattactgtgcaagaggggattactacggtagtccctacgatgctatggactactggggtcaagg	IGHV1S126*01	18	18	100	IGHD1-1*01	14	14	100	IGHJ4*01	28	29	96.6	61	60	0.983607
1	gtctattactgtgcaagaggggattactacggtagtacctacgatgctatggactactggggtcaggg	IGHV1S126*01	18	18	100	IGHD1-1*01	15	15	100	IGHJ4*01	27	29	93.1	62	60	0.967742
1	gtctattactatgcaagaggggattactacggtagtacctacgatgctatggactactggggtcaagg	IGHV1S126*01	17	18	94.4	IGHD1-1*01	15	15	100	IGHJ4*01	28	29	96.6	62	60	0.967742
1	gtattactgtgcaataggggattactacggtagtacctacgatgctatggactactggggtcaagg	IGHV1S126*01	13	13	100	IGHD1-1*01	15	15	100	IGHJ4*01	28	29	96.6	57	56	0.982456
1	attactgtgcaagaggggattactacggtggtacctacgatgctatggactactggggtcaagg	IGHV1S126*01	14	14	100	IGHD1-1*01	14	15	93.3	IGHJ4*01	28	29	96.6	58	56	0.965517
1	gtctatttctattactgtgcaagaggggattactacggtagtacctacgatgctatggactactggggtcaagg	IGHV1S126*01	17	17	100	IGHD1-1*01	15	15	100	IGHJ4*01	28	29	96.6	61	60	0.983607
1	attacggtgcaagaggggattactacggtagtacctacgatgctatggactactggggtcaagg													0	0	#NUM!
1	ttattactgtgcaagaggggattactacggtagtacctacaatgctatggactactggggtcaagg	IGHV1S126*01	15	15	100	IGHD1-1*01	15	15	100	IGHJ4*01	28	29	96.6	59	58	0.983051
1	attactgtgcaagaggggattactacggtagtacctacgatgctatggactactggggtccagg	IGHV1S126*01	14	14	100	IGHD1-1*01	15	15	100	IGHJ4*01	27	29	93.1	58	56	0.965517
1	gtgaattactgtgcaagaggggattactacggtagtacctacgatgctatggactactggggtcaagg	IGHV1S126*01	14	14	100	IGHD1-1*01	15	15	100	IGHJ4*01	28	29	96.6	58	57	0.982759
1	gttcattactgtgcaagaggggattactacggtagtacctacgatgctatggactactggggtcaagg	IGHV1S126*01	14	14	100	IGHD1-1*01	15	15	100	IGHJ4*01	28	29	96.6	58	57	0.982759
1	gtctattactgtgcaagaggggattactacggtagtacctacgatgctatagactactggggtcaagg	IGHV1S126*01	18	18	100	IGHD1-1*01	15	15	100	IGHJ4*01	27	29	93.1	62	60	0.967742
1	ccattactgtgcaagaggggattactacggtagtacctacgatgctattgactactggggtcaagg	IGHV1S126*01	14	14	100	IGHD1-1*01	15	15	100	IGHJ4*01	27	29	93.1	58	56	0.965517
1	attactgtgcaagaggggattactacggtagtacctacgatgctatagactactggggccaagg	IGHV1S126*01	14	14	100	IGHD1-1*01	15	15	100	IGHJ4*01	26	29	89.7	58	55	0.948276
1	agtctattactgtccaagaggggattactacggtagtacctacgatgctatggactactggggtcaagg	IGHV1S126*01	17	18	94.4	IGHD1-1*01	15	15	100	IGHJ4*01	28	29	96.6	62	60	0.967742
1	attactgtgcaagaggggattactacggtagtacctacgatgctatggactactagggccaagg	IGHV1S126*01	14	14	100	IGHD1-1*01	15	15	100	IGHJ4*01	26	29	89.7	58	55	0.948276
1	gtctattactgtgcaagaggggattaactacggtagtacctacgatgctatggactactggggtcaagg	IGHV1S126*01	18	18	100	IGHD1-1*01	12	12	100	IGHJ4*01	28	29	96.6	59	58	0.983051
1	gtctattactgtgcaagaggggattactacggtagtacctacgatgctatggactactggggtcaaga	IGHV1S126*01	18	18	100	IGHD1-1*01	15	15	100	IGHJ4*01	27	28	96.4	61	60	0.983607
1	agtctattactgtgcaggaggggattactacggtagtacctacgatgctatggactactgggtcaaggg	IGHV1S126*01	17	18	94.4	IGHD1-1*01	15	15	100	IGHJ4*01	21	22	95.5	55	53	0.963636
1	attactgtgcaagaggggattactacggtagtacctacgatgctgtggactactggggccaagg	IGHV1S126*01	14	14	100	IGHD1-1*01	15	15	100	IGHJ4*01	26	29	89.7	58	55	0.948276
1	attactgtgcaagaggggattactacggtagtacctacgatgctatggactagtggggtcaagg	IGHV1S126*01	14	14	100	IGHD1-1*01	15	15	100	IGHJ4*01	27	29	93.1	58	56	0.965517
1	ggggattactgtgcaagaggggattactacggtagtacctacgatgctatggactactggggccaagg	IGHV1S126*01	14	14	100	IGHD1-1*01	15	15	100	IGHJ4*01	27	29	93.1	58	56	0.965517
1	gtattactgtgcaagaggggattactacggtagtacctacgatgctattgactactggggccaagg	IGHV1S126*01	15	15	100	IGHD1-1*01	15	15	100	IGHJ4*01	26	29	89.7	59	56	0.949153
1	attactgtgcaagaggggattactacggtagtacctacgatgctatggactgctggggtcaagg	IGHV1S126*01	14	14	100	IGHD1-1*01	15	15	100	IGHJ4*01	27	29	93.1	58	56	0.965517
1	attactgtgcaagaggggattactacggtagtacctatgatgctatggactactggggtcaagg	IGHV1S126*01	14	14	100	IGHD1-1*01	18	19	94.7	IGHJ4*01	25	25	100	58	57	0.982759
1	gtctattactgtgcaagaggggattactacggtagtacctacgatgctatggattattggggtcaagg	IGHV1S126*01	18	18	100	IGHD1-1*01	15	15	100	IGHJ4*01	26	29	89.7	62	59	0.951613
1	gtctattactgtgcaagaggggattacaacggtagtacctacgatgctatggactactggggtcaagg	IGHV1S126*01	18	18	100	IGHD1-1*01	14	15	93.3	IGHJ4*01	28	29	96.6	62	60	0.967742
1	gtctattactgtgcaagaggggattactacggtagtacctacgatgctatggagtactgtggtcaagg	IGHV1S126*01	18	18	100	IGHD1-1*01	15	15	100	IGHJ4*01	26	29	89.7	62	59	0.951613
1	gacattgactgtgcaagaggggattactacggtagtacctacgatgctatggactactggggtcaagg	IGHV1S126*01	11	11	100	IGHD1-1*01	15	15	100	IGHJ4*01	28	29	96.6	55	54	0.981818
1	cgattactgtgcaagaggggattactacggtagtacctacgatgctattgactactggggccaagg	IGHV1S126*01	14	14	100	IGHD1-1*01	15	15	100	IGHJ4*01	26	29	89.7	58	55	0.948276
1	agttaattactgtgcaagaggggattactacggtagtacctacgatgctatggactactggggtcaagg	IGHV1S126*01	14	14	100	IGHD1-1*01	15	15	100	IGHJ4*01	28	29	96.6	58	57	0.982759
1	cagtctattactgtgcaagaggggattactacggtagtacctacgatgctatggactactggggacaagg	IGHV1S126*01	18	18	100	IGHD1-1*01	15	15	100	IGHJ4*01	27	29	93.1	62	60	0.967742
1	attactgtgcaagaggcgattactacggtagtacctacgatgctatggactactggggtcaagg	IGHV1S126*01	14	14	100	IGHD1-1*01	15	15	100	IGHJ4*01	28	29	96.6	58	57	0.982759
1	attactgtgcaaggggggattactacggtagtacctacgatgctatggactactggggtcaagg	IGHV1S126*01	13	13	100	IGHD1-1*01	15	15	100	IGHJ4*01	28	29	96.6	57	56	0.982456
1	gtgtattactgtgcaagaggggattactacggtagtacctactatgctatggactactggggtcaagg	IGHV1S126*01	17	18	94.4	IGHD1-1*01	15	15	100	IGHJ4*01	29	29	100	62	61	0.983871
1	gtctatttctgtgcaagaggggattactacggtagtacctacgatgctatggactactggggtcaagg	IGHV1S126*01	17	18	94.4	IGHD1-1*01	15	15	100	IGHJ4*01	28	29	96.6	62	60	0.967742
1	gtctattactgtgcaagaggggattactacggtagtacctacgatgctatggactattggggtcaagg	IGHV1S126*01	18	18	100	IGHD1-1*01	15	15	100	IGHJ4*01	27	29	93.1	62	60	0.967742
1	tgattactgtgcaagaggggattactacggtagtacctacgatgctattgactactggggccaagg	IGHV1S126*01	14	14	100	IGHD1-1*01	15	15	100	IGHJ4*01	26	29	89.7	58	55	0.948276
1	gtctattactgtgcaagaggggattactacgttagtacctacgatgctatggactactggggtcaagg	IGHV1S126*01	18	18	100	IGHD1-1*01	14	15	93.3	IGHJ4*01	28	29	96.6	62	60	0.967742
1	attactgtgcaggaggggattactacggtagtacctacgatgctatggactactggggtcaagg	IGHV1S126*01	13	14	92.9	IGHD1-1*01	15	15	100	IGHJ4*01	28	29	96.6	58	56	0.965517
1	gtctattactgtgcgtgaggggattactacggtagtacctacgatgctatggactactggggtcaagg	IGHV1S126*01	14	14	100	IGHD1-1*01	15	15	100	IGHJ4*01	28	29	96.6	58	57	0.982759
1	gtctattactgtgcaagaggggattactacggtagtacctacgatgctatggactactgggtcaaggg	IGHV1S126*01	18	18	100	IGHD1-1*01	15	15	100	IGHJ4*01	21	22	95.5	55	54	0.981818
1	gcggattactgtgcaagaggggattactacggtagtacctacgatgctatggactactggggccaagg	IGHV1S126*01	14	14	100	IGHD1-1*01	15	15	100	IGHJ4*01	27	29	93.1	58	56	0.965517

## Sheet: MBC_8
Subclone size (number of UMIs)	Sequence	V allele	V match (bp)	V length (bp)	V identity (% of germline)	D allele	D match (bp)	D length (bp)	D identity (% of germline)	J allele	J match (bp)	J length (bp)	J identity (% of germline)	Total length (bp)	Total match (bp)	Total identity (% of germline)
13129	gacacagccatgtattactgtgtgagatgctacggtagtagctatgctatggactactggggtcaaggtcatgaatcga	IGHV10-1*01	27	27	100	IGHD1-1*01	12	12	100	IGHJ4*01	27	27	100	66	66	1
339	aaaactgaggacacagccatgtattactgtgtgagatgctacggtagtagctatgctatggactactggggccaagg	IGHV10-1*01	36	36	100	IGHD1-1*01	12	12	100	IGHJ4*01	26	27	96.3	75	74	0.986667
15	tggggcagccatgtattactgtgtgagatgctacggtagtagctatgctatggactactggggtcaagg	IGHV10-1*01	23	23	100	IGHD1-1*01	12	12	100	IGHJ4*01	27	27	100	62	62	1
14	ggacacagccatgtattactgtgtgagatgctacggtagtagctatgctattgactactggggtcaagg	IGHV10-1*01	28	28	100	IGHD1-1*01	12	12	100	IGHJ4*01	26	27	96.3	67	66	0.985075
11	ggcacagccatgtattactgtgtgagatgctacggtagtagctatgccatggactactggggtcaagg	IGHV10-1*01	25	25	100	IGHD1-1*01	12	12	100	IGHJ4*01	26	27	96.3	64	63	0.984375
8	tggggacagccatgtattactgtgtgagatgctacggtagtagctatgctatggactactggggtcaagg	IGHV10-1*01	24	24	100	IGHD1-1*01	12	12	100	IGHJ4*01	27	27	100	63	63	1
7	gacgcagccatgtattactgtgtgagatgctacggtagtagctatgctatggactactggggtcaagg	IGHV10-1*01	26	27	96.3	IGHD1-1*01	12	12	100	IGHJ4*01	27	27	100	66	65	0.984848
6	gaggacacagccgtgtattactgtgtgagatgctacggtagtagctatgctatggactactggggtcaagg	IGHV10-1*01	29	30	96.7	IGHD1-1*01	12	12	100	IGHJ4*01	27	27	100	69	68	0.985507
6	gaggacacagccatgtattactgtgtgaggtgctacggtagtagctatgctatggactactggggtcaagg	IGHV10-1*01	29	29	100	IGHD1-1*01	12	12	100	IGHJ4*01	27	27	100	68	68	1
6	acacagccatgtattactgtgtgagatgctacggtagtagctatgttatggactactggggtcaagg	IGHV10-1*01	26	26	100	IGHD1-1*01	12	12	100	IGHJ4*01	26	27	96.3	65	64	0.984615
5	aggacacagccatgtattactgtgcgagatgctacggtagtagctatgctatggactactggggtcaagg	IGHV10-1*01	28	29	96.6	IGHD1-1*01	12	12	100	IGHJ4*01	27	27	100	68	67	0.985294
5	acacagccatgtattactgtgtgagatgctatggtagtagctatgctatggactactggggtcaagg	IGHV10-1*01	26	26	100	IGHD1-1*01	11	12	91.7	IGHJ4*01	27	27	100	65	64	0.984615
5	acacggccatgtattactgtgtgagatgctacggtagtagctatgctatggactactggggtcaagg	IGHV10-1*01	25	26	96.2	IGHD1-1*01	12	12	100	IGHJ4*01	27	27	100	65	64	0.984615
5	gaggacacagccatgtattactgtgtgggatgctacggtagtagctatgctatggactactggggtcaagg	IGHV10-1*01	29	30	96.7	IGHD1-1*01	12	12	100	IGHJ4*01	27	27	100	69	68	0.985507
4	aggacacagccatgtattattgtgtgagatgctacggtagtagctatgctatggactactggggtcaagg	IGHV10-1*01	28	29	96.6	IGHD1-1*01	12	12	100	IGHJ4*01	27	27	100	68	67	0.985294
4	cacagccatgtattactgtgtgagatgctacggtagcagctatgctatggactactggggtcaagg	IGHV10-1*01	25	25	100	IGHD1-1*01	11	12	91.7	IGHJ4*01	27	27	100	64	63	0.984375
4	acacagccatgtattactgtgtgagatgctacggtagtagctatgctatggactactgggtcaaggg	IGHV10-1*01	26	26	100	IGHD1-1*01	12	12	100	IGHJ4*01	20	20	100	58	58	1
4	acacagccatgtattactgtgtgagatgttacggtagtagctatgctatggactactggggtcaagg	IGHV10-1*01	26	26	100	IGHD1-1*01	11	11	100	IGHJ4*01	27	27	100	64	64	1
3	ggacacagccatgtattactgtgtgagatgctacggtagtagctatgctatggactactggggtcaggg	IGHV10-1*01	28	28	100	IGHD1-1*01	12	12	100	IGHJ4*01	26	27	96.3	67	66	0.985075
3	gaggacacagccatgtattactgtgtgagatgctacggtagtagttatgctatggactactggggtcaagg	IGHV10-1*01	30	30	100	IGHD1-1*01	12	12	100	IGHJ4*01	26	26	100	68	68	1
3	aggacacagctatgtattactgtgtgagatgctacggtagtagctatgctatggactactggggtcaagg	IGHV10-1*01	28	29	96.6	IGHD1-1*01	12	12	100	IGHJ4*01	27	27	100	68	67	0.985294
3	acacagccatgtattactgtgtgagatgctacgatagtagctatgctatggactactggggtcaagg	IGHV10-1*01	26	26	100	IGHD1-1*01	11	12	91.7	IGHJ4*01	27	27	100	65	64	0.984615
3	cacagccatgcattactgtgtgagatgctacggtagtagctatgctatggactactggggtcaagg	IGHV10-1*01	24	25	96	IGHD1-1*01	12	12	100	IGHJ4*01	27	27	100	64	63	0.984375
3	gacacagccatgtattactgtgtgagatgctacggcagtagctatgctatggactactggggtcaagg	IGHV10-1*01	27	27	100	IGHD1-1*01	11	12	91.7	IGHJ4*01	27	27	100	66	65	0.984848
3	cacagccatgtattgctgtgtgagatgctacggtagtagctatgctatggactactggggtcaagg	IGHV10-1*01	24	25	96	IGHD1-1*01	12	12	100	IGHJ4*01	27	27	100	64	63	0.984375
3	aggacacagccatgtattactgtgttagatgctacggtagtagctatgctatggactactggggtcaagg	IGHV10-1*01	28	29	96.6	IGHD1-1*01	12	12	100	IGHJ4*01	27	27	100	68	67	0.985294
3	cacagccatgtattactgtgtgagatgctacggtagtagctatgctatggacgactggggtcaagg	IGHV10-1*01	25	25	100	IGHD1-1*01	12	12	100	IGHJ4*01	26	27	96.3	64	63	0.984375
2	gaggacacagccatgtattactgtgtgagatgctacggtagtagctatgctatcgactactggggtcaagg	IGHV10-1*01	30	30	100	IGHD1-1*01	12	12	100	IGHJ4*01	26	27	96.3	69	68	0.985507
2	gacacagccatgtattactatgtgagatgctacggtagtagctatgctatggactactggggtcaagg	IGHV10-1*01	26	27	96.3	IGHD1-1*01	12	12	100	IGHJ4*01	27	27	100	66	65	0.984848
2	catagccatgtattactgtgtgagatgctacggtagtagctatgctatggactactggggtcaagg	IGHV10-1*01	24	25	96	IGHD1-1*01	12	12	100	IGHJ4*01	27	27	100	64	63	0.984375
2	ggacacagccatgtattaccgtgtgagatgctacggtagtagctatgctatggactactggggtcaagg	IGHV10-1*01	27	28	96.4	IGHD1-1*01	12	12	100	IGHJ4*01	27	27	100	67	66	0.985075
2	gacacagccatgtattactgtgtgagatgctacggtagtagctatgctatggactacttgggtcaagg	IGHV10-1*01	27	27	100	IGHD1-1*01	12	12	100	IGHJ4*01	26	27	96.3	66	65	0.984848
2	cacagccatgtattactgtgtaagatgctacggtagtagctatgctatggactactggggtcaagg	IGHV10-1*01	24	25	96	IGHD1-1*01	12	12	100	IGHJ4*01	27	27	100	64	63	0.984375
2	acacagccatgtattactgtgtgagatgctacggtagtagctatactatggactactggggtcaagg	IGHV10-1*01	26	26	100	IGHD1-1*01	12	12	100	IGHJ4*01	26	27	96.3	65	64	0.984615
2	acacagccatgtattactgtgtgagatactacggtagtagctatgctatggactactggggtcaagg	IGHV10-1*01	26	26	100	IGHD1-1*01	14	14	100	IGHJ4*01	27	27	100	67	67	1
2	aggacacagccacgtattactgtgtgagatgctacggtagtagctatgctatggactactggggtcaagg	IGHV10-1*01	28	29	96.6	IGHD1-1*01	12	12	100	IGHJ4*01	27	27	100	68	67	0.985294
2	acacagccatgtattactgtgtgagaggctacggtagtagctatgctatggactactggggtcaagg	IGHV10-1*01	26	26	100	IGHD1-1*01	12	12	100	IGHJ4*01	27	27	100	65	65	1
2	ggacacagccatgtattactgtgtgagatgctacagtagtagctatgctatggactactggggtcaagg	IGHV10-1*01	28	28	100	IGHD1-1*01	11	12	91.7	IGHJ4*01	27	27	100	67	66	0.985075
2	acacagccatgtattactgtgtgagatgctacggtagtagctatgctatggactactggggtcaaga	IGHV10-1*01	26	26	100	IGHD1-1*01	12	12	100	IGHJ4*01	26	26	100	64	64	1
2	cacagccatgtattactgtgtgagacgctacggtagtagctatgctatggactactggggtcaagg	IGHV10-1*01	26	26	100	IGHD1-1*01	12	12	100	IGHJ4*01	27	27	100	65	65	1
2	cacagccatgtattactgtgtgagatgctacggtagtggctatgctatggactactggggtcaagg	IGHV10-1*01	25	25	100	IGHD1-1*01	10	10	100	IGHJ4*01	27	27	100	62	62	1
1	cacagccatgtattactgtgtgagatgctacggtagtagctatgctatggactactggggcaaagg	IGHV10-1*01	25	25	100	IGHD1-1*01	12	12	100	IGHJ4*01	25	27	92.6	64	62	0.96875
1	acacagccatgtattactgtgtgagatgctacggtagtagctatgctatgggctactggggtcaagg	IGHV10-1*01	26	26	100	IGHD1-1*01	12	12	100	IGHJ4*01	26	27	96.3	65	64	0.984615
1	ggacacagccatgtattactgtgtgagatgctgcggtagtagctatgctatggactactggggtcaagg	IGHV10-1*01	28	28	100	IGHD1-1*01	11	12	91.7	IGHJ4*01	27	27	100	67	66	0.985075
1	cacagccatgtattactgtgtgggatgctacggtagtagctatgctatgggctactggggtcaagg	IGHV10-1*01	24	25	96	IGHD1-1*01	12	12	100	IGHJ4*01	26	27	96.3	64	62	0.96875
1	gacacagccatgtattactgtgtgagatgctacgtagtagctatgctatggactactggggtcaagg	IGHV10-1*01	27	27	100	IGHD1-1*01	7	7	100	IGHJ4*01	27	27	100	61	61	1
1	cacagccatgtattactgtgtgagatgctacggtagtagctatgctatggactacttggggcaaagg	IGHV10-1*01	25	25	100	IGHD1-1*01	12	12	100	IGHJ4*01	23	25	92	62	60	0.967742
1	cacagccatgtattactgtgtgagatgctagggtagtagctatgctatggactactggggtcaagg	IGHV10-1*01	25	25	100	IGHD1-1*01	11	12	91.7	IGHJ4*01	27	27	100	64	63	0.984375
1	cacggccatgtattactgtgtgggatgctacggtagtagctatgctatggactactggggtcaagg	IGHV10-1*01	23	25	92	IGHD1-1*01	12	12	100	IGHJ4*01	27	27	100	64	62	0.96875
1	cacagccatgtgttactgtgtgagatgctacggtagtagctatgctatggactactggggccaagg	IGHV10-1*01	24	25	96	IGHD1-1*01	12	12	100	IGHJ4*01	26	27	96.3	64	62	0.96875
1	gggcacagccatgtattactgtgtgagatgctacggtagtagctatgctatggactactgggtcaaagg	IGHV10-1*01	27	28	96.4	IGHD1-1*01	12	12	100	IGHJ4*01	24	27	88.9	67	63	0.940299
1	cacagccatgtactactgtgtgagatgctacggtagtagctatgctatggactactggggtcaagg	IGHV10-1*01	24	25	96	IGHD1-1*01	12	12	100	IGHJ4*01	27	27	100	64	63	0.984375
1	cacagccatgtattactgtgtgagatgctacggtagtagcaatgctatggactactggggtcaagg	IGHV10-1*01	25	25	100	IGHD1-1*01	13	13	100	IGHJ4*01	25	25	100	63	63	1
1	gacagccatgtattactgtgtgagatgctacggtagtagctatgctatggactactggggccaagg	IGHV10-1*01	24	24	100	IGHD1-1*01	12	12	100	IGHJ4*01	26	27	96.3	63	62	0.984127
1	cacagccatgtattactgtgtgagatgctacggtagtagctatgctatggactactggggtctagg	IGHV10-1*01	25	25	100	IGHD1-1*01	12	12	100	IGHJ4*01	26	27	96.3	64	63	0.984375
1	gacacagccatgtattactgttgagatgctacggtagtagctatgctatggactactggggtcaagg	IGHV10-1*01	21	21	100	IGHD1-1*01	12	12	100	IGHJ4*01	27	27	100	60	60	1
1	aggacacagccatgtattactgtgtgagatgctacggtagtagctatgctatggactacttggggtcaagg	IGHV10-1*01	29	29	100	IGHD1-1*01	12	12	100	IGHJ4*01	27	28	96.4	69	68	0.985507
1	acacagccatgtattactgtgtgggatgctacggtagtagctatgctatggactactgggtcaaggg	IGHV10-1*01	25	26	96.2	IGHD1-1*01	12	12	100	IGHJ4*01	20	20	100	58	57	0.982759
1	cacagccatgtattactgtgtgatatgctacggtagtagctatgctatggactactggggtcaagg	IGHV10-1*01	23	23	100	IGHD1-1*01	12	12	100	IGHJ4*01	27	27	100	62	62	1
1	cacagccatgtattactgtgtgagatgctacggtagtagctatgctatggactactggggttaagg	IGHV10-1*01	25	25	100	IGHD1-1*01	12	12	100	IGHJ4*01	26	27	96.3	64	63	0.984375
1	cacagccatgtattactgtgtgagatgctactgtagtagctatgctatggactactggggtcaagg	IGHV10-1*01	25	25	100	IGHD1-1*01	11	12	91.7	IGHJ4*01	27	27	100	64	63	0.984375
1	gacacagccatgtattactgtgtgagatgctacggtagtagctatgctatggactactggggccgagg	IGHV10-1*01	27	27	100	IGHD1-1*01	12	12	100	IGHJ4*01	25	27	92.6	66	64	0.969697
1	cacagccatatattactgtgtgagatgctacggtagtagctatgctatggactactggggtcaagg	IGHV10-1*01	24	25	96	IGHD1-1*01	12	12	100	IGHJ4*01	27	27	100	64	63	0.984375
1	cacagccatgtattactgtgtgagatgttacggtagtagctatactatggactactggggtcaagg	IGHV10-1*01	25	25	100	IGHD1-1*01	11	11	100	IGHJ4*01	26	27	96.3	63	62	0.984127
1	cacagccatgtattactgtgtgagattctacggtagtagctatgctatggactactggggtcaagg	IGHV10-1*01	25	25	100	IGHD1-1*01	12	12	100	IGHJ4*01	27	27	100	64	64	1
1	cacagccatgtattactgtgtgagatgctacggtagtagctacgctatggactactggggtcaagg	IGHV10-1*01	25	25	100	IGHD1-1*01	12	12	100	IGHJ4*01	26	27	96.3	64	63	0.984375
1	cacagccatgtattacggtgtgagatgctacggtagtagctatgctatggactactggggtcaagg	IGHV10-1*01	24	25	96	IGHD1-1*01	12	12	100	IGHJ4*01	27	27	100	64	63	0.984375
1	gaggacacagccatgtattactgtgtcagatgctacggtagtagctatgctatggactactggggccaagg	IGHV10-1*01	29	30	96.7	IGHD1-1*01	12	12	100	IGHJ4*01	26	27	96.3	69	67	0.971014
1	cacagccatgtattgctgtgtgagatgctagggtagtagctatgctatggactactggggtcaagg	IGHV10-1*01	24	25	96	IGHD1-1*01	11	12	91.7	IGHJ4*01	27	27	100	64	62	0.96875
1	gaggagacagccatgtattactgtgtgagatgctacggtagtagctatgctatggactactggggtcaagg	IGHV10-1*01	29	30	96.7	IGHD1-1*01	12	12	100	IGHJ4*01	27	27	100	69	68	0.985507
1	gacacagccatgtattactgtgtgagatgctacggtagtagctatgctatggactacggggtcaagg	IGHV10-1*01	27	27	100	IGHD1-1*01	12	12	100	IGHJ4*01	26	27	96.3	66	65	0.984848
1	cacagccatgtattactgtgttagatgctacggtagtagctatgctatggactactggggccaagg	IGHV10-1*01	24	25	96	IGHD1-1*01	12	12	100	IGHJ4*01	26	27	96.3	64	62	0.96875
1	cacagacatgtattactgtgtgagatgctacggtagtagctatgctatggactactggggtcaagg	IGHV10-1*01	24	25	96	IGHD1-1*01	12	12	100	IGHJ4*01	27	27	100	64	63	0.984375
1	aggacacagccatgtattactgtgtgagatggtacggtagtagctatgctatggactactggggtcaagg	IGHV10-1*01	29	29	100	IGHD1-1*01	11	11	100	IGHJ4*01	27	27	100	67	67	1
1	cacagccatgtattactgtgtgagatgctacggtaatagctatgctatggactactggggtcaagg	IGHV10-1*01	25	25	100	IGHD1-1*01	11	12	91.7	IGHJ4*01	27	27	100	64	63	0.984375
1	acacagccatgtattactgtgtgagatgctacggtagtagctatgctatggattactggggtcaagg	IGHV10-1*01	26	26	100	IGHD1-1*01	12	12	100	IGHJ4*01	26	27	96.3	65	64	0.984615
1	cacagccatgtattactgtgtgagatgctacggtagtagctatgctatgcactactggggccaagg	IGHV10-1*01	25	25	100	IGHD1-1*01	12	12	100	IGHJ4*01	25	27	92.6	64	62	0.96875
1	cacagccatgtattactgtgtgagatgctacggtagtagctatgctatggactactggggtcgagg	IGHV10-1*01	25	25	100	IGHD1-1*01	12	12	100	IGHJ4*01	26	27	96.3	64	63	0.984375
1	cacagccatgtattactgtgtgagatgctacggtagtagctatgctattgactactggggacaagg	IGHV10-1*01	25	25	100	IGHD1-1*01	12	12	100	IGHJ4*01	25	27	92.6	64	62	0.96875
1	cacagccatgtattactgtgtgagatgctatggtagtagctatgccatggactactggggtcaagg	IGHV10-1*01	25	25	100	IGHD1-1*01	11	12	91.7	IGHJ4*01	26	27	96.3	64	62	0.96875
1	cacagccatgtgttactgtgtgagatgctacggtagtagctatgctatggactactggggtcaagg	IGHV10-1*01	24	25	96	IGHD1-1*01	12	12	100	IGHJ4*01	27	27	100	64	63	0.984375
1	acacagccatgtattactgtgtgagatgctacggtagtagctatgctatggactactggggcaaggg	IGHV10-1*01	26	26	100	IGHD1-1*01	12	12	100	IGHJ4*01	21	21	100	59	59	1
1	cacagccatgtattactgtgtgagatgctacggtagtagctatgctatggactactgaggtcaagg	IGHV10-1*01	25	25	100	IGHD1-1*01	12	12	100	IGHJ4*01	26	27	96.3	64	63	0.984375
1	cacaaccatgtattactgtgtgagatgctacggtagtagctatgctatggactactggggtcaagg	IGHV10-1*01	24	25	96	IGHD1-1*01	12	12	100	IGHJ4*01	27	27	100	64	63	0.984375
1	cacagccatgtattattgtgtgagatgctacggtagtagctatgctatggactactggggtcaggg	IGHV10-1*01	24	25	96	IGHD1-1*01	12	12	100	IGHJ4*01	26	27	96.3	64	62	0.96875
1	cacagccatgtattactttgtgagatgctacggtagtagctatactatggactactggggtcaagg	IGHV10-1*01	24	25	96	IGHD1-1*01	12	12	100	IGHJ4*01	26	27	96.3	64	62	0.96875
1	cacagccatgtattactgtgtgagatgccacggtagtagctatgctatggactactggggtcaagg	IGHV10-1*01	25	25	100	IGHD1-1*01	10	10	100	IGHJ4*01	27	27	100	62	62	1
1	cacagccatgtatgactgtgtgagatgctacggtagtagctatgctatggactactggggtcaagg	IGHV10-1*01	24	25	96	IGHD1-1*01	12	12	100	IGHJ4*01	27	27	100	64	63	0.984375
1	acagccatgtattactgtgtgagatgctacggtagtagctatgctatggactactgggtcaaggtc	IGHV10-1*01	24	24	100	IGHD1-1*01	12	12	100	IGHJ4*01	20	20	100	56	56	1

## Sheet: MBC_9
Subclone size (number of UMIs)	Sequence	V allele	V match (bp)	V length (bp)	V identity (% of germline)	D allele	D match (bp)	D length (bp)	D identity (% of germline)	J allele	J match (bp)	J length (bp)	J identity (% of germline)	Total length (bp)	Total match (bp)	Total identity (% of germline)
14473	attactgtgctcgaggcccctcttcttactacggtgattcctactatgttatggactactggggtcaaggatcgatcgt	IGHV14-3*01	13	14	92.9	IGHD1-1*01	12	13	92.3	IGHJ4*01	29	30	96.7	57	54	0.947368
11667	catctattactgtgctcgaggcccctcttcttactacggtagttcctactatgttatggactactggggtcaagggatcgt	IGHV14-3*01	18	19	94.7	IGHD1-1*01	15	16	93.8	IGHJ4*01	28	29	96.6	64	61	0.953125
6246	catctattactgtgctcgaggcccctcttcttactacggtagttcctactatattatggactactggggtcaaggg	IGHV14-3*01	18	19	94.7	IGHD1-1*01	15	16	93.8	IGHJ4*01	27	29	93.1	64	60	0.9375
726	catctattactgtgctcgaggcccctcttcttactacggtagttcctattatgttatggactactggggtcaagg	IGHV14-3*01	18	19	94.7	IGHD1-1*01	15	16	93.8	IGHJ4*01	27	29	93.1	64	60	0.9375
662	catctattactgtgctcgaggcccctcttcttactacggtgattcctactatgttatggactactggggccaagg	IGHV14-3*01	18	19	94.7	IGHD1-1*01	12	13	92.3	IGHJ4*01	27	29	93.1	61	57	0.934426
656	catctattactgtgttcgaggcccctcttcttactacggtagttcctactatgttatggactactggggtcaagg	IGHV14-3*01	17	19	89.5	IGHD1-1*01	15	16	93.8	IGHJ4*01	28	29	96.6	64	60	0.9375
539	catctattactgtgctcgaggcccctcttcttactacggtagttcctactatgttatggactactggggccaagg	IGHV14-3*01	18	19	94.7	IGHD1-1*01	15	16	93.8	IGHJ4*01	27	29	93.1	64	60	0.9375
396	catctattactgtactcgaggcccctcttcttactacggtgattcctactatgttatggactactggggtcaagg	IGHV14-3*01	17	19	89.5	IGHD1-1*01	12	13	92.3	IGHJ4*01	28	29	96.6	61	57	0.934426
354	catctattactgtgctcgaggcccctcttcttactacggtagttcctactatattatggactactggggccaagg	IGHV14-3*01	18	19	94.7	IGHD1-1*01	15	16	93.8	IGHJ4*01	26	29	89.7	64	59	0.921875
287	catctattaccgtgctcgaggcccctcttcttactacgatagttcctactatattatggactactggggtcaagg	IGHV14-3*01	17	19	89.5	IGHD1-1*01	14	16	87.5	IGHJ4*01	27	29	93.1	64	58	0.90625
194	catctattactgtgctcgaggcccctcttcttactacggtaattcctactatgttatggactactggggtcaagg	IGHV14-3*01	18	19	94.7	IGHD1-1*01	13	14	92.9	IGHJ4*01	28	29	96.6	62	59	0.951613
165	catctattactgtgctcgaggcccctcttcttattacggtagttcctactatattatggactactggggtcaagg	IGHV14-3*01	18	19	94.7	IGHD1-1*01	14	16	87.5	IGHJ4*01	27	29	93.1	64	59	0.921875
123	catctattactgtactcgaggcccctcttcttactacggtagttcctactatgttatggactactggggtcaagg	IGHV14-3*01	17	19	89.5	IGHD1-1*01	15	16	93.8	IGHJ4*01	28	29	96.6	64	60	0.9375
99	catctattactgtgctcgaggcccctcttcttactacggtgattcctactatattatggactactggggtcaagg	IGHV14-3*01	18	19	94.7	IGHD1-1*01	12	13	92.3	IGHJ4*01	27	29	93.1	61	57	0.934426
98	attactgtgctcgaggcccctcttcttactacggtgattcctactatgttattgactactggggccaagg	IGHV14-3*01	13	14	92.9	IGHD1-1*01	12	13	92.3	IGHJ4*01	26	29	89.7	56	51	0.910714
78	attactgtgctcgaggcccctcttcttactacggtaattcctactatattatggactactggggtcaagg	IGHV14-3*01	13	14	92.9	IGHD1-1*01	13	14	92.9	IGHJ4*01	27	29	93.1	57	53	0.929825
75	catctattactgtgctcgaggcccctcttcttactacggtagttcctactatgttattgactactggggccaagg	IGHV14-3*01	18	19	94.7	IGHD1-1*01	15	16	93.8	IGHJ4*01	26	29	89.7	64	59	0.921875
74	atttccgtgctcgaggcccctcttcttactacggtgattcctactatgttattgactactggggtcaagg	IGHV14-3*01	9	9	100									9	9	1
71	gtgctcgaggcccctcttcttattacggtgattcctactatgttatggactactggggtcaaggaatcgat	IGHV14-3*01	9	9	100									9	9	1
68	attactgtgctcgaggcccctcttcttactacggtgattcctattatgttatggactactggggtcaagg	IGHV14-3*01	13	14	92.9	IGHD1-1*01	12	13	92.3	IGHJ4*01	27	29	93.1	56	52	0.928571
62	gtgctcgaggcccctcttcttattacggtagttcctactatgttatggactactggggtcaaggg	IGHV14-3*01	9	9	100									9	9	1
53	catctattactgtgctcgaggcccctcttcttactacggtagttcctactatgttattgactactggggtcaagg	IGHV14-3*01	18	19	94.7	IGHD1-1*01	15	16	93.8	IGHJ4*01	27	29	93.1	64	60	0.9375
51	catctattactgtgttcgaggcccctcttcttactacggtgattcctactatgttatggactactggggtcaagg	IGHV14-3*01	17	19	89.5	IGHD1-1*01	12	13	92.3	IGHJ4*01	28	29	96.6	61	57	0.934426
45	catctattactgtgctcgaggcccctcttcttactacggtagttcctattatattatggactactggggtcaagg	IGHV14-3*01	18	19	94.7	IGHD1-1*01	15	16	93.8	IGHJ4*01	26	29	89.7	64	59	0.921875
36	attactgtgctcgaggcccctcttcttactacggtagttcctactatattattgactactggggtcaagg	IGHV14-3*01	13	14	92.9	IGHD1-1*01	15	16	93.8	IGHJ4*01	26	29	89.7	59	54	0.915254
36	attactgtgctcgaggcccctcttcttactacggtagttcctactatattattgactactggggccaagg	IGHV14-3*01	13	14	92.9	IGHD1-1*01	15	16	93.8	IGHJ4*01	25	29	86.2	59	53	0.898305
32	attactgtgctcgaggcccctcttcttactacgttagttcctactatattatggactactggggtcaagg	IGHV14-3*01	13	14	92.9	IGHD1-1*01	14	16	87.5	IGHJ4*01	27	29	93.1	59	54	0.915254
27	gtgttcgaggcccctcttcttactacggtagttcctactatattatggactactggggtcaaggatcgatcgt	IGHV14-3*01	9	9	100									9	9	1
26	attactgtactcgaggcccctcttcttactacggtagttcctactatattatggactactggggtcaagg	IGHV14-3*01	9	9	100	IGHD1-1*01	6	6	100					15	15	1
25	attactgtgctcgaggcccctcttcttactacggtagttcctattatgttatggactactggggccaagg	IGHV14-3*01	13	14	92.9	IGHD1-1*01	15	16	93.8	IGHJ4*01	26	29	89.7	59	54	0.915254
23	catgtattactgtgctcgaggcccctcttcttactacggtagttcttactatgttatggactactggggtcaagg	IGHV14-3*01	17	19	89.5	IGHD1-1*01	15	16	93.8	IGHJ4*01	29	30	96.7	65	61	0.938462
22	catctattactgtactcgaggcccctcttcttactacggtgattcctactatgttatggactactggggccaagg	IGHV14-3*01	17	19	89.5	IGHD1-1*01	12	13	92.3	IGHJ4*01	27	29	93.1	61	56	0.918033
22	attactgtgttcgaggcccctcttcttactacggtagttcctactatgttatggactactggggccaagg	IGHV14-3*01	12	14	85.7									14	12	0.857143
22	attactgtgctcgaggcccctcttcttactacgatagttcctactatattatggactactggggccaagg	IGHV14-3*01	13	14	92.9	IGHD1-1*01	14	16	87.5	IGHJ4*01	26	29	89.7	59	53	0.898305
21	attactgtgttcgaggcccctcttcttactacggtagttcttactatgttatggactactggggtcaagg	IGHV14-3*01	12	14	85.7	IGHD1-1*01	15	16	93.8	IGHJ4*01	29	30	96.7	60	56	0.933333
20	attactgtgctcgaggcccctcttcttactacgatagttcctactatgttatggactactggggtcaagg	IGHV14-3*01	13	14	92.9	IGHD1-1*01	14	16	87.5	IGHJ4*01	28	29	96.6	59	55	0.932203
19	attactgtgctcgaggcccctcttcttactgcggtgattcctactatgttatggactactggggtcaagg	IGHV14-3*01	13	14	92.9	IGHD1-1*01	11	13	84.6	IGHJ4*01	28	29	96.6	56	52	0.928571
16	attactgttctcgaggcccctcttcttactacggtagttcctactatgttatggactactggggtcaagg	IGHV14-3*01	9	9	100									9	9	1
15	attattgtgctcgaggcccctcttcttactatggtgattcctactatgttatggactactggggtcaagg	IGHV14-3*01	9	9	100	IGHD1-1*01	5	5	100					14	14	1
13	catctattactgtgctcgaggcccctcttcttactacgatgattcctactatgttatggactactggggtcaagg	IGHV14-3*01	18	19	94.7	IGHD1-1*01	10	11	90.9	IGHJ4*01	28	29	96.6	59	56	0.949153
12	catctattactgtgctcgaggcccctcttcttactacggtagttcctactatattatggactactggggtcaaag	IGHV14-3*01	18	19	94.7	IGHD1-1*01	15	16	93.8	IGHJ4*01	25	27	92.6	62	58	0.935484
11	catctattactgtgctcgaggcccctcttcttactacggtagtttctactatattatggactactggggtcaagg	IGHV14-3*01	18	19	94.7	IGHD1-1*01	15	16	93.8	IGHJ4*01	27	29	93.1	64	60	0.9375
11	attactgtgctcgaggcccctcttcttactacggtagttcctactattttatggactactggggtcaagg	IGHV14-3*01	13	14	92.9	IGHD1-1*01	15	16	93.8	IGHJ4*01	27	29	93.1	59	55	0.932203
11	cgtgctcgatgcccctcttcttactacggtgattcctactatgttatggactactggggtcaagg													0	0	#NUM!
11	attactgtgctcgaggcccctcttcttactacggtagttactactatgttatggactactggggtcaagg	IGHV14-3*01	13	14	92.9	IGHD1-1*01	15	16	93.8	IGHJ4*01	28	29	96.6	59	56	0.949153
10	actgtgctcgaggctcctcttcttactacggtgattcctactatgttatggactactggggtcaagg													0	0	#NUM!
10	catctattactgtgctcgaggcccctcttcttactacggtgattcctactatgttatggactactggggtcaaag	IGHV14-3*01	18	19	94.7	IGHD1-1*01	12	13	92.3	IGHJ4*01	26	27	96.3	59	56	0.949153
10	gtgttcgaggcccctcttcttactacggtaattcctactatgttatggactactggggtcaagg	IGHV14-3*01	9	9	100									9	9	1
10	attactgtgctcgaggcccctcttcttactgcggtagttcctactatgttatggactactggggtcaagg	IGHV14-3*01	13	14	92.9	IGHD1-1*01	14	16	87.5	IGHJ4*01	28	29	96.6	59	55	0.932203
9	attactgtgttcgaggcccctcttcttattacggtagttcctactatgttatggactactggggtcaagg	IGHV14-3*01	12	14	85.7									14	12	0.857143
9	gtgctcgaggcccctcttcttacgacggtagttcctactatgttatggactactggggtcaagg	IGHV14-3*01	9	9	100									9	9	1
9	gttctcgaggcccctcttcttactacggtgattcctactatgttatggactactggggtcaagg	IGHV14-3*01	9	9	100									9	9	1
9	gtgctcgaggcccctcttcttactacggtgattcctactatgttattgcttactggggccaagg	IGHV14-3*01	9	9	100									9	9	1
9	attactgtgctcgaggcccctcttcttactacggtgattcttactatgttatggactactggggtcaagg	IGHV14-3*01	13	14	92.9	IGHD1-1*01	12	13	92.3	IGHJ4*01	29	30	96.7	57	54	0.947368
9	attactgtactcgaggcccctcttcttactacggtaattcctactatgttatggactactggggtcaagg	IGHV14-3*01	9	9	100	IGHD1-1*01	6	6	100					15	15	1
9	attactgtgctcgaggcccttcttcttactacggtagttcctactatgttatggactactggggtcaagg	IGHV14-3*01	13	14	92.9	IGHD1-1*01	15	16	93.8	IGHJ4*01	28	29	96.6	59	56	0.949153
9	gtgctcgatgcccctcttcttactacggtagttcctactatattatggactactggggtcaagg													0	0
9	attactgtgctcgaggcccctcttcttactatggtagttcctactatattatggactactggggtcaagg	IGHV14-3*01	13	14	92.9	IGHD1-1*01	14	16	87.5	IGHJ4*01	27	29	93.1	59	54	0.915254
8	attactgtactcgaggcccctcttcttactacggtagttcctactatgttatggactactggggccaagg	IGHV14-3*01	9	9	100	IGHD1-1*01	6	6	100					15	15	1
8	attactgtgctcgaggcccctcttcttactacggtgattcctactatgttatggactactggggtcgagg	IGHV14-3*01	13	14	92.9	IGHD1-1*01	12	13	92.3	IGHJ4*01	27	29	93.1	56	52	0.928571
8	gtgctcgagacccctcttcttactacggtgattcctactatgttatggactactggggtcaagg													0	0	#NUM!
8	gtgctcgaggcccctcttcttacgacggtagttcctactatattatggactactggggtcaagg	IGHV14-3*01	9	9	100									9	9	1
8	gtgctcgaggcccctcttcttactacggtatttcctactatgttatggactactggggtcaaggatcgatcgt	IGHV14-3*01	9	9	100									9	9	1
8	ccgtgctcgaggcccctctccttactacggtgattcctactatgttatggactactggggtcaagg	IGHV14-3*01	14	17	82.4									17	14	0.823529
8	gtgctcgaggcccctcttcttactacggtacttcctactatgttatggactactggggtcaagg	IGHV14-3*01	9	9	100									9	9	1
8	attactgtgctcgaggcccctcttcttactacgttgattcctactatgttatggactactggggtcaagg	IGHV14-3*01	13	14	92.9	IGHD1-1*01	10	11	90.9	IGHJ4*01	28	29	96.6	54	51	0.944444
7	attactgtgctcgaggtccctcttcttactacggtgattcctactatgttatggactactggggtcaagg	IGHV14-3*01	13	14	92.9	IGHD1-1*01	12	13	92.3	IGHJ4*01	28	29	96.6	56	53	0.946429
7	gtgctcgaggcccctcttcttacgacggtgattcctactatgttatggactactggggtcaagg	IGHV14-3*01	9	9	100									9	9	1
7	actgtgctcgaggcccctcttcttactacggtagttcctactttgttctggactactggggtcaagg	IGHV14-3*01	9	9	100									9	9	1
7	attactgtgctcgaggcccctcttcttactacggtgattcctactatgttattgattactggggtcaagg	IGHV14-3*01	13	14	92.9	IGHD1-1*01	12	13	92.3	IGHJ4*01	26	29	89.7	56	51	0.910714
7	attactgtgctcgaggcccctcttcttactacggtgattcatactatgttatggactactggggtcaagg	IGHV14-3*01	13	14	92.9	IGHD1-1*01	12	13	92.3	IGHJ4*01	28	29	96.6	56	53	0.946429
7	attactgtgctcgaggcctctcttcttactacggtgattcctactatgttatggactactggggtcaagg	IGHV14-3*01	13	14	92.9	IGHD1-1*01	12	13	92.3	IGHJ4*01	28	29	96.6	56	53	0.946429
7	gtgctcgaggcccctcttcttactacggtagttcctactttgttctggactactggggccaagg	IGHV14-3*01	9	9	100									9	9	1
7	gtgctcgaggcccctcttcttactacggtgattcctaccatgttatggactactggggtcaagg	IGHV14-3*01	9	9	100									9	9	1
7	catctattactgtgctcgaggcccctcttcttactacggtttttcctactatgttatggactactggggtcaagg	IGHV14-3*01	18	19	94.7	IGHD1-1*01	12	13	92.3	IGHJ4*01	28	29	96.6	61	58	0.95082
7	catctattactgtgctcgaggaccctcttcttactacggtagttcctactatgttatggactactggggtcaagg	IGHV14-3*01	18	19	94.7	IGHD1-1*01	15	16	93.8	IGHJ4*01	28	29	96.6	64	61	0.953125
7	actgtgctcgatgcccctcttcttactacggtagttcctactatgttatggactactggggtcaagg													0	0	#NUM!
6	tgtgctcgaggcccctcttcttactacggtggttcctactatgttatggactactggggtcaagg	IGHV14-3*01	9	9	100									9	9	1
6	gtgctcgaggcccctcttcttactgcggtagttcctactatattatggactactggggtcaagg													0	0
6	gtgctcgaggcccctcttcttattacggtagttcctactatattatggactactggggccaagg	IGHV14-3*01	9	9	100									9	9	1
6	catctattactgtgctcgaggcccctcttcttactatggtagttcctactatgttatggactactggggtcaagg	IGHV14-3*01	18	19	94.7	IGHD1-1*01	14	16	87.5	IGHJ4*01	28	29	96.6	64	60	0.9375
6	attactgtgctcgaggcccctcttcttactacggtagttcctattatattatggactactggggccaagg	IGHV14-3*01	13	14	92.9	IGHD1-1*01	15	16	93.8	IGHJ4*01	25	29	86.2	59	53	0.898305
6	attactgtgctcgaggcccctcttcttactacgttagttcctactatgttatggactactggggtcaagg	IGHV14-3*01	13	14	92.9	IGHD1-1*01	14	16	87.5	IGHJ4*01	28	29	96.6	59	55	0.932203
6	actgtgctcgaggcccctcttcttactacggtagttcctattatgttattgactactggggccaagg	IGHV14-3*01	9	9	100									9	9	1
6	attactgtgctcgaggcccctcttcttactacggtagttcctactatgttattgcttactggggccaagg	IGHV14-3*01	13	14	92.9	IGHD1-1*01	15	16	93.8	IGHJ4*01	24	29	82.8	59	52	0.881356
6	tactgttctcgaggcccctcttcttactacggtagttcctactatattatggactactggggtcaagg													0	0
6	attactttgctcgaggcccctcttcttactacggtagttcctactatgttatggactactggggtcaagg	IGHV14-3*01	9	9	100	IGHD1-1*01	6	6	100					15	15	1
6	attactgtgctcgaggcccctcttcttacaacggtgattcctactatgttatggactactggggtcaagg	IGHV14-3*01	13	14	92.9	IGHD1-1*01	11	13	84.6	IGHJ4*01	28	29	96.6	56	52	0.928571
6	attactgtgctcgaggcccctcttcttattacggtagttcctattatgttatggactactggggtcaagg	IGHV14-3*01	13	14	92.9	IGHD1-1*01	14	16	87.5	IGHJ4*01	27	29	93.1	59	54	0.915254
6	attattgtgctcgaggcccctcttcttactacggtgattcctactatgttatggactactggggtcaaga	IGHV14-3*01	9	9	100	IGHD1-1*01	5	5	100					14	14	1
6	catctattactgtgctcgaggcccctcttcttactacggtagttcttactatattatggactactggggtcaagg	IGHV14-3*01	18	19	94.7	IGHD1-1*01	15	16	93.8	IGHJ4*01	28	30	93.3	65	61	0.938462
6	ggtgctcgaggctcctcttcttactacggtagttcctactatgttatggactactggggtcaagg													0	0	#NUM!
5	gtgctcgaggcccttcttcttactacggtgattcctactatgttatggactactggggtcaagg													0	0	#NUM!
5	attactgtgctcgaggcccctcttcttactacggtagtttctactatgttatggactactggggtcaagg	IGHV14-3*01	13	14	92.9	IGHD1-1*01	15	16	93.8	IGHJ4*01	28	29	96.6	59	56	0.949153
5	attactgtgctcgaggcccctcttcttactacggtgattcctactattttatggactactggggtcaagg	IGHV14-3*01	13	14	92.9									14	13	0.928571
5	attgtgctcgaggcccctcttcttaccacggtgattcctactatgttatggactactggggtcaagg	IGHV14-3*01	9	9	100									9	9	1
5	gtgctcgaggcccctcttcttaccacggtagttcctactatgttatggactactggggtcaagg	IGHV14-3*01	9	9	100									9	9	1
5	ttgctcgaggcccctcttcttactacggtagttcctactatattatggactactggggtcaagg													0	0
5	attactgtgctcgaggcccctcttcttactacggtagttcctactatattattgcttactggggccaagg	IGHV14-3*01	13	14	92.9	IGHD1-1*01	15	16	93.8	IGHJ4*01	23	29	79.3	59	51	0.864407
5	ccgtgctcgaggcccctcttcttactacggtagttcctactatgttatggactactggggccaagg	IGHV14-3*01	9	9	100									9	9	1
5	gtgctcgaggcccctcttcttactacggcagttcctactatgttatggactactggggtcaagg	IGHV14-3*01	9	9	100									9	9	1
5	attactgtgctcgaggcccctcttcttactacggtagttcctactatgttatagactactggggtcaagg	IGHV14-3*01	13	14	92.9	IGHD1-1*01	15	16	93.8	IGHJ4*01	27	29	93.1	59	55	0.932203
5	gtgttcgaggcccctcttcttactacggtagttcctattatgttatggactactggggtcaagg	IGHV14-3*01	9	9	100									9	9	1
5	attactgtgctcggggcccctcttcttactacggtgattcctactatgttatggactactggggtcaagg	IGHV14-3*01	11	11	100	IGHD1-1*01	12	13	92.3	IGHJ4*01	28	29	96.6	53	51	0.962264
5	attactgtgctcgaggcccctcttcttactacggtaattcctattatgttatggactactggggtcaagg	IGHV14-3*01	13	14	92.9	IGHD1-1*01	13	14	92.9	IGHJ4*01	27	29	93.1	57	53	0.929825
5	attactgtgctcgaggcccctcttcttactacggtgattcctactatgctatggactactggggtcaagg	IGHV14-3*01	13	14	92.9	IGHD1-1*01	12	13	92.3	IGHJ4*01	29	29	100	56	54	0.964286
5	actgtgctcgaggcccctctttttactacggtagttcctactatgttatggactactggggtcaagg	IGHV14-3*01	9	9	100									9	9	1
5	cggtgctcgaggcccctcttcttactacggtagttcctactatgttatggactactggggccaagg	IGHV14-3*01	9	9	100									9	9	1
5	gtgctagaggcccctcttcttactacggtagttcctactatgttatggactactggggtcaagg	IGHV14-3*01	9	9	100									9	9	1
4	gtgctcgaggctcctcttcttactacggtagttcctactatattatggactactggggtcaagg													0	0
4	gtgctcgaggcccctcttcttactacggtagttactactattttatggactactggggtcaagg	IGHV14-3*01	9	9	100									9	9	1
4	gtgctcgaggcccctcttcttgctacggtgattcctactatgttatggactactggggtcaagg	IGHV14-3*01	9	9	100									9	9	1
4	catctattactgtgctcgaggcccctcttcttactacggtggttcctactatattatggactactggggtcaagg	IGHV14-3*01	18	19	94.7	IGHD1-1*01	14	16	87.5	IGHJ4*01	27	29	93.1	64	59	0.921875
4	gtgctctaggcccctcttcttactacggtagttcctactatgttatggactactggggtcaagg													0	0	#NUM!
4	gtgctcgaggcccctcttcttgctacggtagttcctactatattatggactactggggtcaagg													0	0
4	attactgtgctcgaggcccctctttttactacggtgattcctactatgttatggactactggggtcaagg	IGHV14-3*01	13	14	92.9	IGHD1-1*01	12	13	92.3	IGHJ4*01	28	29	96.6	56	53	0.946429
4	aattactgtgctcaaggcccctcttcttactacggtagttcctactatattatggactactggggtcaagg	IGHV14-3*01	11	11	100									11	11	1
4	attattgtgctcgaggcccctcttcttactacggtgattcctactatattatggactactggggccaagg	IGHV14-3*01	9	9	100									9	9	1
4	attactgtgctcgaggcccctcttcttactacggtacttcctactatattatggactactggggtcaagg	IGHV14-3*01	13	14	92.9	IGHD1-1*01	13	14	92.9	IGHJ4*01	27	29	93.1	57	53	0.929825
4	attactgtgctcgaggcccctcttctcactacggtagttcctactatgttatggactactggggtcaagg	IGHV14-3*01	13	14	92.9	IGHD1-1*01	14	16	87.5	IGHJ4*01	28	29	96.6	59	55	0.932203
4	actgtgctcgaggcccctcttcttactacggtagttcctactatgttattgattactggggtcaagg	IGHV14-3*01	9	9	100									9	9	1
4	attactgtgctcgaggcccctcttctgactacggtgattcctactatgttatggactactggggtcaagg	IGHV14-3*01	13	14	92.9	IGHD1-1*01	11	13	84.6	IGHJ4*01	28	29	96.6	56	52	0.928571
4	gtgctcgaggccccgcttcttactacggtgattcctactatgttatggactactggggtcaagg													0	0	#NUM!
4	tactgtgctcgaggcccctcttcttactacggtagttccgactatgttatggactactggggtcaagg	IGHV14-3*01	11	12	91.7	IGHD1-1*01	15	16	93.8	IGHJ4*01	27	28	96.4	56	53	0.946429
4	gtgctcgaggcccctcctcttactacggtagttcctactatattatggactactggggtcaagg													0	0
4	attactgtgctcgaggcccctcttcttactacggtgattcctactatgttatggactactgggttaaagg	IGHV14-3*01	13	14	92.9	IGHD1-1*01	12	13	92.3	IGHJ4*01	26	29	89.7	56	51	0.910714
4	actgtgctcgaggccccttttcttactacggtagttcctactatattatggactactggggtcaagg	IGHV14-3*01	9	9	100									9	9	1
4	attactgtgctcgaggcccctcttcttactacggtgattcctactatgttattgattactggggccaagg	IGHV14-3*01	13	14	92.9	IGHD1-1*01	12	13	92.3	IGHJ4*01	25	29	86.2	56	50	0.892857
4	gtgctcgaggcccctcttcttactacggttattcctactatgttatggactactggggtcaagg	IGHV14-3*01	9	9	100									9	9	1
4	gtgctcgaggcccctcttcctactacggtagttcctactatgttatggactactggggtcaagg	IGHV14-3*01	9	9	100									9	9	1
4	cgtgctcgaggcccctcttcttactacggtaattcctactatgttatggactactggggccaagg	IGHV14-3*01	9	9	100									9	9	1
4	attactgtgttcgaggcccctcttcttactacggtacttcctactatgttatggactactggggtcaagg	IGHV14-3*01	12	14	85.7									14	12	0.857143
4	cggtgctcgaggccctcttcttactacggtagttcctactatgttatggactactggggtcaagg													0	0	#NUM!
4	attactgtgctcgaggcccctcttcttactacggtagttactactatattatggactactggggtcaagg	IGHV14-3*01	13	14	92.9	IGHD1-1*01	15	16	93.8	IGHJ4*01	27	29	93.1	59	55	0.932203
4	attattgtgctcgaggccccttttcttactacggtgattcctactatgttatggactactggggtcaagg	IGHV14-3*01	9	9	100	IGHD1-1*01	5	5	100					14	14	1
4	actgtgctcgaggcccctcttcttactacgataattcctactatattatggactactggggtcaagg	IGHV14-3*01	9	9	100									9	9	1
4	gtgctcgaggcccctcttcttactacggtagttcctactttgttatggactactggggtcaagg													0	0
4	attactgtgctcgaggcccctcttcttactacggtagttcctactatgctatggactactggggtcaagg	IGHV14-3*01	13	14	92.9	IGHD1-1*01	15	16	93.8	IGHJ4*01	29	29	100	59	57	0.966102
4	tactgtgctcgaggcccctcttcttactacggtagttcctactatgttatggactactggggtcaaagg	IGHV14-3*01	11	12	91.7	IGHD1-1*01	15	16	93.8	IGHJ4*01	26	27	96.3	55	52	0.945455
4	attactgtgctcgaggcccctcctcttactacggtgattcctactatgttatggactactggggtcaagg	IGHV14-3*01	13	14	92.9	IGHD1-1*01	10	10	100	IGHJ4*01	28	29	96.6	53	51	0.962264
4	attactgtgctcgaggcccctcttcttattacggtgattcctattatgttatggactactggggtcaagg	IGHV14-3*01	13	14	92.9	IGHD1-1*01	11	13	84.6	IGHJ4*01	27	29	93.1	56	51	0.910714
4	gtgctcgaggcccctcttcttactacggtagttcctactatgttatggactactgggatcaagg	IGHV14-3*01	9	9	100									9	9	1
4	gtgcttgaggcccctcttcttactacggtgattcctactatgttatggactactggggtcaagg	IGHV14-3*01	10	10	100									10	10	1
4	attactgtgctcgaggcccctctccttactacggtagttcctactatgttatggactactggggtcaagg	IGHV14-3*01	13	14	92.9	IGHD1-1*01	13	13	100	IGHJ4*01	28	29	96.6	56	54	0.964286
4	actgtgctcgaggtccctcttcttactacggtagttcctactatattatggactactggggtcaagg													0	0	#NUM!
4	cgtactcgaggcccctcttcttactacggtgattcctactatgttatggactactggggtcaagg	IGHV14-3*01	9	9	100									9	9	1
3	gtgctcgaggcacctcttcttactacggtgattcctactatgttatggactactggggtcaagg													0	0	#NUM!
3	gtgctcgaggcctctcttcttactacggtagttcctactatattatggactactggggtcaagg													0	0	#NUM!
3	attactgtgctcgaggcccctcttcttactacagtgattcctactatgttatggactactggggtcaagg	IGHV14-3*01	13	14	92.9	IGHD1-1*01	11	13	84.6	IGHJ4*01	28	29	96.6	56	52	0.928571
3	tgtgctcgaggcccctcttcttactacggtagttcctactatattatggactacttgggtcaagg	IGHV14-3*01	9	9	100									9	9	1
3	tgtgctcgaggcccctcttcttactacggtagttcctactatgttatggactactggggtaaagg	IGHV14-3*01	9	9	100									9	9	1
3	gtgctcgaggcccctcttcttgctacggtagttcctactatgttatggactactggggtcaagg	IGHV14-3*01	9	9	100									9	9	1
3	attactgtactcgaggcccctcttcttactacggtgattcctactatgttattgactactggggtcaagg	IGHV14-3*01	9	9	100	IGHD1-1*01	6	6	100					15	15	1
3	gcgctcgaggcccctcttcttactacggtagttcctactatgttatggactactggggtcaagg	IGHV14-3*01	9	9	100									9	9	1
3	gttctcgaggcccctcttcttactacggtagttcctactatgttatggactactggggccaagg	IGHV14-3*01	9	9	100									9	9	1
3	ttgctcgaggcccctcttcttactacggtgattcctactatgttatggactactggggtcaagg	IGHV14-3*01	9	9	100									9	9	1
3	gtgctcgaggcccctcttcttactacggtagttcctactatattatggcctactggggccaagg													0	0
3	gtgctcgaggcccctcttcttattacggtagttcctactatgttatggactactggggccaagg	IGHV14-3*01	9	9	100									9	9	1
3	attactgtgcccgaggcccctcttcttactacggtagttcctactatgttatggactactggggtcaagg	IGHV14-3*01	12	14	85.7	IGHD1-1*01	6	6	100					20	18	0.9
3	attgtgctcgaggcccctcttcttactacggtgattcctactatgttatggactactgggatcaagg	IGHV14-3*01	9	9	100									9	9	1
3	gtgctcgaggcccctcttcttactacggtagttcctactatattatggactactagggtcaagg													0	0
3	attactgtgctcgaggtccctcttcttactacggtagttcctactatgttatggactactggggtcaagg	IGHV14-3*01	13	14	92.9	IGHD1-1*01	15	16	93.8	IGHJ4*01	28	29	96.6	59	56	0.949153
3	gtgctcgaggcccctcttcttactacggtagttcctactatgttatggactactggggtcaaga	IGHV14-3*01	9	9	100									9	9	1
3	catctattactgtgctcgaggcccctcttcttactacggtgattcctattatgttatggactactggggccaagg	IGHV14-3*01	18	19	94.7	IGHD1-1*01	12	13	92.3	IGHJ4*01	26	29	89.7	61	56	0.918033
3	gtgctcaaggcccctcttcttactacggtagttcctactatgttatggactactggggtcaagg													0	0	#NUM!
3	gtgttcgaggcccctcttcttactacggtgattcctactatgttattgactactggggccaagg	IGHV14-3*01	9	9	100									9	9	1
3	attactgtgctcgagacccctcttcttactacggtagttcctactatgttatggactactggggtcaagg	IGHV14-3*01	13	14	92.9	IGHD1-1*01	15	16	93.8	IGHJ4*01	28	29	96.6	59	56	0.949153
3	gtgctcgaggccccccttcttactacggtgattcctactatgttatggactactggggtcaagg													0	0	#NUM!
3	gtgctcgaggaccctcttcttactacggtgattcctactatgttatggactactggggtcaagg													0	0	#NUM!
3	attactgtgctcggggcccctcttcttactacggtagttcctactatgttatggactactggggtcaagg	IGHV14-3*01	11	11	100	IGHD1-1*01	15	16	93.8	IGHJ4*01	28	29	96.6	56	54	0.964286
3	gtgctcgaggcccctcttcttactacggtaattcctactatattatggactactggggccaagg	IGHV14-3*01	9	9	100									9	9	1
3	gtgttcgaggcccctcttcttactacggtgattcctactatgttatggactactggggccaagg	IGHV14-3*01	9	9	100									9	9	1
3	attactgtgctcgaggcccctcttcttactacggtagttcctactatgttatggactactgaggtcaagg	IGHV14-3*01	13	14	92.9	IGHD1-1*01	15	16	93.8	IGHJ4*01	27	29	93.1	59	55	0.932203
3	gtgctcgaggcccctctccttactacggtagttcctactatgttatggactactggggccaagg	IGHV14-3*01	14	17	82.4									17	14	0.823529
3	gtgctcgaggcccctcttcttactacggtaattcctactatgttattgactactggggtcaagg	IGHV14-3*01	9	9	100									9	9	1
3	tttactgtgctcgaggcccctcttcttactacagtagttcctactatgttatggactactggggtcaagg	IGHV14-3*01	12	13	92.3	IGHD1-1*01	14	16	87.5	IGHJ4*01	28	29	96.6	58	54	0.931034
3	gtgctcgaggcccctcttcttactacgatagttcctactatgttatggactactggggccaagg	IGHV14-3*01	9	9	100									9	9	1
3	attactgtgctcgaggcccctcttcttactacggcagttcctactatattatggactactggggtcaagg	IGHV14-3*01	13	14	92.9	IGHD1-1*01	14	16	87.5	IGHJ4*01	27	29	93.1	59	54	0.915254
3	gtgctcgaggcccctcttcttactacggtagtttatactatgttatggactactggggtcaagg	IGHV14-3*01	9	9	100									9	9	1
3	gtgctcgaggcccctcttcttactacggtagttcctactatattattgattactggggtcaagg	IGHV14-3*01	9	9	100									9	9	1
3	gtgctcgaggcccctcttcttactacggtgattcctactatgttatgaactactggggtcaagg	IGHV14-3*01	9	9	100									9	9	1
3	attactgtgctcgagtcccctcttcttactacggtgattcctactatgttatggactactggggtcaagg	IGHV14-3*01	13	14	92.9	IGHD1-1*01	12	13	92.3	IGHJ4*01	28	29	96.6	56	53	0.946429
3	actgtgctcgaggcccctcttcttactacggtagttcctactgtgttatggactactggggtcaagg	IGHV14-3*01	9	9	100									9	9	1
3	gtgctcgagtcccctcttcttactacggtagttcctactatattatggactactggggtcaagg													0	0
3	gtgctcgaggcccctcttcttactacggtgattcctactatgttatggcctactggggtcaagg	IGHV14-3*01	9	9	100									9	9	1
3	gtgctcgaggcccctcttcttactacggtgattcctactatgttatggactactggggttaaggg	IGHV14-3*01	9	9	100									9	9	1
2	actgtgctcgaggcccctcttcttactacggtgattcctactatgttatggactactgaggccaagg	IGHV14-3*01	9	9	100									9	9	1
2	attactgtgctcgaggcccctcttcttactacggtgattcctcctatgttatggactactggggtcaagg	IGHV14-3*01	13	14	92.9	IGHD1-1*01	12	13	92.3	IGHJ4*01	26	27	96.3	54	51	0.944444
2	attattgtactcgaggcccctcttcttactacggtgattcctactatgttatggactactggggtcaagg	IGHV14-3*01	9	9	100	IGHD1-1*01	5	5	100					14	14	1
2	gtgctcgaggcccctcttcttactacggtagttcctactatatgatggactactggggtcaagg	IGHV14-3*01	9	9	100									9	9	1
2	gtgctcgaggcccctcttcttactacggtgattcctactatgttatggactacttgggtcaagg	IGHV14-3*01	9	9	100									9	9	1
2	catctattactgtgctcgaggcccctcttcttactacggtagttcctactatattatggactactggggtcaagt	IGHV14-3*01	18	19	94.7	IGHD1-1*01	15	16	93.8	IGHJ4*01	26	28	92.9	63	59	0.936508
2	gtgctcgaggcccctcttcttactacgatatttcctactatgttatggactactggggtcaagg	IGHV14-3*01	9	9	100									9	9	1
2	gtgctcgaggcccctcttcttactacggtagttcctactatgttatgtactactggggtcaagg	IGHV14-3*01	9	9	100									9	9	1
2	gtgctcgaggcccctcttcttactacggtgattcctactatgttatagactactggggtcaagg	IGHV14-3*01	9	9	100									9	9	1
2	gtgctcgaggcccctcttcttactacggtagttcctactatgttatggattactggggtcaagg	IGHV14-3*01	9	9	100									9	9	1
2	attactgtgctcgaggcccctcttcttactacggtagttcctattatgttattgactactggggtcaagg	IGHV14-3*01	13	14	92.9	IGHD1-1*01	15	16	93.8	IGHJ4*01	26	29	89.7	59	54	0.915254
2	gtactcgaggcccctcttcttactacggtgattcctactatgttatggactactggggtcaaag	IGHV14-3*01	9	9	100									9	9	1
2	attactgtgttcgaggcccctcttcttactacggtagttcctactatattatggactactggggccaagg	IGHV14-3*01	12	14	85.7									14	12	0.857143
2	gtgctcgaggccccttcttcttactacggtagttcctactatgttatggactactggggtcaagg	IGHV14-3*01	9	9	100									9	9	1
2	gtgctcgaggcccctcttcttactacggtagttcctactatattatggactactggggacaagg													0	0
2	gtgctcgaggcccctcctcttactacggtagttcctactatgttatggactactggggccaagg	IGHV14-3*01	9	9	100									9	9	1
2	gtgcttgaggcccctcttcttactacggtagttcctactatgttatggactactggggtcaagg	IGHV14-3*01	10	10	100									10	10	1
2	gtgctcgaggcccctcttcttactacggtgattcctactatgttatggactactggggacaagg	IGHV14-3*01	9	9	100									9	9	1
2	gtgctcgaggcccctcttcttactacggtgatccctactatgttatggactactggggtcaagg	IGHV14-3*01	9	9	100									9	9	1
2	gtgctcgacgcccctcttcttactacggtagttcctactatgttatggactactggggtcaagg													0	0	#NUM!
2	gtgctcgagccccctcttcttactacggtagttcctactatattatggactactggggtcaagg													0	0
2	attactgtgctcgaggccccttttcttactacggtagttcctactatgttatggactactggggtcaagg	IGHV14-3*01	13	14	92.9	IGHD1-1*01	16	17	94.1	IGHJ4*01	28	29	96.6	60	57	0.95
2	gtgctcgaggccccgcttcttactacggtagttcctactatgttatggactactggggtcaagg													0	0	#NUM!
2	gtgctcgaggcccctcttcttactacggtagttcctactatattatggcctactggggtcaagg													0	0
2	gtgctcgaggcccctcttcttactacggtgattcctactatgtcatggactactggggtcaagg	IGHV14-3*01	9	9	100									9	9	1
2	cgcgctcgaggcccctcttcttactacggtagttcctactatattatggactactggggtcaagg													0	0
2	attactgtgctcgaggcccctcttcttactacggtagttcctactatgttatggactactggggtcaggg	IGHV14-3*01	13	14	92.9	IGHD1-1*01	15	16	93.8	IGHJ4*01	27	29	93.1	59	55	0.932203
2	actgtgctcgaggccactcttcttactacggtgattcctactatgttatggactactggggtcaagg													0	0	#NUM!
2	catctattactgtgctcgaggcccctcttcttactacggtagttcctactatcttatggactactggggtcaagg	IGHV14-3*01	18	19	94.7	IGHD1-1*01	15	16	93.8	IGHJ4*01	27	29	93.1	64	60	0.9375
2	gtgctcgaggcccctcttcttactacggtgattcctactatgttatggacttactggggtcaagg	IGHV14-3*01	9	9	100									9	9	1
2	gtgctcgaggccccccttcttactacggtagttcctactatattatggactactggggtcaagg													0	0
2	gtactcgaggcccctcttcttactacggtgattcctactatgttattgactactggggccaagg	IGHV14-3*01	9	9	100									9	9	1
2	gtgctcgaggcccctcttcttactacggaagttcctactatgttatggactactggggtcaagg	IGHV14-3*01	9	9	100									9	9	1
2	gtgctcgaggcccctcttcttactacggtagttcatactatgttatggactactggggtcaagg	IGHV14-3*01	9	9	100									9	9	1
2	gtgctcgaggcccctcttcttactacggtagttcctactatattatggactactggggtaaagg													0	0
2	gtgctcgaggcccctcttcttactacggtagttcctactatgttatggactactggagtcaagg	IGHV14-3*01	9	9	100									9	9	1
2	ggtgctcgaggccctcttcttactacggtagttcctactatattatggactactggggtcaagg													0	0
2	gtgatcgaggcccctcttcttactacggtagttcctactatgttatggactactggggtcaagg	IGHV14-3*01	12	14	85.7									14	12	0.857143
2	gtgctcgaggcccctcttcttactgcggtgattcctactatgttatggactactggggccaagg	IGHV14-3*01	9	9	100									9	9	1
2	atgctcgaggcccctcttcttactacggtagttcctactatgttatggactactggggtcaagg	IGHV14-3*01	9	9	100									9	9	1
2	gtgctcgaggcccctcttcttactacggtgattcctactatgttatgcactactggggtcaagg	IGHV14-3*01	9	9	100									9	9	1
2	gtgctcgaggcccctcttcttactacgttgattcctactatgttatggactactggggccaagg	IGHV14-3*01	9	9	100									9	9	1
2	gtgctcgaggcccctcttcttactacggtagttcctactatgttatggactactgggggtcaagg	IGHV14-3*01	9	9	100									9	9	1
2	gtgctcgaggcccctcttcttactacggtgattcctactatgttatggacactggggtcaaggg	IGHV14-3*01	9	9	100									9	9	1
2	ggtgctcgaggcccctcttcttactacggtagttcctactatgttatggactactgggggcaagg	IGHV14-3*01	9	9	100									9	9	1
2	gtgctcgaggcccctcttcttactatggtgattcctattatgttatggactactggggtcaagg	IGHV14-3*01	9	9	100									9	9	1
2	gtgctcgaggcccctcttcttactacggtagttcctactatattatggactacgggggtcaagg													0	0
2	gtgctcgaggcccctcttcttactacggtagttcctactatattatggactgctggggtcaagg	IGHV14-3*01	9	9	100									9	9	1
2	gtgctcgaggcccttcttcttactacggtagttcctactatattatggactactggggtcaagg													0	0	#NUM!
2	attgtgctcgaggcccctcttcttactacggtagtccctactatgttatggactactggggtcaagg	IGHV14-3*01	9	9	100									9	9	1
2	gtgctcgaagcccctcttcttactacggtgattcctactatgttatggactactggggtcaagg													0	0	#NUM!
2	gtgctcgagccccctcttcttactacggtagttcctactatgttatggactactggggtcaagg													0	0	#NUM!
2	gtgctcgaggcccctcttcttactacggcgattcctactatgttatggactactggggtcaagg	IGHV14-3*01	9	9	100									9	9	1
2	gtgctcgaggcccctcttcttactacggtgatttctactatgttatggactactggggtcaagg	IGHV14-3*01	9	9	100									9	9	1
2	gtgctcgaggcccctcttcttactacggtagttcctactatattatggactactgggaccaagg													0	0
2	ccgtgctcaaggcccctcttcttactacggtgattcctactatgttatggactactggggtcaagg													0	0	#NUM!
2	attactgtgctcgaggcccctcttcttctacggtgattcctactatgttatggactactggggtcaagg	IGHV14-3*01	13	14	92.9	IGHD1-1*01	7	7	100	IGHJ4*01	28	29	96.6	50	48	0.96
2	gtgctcgaggcccctcttcttaccacggtagttcctactatgttatggactactggggccaagg	IGHV14-3*01	9	9	100									9	9	1
2	gtgctcgaggcccctcttcttattacggtgattcctactatgttatggactactggggccaagg	IGHV14-3*01	9	9	100									9	9	1
2	catctattactgtgctcgaggcccctcttcttactacggtgattcctactatgttatggacaactggggtcaagg	IGHV14-3*01	18	19	94.7	IGHD1-1*01	12	13	92.3	IGHJ4*01	27	29	93.1	61	57	0.934426
2	attactgtgctctaggcccctcttcttactacggtagttcctactatattatggactactggggtcaagg	IGHV14-3*01	11	11	100									11	11	1
2	gtgctcgaggccgctcttcttactacggtgattcctactatgttatggactactggggtcaagg													0	0	#NUM!
2	gtactcgatgcccctcttcttactacggtgattcctactatgttatggactactggggtcaagg													0	0	#NUM!
2	gtgctcgacgcccctcttcttactacggtagttcctactatattatggactactggggtcaagg													0	0
2	gtgctcgagccccctcttcttactacggtgattcctactatgttatggactactggggtcaagg													0	0	#NUM!
2	gtgctcgaggcccctcttcttactacggtgattccgactatgttatggactactggggtcaagg	IGHV14-3*01	9	9	100									9	9	1
2	attactgtgctcgaggcccctcttcttactacggtagttcctactatgttattgattactggggccaagg	IGHV14-3*01	13	14	92.9	IGHD1-1*01	15	16	93.8	IGHJ4*01	25	29	86.2	59	53	0.898305
2	attactgtgctcgaggcccctcttcttactacggtgattcctactatgttatggactactagggtcaagg	IGHV14-3*01	13	14	92.9	IGHD1-1*01	12	13	92.3	IGHJ4*01	27	29	93.1	56	52	0.928571
2	catctattactgtgctcgaggcccctcttcttactacggtgattcctactatgttatggactactggggccaaga	IGHV14-3*01	18	19	94.7	IGHD1-1*01	12	13	92.3	IGHJ4*01	26	28	92.9	60	56	0.933333
2	gtgctcgaggcccctcttcttactacggtagttcctgctatattatggactactggggtcaagg													0	0
1	gtgctcgaggcccctcttcttactactgtagttcctactatattatggactactggggtcaagg	IGHV14-3*01	9	9	100									9	9	1
1	gtgttcgaggcccctcttcttactactttagttcctactatgttatggactactggggtcaagg	IGHV14-3*01	9	9	100									9	9	1
1	gtgctcgaggcccctcttcttactacgatagttcctattatattatggactactggggtcaagg													0	0
1	gtgctcgaggcccctcttcttactacgatagttcctattatattatggactactggggccaagg	IGHV14-3*01	9	9	100									9	9	1
1	gtgctcgaggcccctcttcttacgacggtagttcctactatgttatggactactggggccaagg	IGHV14-3*01	9	9	100									9	9	1
1	gtgctcgaggcccctcttctgactacggtagttcctactatgttatggactactggggtcaagg	IGHV14-3*01	9	9	100									9	9	1
1	gtgctcgaggcccctcttcttactacggtagttcctactatgttatggactacttggggtaaagg	IGHV14-3*01	9	9	100									9	9	1
1	gtgctcgaggcccctcttcttactacggtagtttcctactatattatggactactggggtcaagg													0	0
1	gtgctcgaggcccctcttcttactacggtagttcctactatgttgtggactactggggccaagg	IGHV14-3*01	9	9	100									9	9	1
1	gtgctcgaggcccctcttcttactacggtgatacctactatgttatggactactggggtcaagg	IGHV14-3*01	9	9	100									9	9	1
1	gtgctcgaggcccctcttcttactacggtgattccaactatgttatggactactggggtcaagg	IGHV14-3*01	9	9	100									9	9	1
1	gtgctcgaggctcctcttcttactacggtagttcctactatattatggactactggggccaagg													0	0	#NUM!
1	gtgctagaggcccctcttcttactacggtagttcctactatgttattgactactggggtcaagg	IGHV14-3*01	9	9	100									9	9	1
1	gttttcgaggcccctcttcttactacggtagttcctattatgttatggactactggggtcaagg	IGHV14-3*01	9	9	100									9	9	1
1	gtgctcgaggcccctcttcttactacgatgattcctactatattatggactactggggtcaagg	IGHV14-3*01	9	9	100									9	9	1
1	gtgctcgaggcccctcttcttactacggtagttcctgctatgttatggactactggggtcaagg	IGHV14-3*01	9	9	100									9	9	1
1	gtgctcgaggcccctcttcttactacggtgattcctactatcttatggactactggggtcaagg	IGHV14-3*01	9	9	100									9	9	1
1	gtgctcgaggcacctcttcttactacggtgattcctactatgttatggactactggggccaagg													0	0	#NUM!
1	gtgctcgaggcccctcctcttactacggtagttcctactatattatggactactggggccaagg	IGHV14-3*01	9	9	100									9	9	1
1	gtactcgaggcccctcttcttactacggtagttcctactatgttattgactactggggtcaagg	IGHV14-3*01	9	9	100									9	9	1
1	actgtgctcgaggcccctcttcttactacggtagttcctactatgttatggactactggggacaagg	IGHV14-3*01	9	9	100									9	9	1
1	gtgctcgaggcccctcttcctactacggtgattcctactatgttatggactactggggtcaagg	IGHV14-3*01	9	9	100									9	9	1
1	gtgctcgaggcccctcttcttactacggtagttcttactatgttatggactactggggccaagg	IGHV14-3*01	9	9	100									9	9	1
1	gtgctcgaggcccctcttcttactacggtagttcctactatattatggactctggggtcaagg													0	0
1	gtgctcgaggcccctcttcttactacggtgattcctactatgttatggattactggggccaagg	IGHV14-3*01	9	9	100									9	9	1
1	gtactcgaggcccttcttcttactacggtgattcctactatgttatggactactggggtcaagg													0	0	#NUM!
1	gtgttcgaggcccctcttcttactacggtagttcctactatcttatggactactggggtcaagg	IGHV14-3*01	9	9	100									9	9	1
1	gtgctcgaggcccctcttcttactacggtagttcctactatattatggactactggggtccagg													0	0
1	ttattactgtgctcgaggccccccttcttactacggtagttcctactatattatggactactggggtcaaag	IGHV14-3*01	14	15	93.3									15	14	0.933333
1	gtgctcgatgcccctcttcttactacggtagttcctactatgttattgactactggggccaagg													0	0	#NUM!
1	attaatgtgctcgaggcccctcttcttattacggtaattcctactatgttatggactactggggtcaagg	IGHV14-3*01	9	9	100									9	9	1
1	gtgctcgaggcccctattcttactacggtgattcctactatgttatggactactggggtcaagg	IGHV14-3*01	9	9	100									9	9	1
1	gtactcgaggcccctcttcttactacggtgattcctactatgttatggtctactggggtcaagg	IGHV14-3*01	9	9	100									9	9	1
1	gtgctcgaggcccctcttcttactacggtagttcctactatgttatggactactggggtcaagt	IGHV14-3*01	9	9	100									9	9	1
1	tgtgctcgaggcccctcttcttactacggtgattcctactattttattgactactggggccaagg	IGHV14-3*01	9	9	100									9	9	1
1	cgtactcgaggcccctcttcttactacggtgattcctactatgttatggactactggggccaagg	IGHV14-3*01	9	9	100									9	9	1
1	gtgctcgaggcccctcttcttactacggtagttcccattatgttatggactactggggtcaagg	IGHV14-3*01	9	9	100									9	9	1
1	gtgttcgaggtccctcttcttactacggtagttcctactatgttatggactactggggtcaagg													0	0	#NUM!
1	gtgctcgaggcccctcttcttactacggtagttcctactatattattgcctactggggccaagg													0	0
1	gtgctcgaggcccctcttcttattacagtgattcctactatgttatggactactggggtcaagg	IGHV14-3*01	9	9	100									9	9	1
1	gtgctcgaggcccctcttcttactacggtgattcctactatgttgttgactactggggccaagg	IGHV14-3*01	9	9	100									9	9	1
1	gtgctcgaggcccctcttcttactacggtagttcctactatattatggattactggggtcaagg													0	0
1	gtgctcgaggcccctcttcttactacggtagtttctactatattatggactactggggccaagg	IGHV14-3*01	9	9	100									9	9	1
1	gtgctcgaggcccctcttcttactacggtgattcctactatgttatggctactggggtcaaggg	IGHV14-3*01	9	9	100									9	9	1
1	gtgctcgaggcccctcttcttactacggtagttcctactatgttatggactcctggggtcaagg	IGHV14-3*01	9	9	100									9	9	1
1	gtgctcgaggccgctcttcttactacggtagttcctactatattatggactactggggtcaagg													0	0
1	gtgctcgaggcccctcttcttactacgttgattcctactatgttattgactactggggtcaagg	IGHV14-3*01	9	9	100									9	9	1
1	attactgtgctcgaggcccctcttcttactacggtagttcctactatgttatggcctactggggccaagg	IGHV14-3*01	13	14	92.9	IGHD1-1*01	15	16	93.8	IGHJ4*01	26	29	89.7	59	54	0.915254
1	gtgctcgaggcccctcttcttgctgcggtagttcctactatgttatggactactggggccaagg	IGHV14-3*01	9	9	100									9	9	1
1	gtgctcgaggcccctcttcttattacggtaattcctactatattatggactactggggtcaagg													0	0
1	agtgttcgaggcccctcttcttattacggtagttcctactatgttatggactactggggtcaagg	IGHV14-3*01	9	9	100									9	9	1
1	attactgtgctcgaggcccctccttcttactacggtagttcctactatgttatggactactggggtcaagg	IGHV14-3*01	13	14	92.9	IGHD1-1*01	15	16	93.8	IGHJ4*01	28	29	96.6	59	56	0.949153
1	gttctcgaggcccctcttcttactacggtagttcctactatgttattgactactggggccaagg	IGHV14-3*01	9	9	100									9	9	1
1	gtgctcgaggccccccttcttactacgatagttcctactatattatggactactggggtcaagg													0	0
1	gtgctcgaggcccctcttcttactacggtagttcctactatattatggactattgggttaaagg													0	0
1	gtgctcgagtcccctcttcttactacggtaattcctactatgttatggactactggggtcaagg													0	0	#NUM!
1	gtgctcgaggcccctcttcttactacggtacttcctactatgttattgactactggggtcaagg	IGHV14-3*01	9	9	100									9	9	1
1	gtgctcgaggcccctctccttactgcggtgattcctactatgttatggactactggggccaagg	IGHV14-3*01	14	17	82.4									17	14	0.823529
1	gtgctcgaggcccctcttctaactacgatagttcctactatattatggactactggggtcaagg	IGHV14-3*01	9	9	100									9	9	1
1	actggtgctcgaggcccctcttcttactacggtagtacctactatgttatggactactggggtcaagg	IGHV14-3*01	9	9	100									9	9	1
1	attattgtgttcgaggcccctcttcttactacggtagttcctactatgttatggactactggggtc	IGHV14-3*01	9	9	100	IGHD1-1*01	5	5	100					14	14	1
1	attactgtgcttgaggcccctcttcttactacggtagttcctattatgttatggactactggggtcaagg	IGHV14-3*01	13	14	92.9	IGHD1-1*01	15	16	93.8	IGHJ4*01	27	29	93.1	59	55	0.932203
1	gtgctcgaggcccctcttcttactacggtgattcgtactatgttatggactactggggtcaagg	IGHV14-3*01	9	9	100									9	9	1
1	gtgctcgaggcccctcttcttactacggtgattcctactatgttatggcctactggggccaagg	IGHV14-3*01	9	9	100									9	9	1
1	actgtgctcgaggcccctcttcttattacgttagttcctactatattatggactactggggtcaagg	IGHV14-3*01	9	9	100									9	9	1
1	gtgctcgaggcccctcttcttactacggtagttcctactatgttatggcctactggggtcaagg	IGHV14-3*01	9	9	100									9	9	1
1	gtgctcaaggcccctcttcttactacggtagttcctactatattatggactactggggacaagg													0	0	#NUM!
1	gtgctcgaggcctctcttcttactacggtgattcctactatgttatggactactggggccaagg													0	0	#NUM!
1	gtattcgaggcccctcttcttactacggtgattcctactatgttatggactactggggtcaagg	IGHV14-3*01	9	9	100									9	9	1
1	gtgctcgaggcccctcttcttactacggtagttcctattatattattgactactggggccaagg	IGHV14-3*01	9	9	100									9	9	1
1	gtgctcgaggcccctcttcttactacggtagttcctactatattatggactactggggtaaggg													0	0
1	attattgtgctcgaggcccctcttcttactacggtagttcctactatgttatggactactggggccaagg	IGHV14-3*01	9	9	100	IGHD1-1*01	5	5	100					14	14	1
1	gtgctcgaggcccctcttcttactacggtagtttcctactatgttatggactactggggccaagg	IGHV14-3*01	9	9	100									9	9	1
1	gtactcgaggcccctcttcttactacggtaattcctactatattatggactactggggtcaagg													0	0
1	gtgctcgaggcccctcttcttactacggtagttcctagtatattatggactactggggtcaagg	IGHV14-3*01	9	9	100									9	9	1
1	gtgctcgaggcccctcttcttactacggtgattcttattatgttatggactactggggtcaagg	IGHV14-3*01	9	9	100									9	9	1
1	gtgctcgaggcccctcttcgtactacggtagttcctactatattatggactactggggtcaagg													0	0
1	gtgctcgaggcccctcttcttactacgctgattcctactatgttatggactactggggtcaagg	IGHV14-3*01	9	9	100									9	9	1
1	gtgctcgaggcccctcttcttactacgttagttcctactatattattgactactggggccaagg	IGHV14-3*01	9	9	100									9	9	1
1	gtgctcgaggcccctcttcttactacggtagttcctaccatattatggactactggggtcaagg	IGHV14-3*01	9	9	100									9	9	1
1	actgtgctcgaggcccctcttcttactacggtgattcctactatgttatgggctactggggtcaagg	IGHV14-3*01	9	9	100									9	9	1
1	gaatctcgaggcccctcttcttactacggtgattcctactatgttatggactactggggtcaagg	IGHV14-3*01	9	9	100									9	9	1
1	gtgctcgaggcccctcttcttactacggtaattcctactatgttattgattactggggtcaagg	IGHV14-3*01	9	9	100									9	9	1
1	cgttctcgaggcccctcttcttactacggtagttcctactatgttatggactactggggtcaagg	IGHV14-3*01	9	9	100									9	9	1
1	gtactcgaggccctcttcttactacggtgattcctactatgttatggactactggggtcaagg													0	0	#NUM!
1	gtgctcgaggcccctcttcttactacggtaggtcctactatattatggactactggggccaagg	IGHV14-3*01	9	9	100									9	9	1
1	gtgctcgaggcccctcttcttactacggtagctcctactatgttatggactactggggccaagg	IGHV14-3*01	9	9	100									9	9	1
1	gtgctcgaggcccctcttcttactacggtgattcctactatggtatggactactggggtcaagg	IGHV14-3*01	9	9	100									9	9	1
1	gtgctcgaggcccctcttcttactacggtagttcctactatattatggactacttgggttaaagg													0	0
1	gtgctcgaggcccctcttcttactacggtgattcccactatgttattgactactggggccaagg	IGHV14-3*01	9	9	100									9	9	1
1	gtgctcgaggccccacttcttactacggtgattcctactatgttatggactactggggtcaagg													0	0	#NUM!
1	gtgctcgaggcccctcttcttactacggtagtttatactatgttatggactactggggccaagg	IGHV14-3*01	9	9	100									9	9	1
1	gtgctcgaggcccctcttcttactacgatagttcctactatgttatggactacaggggtcaagg	IGHV14-3*01	9	9	100									9	9	1
1	gtgctcgaagcccctcttcttactgcggtagttcctactatgttatggactactggggtcaagg													0	0	#NUM!
1	gtgctcgaggcccctcttcttattacggtagttcctactatgttatggactactggggtcaaga	IGHV14-3*01	9	9	100									9	9	1
1	gtactcgaggcccctcttcttactacggtagttcctactatgttatggactactggggtcagggaatcgat	IGHV14-3*01	9	9	100									9	9	1
1	gtgctcgaggcccctcttcttactacggtagttcctactatattatggattactggggccaagg	IGHV14-3*01	9	9	100									9	9	1
1	gtacccgaggcccctcttcttactacggtgattcctactatgttatggactactggggtcaagg	IGHV14-3*01	9	9	100									9	9	1
1	catctattattgtgttcgaggcccctcttcttattacggtagttcctactatgttatggactactggggtcaagg	IGHV14-3*01	16	19	84.2	IGHD1-1*01	14	16	87.5	IGHJ4*01	28	29	96.6	64	58	0.90625
1	gtggtcgaggcccctcttcttactacggtagttcctactatattatggactactggggtcaagg													0	0
1	tattactgtgctcgaggcccctcttcttactacgggagttcctactatgttatggactactggggtc	IGHV14-3*01	14	15	93.3	IGHD1-1*01	14	16	87.5	IGHJ4*01	24	25	96	56	52	0.928571
1	gtgctcgaggcccctcttcttactacgatagttcttactatgttatggactactggggtcaagg	IGHV14-3*01	9	9	100									9	9	1
1	attactgtgctcgaggcccctcttcttactacggcgattcctactatgttatggactactggggccaagg	IGHV14-3*01	13	14	92.9	IGHD1-1*01	11	12	91.7	IGHJ4*01	27	29	93.1	55	51	0.927273
1	tctattactgtgctcgaggcccctcttcttactacggtgattcctactatgttatggactactggggtccaagg	IGHV14-3*01	16	17	94.1	IGHD1-1*01	12	13	92.3	IGHJ4*01	24	25	96	55	52	0.945455
1	gtgctcgaggcccctcttcttactacggtgattcccactatgttatggactactggggtcaagg	IGHV14-3*01	9	9	100									9	9	1
1	tgtgctcgaggcccctcttcttacttcggtgattcctactatgttatggactactggggtcaagg	IGHV14-3*01	9	9	100									9	9	1
1	gtgctagaggcccctcttcttactacggtagttcctactatattattgactactggggtcaagg	IGHV14-3*01	9	9	100									9	9	1
1	gtgctcgaggcccctcttcgtactacggtgattcctactatgctatggactactggggtcaagg	IGHV14-3*01	9	9	100									9	9	1
1	tgtgttcgaggcccctcttcttactacggtggttcctactatgttatggactactggggtcaagg	IGHV14-3*01	9	9	100									9	9	1
1	actgttctcgaggcccctcttcttactacggtagttcctactatattattgactactggggtcaagg	IGHV14-3*01	9	9	100									9	9	1
1	gtactcgaggcccctcttcttactacgatgattcctactatgttatggactactggggtcaagg	IGHV14-3*01	9	9	100									9	9	1
1	attactgtactcgaggcccctcttcttactacggtgattcctactatgttatggaccactggggtc	IGHV14-3*01	9	9	100	IGHD1-1*01	6	6	100					15	15	1
1	gtgctcgaggcccctcttcttattacggtagttcctactatattattgactactggggccaagg	IGHV14-3*01	9	9	100									9	9	1
1	gtgctcgaggcccctcttcttactacggtagttcctactgtgttattgactactggggccaagg	IGHV14-3*01	9	9	100									9	9	1
1	gtgctcgaggcccctcttcttactacggtagttcctactatgttatggacttactggggtcaagg	IGHV14-3*01	9	9	100									9	9	1
1	gtgctcgaggcccctcttcttactacggtacttcttactatgttatggactactggggtcaagg	IGHV14-3*01	9	9	100									9	9	1
1	atgctcgaggcccctcttcttactacggtagttcctactatattatggactactggggtcaagg													0	0
1	gtgctcgaggcccctcttcttgctacggtgattcctattatgttatggactactggggtcaagg	IGHV14-3*01	9	9	100									9	9	1
1	tactgtgctcgaggcccctcttcttactacgctagtttctactatattatggactactggggtcaagg	IGHV14-3*01	11	12	91.7	IGHD1-1*01	14	16	87.5	IGHJ4*01	27	29	93.1	57	52	0.912281
1	gtgctcgaggcccctcttcttactacggtagttcccactatgttattgcttactggggccaagg													0	0
1	actgtgctcgaggcccctcttcttactacggtagttcctactatgttatggactactggggcccaagg	IGHV14-3*01	9	9	100									9	9	1
1	gtgctcgaggcccctcttcttactatggtgattcctactatgttatggactactggggccaagg	IGHV14-3*01	9	9	100									9	9	1
1	gtgctcgagcccctcttcttactacggtagttcctactatgttatggactactggggtcaagg													0	0	#NUM!
1	gtactcgaggcccctcttcttactacggtagttcctattatgttattgactactggggccaagg	IGHV14-3*01	9	9	100									9	9	1
1	gtgctcgaggcccctattcttactacggtgattcctactatgttatggactactggggccaagg	IGHV14-3*01	9	9	100									9	9	1
1	gtgctcgaggcccctcttcttactacggtagctcctactatattatggactactggggccaagg	IGHV14-3*01	9	9	100									9	9	1
1	gtgctcgaggcccctcttcttactacggtgattcctacgatgttatggactactggggtcaagg	IGHV14-3*01	9	9	100									9	9	1
1	gcgctcgaggcccctcttcttattacggtgattcctactatgttatggactactggggtcaagg	IGHV14-3*01	9	9	100									9	9	1
1	gtgctcgaggcccctcttcttactgcggtgattcctactatgttatggactacgggggtcaagg	IGHV14-3*01	9	9	100									9	9	1
1	gtgctcgaggcccctcttcttactacggcgattcctattatgttatggactactggggtc	IGHV14-3*01	9	9	100									9	9	1
1	gtgctcgaggccactcttcttactacggtagttcctactatgttatggattactggggtcaagg													0	0	#NUM!
1	gtgctcgatgcccctcttcttactacggtgattcctactattttatggactactggggtcaagg													0	0	#NUM!
1	gtgctcgaggcccctcttcttactacggtagttcctactatgttatggactactagggccaagg	IGHV14-3*01	9	9	100									9	9	1
1	attactgtgctcgaggaccctcttcttactacgttagttcctactatattatggactactggggtcaagg	IGHV14-3*01	13	14	92.9	IGHD1-1*01	14	16	87.5	IGHJ4*01	27	29	93.1	59	54	0.915254
1	agtttttcgaggcccctcttcttactacggtagttcctactatgttatggactactggggtcaagg	IGHV14-3*01	9	9	100									9	9	1
1	gtgctcgaggcccctcttcttactacggtagttcctactatattgtggactactggggtcaagg													0	0
1	actgtgctcgaggcccctcttcttactacggcatttcctactatgttatggactactggggtcaagg	IGHV14-3*01	9	9	100									9	9	1
1	attactgtgttcgaggcccctcttcttactacggtagttcctactatgttatggactactggggtc	IGHV14-3*01	12	14	85.7									14	12	0.857143
1	gttctcgaggcccctctccttactacggtagttcctactatattatggactactggggtcaagg	IGHV14-3*01	14	17	82.4									17	14	0.823529
1	gtactcgaggcccctcttcttactacggtagttcctattatgttattgactactggggtcaagg	IGHV14-3*01	9	9	100									9	9	1
1	gtgctcgacgcccctcttcttattacggtagttcctactatattatggactactggggtcaagg													0	0
1	gttttcgaggcccctcttcttactacggtgattcctactatgttatggactactggggtcaagg	IGHV14-3*01	9	9	100									9	9	1
1	gttagaggcccctcttcttactacggtagttcctactatgttatggactactggggtcaagg	IGHV14-3*01	9	9	100									9	9	1
1	ttgctcgaggcccctcttcttacgacggtgattcctactatgttatggactactggggccaagg	IGHV14-3*01	9	9	100									9	9	1
1	gtgcgcgaggcccctcttcttactacggtagttcctactatattatggactactggggtcaagg													0	0
1	gtgctcgaggcccctcttcttactacggtgattcctactatgttatggattactggggtcaagg	IGHV14-3*01	9	9	100									9	9	1
1	attactgtaatcgaggcccctcttcttactacggtgattcctactatgttatggactactggggtcaagg	IGHV14-3*01	9	9	100	IGHD1-1*01	5	5	100					14	14	1
1	attactgtgctcgatgcccctcttcttactacggtaattcctactatattatggactactggggtcaagg	IGHV14-3*01	13	14	92.9	IGHD1-1*01	13	14	92.9	IGHJ4*01	27	29	93.1	57	53	0.929825
1	gtgctcgaggcccctcttcttactatgatagttcctactatattatggactactggggtcaagg	IGHV14-3*01	9	9	100									9	9	1
1	gtgctcgaggcccctcttcttactacggtagttcatactatgttattgactactggggccaagg	IGHV14-3*01	9	9	100									9	9	1
1	gtgctcgaggcccctcttcttactacggtagttccgactatgttatggactactggggccaagg	IGHV14-3*01	9	9	100									9	9	1
1	gtgctcgaggcccctcttcttgctacggtagttcctactatattatggactactggggccaagg	IGHV14-3*01	9	9	100									9	9	1
1	gtgctcgaggcccctcttcttactacggtagttcctactatgttatggactactggggtccaagg	IGHV14-3*01	9	9	100									9	9	1
1	attacagtgctcgaggcccctcttcttactacgatagttcctactatattatggattactggggtcaagg													0	0
1	attactgtactcgaggcccctcttcttactacggtgattcttactatgttatggactactggggtcaagg	IGHV14-3*01	9	9	100	IGHD1-1*01	6	6	100					15	15	1
1	gtgctagaggcccctcttcttactacggtagttcctactatattatggactactggggccaagg	IGHV14-3*01	9	9	100									9	9	1
1	gtgctcgaggcccctcttcttactacggtagttcctactatattatggactgctggggccaagg	IGHV14-3*01	9	9	100									9	9	1
1	actttgctagaggcccctcttcttactacggtgattcctactatgttatggactactggggtcaagg	IGHV14-3*01	9	9	100									9	9	1
1	gtgctcgaggcccctcttcttactacggtagttcctactatattatggactactggggccaaga	IGHV14-3*01	9	9	100									9	9	1
1	gtgctcgaggcccatcttcttactacggtgattcctactatgttatggactactggggtcaagg													0	0	#NUM!
1	gtgctcgaggcccctcttcttactacggtagttcccactatgttatggactactggggtcaagg	IGHV14-3*01	9	9	100									9	9	1
1	gtgctcgaggctcctcttcttactacggtgattcctactattttattgactactggggccaagg													0	0	#NUM!
1	gtctcgaggcccctcttcttactacggtgattcctactatgttatggactactggggtcaagg	IGHV14-3*01	9	9	100									9	9	1
1	attactgtggtcgaggcccctcttcttactacggtagttcctactatgttatggactactggggtcaagg	IGHV14-3*01	12	14	85.7	IGHD1-1*01	15	16	93.8	IGHJ4*01	28	29	96.6	59	55	0.932203
1	gtgttcgaggctcctcttcttactacggtagttcctactatattatggactactggggtcaagg													0	0
1	gtgctcgaggcccctcttcttattacggtgattcctactatattatggactactggggtcaagg													0	0
1	gtgttcgaggcccctcttcttactactgtagttcctactatgttatggactactggggtcaagg	IGHV14-3*01	9	9	100									9	9	1
1	gtgctcgaggcccctcttcttactgcggtagttcctattatgttatggactactggggtcaagg	IGHV14-3*01	9	9	100									9	9	1
1	gtactcgaggcccctcttcttattacggtagttcctactatgttatggactactggggtcaagg	IGHV14-3*01	9	9	100									9	9	1
1	gtgctcgagcccccctcttcttactacggtagttcctactatgttatggactactggggtcaagg													0	0	#NUM!
1	gtgctcgaggcccctcttcttactacggtagttcctcctatattatggactactggggtcaagg													0	0
1	gtgctcgaggcccctcttcttactacggtgattactactatgttatggactactggggtcaagg	IGHV14-3*01	9	9	100									9	9	1
1	gctcgaggcccctcttcttactacggtagttcctaccatgttatggactactggggtcaagg	IGHV14-3*01	9	9	100									9	9	1
1	gtgctcgaggcccctcttcttattacgatagttcctactatattatggactactggggtcaagg													0	0
1	gtgctcgaggcccctcttcttactacggtagttcctactatgttattgactactggggacaagg	IGHV14-3*01	9	9	100									9	9	1
1	actgtgctagaggcccctcttcttactacggtgattcctactatgttatggactactggggtcaagg	IGHV14-3*01	11	11	100	IGHD1-1*01	12	13	92.3	IGHJ4*01	28	29	96.6	53	51	0.962264
1	gtgctcgaggcccctcttcttactacggtgattcctactatgttatggactactggggccaggg	IGHV14-3*01	9	9	100									9	9	1
1	gtgctcgaggcccctcttcttactacggtagttcctactatattatgaactactggggtcaagg	IGHV14-3*01	9	9	100									9	9	1
1	tactgtgctcgaggccctcttcttactacggtagttcctactatattatggactactggggtcaagg	IGHV14-3*01	11	12	91.7	IGHD1-1*01	15	16	93.8	IGHJ4*01	27	29	93.1	57	53	0.929825
1	actgtgcgcgaggcccctcttcttactacggtagttcctactatgttatggactactggggtcaagg	IGHV14-3*01	9	9	100									9	9	1
1	gtgctcgaggcccctcttcttactacggtagttcctactatattattgacttactggggccaagg													0	0
1	gttctcgaggcccctcttcttactacggtaattcctactatgttatggactactggggtcaagg	IGHV14-3*01	9	9	100									9	9	1
1	gtgctcgatgcccctcttcttactacggtagttcctactatattattgactactggggtcaagg													0	0	#NUM!
1	actgtgctcgaggcccctcttcttactacgatacttcctactatattatggactactggggtcaagg	IGHV14-3*01	9	9	100									9	9	1
1	attactgtgctcgaggcccctcttcttactacggtagtatctactatattatggactactggggtcaagg	IGHV14-3*01	13	14	92.9	IGHD1-1*01	16	17	94.1	IGHJ4*01	27	29	93.1	60	56	0.933333
1	gtgctcgaggcccctcttcttactacggtagttcttattatgttatggactactggggccaagg	IGHV14-3*01	9	9	100									9	9	1
1	gcgctcgaggcccctcttcttactacggtgattcctactatgttatggactactggggccaagg	IGHV14-3*01	9	9	100									9	9	1
1	actgtgctcgaggcccctcttcttactacgaagattcctactatgttatggactactggggtcaagg	IGHV14-3*01	9	9	100									9	9	1
1	gtgctcgaggcccatcttcttactacggtgattcctactatgttatggactactggggccaagg													0	0	#NUM!
1	gtgctcgaggccccccttcttactacggtgattcctactatgttattgactactggggccaagg													0	0	#NUM!
1	gtgctcgaggcccctcttcttaccgcggtgattcctactatgttatggactactggggccaagg	IGHV14-3*01	9	9	100									9	9	1
1	gtgctcgaggcccctcttcttactacggtgattcctactatgttatggactactggtgtcaagg	IGHV14-3*01	9	9	100									9	9	1
1	gcgctcgaggcccctcttcttactacggtgattcctactatgttatggcctactggggtcaagg	IGHV14-3*01	9	9	100									9	9	1
1	gcgctcgaggcccctcttcttactacggtagttcctactatgttatggactactggggccaagg	IGHV14-3*01	9	9	100									9	9	1
1	gtgctcgaggcccctcttcttactacggtagttcctactatgttatggactattggggtaaagg	IGHV14-3*01	9	9	100									9	9	1
1	gtgttcgaggcccctcttcttactacggtagttccgactatgttatggactactggggtcaagg	IGHV14-3*01	9	9	100									9	9	1
1	attactgtgctcgaggcccctcttcttactacggtgattcctactatgttatggactactgggttcaagg	IGHV14-3*01	13	14	92.9	IGHD1-1*01	12	13	92.3	IGHJ4*01	27	29	93.1	56	52	0.928571
1	gtgctcgaggcccctcttcctactacggtgattcctactatgttatggactactggggccaagg	IGHV14-3*01	9	9	100									9	9	1
1	gtgctcgaggcccctcttcttactacggtgattcctactatgctatggactactggggccaagg	IGHV14-3*01	9	9	100									9	9	1
1	gtgctcgaggcccctcttcttactacggtggttcctattatgttatggactactggggtcaagg	IGHV14-3*01	9	9	100									9	9	1
1	gtgttcgaggcccctcttcttactgcggtagttcctactatgttatggactactggggtcaagg	IGHV14-3*01	9	9	100									9	9	1
1	gtgttcgaggcccctcttcttactacggtgattcctactatgtaatggactactggggtcaagg	IGHV14-3*01	9	9	100									9	9	1
1	catctattactgtactcgaggcccctcttcttactacggtagttcttactatgttatggactactggggtcaagg	IGHV14-3*01	17	19	89.5	IGHD1-1*01	15	16	93.8	IGHJ4*01	29	30	96.7	65	61	0.938462
1	gtactcgaggcccctcttcttattacggtgattcctactatgttatggactactggggtcaagg	IGHV14-3*01	9	9	100									9	9	1
1	gtgctcgaggcccctcttcttactacggtgatacctactatgttatggactactggggccaagg	IGHV14-3*01	9	9	100									9	9	1
1	gtgctcgaggcccctcttcttactacggtgattcctgctatgttatggactactggggtcaagg	IGHV14-3*01	9	9	100									9	9	1
1	gtgctcgaggcccctctccttactacggtgattccgactatgttatggactactggggtcaagg	IGHV14-3*01	14	17	82.4									17	14	0.823529
1	gtgttcgaggccccttttcttactacggtagttcctactatgttatggactactggggtcaagg	IGHV14-3*01	9	9	100									9	9	1
1	gtgctcgaggcccctcttcttactacggtgattcctactatgttatggactactggggcaagg	IGHV14-3*01	9	9	100									9	9	1
1	attactgtgctcgaggcccgtcttcttactacggtagttcctactatgttatggactactggggtcaagg	IGHV14-3*01	13	14	92.9	IGHD1-1*01	15	16	93.8	IGHJ4*01	28	29	96.6	59	56	0.949153
1	gtgctcgaggcccctcttcttactacgttagttcctactatattatggactactggggccaagg	IGHV14-3*01	9	9	100									9	9	1
1	attactgtgctcgaggcccctcttcttactacgttagttcctactatgttattgactactggggccaagg	IGHV14-3*01	13	14	92.9	IGHD1-1*01	14	16	87.5	IGHJ4*01	26	29	89.7	59	53	0.898305
1	gtgctcgaggcccctcttcttactacggtagttcccactatattatggactactggggccaagg	IGHV14-3*01	9	9	100									9	9	1
1	gtgctagaggcccctcttcttacgacggtagttcctactatattatggactactggggtcaagg	IGHV14-3*01	9	9	100									9	9	1
1	gtgctcgaggctcctcttcttactacggtagttcctactatgttatggactactggggccaagg													0	0	#NUM!
1	attactgtgctcgaggcccctcttcttactacggtgtttcctactatgttatggactactggggtcaagg	IGHV14-3*01	13	14	92.9	IGHD1-1*01	12	13	92.3	IGHJ4*01	28	29	96.6	56	53	0.946429
1	gtgctcgaggcccctcttctaactacggtagttcctactatgttatggactactggggtcaagg	IGHV14-3*01	9	9	100									9	9	1
1	gtgctcgaggcccctcttcttactacggtagttcctactatgttatggactacttgggttaaagg	IGHV14-3*01	9	9	100									9	9	1
1	attactgtgctcgaggcccctcttcttactacggtgattcctactacgttatggactactggggtcaagg	IGHV14-3*01	13	14	92.9	IGHD1-1*01	12	13	92.3	IGHJ4*01	27	29	93.1	56	52	0.928571
1	gtgctcgaggtccctcttcttactacggtaattcctactatattatggactactggggtcaagg													0	0
1	gtgctcgaggcccctcttcttactacggtagttcctactatattatggactactgggggcaagg													0	0
1	acagctcgaggcccctcttcttactacggtgattcctactatgttatggactactggggtcaagg	IGHV14-3*01	9	9	100									9	9	1
1	cgagctcgaggcccctcttcttactacggtgattcctactatgttatggactactggggtcaagg	IGHV14-3*01	9	9	100									9	9	1
1	gtgctcgaggcccctcttcttactagggtagttcctactatgttatggactactggggtcaagg	IGHV14-3*01	15	20	75									20	15	0.75
1	aataatgtgctcgaggccccctcttcttactacggtagttcctactatgttatggactactggggtcaagg													0	0	#NUM!
1	gtgctcgaggcccctcttcttactacggtagttcctactatgttatggactactagggtcaagg	IGHV14-3*01	9	9	100									9	9	1
1	gtgctcgaggcccctcttcttactacggtagttcctactatattatggaactactggggtcaagg													0	0
1	gtgctcgaggcccctcttcttactacggtagttcctactattttatggactactggggttaagg	IGHV14-3*01	9	9	100									9	9	1
1	gtgctcgaggcccctcttcttactgcggtagttcctactatgttatggactactggggccaagg	IGHV14-3*01	9	9	100									9	9	1
1	gtgctcgaggcccctcttcttattatggtagttcctactatattatggactactggggtcaagg													0	0
1	gtgctcgaggcccctcttcttattacggtgattcctactatgctatggactactggggtcaagg	IGHV14-3*01	9	9	100									9	9	1
1	gtgctcgaggcccctcttcatactacggtgattcctactatgttatggactactggggtcaagg	IGHV14-3*01	9	9	100									9	9	1
1	gtgctcgaggcccctcttcttactacggtagttcctactatgttatggactactggggccaaag	IGHV14-3*01	9	9	100									9	9	1
1	ggtgctcgaggcccctcttctcactacggtagttcctactatgttatggactactggggccaagg	IGHV14-3*01	14	17	82.4									17	14	0.823529
1	catctattattgtgctcgaggcccctcttcttactacggtagtttctactatattatggactactggggtcaagg	IGHV14-3*01	17	19	89.5	IGHD1-1*01	15	16	93.8	IGHJ4*01	27	29	93.1	64	59	0.921875
1	gtgctcgaggcccctcttcttactacggtagttcctactatgttatggactacctggggtcaagg	IGHV14-3*01	9	9	100									9	9	1
1	gtgctcgaggcccctctccttactgcggtgattccgactatgttatggactactggggtcaagg	IGHV14-3*01	14	17	82.4									17	14	0.823529
1	gtgctcgaggcccctcttcttactacggtgattcctactatgttatggactactggggccaaag	IGHV14-3*01	9	9	100									9	9	1
1	gtgctcgaggccccttttcttactacggtgattcctactatgttatggactactggggccaagg	IGHV14-3*01	9	9	100									9	9	1
1	gtgctcgaggcccctcttctgactacggtgattcctactatgttattgactactggggccaagg	IGHV14-3*01	9	9	100									9	9	1
1	cgtgctcgaggcccctcttcttactacggtgcttcctactatgttatgcactactggggtcaagg	IGHV14-3*01	9	9	100									9	9	1
1	gtgctcgaggccccctcttcttactacggtagttcctactatattatggactactggggtcaagg													0	0
1	gtactcgaggcccctcttcttactacggtgattcctactatgttatggattactggggtcaagg	IGHV14-3*01	9	9	100									9	9	1
1	gtgctcgaggcccctcttcttactacggtagttcctactttgttcttgattactggggccaagg	IGHV14-3*01	9	9	100									9	9	1
1	gttctcgaggcccctcttcttactacggtagttcctactatgttattgactactggggcaaagg	IGHV14-3*01	9	9	100									9	9	1
1	gtgttcgaggcccctcttcttcctgcggtagttcctactatgttatggactactggggtcaagg	IGHV14-3*01	9	9	100									9	9	1
1	gtgctcgaggcccctcttcttactacggtagttcatactatattatggactactggggtcaagg	IGHV14-3*01	9	9	100									9	9	1
1	gtgcttgaggcccctcttcttactacggtagttcctactatattatggactactggggtcaagg	IGHV14-3*01	10	10	100									10	10	1
1	gttctcgaggcccctcttcttactacggtagttcctactattttatggactactggggtcaagg	IGHV14-3*01	9	9	100									9	9	1
1	gtgttcgaggcccctcttcttactactatagttcctactatgttatggactactggggtcaagg	IGHV14-3*01	9	9	100									9	9	1
1	gtgctcgaggcccctcttcttactacggtagttcctactatattatggactaatggggtcaagg													0	0
1	gtgctcgagtcccctcttcttactacggtagttcctactatgttatggactactggggccaagg													0	0	#NUM!
1	gtgctcgaggcccctcttcttactacggtagttcctactatattatggactcctggggtcaagg	IGHV14-3*01	9	9	100									9	9	1
1	gtgctcgaggcccctcttcttattacggtgattcctactatgttatggactactagggtcaagg	IGHV14-3*01	9	9	100									9	9	1
1	gtgctcgaggccccccttcttactacggtgattcctactatgttatggactactggggccaagg													0	0	#NUM!
1	gtgcttgaggcccctcttcttactacggtggttcctactatgttatggactactggggtcaagg	IGHV14-3*01	10	10	100									10	10	1
1	actgtgctcgaagcccctcttcttactacggtagttcctactatattatggactactggggtcaagg													0	0	#NUM!
1	gtgctcgaggcccctcttcttactacggtgattcctactatgttatggactactgggaccaagg	IGHV14-3*01	9	9	100									9	9	1
1	gtgctcgaggcccctcttcttacgacggtagttcctattatgttatggactactggggtcaagg	IGHV14-3*01	9	9	100									9	9	1
1	gtgctcgaggcccctcttcttactacggtagttcctactatgttattgattactggggtcaagt	IGHV14-3*01	9	9	100									9	9	1
1	attactgtgctcgaggcccctcttattactacggtagttcctactatgttatggactactggggtcaagg	IGHV14-3*01	13	14	92.9	IGHD1-1*01	16	16	100	IGHJ4*01	28	29	96.6	59	57	0.966102
1	gtgctcgaggcccctcttcttactacggtagatcctactatattatggactactggggtcaagg													0	0
1	gtgctcgaggcccctcttcttactacgatgattcctactatgttatggactactggggccaagg	IGHV14-3*01	9	9	100									9	9	1
1	gttgctcgaggcccctcttcttactacggtaattcctactatgttatggactactggggtcaagg	IGHV14-3*01	9	9	100									9	9	1
1	gtgctcgaggccccctcttcttactacggtgattcctactatgttatggactactggggtcaagg													0	0	#NUM!
1	gtgctcgaggcccctcttctgactacggtagttcctactatattatggactactggggtcaagg													0	0
1	gtgctcgaggctcctcttcttactacggtagttcctactatattatggactactggggacaagg													0	0
1	ttgttcgaggcccctcttcttactacggtagttcctactatgttatggactactggggtcaaggatcgatcgt	IGHV14-3*01	9	9	100									9	9	1
1	attactgtgctcgaggcccctcttcttactacggtgattcctactatgttatggactacgggggtcaagg	IGHV14-3*01	13	14	92.9	IGHD1-1*01	12	13	92.3	IGHJ4*01	27	29	93.1	56	52	0.928571
1	gtgctcgaggcccctcttcttactacggtaattcctattatattatggactactggggtcaagg													0	0
1	gtgctcgaggcccctcttcttactacggtagttcctactatgttatggactacgggggacaagg	IGHV14-3*01	9	9	100									9	9	1
1	gtgctcgaggcccctcttcttactacggtagttcctactatactatggactactggggtcaagg													0	0
1	gtgctcgaggcccctcttcttaatacggtagttcctactatattatggactactggggtcaagg													0	0
1	gtgctcgaggcccctcttcttactacggtagttcctactatgttatggactactggggttaagg	IGHV14-3*01	9	9	100									9	9	1
1	attactgtgctcgaggcccctcttcttactacgttagttcctattatattatggactactggggtcaagg	IGHV14-3*01	13	14	92.9	IGHD1-1*01	14	16	87.5	IGHJ4*01	26	29	89.7	59	53	0.898305
1	gtgctcgaggcccctcttcttactacggtgattcctactatgttatggactactggggtcaagc	IGHV14-3*01	9	9	100									9	9	1
1	gtgctcgaggcccctcttcttactacggtagttcctactatgttatggactacgggggtcaagg	IGHV14-3*01	9	9	100									9	9	1
1	gtgctcgaggcccctcttcttactacggtaggtcctactatgttatggactactggggtcaagg	IGHV14-3*01	9	9	100									9	9	1
1	gtgctcgaggcccttcttcttactacggtagttcctactatgttatggactactggggccaagg													0	0	#NUM!
1	gcgctcgaggcccctcttcttactacggtgattcctactatgttatggactactggggtcaagg	IGHV14-3*01	9	9	100									9	9	1
1	attactgtgctcgaggcccctcttcttactacggtagttcctactatgttatggactactggggtcgagg	IGHV14-3*01	13	14	92.9	IGHD1-1*01	15	16	93.8	IGHJ4*01	27	29	93.1	59	55	0.932203
1	gttttcgaggcccctcttcttactacggtagttcctactatgttatggactactggggtcaagg	IGHV14-3*01	9	9	100									9	9	1
1	gtgctcgatgcccctcttcttactacggtagttcctactatgttatggactactggggccaagg													0	0	#NUM!
1	gtgctcgaggcccctcttcttactacggtagttcctactatattatggactactggtgtcaagg													0	0
1	ttgctcgaggcccctcttcttactacggtgattcctactatgttatggactactggggccaagg	IGHV14-3*01	9	9	100									9	9	1
1	gtgctcgaggcccctcttcttactacggtagttcctactatattatagactactggggtcaagg	IGHV14-3*01	9	9	100									9	9	1
1	gtgctcgaggcccctcttcttactacggtagttcctactatattatggacgactgggggcaagg													0	0
1	gtactcgaggcccctcctcttactacggtagttcctactatgttatggactactggggtcaagg	IGHV14-3*01	9	9	100									9	9	1
1	attactgtgctcgaggcccctctttcttactacggtagttcctactatgttatggactactggggtcaagg	IGHV14-3*01	13	14	92.9	IGHD1-1*01	16	17	94.1	IGHJ4*01	28	29	96.6	60	57	0.95
1	gtgctcgaggcccctcttcttactacggtagttgctactatattatggactactggggtcaagg													0	0
1	gtgctcgaggcccctcttcttactacggtagttactactattttatggactactggggccaagg	IGHV14-3*01	9	9	100									9	9	1
1	gtgctcgaggcccctcttctcactacggtgattcctactatgttatggactactggggtcaagg	IGHV14-3*01	14	17	82.4									17	14	0.823529
1	gtactcgaggcccctcttcttactacggtagttcatactatgttatggactactggggtcaagg	IGHV14-3*01	9	9	100									9	9	1
1	gttctcgaggcccctcttcttactacggtagttcctattatgttatggactactggggccaagg	IGHV14-3*01	9	9	100									9	9	1
1	gtgctcgaggcccctcttctaactacggtgattcctactatgttatggactactggggccaagg	IGHV14-3*01	9	9	100									9	9	1
1	gtgctcgaggcccctcttctgacgacggtgattcctactatgttatggactactggggtcaagg	IGHV14-3*01	9	9	100									9	9	1
1	attactgtgctcgaggcccttcttcttactacggtagttcctattatgttatggactactggggtcaagg	IGHV14-3*01	13	14	92.9									14	13	0.928571
1	gtgctcgagacccctcttcttactacggtagttcctattatgttatggactactggggtcaagg													0	0	#NUM!
1	gtgctcgaggcccctcttcttactacggtagttcctactatattatggactactggcgtcaagg													0	0
1	gtgctcgaggcccctcttcttactacggtagttcctactatgttattgactactgaggtcaagg	IGHV14-3*01	9	9	100									9	9	1
1	gtgttcgagtcccctcttcttactacggtagttcctactatgttatggactactggggccaagg													0	0	#NUM!
1	attactgtgctcgaggccccttttcttactacggtgattcctactatgttatggactactggggtcaagg	IGHV14-3*01	13	14	92.9	IGHD1-1*01	13	14	92.9	IGHJ4*01	28	29	96.6	57	54	0.947368
1	gtgctcgaggcccctcttcttactacggtgattcttactatgttatggactactggggccaagg	IGHV14-3*01	9	9	100									9	9	1
1	gtgttcgaggcccctcttcttactacggtagttcctactatgttattgactactggggccaagg	IGHV14-3*01	9	9	100									9	9	1
1	gtgctcgaggcccctcttcttactacggtaattcctactatgttattgattactggggccaagg	IGHV14-3*01	9	9	100									9	9	1
1	gtgctcgaggcccctcttcttaccacggtgattcctactatgttatggactactggggccaagg	IGHV14-3*01	9	9	100									9	9	1
1	gtgctcgaggcccctcttcttactacgatagttcctactatattattgactactggggccaagg	IGHV14-3*01	9	9	100									9	9	1
1	attactgtgctcgaggaccctcttcttactacggtagttcctactatattatggactactggggtcaagg	IGHV14-3*01	13	14	92.9	IGHD1-1*01	15	16	93.8	IGHJ4*01	27	29	93.1	59	55	0.932203
1	gtgctcgaggcccctcttcttactagggtagttcctactatattatggactactggggtcaagg													0	0
1	gtactcgaggcccctcttcttactgcggtgattcctactatgttatggactactggggtcaagg	IGHV14-3*01	9	9	100									9	9	1
1	actgtgctcgaggcccctcttcttactacggtgattactactatgttatggactactggggccaagg	IGHV14-3*01	9	9	100									9	9	1
1	attactgtgctcgaggcccctcttcttactacggtgattcctactatgttatggactactggggtcaggg	IGHV14-3*01	13	14	92.9	IGHD1-1*01	12	13	92.3	IGHJ4*01	27	29	93.1	56	52	0.928571
1	gttctcgaggcccctcttcttactacggtgattcctactatgttatggactactggggccaagg	IGHV14-3*01	9	9	100									9	9	1
1	attactgtactcgaggctcctcttcttactacggtgattcctactatgttatggactactggggtcaagg													0	0	#NUM!
1	agagctcgaggcccctcttcttactacggtgattcctactatgttatggactactggggtcaagg	IGHV14-3*01	9	9	100									9	9	1
1	gtgctcgaggcccctcttcttactgcggtagttcctactatattatggactactggggtcaaag													0	0
1	gtgctcgacgcccctcttcttactacggtagttcctactatgttattgactactggggtcaagg													0	0	#NUM!
1	cctgtactcgaggcccctcttcttactacggtgattcctactatgttatggactactggggtcaagg	IGHV14-3*01	9	9	100									9	9	1
1	catctattactgcgctcgaggcccctcttcttactacggtagttcctactatattatggactactggggtcaagg	IGHV14-3*01	17	19	89.5	IGHD1-1*01	15	16	93.8	IGHJ4*01	27	29	93.1	64	59	0.921875
1	gtgctcgaggcccctcttcttactacggtagttcatattatgttatggactactggggtcaagg	IGHV14-3*01	9	9	100									9	9	1
1	cttgtgctcgaggcccctcttcttactacggtgattcctactatgttatggactactggggtcaattat	IGHV14-3*01	9	9	100									9	9	1
1	attactgtgctcgaggcccctcttcttactacggtagttccttctatgttatggactactggggtcaagg	IGHV14-3*01	13	14	92.9	IGHD1-1*01	15	16	93.8	IGHJ4*01	26	27	96.3	57	54	0.947368
1	gtgctcgaggcccctcttcttactacggtgatttctactatgttatggactactggggccaagg	IGHV14-3*01	9	9	100									9	9	1
1	gtgctcgaggcccctcttcttactacggtagttcttactatgttgtggactactggggtcaagg	IGHV14-3*01	9	9	100									9	9	1
1	catctattactgtgctcgaggcccctcttcttactacggtagttcctactatattatggactactggggtccaagg	IGHV14-3*01	18	19	94.7	IGHD1-1*01	15	16	93.8	IGHJ4*01	23	25	92	60	56	0.933333
1	gtgctcgaggcccctctttttactacggtgattcctactatgttatggactactggggccaagg	IGHV14-3*01	9	9	100									9	9	1
1	gtgctcgaggcccctcttcttactacggtagttcctattatgttatggactactggggccaaag	IGHV14-3*01	9	9	100									9	9	1
1	attactgtgctcgaggcccctcttcttactacggtagtccctactatgttatggactactggggtcaagg	IGHV14-3*01	13	14	92.9	IGHD1-1*01	15	16	93.8	IGHJ4*01	28	29	96.6	59	56	0.949153
1	gtgctcgaggcccctcttcttactacggtagctcctattatgttatggactactggggtcaagg	IGHV14-3*01	9	9	100									9	9	1
1	gtgctcgaggcccctcttcttactacgttaattcctactatgttatggactactggggtcaagg	IGHV14-3*01	9	9	100									9	9	1
1	gtgctcgaggcccctcttcttactacggtagttcctactttgttcttgactactggggccaagg	IGHV14-3*01	9	9	100									9	9	1
1	gtgctcgaggcccctcttcttactacggtagttcctacgatgttatggactactggggccaagg	IGHV14-3*01	9	9	100									9	9	1
1	gtgctcgaggctcctcttcttgctacggtgattcctactatgttatggactactggggtcaagg													0	0	#NUM!
1	gtgctcgaggcccctcttcttactacggtagttcctactatattatgggctactggggtcaagg													0	0
1	gtgctcgaggctcctcttcttactacggtagttcctactatgttatggactactggggcaaagg													0	0	#NUM!
1	catctattactgtgctcaaggcccctcttcttactacggtagttcctactatattatggactactggggtcaagg	IGHV14-3*01	16	16	100	IGHD1-1*01	15	16	93.8	IGHJ4*01	27	29	93.1	61	58	0.95082
1	gtgctcgaggcctctcttcttactacggtagttcctactatgttatggactactggggtcaagg													0	0	#NUM!
1	gtactcgaggcccctcttcttactatggtagttcctactatgttatggactactggggtcaagg	IGHV14-3*01	9	9	100									9	9	1
1	gtgctcgaggcccctcttcttactactgtagttcctactatgttatggactactggggtcaagg	IGHV14-3*01	9	9	100									9	9	1
1	attactgtgctcgaggcccctcgtcttactacggtagttcctactatattatggactactggggtcaagg	IGHV14-3*01	13	14	92.9	IGHD1-1*01	13	13	100	IGHJ4*01	27	29	93.1	56	53	0.946429
1	gtgctcgaggccccccttcttactacggtagttcctactatgttatggactactggggtcaagg													0	0	#NUM!
1	gtgctcgaggcccctcttcttactactgtgattcctactatgttatggactactggggtcaagg	IGHV14-3*01	9	9	100									9	9	1
1	tgtgctcgaggtccctcttcttactacggtgattcctactatgttatggactactggggccaagg													0	0	#NUM!
1	gtgttcgaggcccctcttcttactacggtagttactactatgttatggactactggggtcaagg	IGHV14-3*01	9	9	100									9	9	1
1	cgtgctcgaggcccctcttcttactacggtagttcctactatgttattgactactggggccaagg	IGHV14-3*01	9	9	100									9	9	1
1	gtgctcgaggcccctcttcttactacggtagttcttattatgttatggactactggggtcaagg	IGHV14-3*01	9	9	100									9	9	1
1	gtgctcaaggcccctcttcttactacgatagttcctactatattatggactactggggtcaagg													0	0	#NUM!
1	tactgtgctcgaggcccctcttcttactacgatagttcctactatattatggactactagggtcaagg	IGHV14-3*01	11	12	91.7	IGHD1-1*01	14	16	87.5	IGHJ4*01	26	29	89.7	57	51	0.894737
1	ttgctcgaggcccctcttcttactacggtagttcctactatgttatgcactactggggtcaagg	IGHV14-3*01	9	9	100									9	9	1
1	gtgctcgaggcccctcttcttactacggtagttcctactacgttatggactactggggtcaagg													0	0
1	gtgctcgaggcccctcttcttactacggtagttcctactatattattgactactgggatcaagg	IGHV14-3*01	9	9	100									9	9	1
1	gtgctcgaggcccctcttcttactacggtagttcctactattttatggactactggggccaagg	IGHV14-3*01	9	9	100									9	9	1
1	gtgctcggggcccctcttcttactacggtagttcctactatgctatggactactggggtcaagg													0	0	#NUM!
1	ttgctcgaggcccctcttcttactacggtagttcttactatattatggactactggggtcaagg													0	0
1	gtactcgaggcccctcttcttactgcggtagttcctactatgttatggactactggggtcaagg	IGHV14-3*01	9	9	100									9	9	1
1	gtgctcgaggcccctcttcttactacggtagttcctactatgttatgaactactggggtcaagg	IGHV14-3*01	9	9	100									9	9	1
1	gtgctcgaggccccccttcttactacggtagttcctactatattatggactactggggccaagg													0	0	#NUM!
1	gtactcgaggcccctcttcttactatggtgattcctactatgttatggactactggggtcaagg	IGHV14-3*01	9	9	100									9	9	1
1	gtgctcgaggcccctcttcttactatggtagttcctactatgttattgactactggggccaagg	IGHV14-3*01	9	9	100									9	9	1

## Sheet: MBC_10
Subclone size (number of UMIs)	Sequence	V allele	V match (bp)	V length (bp)	V identity (% of germline)	D allele	D match (bp)	D length (bp)	D identity (% of germline)	J allele	J match (bp)	J length (bp)	J identity (% of germline)	Total length (bp)	Total match (bp)	Total identity (% of germline)
24249	actctgccgtctattattgtacaagggtctattatggtagttcctggtttgcttactggggccaagggcgcgatagg	IGHV1-15*01	24	25	96	IGHD2-1*01	11	12	91.7	IGHJ3*01	26	26	100	63	61	0.968254

[truncated: 23 more sheets: MBC_11, MBC_12, MBC_13, MBC_14, MBC_15, MBC_19, PPMBC_1, PPMBC_2, PPMBC_3, PPMBC_4, PPMBC_5, PPMBC_6, PPMBC_8, PPMBC_12, PPMBC_14, PPMBC_19, PPMBC_20, SMBC_1, SMBC_3, SMBC_4 …]
