# Supplementary material for: Distinct Genetically Determined Origins of Myd88 / BCL2 -Driven Aggressive Lymphoma Rationalize Targeted Therapeutic Intervention Strategies
Source: Oxford University Press journal article supplement (doi:10.1158/2643-3230.bcd-22-0007), 2022-11-07
Supplement: bcd-22-0007_table_s4_suppst4.xlsx [file bcd-22-0007_table_s4_suppst4.xlsx]

## Sheet: mm10_complete
Animal_ID	Genotype	Target_Name	Gene_Hugo	Chromosome	Start	End	Strand	Transcript	CCDS_ID	Wild_Type	Mutant	In_dbSNP	Type_1	Type_2	Change_cDNA	Change_Protein	Prot_Start	Prot_End	Allelic_Fraction_Tumor	Allelic_Fraction_Normal	Coverage_Tumor	Coverage_Normal	Mutation_Score	FR_Score
BWQ-100	PPMBC	entg|C8g,ref|NM_027062	C8g	chr2	25498928	25498928	-	NM_027062	NM_027062	G	A	0	missense	SNM	c.572C>T	p.A191V	191	191	0.0547945	0	292	408	1	0.6
BWQ-100	PPMBC	ref|NM_001083919,entg|Xirp2,ref|NM_001024618,entg|Xirp2	Xirp2	chr2	67515478	67515478	+	NM_001024618	NM_001024618	T	C	0	silent	SNM	c.8062T>C	p.L2688L	2688	2688	0.0803571	0	112	254	1	0.5
BWQ-100	PPMBC	entg|Clec2d,ref|NM_053109	Clec2d	chr6	129183142	129183142	+	NM_053109	NM_053109	G	A	0	missense	SNM	c.118G>A	p.A40T	40	40	0.08	0	175	359	1	0.555556
BWQ-100	PPMBC	entg|Cd22,ref|NM_009845,entg|Cd22,ref|NM_001043317	Cd22	chr7	30877595	30877596	-	NM_001043317	NM_001043317	GG	AA	0	missense	DNM	c.285_286delinsTT	p.L96F	96	96	0.0626965	0	311	366	1	0.583333
BWQ-100	PPMBC	ref|NM_146503,entg|Olfr952	Olfr952	chr9	39426766	39426766	-	NM_146503	NM_146503	A	C	0	missense	SNM	c.304T>G	p.Y102D	102	102	0.0658436	0	243	388	1	0.454545
BWQ-100	PPMBC	entg|Itsn2,entg|Itsn2,ref|NM_001198968,ref|NM_011365	Itsn2	chr12	4706334	4706334	+	NM_001198968	NM_001198968	T	G	0	silent	SNM	c.4029T>G	p.T1343T	1343	1343	0.0625	0	224	189	1	0.555556
BWQ-100	PPMBC	entg|Hist1h2be,ref|NM_001177653,entg|Hist1h2be,ref|NM_178194	Hist1h2be	chr13	23585638	23585638	-	NM_001177653	NM_001177653	G	A	0	silent	SNM	c.319C>T	p.L107L	107	107	0.0474308	0	759	320	1	0.5
BWQ-100	PPMBC	ref|NR_003645,entg|Ube2dnl	Ube2dnl1	chrX	114905670	114905670	+	NM_001276396	NM_001276396	A	G	0	missense	SNM	c.241A>G	p.I81V	81	81	0.0550725	0	345	707	1	0.461538
BWQ-104	PPMBC	ref|NM_133780,entg|Tpr	Tpr	chr1	150443365	150443365	+	NM_133780	NM_133780	A	G	0	missense	SNM	c.6601A>G	p.T2201A	2201	2201	0.212209	0	344	491	1	0.431373
BWQ-104	PPMBC	entg|Cdh4,ref|NM_009867	Cdh4	chr2	179780366	179780366	+	NM_009867	NM_009867	C	T	0	silent	SNM	c.282C>T	p.P94P	94	94	0.6	0	90	135	1	0.6875
BWQ-104	PPMBC	entg|Mup5,ref|NM_008649	Mup5	chr4	61834614	61834614	-	NM_008649	NM_008649	T	C	0	silent	SNM	c.171A>G	p.R57R	57	57	0.104603	0	239	1048	1	0.785714
BWQ-104	PPMBC	entg|Ints1,ref|NM_026748	Ints1	chr5	139771709	139771709	-	NM_026748	NM_026748	G	T	0	missense	SNM	c.1052C>A	p.T351K	351	351	0.0769231	0	130	83	1	1
BWQ-104	PPMBC	ref|NM_001029877,entg|Nova2	Nova2	chr7	18957683	18957683	+	NM_001029877	NM_001029877	G	C	0	missense	SNM	c.544G>C	p.V182L	182	182	0.297521	0	121	107	1	0.125
BWQ-104	PPMBC	entg|Mesdc1,ref|NM_030705	Mesdc1	chr7	83882303	83882303	-	NM_030705	NM_030705	T	C	0	missense	SNM	c.919A>G	p.R307G	307	307	0.290323	0	93	66	1	0.5
BWQ-104	PPMBC	entg|Elavl1,ref|NM_010485	Elavl1	chr8	4301774	4301774	-	NM_010485	NM_010485	G	A	0	missense	SNM	c.341C>T	p.P114L	114	114	0.233333	0	60	93	1	0.272727
BWQ-104	PPMBC	entg|Col6a5,ref|NM_001167923	Col6a5	chr9	105928159	105928159	-	NM_001167923	NM_001167923	G	T	0	missense	SNM	c.3547C>A	p.L1183M	1183	1183	0.236641	0	131	212	1	0.47619
BWQ-104	PPMBC	entg|Arvcf,ref|NM_033474	Arvcf	chr16	18402668	18402668	+	NM_033474	NM_033474	G	A	0	missense	SNM	c.2024G>A	p.S675N	675	675	0.163636	0	55	40	1	0.5
BWQ-104	PPMBC	entg|Fbxo40,ref|NM_001037321	Fbxo40	chr16	36970557	36970557	-	NM_001037321	NM_001037321	G	A	0	missense	SNM	c.190C>T	p.P64S	64	64	0.2	0	130	64	1	0.733333
BWQ-58	PPMBC	ref|NM_001011874,entg|Xkr4	Xkr4	chr1	3216743	3216743	-	NM_001011874	NM_001011874	A	C	0	missense	SNM	c.1223T>G	p.I408S	408	408	0.147959	0	196	280	1	0.8125
BWQ-58	PPMBC	ref|NM_009355,entg|Prss39	Prss39	chr1	34502039	34502039	+	NM_009355	NM_009355	C	T	0	missense	SNM	c.623C>T	p.A208V	208	208	0.135922	0	206	294	1	0.647059
BWQ-58	PPMBC	ref|NM_009183,entg|St8sia4,ref|NM_001159745,entg|St8sia4	St8sia4	chr1	95667179	95667179	-	NM_009183	NM_009183	G	A	0	missense	SNM	c.83C>T	p.T28I	28	28	0.123153	0	203	314	1	0.923077
BWQ-58	PPMBC	entg|Bcl2,ref|NM_009741,entg|Bcl2,ref|NM_177410	Bcl2	chr1	106712857	106712857	-	NM_009741	NM_009741	C	T	0	silent	SNM	c.24G>A	p.G8G	8	8	0.100719	0	139	223	1	0.75
BWQ-58	PPMBC	ref|NM_001195816,entg|Pld5,ref|NM_176916,entg|Pld5	Pld5	chr1	175975498	175975498	-	NM_176916	NM_176916	T	G	0	missense	SNM	c.1200A>C	p.K400N	400	400	0.128755	0	233	235	1	1
BWQ-58	PPMBC	ref|NM_009776,entg|Serping1	Serping1	chr2	84773557	84773557	-	NM_009776	NM_009776	C	T	0	missense	SNM	c.139G>A	p.E47K	47	47	0.0625	0	320	178	1	0.538462
BWQ-58	PPMBC	ref|NM_148933,entg|Slco4a1	Slco4a1	chr2	180471201	180471201	+	NM_148933	NM_148933	C	A	0	missense	SNM	c.1225C>A	p.P409T	409	409	0.140097	0.00290698	207	344	1	0.933333
BWQ-58	PPMBC	ref|NM_130448,entg|Pcdh18	Pcdh18	chr3	49753389	49753389	-	NM_130448	NM_130448	C	T	0	missense	SNM	c.2632G>A	p.E878K	878	878	0.0705882	0	170	222	1	1
BWQ-58	PPMBC	ref|NM_009174,entg|Siah2	Siah2	chr3	58691471	58691471	-	NM_009174	NM_009174	G	A	0	silent	SNM	c.345C>T	p.C115C	115	115	0.150442	0	226	138	1	0.545455
BWQ-58	PPMBC	ref|NM_207272,entg|Tdpoz4	Tdpoz4	chr3	93796565	93796565	+	NM_207272	NM_207272	T	C	0	silent	SNM	c.168T>C	p.C56C	56	56	0.110092	0	218	205	1	0.411765
BWQ-58	PPMBC	entg|Hist2h2ac,ref|NM_175662	Hist2h2ac	chr3	96220590	96220590	-	NM_175662	NM_175662	C	T	0	silent	SNM	c.255G>A	p.Q85Q	85	85	0.0825243	0	1030	891	1	0.666667
BWQ-58	PPMBC	ens|ENSMUST00000090779,gb|BC080809,gb|BC094041	Hist2h3c1	chr3	96247274	96247274	+	NM_178216	NM_178216	G	A	0	missense	SNM	c.389G>A	p.R130H	130	130	0.239865	0	296	162	1	0.0757576
BWQ-58	PPMBC	entg|AI747448,ref|NM_001033199	Clca4b	chr3	144919266	144919266	-	NM_001033199	NM_001033199	T	A	0	missense	SNM	c.1463A>T	p.K488M	488	488	0.0689655	0	377	478	1	1
BWQ-58	PPMBC	entg|Gem,ref|NM_010276	Gem	chr4	11713517	11713517	+	NM_010276	NM_010276	G	T	0	nonsense	SNM	c.652G>T	p.E218*	218	218	0.0723404	0	235	212	1	0.888889
BWQ-58	PPMBC	ref|NM_025919,entg|Rpl11	Rpl11	chr4	136052618	136052618	-	NM_025919	NM_025919	C	T	0	missense	SNM	c.106G>A	p.A36T	36	36	0.128806	0	427	329	1	0.774194
BWQ-58	PPMBC	entg|Hyal5,ref|NM_028957	Hyal5	chr6	24876580	24876580	+	NM_028957	NM_028957	C	T	0	missense	SNM	c.451C>T	p.P151S	151	151	0.101523	0	197	244	1	1
BWQ-58	PPMBC	ref|NM_009525,entg|Wnt5b,entg|Fbxl14,ref|NM_133940	Fbxl14	chr6	119480186	119480186	+	NM_133940	NM_133940	C	G	0	silent	SNM	c.327C>G	p.G109G	109	109	0.0825688	0	109	87	1	0.8
BWQ-58	PPMBC	entg|Chd4,ref|NM_145979	Chd4	chr6	125109443	125109443	+	NM_145979	NM_145979	G	A	0	missense	SNM	c.2905G>A	p.V969M	969	969	0.0617284	0.00574713	162	174	1	1
BWQ-58	PPMBC	ref|NM_001037168,entg|Psg27	Psg27	chr7	18561943	18561943	-	NM_001037168	NM_001037168	C	A	0	missense	SNM	c.576G>T	p.M192I	192	192	0.121457	0	494	611	1	0.5
BWQ-58	PPMBC	ref|NM_001163554,ref|NM_001163555,ref|NM_001163556,ref|NM_011138,entg|Pou2f2,entg|Pou2f2,entg|Pou2f2,entg|Pou2f2	Pou2f2	chr7	25121204	25121204	-	NM_001163554	NM_001163554	G	A	0	missense	SNM	c.46C>T	p.P16S	16	16	0.066879	0	314	399	1	0.4
BWQ-58	PPMBC	ref|NM_001163554,ref|NM_001163555,ref|NM_001163556,ref|NM_011138,entg|Pou2f2,entg|Pou2f2,entg|Pou2f2,entg|Pou2f2	Pou2f2	chr7	25132422	25132422	-	NM_001163554	NM_001163554	T	C	0	splice	SNM	c.28_splice	e2+3	9	9	0.0737705	0	244	248	1	0.5
BWQ-58	PPMBC	ref|NM_023258,entg|Pycard	Pycard	chr7	127993648	127993648	-	NM_023258	NM_023258	C	T	0	silent	SNM	c.6G>A	p.G2G	2	2	0.125	0.0042735	280	234	1	0.590909
BWQ-58	PPMBC	entg|Cpxm2,ref|NM_018867	Cpxm2	chr7	132154310	132154310	-	NM_018867	NM_018867	A	C	0	missense	SNM	c.304T>G	p.L102V	102	102	0.102941	0	68	122	1	0.75
BWQ-58	PPMBC	entg|Irf2bp2,ref|NM_001164598	Irf2bp2	chr8	126593252	126593252	-	NM_001164598	NM_001164598	G	C	0	missense	SNM	c.185C>G	p.A62G	62	62	0.0808081	0	99	77	1	1
BWQ-58	PPMBC	entg|Glb1l3,ref|NM_001113323	Glb1l3	chr9	26860561	26860561	-	NM_001113323	NM_001113323	C	T	0	splice	SNM	c.14_splice	e2+1	4	4	0.125	0	264	148	1	0.736842
BWQ-58	PPMBC	entg|Fam46a,ref|NM_001160378,entg|Fam46a,ref|NM_001160379	Fam46a	chr9	85326997	85326997	-	NM_001160378	NM_001160378	C	A	0	missense	SNM	c.11G>T	p.R4I	4	4	0.141791	0	134	167	1	0.727273
BWQ-58	PPMBC	ref|NM_172788,entg|Sh3rf3	Sh3rf3	chr10	58984135	58984135	+	NM_172788	NM_172788	C	A	0	missense	SNM	c.767C>A	p.A256E	256	256	0.165165	0	333	209	1	0.774194
BWQ-58	PPMBC	entg|Lmnb2,ref|NM_010722	Lmnb2	chr10	80918080	80918080	-	NM_010722	NM_010722	G	A	0	missense	SNM	c.82C>T	p.L28F	28	28	0.109589	0	73	151	1	1
BWQ-58	PPMBC	entg|Ano4,ref|NM_178773	Ano4	chr10	89035073	89035073	-	NM_001277188	NM_001277188	A	T	0	splice	SNM	c.841_splice	e9+2	280	280	0.0875	0	80	283	1	0.4
BWQ-58	PPMBC	ref|NM_146677,entg|Olfr825	Olfr825	chr10	130163226	130163226	-	NM_146677	NM_146677	G	T	0	silent	SNM	c.99C>A	p.L33L	33	33	0.125	0	248	250	1	0.722222
BWQ-58	PPMBC	entg|Hist1h1d,ref|NM_145713	Hist1h1d	chr13	23555305	23555305	+	NM_145713	NM_145713	C	T	0	silent	SNM	c.216C>T	p.Y72Y	72	72	0.135593	0	236	204	1	0.882353
BWQ-58	PPMBC	entg|Hist1h1d,ref|NM_145713	Hist1h1d	chr13	23555460	23555460	+	NM_145713	NM_145713	C	T	0	missense	SNM	c.371C>T	p.A124V	124	124	0.187817	0.00558659	197	179	1	0.48
BWQ-58	PPMBC	entg|Hist1h2bb,ref|NM_175664	Hist1h2bb	chr13	23747094	23747094	+	NM_175664	NM_175664	C	T	0	silent	SNM	c.300C>T	p.R100R	100	100	0.10468	0	812	331	1	0.440678
BWQ-58	PPMBC	ref|NM_001040692,ref|NM_001136087,ref|NM_001168643,ref|NM_001168644,ref|NM_001168645,ref|NM_001168646,entg|Slc6a18,entg|Slc6a18,entg|Slc6a18,entg|Slc6a18,entg|Slc6a18,entg|Slc6a18	Slc6a18	chr13	73669955	73669955	-	NM_001040692	NM_001040692	T	C	0	silent	SNM	c.942A>G	p.A314A	314	314	0.0524781	0	343	244	1	1
BWQ-58	PPMBC	entg|Dnahc5,ref|NM_133365	Dnah5	chr15	28289058	28289058	+	NM_133365	NM_133365	T	G	0	missense	SNM	c.3392T>G	p.V1131G	1131	1131	0.112903	0	124	190	1	0.4
BWQ-58	PPMBC	ref|NM_009375,entg|Tg,ref|NM_009192,entg|Sla,ref|NM_001029841,entg|Sla	Sla	chr15	66793697	66793697	-	NM_001029841	NM_001029841	G	T	0	missense	SNM	c.193C>A	p.L65M	65	65	0.0709534	0	451	388	1	0.6
BWQ-58	PPMBC	ref|NM_001033367,entg|Nlrc4	Nlrc4	chr17	74446880	74446880	-	NM_001033367	NM_001033367	G	A	0	silent	SNM	c.507C>T	p.G169G	169	169	0.145098	0	255	192	1	0.608696
BWQ-58	PPMBC	entg|1700106N22Rik,ref|NM_028576	Camkmt	chr17	85394602	85394602	+	NM_028576	NM_028576	G	A	0	missense	SNM	c.493G>A	p.V165I	165	165	0.17037	0	135	147	1	0.769231
BWQ-58	PPMBC	ref|NM_028627,entg|Psd	Psd	chr19	46322159	46322159	-	NM_028627	NM_028627	C	T	0	missense	SNM	c.1450G>A	p.V484M	484	484	0.108974	0	156	111	1	0.545455
BWQ-58	PPMBC	ref|NM_001142918,ref|NM_001142919,ref|NM_001142920,ref|NM_001142921,ref|NM_001142922,ref|NM_001142923,ref|NM_009333,entg|Tcf7l2,entg|Tcf7l2,entg|Tcf7l2,entg|Tcf7l2,entg|Tcf7l2,entg|Tcf7l2,entg|Tcf7l2,ref|NM_001142924,entg|Tcf7l2	Tcf7l2	chr19	55908456	55908456	+	NM_001142922	NM_001142922	C	A	0	missense	SNM	c.517C>A	p.H173N	173	173	0.062069	0	145	189	1	0.5
BWQ-58	PPMBC	entg|Mid1ip1,entg|Mid1ip1,ref|NM_001166635,ref|NM_026524	Mid1ip1	chrX	10718653	10718653	+	NM_026524	NM_026524	C	T	0	silent	SNM	c.424C>T	p.L142L	142	142	0.142857	0	98	231	1	0.555556
BWQ-58	PPMBC	ref|NM_133669,entg|Rp2h	Rp2h	chrX	20364810	20364810	+	NM_133669	NM_133669	C	T	0	silent	SNM	c.75C>T	p.S25S	25	25	0.116883	0	77	134	1	0.5
BWQ-58	PPMBC	entg|Dhx37,ref|NM_203319	Dhx37	chr5	125419306	125419306	-	NM_203319	NM_203319	----	ACGG	0	frame_shift_ins	INS	c.2171_2172insCCGT	p.V724fs	724	724	0.0645161	0	155	174	1	0.428571
BWQ-61	PPMBC	entg|Col4a3,ref|NM_007734	Col4a3	chr1	82673986	82673986	+	NM_007734	NM_007734	G	A	0	missense	SNM	c.1763G>A	p.S588N	588	588	0.0960452	0	177	77	1	0.7
BWQ-61	PPMBC	ref|NM_146970,entg|Olfr1239	Olfr1239	chr2	89417626	89417626	-	NM_146970	NM_146970	A	C	0	silent	SNM	c.786T>G	p.T262T	262	262	0.0986842	0	152	260	1	0.5
BWQ-61	PPMBC	entg|Mcl1,ref|NM_008562	Mcl1	chr3	95660010	95660010	+	NM_008562	NM_008562	T	G	0	splice	SNM	c.879_splice	e2+2	293	293	0.0651163	0	215	352	1	0.4
BWQ-61	PPMBC	ref|NM_021053,entg|Slc46a2	Slc46a2	chr4	59914532	59914532	-	NM_021053	NM_021053	C	T	0	missense	SNM	c.390G>A	p.M130I	130	130	0.115242	0	269	142	1	0.55
BWQ-61	PPMBC	entg|Fscn1,ref|NM_007984	Fscn1	chr5	142960898	142960898	+	NM_007984	NM_007984	G	A	0	silent	SNM	c.450G>A	p.K150K	150	150	0.102273	0	352	152	1	0.565217
BWQ-61	PPMBC	entg|Fscn1,ref|NM_007984	Fscn1	chr5	142960900	142960900	+	NM_007984	NM_007984	G	A	0	missense	SNM	c.452G>A	p.R151H	151	151	0.0976331	0	338	148	1	0.736842
BWQ-61	PPMBC	ref|NM_001171024,entg|Nup62-il4i1,entg|Il4i1,ref|NM_010215	Nup62-il4i1	chr7	44836716	44836716	+	NM_001171024	NM_001171024	G	A	0	silent	SNM	c.123G>A	p.E41E	41	41	0.100457	0	219	206	1	0.571429
BWQ-61	PPMBC	entg|4632434I11Rik,ref|NM_001080995	Ddias	chr7	92859912	92859912	-	NM_001080995	NM_001080995	G	A	0	missense	SNM	c.794C>T	p.T265I	265	265	0.0812721	0	283	233	1	0.642857
BWQ-61	PPMBC	ref|NM_146726,entg|Olfr514	Olfr514	chr7	108825315	108825315	-	NM_146726	NM_146726	G	A	0	missense	SNM	c.683C>T	p.P228L	228	228	0.0857143	0	350	458	1	0.5
BWQ-61	PPMBC	entg|Bet1l,ref|NM_018742	Bet1l	chr7	140854464	140854464	-	NM_018742	NM_018742	T	G	0	silent	SNM	c.328A>C	p.R110R	110	110	0.105991	0	217	151	1	0.533333
BWQ-61	PPMBC	entg|Irf2bp2,ref|NM_001164598	Irf2bp2	chr8	126592945	126592945	-	NM_001164598	NM_001164598	C	T	0	silent	SNM	c.492G>A	p.E164E	164	164	0.0784314	0	255	127	1	0.666667
BWQ-61	PPMBC	ref|NM_147108,entg|Olfr979	Olfr979	chr9	40000977	40000977	-	NM_147108	NM_147108	C	A	0	missense	SNM	c.249G>T	p.L83F	83	83	0.0706522	0	736	311	1	0.625
BWQ-61	PPMBC	ref|NM_010907,entg|Nfkbia	Nfkbia	chr12	55492398	55492398	-	NM_010907	NM_010907	C	T	0	silent	SNM	c.129G>A	p.E43E	43	43	0.0869565	0	69	122	1	1
BWQ-61	PPMBC	entg|Hist1h3a,ref|NM_013550	Hist1h3a	chr13	23762158	23762158	-	NM_013550	NM_013550	G	A	0	silent	SNM	c.196C>T	p.L66L	66	66	0.0949721	0	716	237	1	0.837838
BWQ-61	PPMBC	entg|Cd83,ref|NM_009856	Cd83	chr13	43785441	43785441	+	NM_009856	NM_009856	C	T	0	missense	SNM	c.133C>T	p.L45F	45	45	0.0740741	0	106	137	1	1
BWQ-61	PPMBC	entg|Auh,ref|NM_016709	Auh	chr13	52919240	52919240	-	NM_016709	NM_016709	C	A	0	missense	SNM	c.214G>T	p.A72S	72	72	0.0588235	0	289	345	1	0.416667
BWQ-61	PPMBC	ref|NM_001163638,ref|NM_001163639,ref|NM_029698,entg|Ttc18,entg|Ttc18,entg|Ttc18	Cfap70	chr14	20416568	20416568	-	NM_029698	NM_029698	C	G	0	missense	SNM	c.1780G>C	p.E594Q	594	594	0.0804598	0	174	260	1	0.555556
BWQ-61	PPMBC	ref|NM_172809,entg|Sacs	Sacs	chr14	61191594	61191594	+	NM_172809	NM_172809	T	C	0	silent	SNM	c.1101T>C	p.S367S	367	367	0.0995475	0	221	185	1	0.692308
BWQ-61	PPMBC	ref|NM_175499,entg|Slitrk6	Slitrk6	chr14	110751583	110751583	-	NM_175499	NM_175499	T	C	0	missense	SNM	c.691A>G	p.N231D	231	231	0.0769231	0	247	175	1	0.461538
BWQ-61	PPMBC	entg|Ly6e,entg|Ly6e,entg|Ly6e,ref|NM_001164037,ref|NM_001164038,ref|NM_001164039,entg|Ly6e,entg|Ly6e,ref|NM_001164036,ref|NM_008529,entg|Ly6e,ref|NM_001164040	Ly6e	chr15	74958593	74958593	+	NM_008529	NM_008529	C	A	0	nonsense	SNM	c.291C>A	p.Y97*	97	97	0.0782123	0	179	194	1	0.4
BWQ-61	PPMBC	entg|Dnm1l,entg|Dnm1l,ref|NM_001025947,ref|NM_152816	Dnm1l	chr16	16358761	16358761	-	NM_001276340	NM_001276340	T	A	0	splice	SNM	c.102_splice	e2+3	34	34	0.13449	0	461	437	1	0.771429
BWQ-61	PPMBC	ref|NM_008842,entg|Pim1	Pim1	chr17	29491215	29491215	+	NM_008842	NM_008842	G	C	0	missense	SNM	c.72G>C	p.K24N	24	24	0.0842105	0	95	115	1	0.6
BWQ-61	PPMBC	ref|NM_008842,entg|Pim1	Pim1	chr17	29491359	29491359	+	NM_008842	NM_008842	G	A	0	silent	SNM	c.117G>A	p.Q39Q	39	39	0.113043	0	230	212	1	0.733333
BWQ-61	PPMBC	entg|H2-Ab1,ref|NM_207105	H2-Ab1	chr17	34264835	34264835	+	NM_207105	NM_207105	T	C	0	missense	SNM	c.169T>C	p.Y57H	57	57	0.111554	0	241	133	1	0.4
BWQ-61	PPMBC	ref|NM_001081072,entg|Slc27a6	Slc27a6	chr18	58582192	58582192	+	NM_001081072	NM_001081072	A	G	0	missense	SNM	c.866A>G	p.K289R	289	289	0.0853242	0	293	248	1	0.923077
BWQ-61	PPMBC	ref|NM_008690,entg|Nfkbie	Nfkbie	chr17	45560430	45560430	+	NM_001304956	NM_001304956	-	T	0	frame_shift_ins	INS	c.811_812insT	p.A271fs	271	271	0.0753425	0	146	98	1	0.571429
BWQ-63	PPMBC	entg|Dusp27,entg|Dusp27,ref|NM_001033344,ref|NM_001160049	Dusp27	chr1	166099473	166099473	-	NM_001160049	NM_001160049	C	T	0	missense	SNM	c.2569G>A	p.D857N	857	857	0.0569106	0	246	249	1	1
BWQ-63	PPMBC	ref|NM_146844,entg|Olfr1107	Olfr1107	chr2	87071634	87071634	-	NM_146844	NM_146844	C	T	0	missense	SNM	c.499G>A	p.D167N	167	167	0.117647	0	204	305	1	0.411765
BWQ-63	PPMBC	entg|Mcl1,ref|NM_008562	Mcl1	chr3	95658895	95658895	+	NM_008562	NM_008562	C	A	0	missense	SNM	c.39C>A	p.N13K	13	13	0.258621	0	58	78	1	0.25
BWQ-63	PPMBC	entg|Hsd3b5,ref|NM_008295	Hsd3b5	chr3	98619567	98619567	-	NM_008295	NM_008295	G	T	0	missense	SNM	c.562C>A	p.P188T	188	188	0.176737	0	661	642	1	0.918033
BWQ-63	PPMBC	entg|Gpr3,ref|NM_008154	Gpr3	chr4	133211191	133211191	-	NM_008154	NM_008154	C	T	0	missense	SNM	c.169G>A	p.E57K	57	57	0.133641	0	217	150	1	0.705882
BWQ-63	PPMBC	ref|NM_178804,entg|Slit2	Slit2	chr5	48256800	48256800	+	NM_001291227	NM_001291227	A	C	0	missense	SNM	c.2781A>C	p.L927F	927	927	0.162896	0	221	216	1	0.714286
BWQ-63	PPMBC	ref|NM_172882,entg|Wdfy3	Wdfy3	chr5	101851277	101851277	-	NM_172882	NM_172882	G	A	0	missense	SNM	c.9272C>T	p.T3091I	3091	3091	0.119565	0	92	195	1	0.833333
BWQ-63	PPMBC	entg|Brca2,ref|NM_009765,entg|Brca2,ref|NM_001081001	Brca2	chr5	150556993	150556993	+	NM_001081001	NM_001081001	G	A	0	missense	SNM	c.8227G>A	p.V2743I	2743	2743	0.135747	0	442	427	1	0.714286
BWQ-63	PPMBC	ref|NM_008881,entg|Plxna1	Plxna1	chr6	89357350	89357350	-	NM_008881	NM_008881	A	G	0	missense	SNM	c.296T>C	p.V99A	99	99	0.0626506	0	415	291	1	0.625
BWQ-63	PPMBC	entg|Mtmr14,ref|NM_026849	Mtmr14	chr6	113238055	113238055	+	NM_026849	NM_026849	G	A	0	silent	SNM	c.90G>A	p.E30E	30	30	0.137255	0	51	48	1	0.75
BWQ-63	PPMBC	ref|NM_007531,entg|Phb2	Phb2	chr6	124712711	124712711	+	NM_007531	NM_007531	C	A	0	silent	SNM	c.135C>A	p.G45G	45	45	0.235294	0	67	94	1	0.6
BWQ-63	PPMBC	ref|NM_001105067,entg|Vmn2r35	Vmn2r35	chr7	7817070	7817070	-	NM_001105067	NM_001105067	T	G	0	missense	SNM	c.200A>C	p.K67T	67	67	0.253968	0	63	159	1	0.0666667
BWQ-63	PPMBC	entg|Kif22,ref|NM_145588	Kif22	chr7	127028211	127028211	-	NM_145588	NM_145588	C	T	0	silent	SNM	c.1734G>A	p.E578E	578	578	0.182266	0	203	235	1	0.947368
BWQ-63	PPMBC	entg|Ankrd10,entg|Ankrd10,entg|Ankrd10,ref|NM_133971,ref|NR_030779,ref|NR_030780,entg|Ankrd10,ref|NM_001167967	Ankrd10	chr8	11635557	11635557	-	NM_133971	NM_133971	G	A	0	missense	SNM	c.61C>T	p.L21F	21	21	0.15942	0	69	57	1	0.833333
BWQ-63	PPMBC	entg|Ces1g,ref|NM_021456	Ces1g	chr8	93317015	93317015	-	NM_021456	NM_021456	G	A	0	missense	SNM	c.1295C>T	p.S432F	432	432	0.0670732	0	164	226	1	0.571429
BWQ-63	PPMBC	entg|Irf2bp2,ref|NM_001164598	Irf2bp2	chr8	126591816	126591816	-	NM_001164598	NM_001164598	G	A	0	missense	SNM	c.1010C>T	p.A337V	337	337	0.201087	0	184	103	1	0.233333
BWQ-63	PPMBC	entg|Irf2bp2,ref|NM_001164598	Irf2bp2	chr8	126592750	126592750	-	NM_001164598	NM_001164598	G	A	0	silent	SNM	c.687C>T	p.S229S	229	229	0.215686	0	51	31	1	0.222222
BWQ-63	PPMBC	ref|NM_146279,entg|Olfr960	Olfr960	chr9	39623649	39623649	+	NM_146279	NM_146279	T	G	0	missense	SNM	c.525T>G	p.S175R	175	175	0.0909091	0	605	213	1	0.447368
BWQ-63	PPMBC	entg|Mll1,ref|NM_001081049	Kmt2a	chr9	44826871	44826871	-	NM_001081049	NM_001081049	T	G	0	missense	SNM	c.5741A>C	p.D1914A	1914	1914	0.32872	0	289	315	1	0.862745
BWQ-63	PPMBC	ref|NM_026701,entg|Pbld1	Pbld1	chr10	63065818	63065818	+	NM_026701	NM_026701	G	A	0	missense	SNM	c.119G>A	p.R40K	40	40	0.14	0	200	327	1	0.4
BWQ-63	PPMBC	ref|NM_206822,entg|Olfr10	Olfr10	chr11	49317691	49317691	+	NM_206822	NM_206822	C	T	0	silent	SNM	c.144C>T	p.L48L	48	48	0.151383	0	687	914	1	0.650794
BWQ-63	PPMBC	ref|NM_010907,entg|Nfkbia	Nfkbia	chr12	55492320	55492320	-	NM_010907	NM_010907	C	T	0	silent	SNM	c.207G>A	p.Q69Q	69	69	0.142857	0	42	61	1	0.5
BWQ-63	PPMBC	entg|Dapk1,ref|NM_029653,entg|Dapk1,ref|NM_134062	Dapk1	chr13	60740095	60740095	+	NM_001285917	NM_001285917	A	G	0	missense	SNM	c.1964A>G	p.H655R	655	655	0.102778	0	360	217	1	0.681818
BWQ-63	PPMBC	entg|Apobec3,entg|Apobec3,ref|NM_001160415,ref|NM_030255	Apobec3	chr15	79895462	79895462	+	NM_001160415	NM_001160415	T	A	0	nonsense	SNM	c.105T>A	p.Y35*	35	35	0.24375	0	160	183	1	0.147059
BWQ-63	PPMBC	ref|NM_026817,entg|Rabl2	Rabl2	chr15	89583933	89583933	-	NM_026817	NM_026817	C	T	0	missense	SNM	c.484G>A	p.A162T	162	162	0.181818	0	209	238	1	0.583333
BWQ-63	PPMBC	entg|Ccdc116,ref|NM_001164606,entg|Ccdc116,ref|NM_029779	Ccdc116	chr16	17142441	17142441	-	NM_029779	NM_029779	T	C	0	missense	SNM	c.511A>G	p.S171G	171	171	0.209738	0	267	273	1	0.647059
BWQ-63	PPMBC	ref|NM_172455,entg|Tmprss7	Tmprss7	chr16	45663282	45663282	-	NM_172455	NM_172455	G	A	0	silent	SNM	c.1728C>T	p.D576D	576	576	0.208122	0	197	226	1	0.64
BWQ-63	PPMBC	ref|NM_183021,entg|Thada	Thada	chr17	84435585	84435585	-	NM_183021	NM_183021	G	A	0	silent	SNM	c.2410C>T	p.L804L	804	804	0.171975	0	157	196	1	0.6875
BWQ-63	PPMBC	ref|NM_011635,entg|Trap1a	Trap1a	chrX	139336826	139336826	+	NM_011635	NM_011635	T	C	0	silent	SNM	c.459T>C	p.V153V	153	153	0.255319	0	94	276	1	1
BWQ-63	PPMBC	entg|Cdkl5,ref|NM_001024624,entg|Gja6,ref|NM_001001496	Gja6	chrX	160903497	160903497	-	NM_001001496	NM_001001496	T	C	0	silent	SNM	c.438A>G	p.K146K	146	146	0.425926	0	108	227	1	0.84
BWQ-63	PPMBC	entg|Bhlhe41,ref|NM_024469	Bhlhe41	chr6	145863020	145863026	-	NM_024469	NM_024469	GGGTGGC	-------	0	frame_shift_del	DEL	c.1059_1065delGCCACCC	p.S353fs	353	353	0.271028	0	107	148	1	0.8125
BWQ-63	PPMBC	entg|AW551984,ref|NM_001199556,entg|AW551984,ref|NM_178737	AW551984	chr9	39597082	39597082	-	NM_178737	NM_178737	T	-	0	frame_shift_del	DEL	c.1137delA	p.K379fs	379	379	0.135294	0	170	167	1	0.916667
BWQ-67	PPMBC	ref|NM_001170742,ref|NM_001170743,ref|NM_176923,entg|Wdr59,entg|Wdr59,entg|Wdr59	Wdr59	chr8	111451053	111451053	-	NM_001170743	NM_001170743	G	A	0	missense	SNM	c.2773C>T	p.R925W	925	925	0.0789474	0	190	165	1	0.666667
BWQ-67	PPMBC	entg|Islr,ref|NM_001195431,entg|Islr,ref|NM_012043	Islr	chr9	58157381	58157381	-	NM_012043	NM_012043	G	A	0	missense	SNM	c.842C>T	p.A281V	281	281	0.0928571	0	140	59	1	0.857143
BWQ-67	PPMBC	ref|NM_146553,entg|Olfr806	Olfr806	chr10	129738501	129738501	-	NM_146553	NM_146553	A	G	0	missense	SNM	c.415T>C	p.C139R	139	139	0.091858	0	479	572	1	0.571429
BWQ-67	PPMBC	ref|NM_001163836,entg|Pabpc6	Pabpc6	chr17	9668727	9668727	-	NM_001163836	NM_001163836	G	A	0	silent	SNM	c.894C>T	p.S298S	298	298	0.111702	0	188	284	1	0.4
BWQ-67	PPMBC	entg|H2-Ab1,ref|NM_207105	H2-Ab1	chr17	34264823	34264823	+	NM_207105	NM_207105	T	C	0	missense	SNM	c.157T>C	p.Y53H	53	53	0.0754717	0	212	122	1	0.6
BWQ-67	PPMBC	entg|Fas,ref|NM_007987	Fas	chr19	34327162	34327162	+	NM_007987	NM_007987	C	A	0	nonsense	SNM	c.822C>A	p.Y274*	274	274	0.22449	0	98	193	1	0.833333
BWQ-69	PPMBC	ref|NM_133806,entg|Uap1	Uap1	chr1	170149361	170149361	-	NM_001305045	NM_001305045	T	A	0	missense	SNM	c.1268A>T	p.H423L	423	423	0.28	0	125	101	1	0.944444
BWQ-69	PPMBC	ref|NM_147017,entg|Olfr1045	Olfr1045	chr2	86198405	86198405	-	NM_147017	NM_147017	C	T	0	missense	SNM	c.346G>A	p.A116T	116	116	0.163194	0	576	754	1	0.807692
BWQ-69	PPMBC	ref|NM_146893,entg|Olfr1216	Olfr1216	chr2	89013598	89013598	-	NM_146893	NM_146893	A	T	0	silent	SNM	c.465T>A	p.A155A	155	155	0.19598	0	199	580	1	0.857143
BWQ-69	PPMBC	ref|NM_001105184,entg|Vmn2r71	Vmn2r71	chr7	85621272	85621272	+	NM_001105184	NM_001105184	A	C	0	missense	SNM	c.1645A>C	p.T549P	549	549	0.612245	0	49	566	1	0.304348
BWQ-69	PPMBC	ref|NM_001011866,entg|Olfr309	Olfr309	chr7	86306363	86306363	-	NM_001011866	NM_001011866	T	G	0	missense	SNM	c.749A>C	p.Y250S	250	250	0.657895	0	152	193	1	0.538462
BWQ-69	PPMBC	entg|Hsd17b3,ref|NM_008291	Hsd17b3	chr13	64059516	64059516	-	NM_008291	NM_008291	T	C	0	missense	SNM	c.710A>G	p.N237S	237	237	0.234694	0	98	266	1	0.533333
BWQ-69	PPMBC	entg|Ercc4,ref|NM_015769	Ercc4	chr16	13109994	13109994	+	NM_015769	NM_015769	G	A	0	silent	SNM	c.60G>A	p.R20R	20	20	0.232877	0	73	67	1	0.888889
BWQ-69	PPMBC	ref|NM_001161366,ref|NM_001161367,ref|NM_198418,entg|Tdrd6,entg|Tdrd6,entg|Tdrd6	Tdrd6	chr17	43624253	43624253	-	NM_001161366	NM_001161366	C	T	0	missense	SNM	c.5903G>A	p.G1968D	1968	1968	0.116071	0	112	198	1	0.857143
BWQ-69	PPMBC	entg|Fbn2,ref|NM_010181	Fbn2	chr18	58021182	58021182	-	NM_010181	NM_010181	C	T	0	missense	SNM	c.7582G>A	p.E2528K	2528	2528	0.297619	0	168	235	1	0.612903
BWQ-69	PPMBC	ref|NM_001011841,entg|Olfr1465	Olfr1465	chr19	13313586	13313586	-	NM_001011841	NM_001011841	C	T	0	missense	SNM	c.698G>A	p.G233E	233	233	0.565217	0	69	237	1	0.392857
BWQ-69	PPMBC	entg|Gm16390,ref|NM_001097980	Gm16390	chrX	154887543	154887543	-	NM_001097980	NM_001097980	G	A	0	missense	SNM	c.179C>T	p.T60I	60	60	0.35	0	240	308	1	0.826087
BWQ-69	PPMBC	ref|NM_001177879,entg|Phka2,ref|NM_172783,entg|Phka2,ref|NM_001177878,entg|Phka2	Phka2	chrX	160581179	160581179	+	NM_172783	NM_172783	C	T	0	missense	SNM	c.2927C>T	p.S976F	976	976	0.333333	0	39	146	1	0.181818
BWQ-69	PPMBC	ref|NM_001163554,ref|NM_001163555,ref|NM_001163556,ref|NM_011138,entg|Pou2f2,entg|Pou2f2,entg|Pou2f2,entg|Pou2f2	Pou2f2	chr7	25116100	25116100	-	NM_001163554	NM_001163554	-	G	0	frame_shift_ins	INS	c.241_242insC	p.Q81fs	81	81	0.342466	0	73	72	1	0.785714
BWQ-71	PPMBC	entg|Klhl2,ref|NM_178633	Klhl2	chr8	64758105	64758105	-	NM_178633	NM_178633	A	C	0	missense	SNM	c.908T>G	p.M303R	303	303	0.380282	0	213	129	1	0.723404
BWQ-71	PPMBC	entg|Grip1,ref|NM_133442,entg|Grip1,entg|Grip1,ref|NM_028736,ref|NM_130891	Grip1	chr10	120054917	120054927	+	NM_028736	NM_028736	CAGGAACGGAG	-----------	0	frame_shift_del	DEL	c.2860_2870delCAGGAACGGAG	p.Q954fs	954	954	0.278261	0	115	121	1	1
BWQ-71	PPMBC	entg|Grip1,ref|NM_133442,entg|Grip1,entg|Grip1,ref|NM_028736,ref|NM_130891	Grip1	chr10	120054922	120054933	+	NM_028736	NM_028736	ACGGAGCAGTTC	------------	0	in_frame_del	DEL	c.2865_2876delACGGAGCAGTTC	p.E955_S959delinsE	955	958	0.148649	0	74	112	1	0.833333
BWQ-71	PPMBC	ref|NM_001025309,ref|NM_144859,entg|Pja2,entg|Pja2	Pja2	chr17	64290047	64290047	-	NM_001025309	NM_001025309	G	-	0	splice	DEL	c.1650_splice	e7-3	550	550	0.3125	0	16	56	1	0
BWQ-92	PPMBC	entg|Dnahc7b,ref|NM_001160386	Dnah7b	chr1	46241039	46241039	+	NM_001160386	NM_001160386	C	T	0	silent	SNM	c.8127C>T	p.C2709C	2709	2709	0.266272	0	169	299	1	0.5
BWQ-92	PPMBC	entg|Celf2,entg|Celf2,entg|Celf2,ref|NM_001110228,ref|NM_001160293,ref|NM_010160,entg|Celf2,entg|Celf2,entg|Celf2,ref|NM_001110229,ref|NM_001110230,ref|NM_001160292,entg|Celf2,ref|NM_001110232,entg|Celf2,ref|NM_001110231	Celf2	chr2	6547204	6547204	-	NM_001160293	NM_001160293	C	T	0	missense	SNM	c.1463G>A	p.S488N	488	488	0.229412	0	170	221	1	0.21875
BWQ-92	PPMBC	entg|Arhgef26,ref|NM_001081295	Arhgef26	chr3	62432565	62432565	+	NM_001081295	NM_001081295	G	T	0	silent	SNM	c.2007G>T	p.L669L	669	669	0.0520833	0	192	202	1	0.428571
BWQ-92	PPMBC	ref|NM_001104619,entg|Vmn2r6	Vmn2r6	chr3	64556096	64556096	-	NM_001104619	NM_001104619	G	A	0	missense	SNM	c.1049C>T	p.A350V	350	350	0.572254	0.00168634	173	593	1	0.32
BWQ-92	PPMBC	entg|Kcna3,ref|NM_008418	Kcna3	chr3	107037430	107037430	+	NM_008418	NM_008418	G	A	0	silent	SNM	c.1008G>A	p.G336G	336	336	0.0449735	0	378	474	1	0.7
BWQ-92	PPMBC	ref|NM_025919,entg|Rpl11	Rpl11	chr4	136052666	136052666	-	NM_025919	NM_025919	G	A	0	missense	SNM	c.58C>T	p.L20F	20	20	0.238095	0	294	374	1	0.428571
BWQ-92	PPMBC	ref|NM_008713,entg|Nos3	Nos3	chr5	24382630	24382630	+	NM_008713	NM_008713	C	T	0	silent	SNM	c.3087C>T	p.H1029H	1029	1029	0.442308	0	104	186	1	0.84
BWQ-92	PPMBC	entg|Gak,ref|NM_153569	Gak	chr5	108592348	108592348	-	NM_153569	NM_153569	G	A	0	missense	SNM	c.1700C>T	p.T567M	567	567	0.57764	0.00510204	161	196	1	0.223684
BWQ-92	PPMBC	ref|NM_018815,entg|Nup210	Nup210	chr6	91042360	91042360	-	NM_018815	NM_018815	C	T	0	silent	SNM	c.3123G>A	p.T1041T	1041	1041	0.467532	0	154	275	1	0.565217
BWQ-92	PPMBC	entg|Bhlhe41,ref|NM_024469	Bhlhe41	chr6	145863319	145863319	-	NM_024469	NM_024469	G	C	0	missense	SNM	c.766C>G	p.L256V	256	256	0.384615	0	26	27	1	0.428571
BWQ-92	PPMBC	entg|Irf2bp2,ref|NM_001164598	Irf2bp2	chr8	126592522	126592522	-	NM_001164598	NM_001164598	G	A	0	silent	SNM	c.915C>T	p.S305S	305	305	0.122449	0	49	124	1	1
BWQ-92	PPMBC	entg|Irf2bp2,ref|NM_001164598	Irf2bp2	chr8	126592781	126592781	-	NM_001164598	NM_001164598	C	A	0	missense	SNM	c.656G>T	p.G219V	219	219	0.137931	0	58	45	1	0.6
BWQ-92	PPMBC	entg|Irf2bp2,ref|NM_001164598	Irf2bp2	chr8	126592918	126592918	-	NM_001164598	NM_001164598	C	T	0	silent	SNM	c.519G>A	p.R173R	173	173	0.114458	0	166	130	1	0.583333
BWQ-92	PPMBC	entg|Irf2bp2,ref|NM_001164598	Irf2bp2	chr8	126592956	126592956	-	NM_001164598	NM_001164598	C	T	0	missense	SNM	c.481G>A	p.E161K	161	161	0.0903226	0	151	115	1	0.555556
BWQ-92	PPMBC	entg|Irf2bp2,ref|NM_001164598	Irf2bp2	chr8	126592960	126592960	-	NM_001164598	NM_001164598	C	T	0	silent	SNM	c.477G>A	p.L159L	159	159	0.0952381	0	147	110	1	0.555556
BWQ-92	PPMBC	entg|Irf2bp2,ref|NM_001164598	Irf2bp2	chr8	126593157	126593157	-	NM_001164598	NM_001164598	G	T	0	missense	SNM	c.280C>A	p.P94T	94	94	0.230769	0	77	27	1	0.384615
BWQ-92	PPMBC	entg|Irf2bp2,ref|NM_001164598	Irf2bp2	chr8	126593252	126593252	-	NM_001164598	NM_001164598	G	A	0	missense	SNM	c.185C>T	p.A62V	62	62	0.1125	0	79	77	1	0.5
BWQ-92	PPMBC	entg|Arhgap42,ref|NM_027823	Arhgap42	chr9	9029453	9029453	-	NM_027823	NM_027823	A	C	0	missense	SNM	c.1030T>G	p.L344V	344	344	0.323529	0	238	433	1	0.571429
BWQ-92	PPMBC	entg|Man1a,ref|NM_008548	Man1a	chr10	54074880	54074880	-	NM_008548	NM_008548	C	A	0	missense	SNM	c.145G>T	p.V49L	49	49	0.191011	0	89	207	1	0.545455
BWQ-92	PPMBC	ref|NM_001164223,ref|NM_026653,entg|Rpa1,entg|Rpa1	Rpa1	chr11	75301323	75301323	-	NM_001164223	NM_001164223	G	T	0	missense	SNM	c.1917C>A	p.N639K	639	639	0.255814	0	215	344	1	0.774194
BWQ-92	PPMBC	entg|Ace,ref|NM_207624	Ace	chr11	105974125	105974125	+	NM_207624	NM_207624	G	T	0	silent	SNM	c.1623G>T	p.L541L	541	541	0.244898	0	98	196	1	0.714286
BWQ-92	PPMBC	ref|NM_144549,entg|Trib1	Trib1	chr15	59649339	59649340	+	NM_144549	NM_144549	CC	TT	0	missense	DNM	c.177_178delinsTT	p.L60F	60	60	0.341486	0	61	84	1	0.5
BWQ-92	PPMBC	ref|NM_144549,entg|Trib1	Trib1	chr15	59649461	59649461	+	NM_144549	NM_144549	C	T	0	missense	SNM	c.299C>T	p.A100V	100	100	0.163636	0	110	120	1	1
BWQ-92	PPMBC	entg|Fndc1,ref|NM_001081416	Fndc1	chr17	7769676	7769676	-	NM_001081416	NM_001081416	C	T	0	missense	SNM	c.3553G>A	p.G1185S	1185	1185	0.138983	0	295	405	1	0.464286
BWQ-92	PPMBC	ref|NM_008842,entg|Pim1	Pim1	chr17	29491216	29491216	+	NM_008842	NM_008842	C	T	0	silent	SNM	c.73C>T	p.L25L	25	25	0.225352	0	71	117	1	0.6
BWQ-92	PPMBC	ref|NM_011495,entg|Plk4	Plk4	chr3	40805096	40805096	+	NM_011495	NM_011495	----	CTTA	0	frame_shift_ins	INS	c.425_426insCTTA	p.I142fs	142	142	0.220588	0	136	227	1	0.875
BWQ-92	PPMBC	ref|NM_001037709,entg|Rusc2,ref|NM_199057,entg|Rusc2	Rusc2	chr4	43416167	43416167	+	NM_001037709	NM_001037709	-	C	0	frame_shift_ins	INS	c.1471_1472insC	p.S491fs	491	491	0.32	0.011236	50	178	1	1
BWQ-92	PPMBC	entg|Irf2bp2,ref|NM_001164598	Irf2bp2	chr8	126592832	126592871	-	NM_001164598	NM_001164598	AGTGTGGCCGCAGCACGGCCGCTCAACCCCAGCGCGGCAG	----------------------------------------	0	frame_shift_del	DEL	c.566_605delCTGCCGCGCTGGGGTTGAGCGGCCGTGCTGCGGCCACACT	p.S189fs	189	189	0.0921053	0	76	71	1	0.75
BWQ-92	PPMBC	entg|Man1a,ref|NM_008548	Man1a	chr10	54074878	54074878	-	NM_008548	NM_008548	C	-	0	frame_shift_del	DEL	c.147delG	p.V49fs	49	49	0.183908	0	87	207	1	0.6
BWQ-92	PPMBC	ref|NM_144549,entg|Trib1	Trib1	chr15	59649460	59649460	+	NM_144549	NM_144549	G	-	0	frame_shift_del	DEL	c.298delG	p.A100fs	100	100	0.0818182	0	110	120	1	0.5
BWQ-92	PPMBC	entg|Cdc37l1,ref|NM_025950	Cdc37l1	chr19	29007004	29007004	+	NM_025950	NM_025950	T	-	0	frame_shift_del	DEL	c.538delT	p.F180fs	180	180	0.287356	0	87	169	1	0.666667
BWQ-92	PPMBC	entg|Mum1l1,entg|Mum1l1,ref|NM_001164630,ref|NM_175541,entg|Mum1l1,entg|Mum1l1,entg|Mum1l1,ref|NM_001164631,ref|NM_001164632,ref|NM_001164633	Mum1l1	chrX	139236401	139236401	+	NM_001164633	NM_001164633	A	-	0	frame_shift_del	DEL	c.1687delA	p.K563fs	563	563	0.115385	0	104	190	1	0.5
BWQ-69	PPMBC	ref|NM_133806,entg|Uap1	Uap1	chr1	170149361	170149361	-	NM_001305045	NM_001305045	T	A	0	missense	SNM	c.1268A>T	p.H423L	423	423	0.316062	0	193	101	1	0.418605
BWQ-69	PPMBC	entg|Abl1,ref|NM_001112703,entg|Abl1,ref|NM_009594	Abl1	chr2	31790708	31790708	+	NM_001112703	NM_001112703	G	T	0	missense	SNM	c.1011G>T	p.M337I	337	337	0.0427046	0	281	311	1	0.714286
BWQ-69	PPMBC	ref|NM_146944,entg|Olfr348	Olfr348	chr2	36787320	36787320	+	NM_146944	NM_146944	C	A	0	nonsense	SNM	c.794C>A	p.S265*	265	265	0.0438871	0	319	353	1	0.75
BWQ-69	PPMBC	ref|NM_147017,entg|Olfr1045	Olfr1045	chr2	86198405	86198405	-	NM_147017	NM_147017	C	T	0	missense	SNM	c.346G>A	p.A116T	116	116	0.190045	0	884	754	1	0.513514
BWQ-69	PPMBC	ref|NM_146893,entg|Olfr1216	Olfr1216	chr2	89013598	89013598	-	NM_146893	NM_146893	A	T	0	silent	SNM	c.465T>A	p.A155A	155	155	0.193642	0	346	580	1	0.488889
BWQ-69	PPMBC	ref|NM_030701,entg|Niacr1	Hcar2	chr5	123865153	123865153	-	NM_030701	NM_030701	G	C	0	missense	SNM	c.286C>G	p.P96A	96	96	0.0600707	0	283	96	1	0.545455
BWQ-69	PPMBC	ref|NM_001105184,entg|Vmn2r71	Vmn2r71	chr7	85621272	85621272	+	NM_001105184	NM_001105184	A	C	0	missense	SNM	c.1645A>C	p.T549P	549	549	0.697248	0	109	566	1	0.225806
BWQ-69	PPMBC	ref|NM_001011866,entg|Olfr309	Olfr309	chr7	86306363	86306363	-	NM_001011866	NM_001011866	T	G	0	missense	SNM	c.749A>C	p.Y250S	250	250	0.74	0	250	193	1	0.666667
BWQ-69	PPMBC	ref|NM_153399,entg|Syne1	Syne1	chr10	5352099	5352099	-	NM_153399	NM_153399	G	T	0	missense	SNM	c.2650C>A	p.H884N	884	884	0.151899	0	158	186	1	0.411765
BWQ-69	PPMBC	entg|Jkamp,entg|Jkamp,ref|NM_001205067,ref|NM_024205	Jkamp	chr12	72100827	72100827	+	NM_024205	NM_024205	G	T	0	nonstop	SNM	c.935G>T	p.*312L	312	312	0.208333	0	24	56	1	0.25
BWQ-69	PPMBC	entg|Hsd17b3,ref|NM_008291	Hsd17b3	chr13	64059516	64059516	-	NM_008291	NM_008291	T	C	0	missense	SNM	c.710A>G	p.N237S	237	237	0.290155	0	193	266	1	0.333333
BWQ-69	PPMBC	entg|Ercc4,ref|NM_015769	Ercc4	chr16	13109994	13109994	+	NM_015769	NM_015769	G	A	0	silent	SNM	c.60G>A	p.R20R	20	20	0.25	0	76	67	1	0.266667
BWQ-69	PPMBC	entg|Fbn2,ref|NM_010181	Fbn2	chr18	58021182	58021182	-	NM_010181	NM_010181	C	T	0	missense	SNM	c.7582G>A	p.E2528K	2528	2528	0.277778	0	198	235	1	0.447368
BWQ-69	PPMBC	ref|NM_001011841,entg|Olfr1465	Olfr1465	chr19	13313586	13313586	-	NM_001011841	NM_001011841	C	T	0	missense	SNM	c.698G>A	p.G233E	233	233	0.503817	0	131	237	1	0.32
BWQ-69	PPMBC	entg|Gm16390,ref|NM_001097980	Gm16390	chrX	154887543	154887543	-	NM_001097980	NM_001097980	G	A	0	missense	SNM	c.179C>T	p.T60I	60	60	0.360731	0	438	308	1	0.295082
BWQ-69	PPMBC	ref|NM_001177879,entg|Phka2,ref|NM_172783,entg|Phka2,ref|NM_001177878,entg|Phka2	Phka2	chrX	160581179	160581179	+	NM_172783	NM_172783	C	T	0	missense	SNM	c.2927C>T	p.S976F	976	976	0.279412	0	68	146	1	0.583333
BWQ-69	PPMBC	ref|NM_001163554,ref|NM_001163555,ref|NM_001163556,ref|NM_011138,entg|Pou2f2,entg|Pou2f2,entg|Pou2f2,entg|Pou2f2	Pou2f2	chr7	25116100	25116100	-	NM_001163554	NM_001163554	-	G	0	frame_shift_ins	INS	c.241_242insC	p.Q81fs	81	81	0.456693	0	127	72	1	0.414634
BWQ-85	PPMBC	entg|Kcnj3,ref|NM_008426	Kcnj3	chr2	55437319	55437319	+	NM_008426	NM_008426	A	C	0	missense	SNM	c.119A>C	p.K40T	40	40	0.0750988	0	252	166	1	0.583333
BWQ-85	PPMBC	ref|NM_011652,ref|NM_028004,entg|Ttn,entg|Ttn	Ttn	chr2	76885576	76885576	-	NM_011652	NM_011652	C	A	0	silent	SNM	c.20676G>T	p.P6892P	6892	6892	0.443478	0.00595238	115	168	1	0.243902
BWQ-85	PPMBC	entg|Dusp2,ref|NM_010090	Dusp2	chr2	127337443	127337443	+	NM_010090	NM_010090	G	T	0	missense	SNM	c.717G>T	p.W239C	239	239	0.0706522	0	184	142	1	0.444444
BWQ-85	PPMBC	ref|NM_009416,entg|Tpm2	Tpm2	chr4	43519671	43519671	-	NM_001277876	NM_001277876	C	T	0	missense	SNM	c.314G>A	p.R105H	105	105	0.0731707	0	164	160	1	0.5
BWQ-85	PPMBC	entg|Ccdc146,ref|NM_029195,entg|Fgl2,ref|NM_008013	Fgl2	chr5	21373124	21373124	+	NM_008013	NM_008013	G	C	0	missense	SNM	c.408G>C	p.E136D	136	136	0.0748299	0	294	219	1	0.692308
BWQ-85	PPMBC	entg|Alox5ap,ref|NM_009663	Alox5ap	chr5	149287629	149287629	+	NM_009663	NM_009663	C	T	0	silent	SNM	c.381C>T	p.F127F	127	127	0.0989399	0.00295858	283	338	1	0.75
BWQ-85	PPMBC	ref|NM_001081306,entg|Ptprz1	Ptprz1	chr6	23000471	23000471	+	NM_001081306	NM_001081306	C	G	0	silent	SNM	c.2559C>G	p.V853V	853	853	0.105372	0	484	432	1	0.5
BWQ-85	PPMBC	ref|NM_001013366,entg|Wdr91	Wdr91	chr6	34910747	34910747	-	NM_001013366	NM_001013366	G	A	0	silent	SNM	c.73C>T	p.L25L	25	25	0.461538	0	52	111	1	0.333333
BWQ-85	PPMBC	entg|Hoxa3,ref|NM_010452,entg|2700086A05Rik,ref|NR_015611,entg|Hoxa5,ref|NM_010453	Hoxa5	chr6	52204135	52204135	-	NM_010453	NM_010453	G	C	0	missense	SNM	c.216C>G	p.S72R	72	72	0.137931	0	87	82	1	1
BWQ-85	PPMBC	entg|Bhlhe41,ref|NM_024469	Bhlhe41	chr6	145863131	145863131	-	NM_024469	NM_024469	C	T	0	silent	SNM	c.954G>A	p.L318L	318	318	0.256579	0	152	102	1	0.147059
BWQ-85	PPMBC	entg|Egln2,ref|NM_053208	Egln2	chr7	27165392	27165392	-	NM_053208	NM_053208	C	T	0	missense	SNM	c.107G>A	p.S36N	36	36	0.101562	0	128	206	1	0.444444
BWQ-85	PPMBC	entg|Ccdc123,ref|NM_028120	Cep89	chr7	35424759	35424759	+	NM_028120	NM_028120	G	A	0	silent	SNM	c.1371G>A	p.A457A	457	457	0.497297	0	185	166	1	0.164557
BWQ-85	PPMBC	ref|NM_001122873,ref|NM_027086,entg|Ubl7,entg|Ubl7	Ubl7	chr9	57912703	57912703	+	NM_027086	NM_027086	G	T	0	missense	SNM	c.37G>T	p.A13S	13	13	0.0909091	0	319	123	1	0.526316
BWQ-85	PPMBC	entg|Man1a,ref|NM_008548	Man1a	chr10	54074676	54074676	-	NM_008548	NM_008548	C	G	0	missense	SNM	c.349G>C	p.A117P	117	117	0.3	0	90	108	1	0.8
BWQ-85	PPMBC	ref|NM_027423,entg|Polr3b	Polr3b	chr10	84720450	84720450	+	NM_027423	NM_027423	A	T	0	missense	SNM	c.3205A>T	p.M1069L	1069	1069	0.0458937	0	414	230	1	0.461538
BWQ-85	PPMBC	ref|NM_019507,entg|Tbx21	Tbx21	chr11	97114821	97114821	-	NM_019507	NM_019507	C	T	0	missense	SNM	c.317G>A	p.G106D	106	106	0.0952381	0	63	126	1	0.5
BWQ-85	PPMBC	ref|NM_198100,entg|Tbkbp1	Tbkbp1	chr11	97138728	97138728	-	NM_198100	NM_198100	C	T	0	missense	SNM	c.1598G>A	p.G533D	533	533	0.0688073	0	218	87	1	0.666667
BWQ-85	PPMBC	ref|NM_029294,entg|Prps1l1	Prps1l1	chr12	34985156	34985156	+	NM_029294	NM_029294	C	T	0	missense	SNM	c.269C>T	p.P90L	90	90	0.254826	0	259	279	1	0.534884
BWQ-85	PPMBC	entg|Hist1h3h,ref|NM_178206	Hist1h3h	chr13	21717918	21717918	+	NM_178206	NM_178206	G	A	0	missense	SNM	c.260G>A	p.S87N	87	87	0.0722581	0	775	249	1	0.931034
BWQ-85	PPMBC	entg|Hist1h1d,ref|NM_145713	Hist1h1d	chr13	23555386	23555386	+	NM_145713	NM_145713	C	T	0	silent	SNM	c.297C>T	p.G99G	99	99	0.0575758	0	330	214	1	0.727273
BWQ-85	PPMBC	entg|4933425L06Rik,ref|NM_025751	4933425L06Rik	chr13	105082270	105082270	+	NM_025751	NM_025751	C	T	0	silent	SNM	c.111C>T	p.S37S	37	37	0.0827338	0	278	129	1	0.642857
BWQ-85	PPMBC	entg|Kcnv1,ref|NM_026200	Kcnv1	chr15	45114388	45114388	-	NM_026200	NM_026200	C	T	0	missense	SNM	c.253G>A	p.A85T	85	85	0.0496689	0	302	128	1	0.5
BWQ-85	PPMBC	entg|Clcf1,ref|NM_019952	Clcf1	chr19	4222231	4222231	+	NM_019952	NM_019952	T	A	0	missense	SNM	c.341T>A	p.L114Q	114	114	0.316279	0	215	75	1	0.172414
BWQ-85	PPMBC	entg|2010002M12Rik,ref|NM_053217	2010002M12Rik	chr19	34619184	34619184	-	NM_053217	NM_053217	T	G	0	missense	SNM	c.1031A>C	p.Y344S	344	344	0.100313	0	319	438	1	0.6
BWQ-85	PPMBC	entg|Cxcr3,ref|NM_009910	Cxcr3	chrX	101732459	101732459	-	NM_009910	NM_009910	G	T	0	missense	SNM	c.596C>A	p.A199D	199	199	0.142857	0	119	201	1	0.888889
BWQ-85	PPMBC	entg|Cxcr3,ref|NM_009910	Cxcr3	chrX	101732461	101732461	-	NM_009910	NM_009910	A	T	0	missense	SNM	c.594T>A	p.N198K	198	198	0.128205	0	117	201	1	0.875
BWQ-85	PPMBC	entg|Cxcr3,ref|NM_009910	Cxcr3	chrX	101732464	101732475	-	NM_009910	NM_009910	GAGGCGCTGATC	------------	0	in_frame_del	DEL	c.580_591delGATCAGCGCCTC	p.D194_L197del	194	197	0.135593	0	118	198	1	1
BWQ-56	PPMBC	entg|Cdh19,ref|NM_001081386	Cdh19	chr1	110932182	110932182	-	NM_001081386	NM_001081386	G	A	0	nonsense	SNM	c.568C>T	p.R190*	190	190	0.0833333	0	84	116	1	0.4
BWQ-56	PPMBC	ref|NM_146406,entg|Olfr1076	Olfr1076	chr2	86508542	86508542	+	NM_146406	NM_146406	T	A	0	missense	SNM	c.82T>A	p.F28I	28	28	0.0601504	0	399	507	1	0.714286
BWQ-56	PPMBC	ref|NM_146590,entg|Olfr1085	Olfr1085	chr2	86658406	86658406	-	NM_146590	NM_146590	G	A	0	silent	SNM	c.51C>T	p.I17I	17	17	0.327327	0	333	248	1	0.197802
BWQ-56	PPMBC	ref|NM_001033196,entg|Znfx1	Znfx1	chr2	167042656	167042656	-	NM_001033196	NM_001033196	C	T	0	missense	SNM	c.2675G>A	p.R892K	892	892	0.125714	0	175	167	1	0.466667
BWQ-56	PPMBC	entg|Mcl1,ref|NM_008562	Mcl1	chr3	95659766	95659766	+	NM_008562	NM_008562	C	T	0	missense	SNM	c.637C>T	p.L213F	213	213	0.222535	0	355	244	1	0.58
BWQ-56	PPMBC	ref|NM_009193,entg|Slbp	Slbp	chr5	33651963	33651963	-	NM_009193	NM_009193	C	G	0	missense	SNM	c.176G>C	p.S59T	59	59	0.181818	0	44	91	1	0.6
BWQ-56	PPMBC	ref|NM_009193,entg|Slbp	Slbp	chr5	33652023	33652023	-	NM_009193	NM_009193	T	C	0	missense	SNM	c.116A>G	p.D39G	39	39	0.244444	0	90	73	1	0.375
BWQ-56	PPMBC	ref|NM_026376,entg|Plxnd1	Plxnd1	chr6	115978535	115978535	-	NM_026376	NM_026376	C	T	0	missense	SNM	c.1570G>A	p.V524I	524	524	0.486957	0	230	175	1	0.108911
BWQ-56	PPMBC	ref|NM_001163554,ref|NM_001163555,ref|NM_001163556,ref|NM_011138,entg|Pou2f2,entg|Pou2f2,entg|Pou2f2,entg|Pou2f2	Pou2f2	chr7	25121061	25121061	-	NM_001163554	NM_001163554	G	C	0	splice	SNM	c.95_splice	e4-3	31	31	0.520458	0	611	436	1	0.256917
BWQ-56	PPMBC	ref|NM_001011845,entg|Olfr597	Olfr597	chr7	103320638	103320638	+	NM_001011845	NM_001011845	T	C	0	missense	SNM	c.226T>C	p.C76R	76	76	0.327331	0	944	557	1	0.355263
BWQ-56	PPMBC	entg|Irf2bp2,ref|NM_001164598	Irf2bp2	chr8	126592944	126592944	-	NM_001164598	NM_001164598	G	A	0	silent	SNM	c.493C>T	p.L165L	165	165	0.215548	0	283	128	1	0.297872
BWQ-56	PPMBC	ref|NM_021544,entg|Scn5a	Scn5a	chr9	119521188	119521188	-	NM_001253860	NM_001253860	G	A	0	silent	SNM	c.2619C>T	p.S873S	873	873	0.133588	0	262	308	1	0.944444
BWQ-56	PPMBC	entg|Ikzf3,ref|NM_011771	Ikzf3	chr11	98477003	98477003	-	NM_011771	NM_011771	A	C	0	missense	SNM	c.747T>G	p.S249R	249	249	0.236264	0	364	197	1	0.162162
BWQ-56	PPMBC	ref|NM_001008550,entg|Zfyve26	Zfyve26	chr12	79295576	79295576	-	NM_001008550	NM_001008550	G	A	0	missense	SNM	c.95C>T	p.A32V	32	32	0.245902	0	183	181	1	0.285714
BWQ-56	PPMBC	entg|1700020O03Rik,ref|NM_027405	Gpatch2l	chr12	86244454	86244454	+	NM_027405	NM_027405	C	T	0	missense	SNM	c.410C>T	p.S137F	137	137	0.155738	0	366	232	1	0.628571
BWQ-56	PPMBC	entg|Hist1h2bp,ref|NM_178202	Hist1h2bp	chr13	21787662	21787662	+	NM_178202	NM_178202	C	T	0	missense	SNM	c.148C>T	p.H50Y	50	50	0.173875	0	1155	270	1	0.415493
BWQ-56	PPMBC	ref|NM_001113417,entg|Thrb,ref|NM_009380,entg|Thrb	Thrb	chr14	18008609	18008609	+	NM_009380	NM_009380	C	A	0	missense	SNM	c.467C>A	p.S156Y	156	156	0.224138	0	116	206	1	0.368421
BWQ-56	PPMBC	entg|Eppk1,ref|NM_144848	Eppk1	chr15	76105986	76105986	-	NM_144848	NM_144848	T	C	0	missense	SNM	c.6694A>G	p.S2232G	2232	2232	0.202941	0	340	300	1	0.604651
BWQ-56	PPMBC	ref|NM_001163498,entg|Rundc2a	Snx29	chr16	11347863	11347863	+	NM_028964	NM_028964	G	A	0	silent	SNM	c.12G>A	p.S4S	4	4	0.178462	0	325	345	1	0.487179
BWQ-56	PPMBC	entg|Mrpl40,ref|NM_010922	Mrpl40	chr16	18876474	18876474	-	NM_010922	NM_010922	C	G	0	missense	SNM	c.50G>C	p.S17T	17	17	0.142857	0	63	173	1	0.5
BWQ-56	PPMBC	ref|NM_001005524,entg|Olfr194	Olfr194	chr16	59119782	59119782	-	NM_001005524	NM_001005524	C	T	0	missense	SNM	c.287G>A	p.C96Y	96	96	0.164804	0	358	343	1	0.84375
BWQ-56	PPMBC	ref|NM_008842,entg|Pim1	Pim1	chr17	29491206	29491206	+	NM_008842	NM_008842	C	T	0	silent	SNM	c.63C>T	p.H21H	21	21	0.242424	0	99	117	1	0.714286
BWQ-56	PPMBC	ref|NM_172829,entg|St6gal2	St6gal2	chr17	55498295	55498295	+	NM_172829	NM_172829	A	G	0	missense	SNM	c.1192A>G	p.T398A	398	398	0.126923	0	260	278	1	0.434783
BWQ-56	PPMBC	entg|4932429P05Rik,ref|NM_001085511	4932429P05Rik	chrX	89753900	89753900	+	NM_001085511	NM_001085511	A	G	0	missense	SNM	c.1337A>G	p.E446G	446	446	0.0918367	0	98	210	1	0.5
BWQ-56	PPMBC	ref|NM_001082476,entg|Ndor1	Ndor1	chr2	25248725	25248731	-	NM_001252542	NM_001252542	TCTGTAG	-------	0	frame_shift_del	DEL	c.982_988delCTACAGA	p.L328fs	328	328	0.0536723	0	354	133	1	0.461538
BWQ-56	PPMBC	ref|NM_009519,entg|Wnt11	Wnt11	chr7	98847389	98847389	+	NM_001285792	NM_001285792	-	A	0	frame_shift_ins	INS	c.534_535insA	p.K179fs	179	179	0.230088	0	113	145	1	0.181818
BWQ-56	PPMBC	entg|Mrpl40,ref|NM_010922	Mrpl40	chr16	18876460	18876468	-	NM_010922	NM_010922	GCTACACTC	---------	0	splice	DEL	c.53_splice	e2+3_+11	17	17	0.116667	0	60	157	1	0.4
M-013	MBC	entg|Hist1h1e,ref|NM_015787	Hist1h1e	chr13	23622319	23622319	-	NM_015787	NM_015787	G	A	0	missense	SNM	c.179C>T	p.A60V	60	60	0.393617	0	94	132	28	0.681818
M-013	MBC	entg|Lrig3,ref|NM_177152	Lrig3	chr10	126009933	126009933	+	NM_177152	NM_177152	T	G	0	missense	SNM	c.2230T>G	p.F744V	744	744	0.37069	0.00378788	116	264	0	0.791667
M-013	MBC	ref|NM_019482,entg|Panx1	Panx1	chr9	15044872	15044872	-	NM_019482	NM_019482	G	A	0	nonsense	SNM	c.166C>T	p.Q56*	56	56	0.356322	0	87	113	78	0.409091
M-041	MBC	entg|Adam34,ref|NM_145745	Adam34	chr8	43651939	43651939	-	NM_145745	NM_145745	C	A	0	missense	SNM	c.668G>T	p.R223I	223	223	0.105263	0	209	377	0	0.157895
M-041	MBC	entg|Arrdc2,ref|NM_027560	Arrdc2	chr8	70839046	70839046	-	NM_027560	NM_027560	C	T	0	splice	SNM	c.275_splice	e3-1	91	91	0.114754	0	61	141	0	0.166667
M-041	MBC	entg|Cela1,ref|NM_033612	Cela1	chr15	100687132	100687132	-	NM_033612	NM_033612	G	C	0	missense	SNM	c.116C>G	p.P39R	39	39	0.326923	0	208	357	45	0.789474
M-041	MBC	entg|Gigyf1,ref|NM_031408	Gigyf1	chr5	137524822	137524822	+	NM_031408	NM_031408	C	T	0	missense	SNM	c.2584C>T	p.R862W	862	862	0.134021	0	97	126	0	0.857143
M-041	MBC	entg|Gm5346,ref|NM_001025240	Gm5346	chr8	43626329	43626329	-	NM_001025240	NM_001025240	G	A	0	missense	SNM	c.857C>T	p.A286V	286	286	0.179104	0	134	295	0	0.6
M-041	MBC	entg|Igfbp2,ref|NM_008342	Igfbp2	chr1	72852117	72852117	+	NM_008342	NM_008342	C	A	0	missense	SNM	c.873C>A	p.N291K	291	291	0.366197	0	71	154	29	0.857143
M-041	MBC	entg|Kcnc2,ref|NM_001025581	Kcnc2	chr10	112455743	112455743	+	NM_001025581	NM_001025581	G	A	0	missense	SNM	c.835G>A	p.E279K	279	279	0.44186	0	86	253	38	0.9
M-041	MBC	ref|NM_146687,entg|Olfr1436	Olfr1436	chr19	12298617	12298617	-	NM_146687	NM_146687	A	C	0	missense	SNM	c.514T>G	p.F172V	172	172	0.11811	0	254	467	0	0.578947
M-041	MBC	ref|NM_008507,entg|Sh2b3	Sh2b3	chr5	121818996	121818996	-	NM_008507	NM_008507	C	T	0	missense	SNM	c.785G>A	p.G262E	262	262	0.452174	0	115	233	59	1
M-041	MBC	ref|NM_011528,entg|Taldo1	Taldo1	chr7	141402226	141402226	+	NM_011528	NM_011528	C	A	0	missense	SNM	c.878C>A	p.A293D	293	293	0.153846	0	65	120	0	0.666667
M-041	MBC	ref|NM_134165,entg|Vmn1r37	Vmn1r37	chr6	66731533	66731533	+	NM_134165	NM_134165	A	G	0	missense	SNM	c.142A>G	p.I48V	48	48	0.15	0	20	22	0	0.5
M-042	MBC	entg|Capn12,ref|NM_001110807	Capn12	chr7	28887943	28887943	+	NM_001110807	NM_001110807	G	C	0	missense	SNM	c.1253G>C	p.R418T	418	418	0.444444	0	72	141	61	0.684211
M-042	MBC	entg|Dhtkd1,ref|NM_001081131	Dhtkd1	chr2	5902978	5902978	-	NM_001081131	NM_001081131	C	T	0	missense	SNM	c.2395G>A	p.D799N	799	799	0.41573	0	89	229	44	0.541667
M-042	MBC	entg|Lilra5,ref|NM_001081239	Lilra5	chr7	4242215	4242215	+	NM_001081239	NM_001081239	C	A	0	missense	SNM	c.857C>A	p.A286D	286	286	0.367347	0	49	97	44	0.636364
M-042	MBC	entg|Heatr7b2,ref|NM_001166066	Mroh2b	chr15	4921401	4921401	+	NM_001166066	NM_001166066	T	C	0	missense	SNM	c.1780T>C	p.F594L	594	594	0.223958	0	192	325	0	0.387097
M-042	MBC	ref|NM_001008548,ref|NM_001143848,entg|Pde2a,entg|Pde2a,ref|NM_001143849,entg|Pde2a,ref|NR_026574,entg|Pde2a	Pde2a	chr7	101484594	101484594	+	NM_001243758	NM_001243758	A	C	0	missense	SNM	c.311A>C	p.D104A	104	104	0.430233	0	86	209	54	0.608696
M-042	MBC	ref|NM_009472,entg|Unc5c	Unc5c	chr3	141789009	141789009	+	NM_001293561	NM_001293561	C	T	0	missense	SNM	c.1304C>T	p.S435F	435	435	0.0703125	0	128	318	0	0.8
M-043	MBC	entg|Cyp2c68,ref|NM_001039555	Cyp2c68	chr19	39689074	39689074	-	NM_001039555	NM_001039555	C	A	0	nonsense	SNM	c.1471G>T	p.E491*	491	491	0.0945274	0	201	492	0	0.461538
M-043	MBC	entg|Dnahc5,ref|NM_133365	Dnah5	chr15	28421636	28421636	+	NM_133365	NM_133365	A	C	0	missense	SNM	c.11633A>C	p.K3878T	3878	3878	0.0930233	0	86	206	0	0.6
M-043	MBC	entg|Ercc5,ref|NM_011729	Ercc5	chr1	44180877	44180877	+	NM_011729	NM_011729	C	T	0	missense	SNM	c.3308C>T	p.A1103V	1103	1103	0.0833333	0	72	146	0	1
M-043	MBC	entg|Gabrr2,ref|NM_008076	Gabrr2	chr4	33084443	33084443	+	NM_008076	NM_008076	G	T	0	missense	SNM	c.900G>T	p.M300I	300	300	0.404255	0	188	414	29	0.9
M-043	MBC	ref|NM_021568,entg|Pcbp3	Pcbp3	chr10	76789792	76789792	-	NM_021568	NM_021568	G	T	0	missense	SNM	c.417C>A	p.S139R	139	139	0.216216	0.00854701	37	117	0	0.6
M-043	MBC	ref|NM_138674,entg|Pkhd1l1	Pkhd1l1	chr15	44564354	44564354	+	NM_138674	NM_138674	T	C	0	missense	SNM	c.9806T>C	p.V3269A	3269	3269	0.188235	0	84	216	0	0.777778
M-043	MBC	ref|NM_013690,entg|Tek	Tek	chr4	94864629	94864629	+	NM_013690	NM_013690	G	C	0	missense	SNM	c.3084G>C	p.W1028C	1028	1028	0.0969697	0	165	384	0	0.6
M-043	MBC	ref|NM_146153,entg|Thrap3	Thrap3	chr4	126165423	126165427	-	NM_146153	NM_146153	CTTCT	-----	0	frame_shift_del	DEL	c.2825_2829delAGAAG	p.E942fs	942	942	0.240741	0	54	91	71	0.625
M-043	MBC	ref|NM_178732,entg|Zfp324	Zfp324	chr7	12971173	12971173	+	NM_178732	NM_178732	C	A	0	missense	SNM	c.1288C>A	p.P430T	430	430	0.424242	0	66	194	65	0.473684
M-043	MBC	ref|NM_001045536,entg|Zzef1	Zzef1	chr11	72916549	72916549	+	NM_001045536	NM_001045536	G	A	0	missense	SNM	c.8066G>A	p.S2689N	2689	2689	0.469697	0	66	126	86	0.24
M-046	MBC	entg|Abi3bp,entg|Abi3bp,entg|Abi3bp,entg|Abi3bp,entg|Abi3bp,ref|NM_001014399,ref|NM_001014422,ref|NM_001014423,ref|NM_001014424,ref|NM_178790	Abi3bp	chr16	56604651	56604651	+	NM_001014423	NM_001014423	C	T	0	nonsense	SNM	c.1447C>T	p.R483*	483	483	0.13245	0	151	344	0	0.818182
M-046	MBC	entg|Kcnk2,ref|NM_001159850,entg|Kcnk2,ref|NM_010607,entg|Kcnk2,ref|NR_027627	Kcnk2	chr1	189209935	189209935	-	NM_001159850	NM_001159850	G	A	0	missense	SNM	c.1136C>T	p.P379L	379	379	0.275362	0	69	123	0	0.357143
M-046	MBC	ref|NM_008842,entg|Pim1	Pim1	chr17	29491351	29491351	+	NM_008842	NM_008842	C	T	0	nonsense	SNM	c.109C>T	p.Q37*	37	37	0.421053	0	95	210	56	0.666667
M-046	MBC	ref|NM_021329,entg|Rangrf,entg|Gm4535,ref|NM_001101644	Rangrf	chr11	68973441	68973442	-	NM_001285441	NM_001285441	CG	--	0	frame_shift_del	DEL	c.217_218delCG	p.R73fs	73	73	0.26087	0	184	370	255	0.263158
M-046	MBC	ref|NM_011500,entg|Strn	Strn	chr17	78657890	78657890	-	NM_011500	NM_011500	C	A	0	missense	SNM	c.1972G>T	p.D658Y	658	658	0.397959	0	98	216	47	0.625
M-047	MBC	entg|Abcg2,ref|NM_011920	Abcg2	chr6	58655711	58655711	+	NM_011920	NM_011920	G	A	0	missense	SNM	c.55G>A	p.G19S	19	19	0.333333	0	90	228	26	0.666667
M-047	MBC	entg|Mtap7d2,ref|NM_001081124	Map7d2	chrX	159482280	159482280	+	NM_001081124	NM_001081124	C	T	0	missense	SNM	c.1213C>T	p.R405C	405	405	0.5625	0	32	177	255	0.384615
M-047	MBC	ref|NM_145827,entg|Nlrp3	Nlrp3	chr11	59555785	59555785	+	NM_145827	NM_145827	G	A	1	missense	SNM	c.2356G>A	p.D786N	786	786	0.51087	0	92	168	108	0.740741
M-070	MBC	entg|Chpf,entg|Chpf,ref|NM_001001565,ref|NM_001001566	Chpf	chr1	75477292	75477292	-	NM_001001566	NM_001001566	G	-	0	frame_shift_del	DEL	c.841delC	p.R281fs	281	281	0.434783	0	46	174	255	1
M-070	MBC	entg|Msh6,ref|NM_010830	Msh6	chr17	87984991	87984991	+	NM_010830	NM_010830	-	C	0	frame_shift_ins	INS	c.1172_1173insC	p.N391fs	391	391	0.05	0	140	270	37	0.75
M-070	MBC	ref|NM_001142918,ref|NM_001142919,ref|NM_001142920,ref|NM_001142921,ref|NM_001142922,ref|NM_001142923,ref|NM_009333,entg|Tcf7l2,entg|Tcf7l2,entg|Tcf7l2,entg|Tcf7l2,entg|Tcf7l2,entg|Tcf7l2,entg|Tcf7l2,ref|NM_001142924,entg|Tcf7l2	Tcf7l2	chr19	55931448	55931448	+	NM_001142922	NM_001142922	G	T	0	missense	SNM	c.1388G>T	p.C463F	463	463	0.196429	0	112	294	0	0.466667
M-071	MBC	entg|C1galt1c1,ref|NM_021550	C1galt1c1	chrX	38631647	38631647	-	NM_021550	NM_021550	T	A	0	missense	SNM	c.471A>T	p.L157F	157	157	0.169492	0.00647249	118	309	0	0.538462
M-071	MBC	entg|Cwf19l2,ref|NM_027545	Cwf19l2	chr9	3477907	3477907	+	NM_027545	NM_027545	C	T	0	nonsense	SNM	c.2611C>T	p.Q871*	871	871	0.379562	0	137	300	0	0.857143
M-071	MBC	entg|Hoxb3,ref|NM_001079869,entg|Hoxb3,ref|NM_010458	Hoxb3	chr11	96344586	96344586	+	NM_001079869	NM_001079869	G	C	0	missense	SNM	c.338G>C	p.G113A	113	113	0.216216	0	37	120	0	0.333333
M-071	MBC	entg|Lingo2,entg|Lingo2,ref|NM_001166001,ref|NM_175516,entg|Lingo2,ref|NM_001166000,entg|Lingo2,ref|NM_001165999	Lingo2	chr4	35708741	35708741	-	NM_001166000	NM_001166000	C	T	0	missense	SNM	c.1238G>A	p.R413H	413	413	0.121951	0	82	177	0	1
M-071	MBC	ref|NM_146591,entg|Olfr1101	Olfr1101	chr2	86988550	86988550	-	NM_146591	NM_146591	A	C	0	missense	SNM	c.625T>G	p.L209V	209	209	0.225225	0	111	187	0	0.785714
M-071	MBC	ref|NM_011486,ref|NM_213659,ref|NM_213660,entg|Stat3,entg|Stat3,entg|Stat3	Stat3	chr11	100893701	100893701	-	NM_213659	NM_213659	C	G	0	missense	SNM	c.1852G>C	p.G618R	618	618	0.201681	0	119	248	0	0.6
M-071	MBC	ref|NM_011503,entg|Stxbp2	Stxbp2	chr8	3636516	3636516	+	NM_011503	NM_011503	C	T	0	missense	SNM	c.1049C>T	p.A350V	350	350	0.455056	0	178	470	47	0.653061
M-071	MBC	ref|NM_146153,entg|Thrap3	Thrap3	chr4	126165423	126165427	-	NM_146153	NM_146153	CTTCT	-----	0	frame_shift_del	DEL	c.2825_2829delAGAAG	p.E942fs	942	942	0.122807	0	57	91	34	0.75
M-071	MBC	ref|NM_020625,entg|Zbtb22	Zbtb22	chr17	33917811	33917811	+	NM_020625	NM_020625	C	A	0	missense	SNM	c.929C>A	p.P310Q	310	310	0.166667	0	78	192	0	0.857143
M-074	MBC	entg|Cdr1,ref|NM_001166658	Cdr1	chrX	61184990	61184990	-	NM_001166658	NM_001166658	C	T	0	missense	SNM	c.569G>A	p.R190Q	190	190	1	0	366	1652	255	0.91623
M-074	MBC	entg|Cdr1,ref|NM_001166658	Cdr1	chrX	61185075	61185075	-	NM_001166658	NM_001166658	C	A	0	missense	SNM	c.484G>T	p.D162Y	162	162	0.975369	0.000595948	406	1678	255	0.885714
M-074	MBC	entg|Chl1,ref|NM_007697	Chl1	chr6	103706448	103706448	+	NM_007697	NM_007697	T	A	0	missense	SNM	c.2234T>A	p.L745Q	745	745	0.555556	0	54	114	117	0.764706
M-074	MBC	entg|Cntn6,ref|NM_017383	Cntn6	chr6	104845797	104845797	+	NM_017383	NM_017383	C	A	0	missense	SNM	c.2308C>A	p.P770T	770	770	0.511628	0	86	182	100	0.419355
M-074	MBC	entg|Dusp13,ref|NM_013849,entg|Dusp13,ref|NM_001007268	Dusp13	chr14	21742701	21742701	-	NM_013849	NM_013849	C	T	0	missense	SNM	c.155G>A	p.G52E	52	52	0.445783	0	83	151	71	0.85
M-074	MBC	entg|Il6st,ref|NM_010560	Il6st	chr13	112495189	112495189	+	NM_010560	NM_010560	G	A	0	splice	SNM	c.1262_splice	e9-1	420	420	0.375	0	54	114	49	0.05
M-074	MBC	ref|NM_146826,entg|Olfr969	Olfr969	chr9	39795718	39795718	+	NM_146826	NM_146826	G	A	0	missense	SNM	c.342G>A	p.M114I	114	114	0.441472	0	299	631	53	0.670886
M-074	MBC	ref|NM_026085,entg|Pbld2	Pbld2	chr10	63039186	63039186	+	NM_026085	NM_026085	C	T	0	missense	SNM	c.38C>T	p.A13V	13	13	0.443038	0	158	373	65	0.346154
M-077	MBC	entg|Iscu,ref|NM_025526	Iscu	chr5	113777898	113777898	+	NM_025526	NM_025526	G	T	0	nonsense	SNM	c.487G>T	p.E163*	163	163	0.206349	0.00793651	63	126	0	0.0833333
M-077	MBC	entg|Mll2,ref|NM_001033276	Kmt2d	chr15	98855549	98855549	-	NM_001033276	NM_001033276	G	A	0	missense	SNM	c.5324C>T	p.T1775M	1775	1775	0.33871	0.00431034	124	231	50	0.4
M-077	MBC	ref|NM_010907,entg|Nfkbia	Nfkbia	chr12	55490630	55490630	-	NM_010907	NM_010907	C	T	0	missense	SNM	c.673G>A	p.V225M	225	225	0.107143	0	140	241	0	0.875
M-077	MBC	ref|NM_146762,entg|Olfr1013	Olfr1013	chr2	85770518	85770518	+	NM_146762	NM_146762	C	A	0	missense	SNM	c.716C>A	p.T239N	239	239	0.0736196	0	163	228	0	1
M-077	MBC	ref|NM_027644,entg|Prss41	Prss41	chr17	23844099	23844101	-	NM_027644	NM_027644	CAG	---	0	in_frame_del	DEL	c.37_39delCTG	p.L13del	13	13	0.0568182	0	88	214	34	0.666667
M-077	MBC	ref|NM_001111026,entg|Runx1t1,ref|NM_001111027,entg|Runx1t1,ref|NM_009822,entg|Runx1t1	Runx1t1	chr4	13865891	13865891	+	NM_001111027	NM_001111027	C	T	0	nonsense	SNM	c.1138C>T	p.R380*	380	380	0.102564	0	156	291	0	0.777778
M-077	MBC	ref|NM_177086,entg|Zmat4	Zmat4	chr8	23929182	23929182	+	NM_177086	NM_177086	T	C	0	missense	SNM	c.436T>C	p.Y146H	146	146	0.236111	0	72	127	0	0.888889
M-094	MBC	entg|4933416I08Rik,ref|NM_027700	4933416I08Rik	chrX	53686697	53686697	+	NM_027700	NM_027700	T	C	0	missense	SNM	c.61T>C	p.W21R	21	21	0.538462	0	39	347	1	0.615385
M-094	MBC	entg|5730455P16Rik,ref|NM_027472	5730455P16Rik	chr11	80370360	80370360	-	NM_027472	NM_027472	G	A	0	nonsense	SNM	c.640C>T	p.Q214*	214	214	0.368421	0	57	242	1	0.75
M-094	MBC	entg|Abca16,ref|NR_024051	Abca16	chr7	120540122	120540122	+	NM_001278943	NM_001278943	A	G	0	missense	SNM	c.3323A>G	p.E1108G	1108	1108	0.119048	0	42	322	1	0.666667
M-094	MBC	entg|Ampd1,ref|NM_001033303	Ampd1	chr3	103091282	103091282	+	NM_001033303	NM_001033303	G	T	0	missense	SNM	c.1030G>T	p.A344S	344	344	0.135338	0	133	304	1	0.636364
M-094	MBC	entg|Cacna1h,entg|Cacna1h,ref|NM_001163691,ref|NM_021415	Cacna1h	chr17	25393806	25393806	-	NM_021415	NM_021415	G	A	0	missense	SNM	c.1042C>T	p.R348C	348	348	0.0617978	0	356	199	1	0.571429
M-094	MBC	entg|Eri1,ref|NM_026067	Eri1	chr8	35491379	35491379	-	NM_026067	NM_026067	T	C	0	missense	SNM	c.97A>G	p.K33E	33	33	0.10101	0.00840336	99	357	1	0.666667
M-094	MBC	entg|Fbxw8,ref|NM_172721	Fbxw8	chr5	118155329	118155329	-	NM_172721	NM_172721	G	A	0	missense	SNM	c.53C>T	p.A18V	18	18	0.40678	0	59	33	1	0.6
M-094	MBC	entg|Gm10436,ref|NM_001105254	Gm10436	chr12	88177558	88177558	-	NM_001105254	NM_001105254	T	C	0	missense	SNM	c.508A>G	p.T170A	170	170	0.541176	0	85	512	1	0.642857
M-094	MBC	gb|AK049619,gb|BC172015,gb|EF651799,gb|EF651802,gb|EF651833,gb|EF651816,gb|CT010181,gb|EF651811,gb|EF651815,gb|EF651823,ens|ENSMUST00000163790	Gm3558	chr14	7549840	7549840	-	NM_001270842	NM_001270842	G	C	0	missense	SNM	c.559C>G	p.L187V	187	187	0.0580645	0.00131752	154	759	1	0.8
M-094	MBC	entg|Gm5458,ref|NM_001024706	Gm5458	chr14	19599650	19599650	-	NM_001024706	NM_001024706	C	G	0	missense	SNM	c.505G>C	p.V169L	169	169	0.0522388	0	134	895	1	0.75
M-094	MBC	entg|Hspb2,entg|Hspb2,ref|NM_001164708,ref|NM_024441	Hspb2	chr9	50751736	50751742	-	NM_024441	NM_024441	GGTTGGG	-------	0	splice	DEL	c.95_splice	e3-3_-9	31	31	0.280992	0	121	72	1	0.133333
M-094	MBC	entg|Il6st,ref|NM_010560	Il6st	chr13	112501161	112501161	+	NM_010560	NM_010560	T	A	0	missense	SNM	c.1883T>A	p.L628H	628	628	0.206897	0	58	299	1	0.333333
M-094	MBC	ref|NM_146568,entg|Olfr1012	Olfr1012	chr2	85759861	85759861	-	NM_146568	NM_146568	C	T	0	missense	SNM	c.514G>A	p.V172I	172	172	0.0641026	0	78	203	1	0.666667
M-094	MBC	ref|NM_146320,entg|Olfr1145	Olfr1145	chr2	87810072	87810072	+	NM_146320	NM_146320	C	T	0	missense	SNM	c.251C>T	p.S84F	84	84	0.0851064	0	188	248	1	0.6
M-094	MBC	ref|NM_146320,entg|Olfr1145	Olfr1145	chr2	87810092	87810092	+	NM_146320	NM_146320	G	A	0	missense	SNM	c.271G>A	p.V91I	91	91	0.0612245	0	196	259	1	0.714286
M-094	MBC	ref|NM_001011842,entg|Olfr1474	Olfr1474	chr19	13471231	13471231	+	NM_001011842	NM_001011842	G	A	0	missense	SNM	c.260G>A	p.S87N	87	87	0.0461538	0	195	608	1	0.8
M-094	MBC	ref|NM_001011842,entg|Olfr1474	Olfr1474	chr19	13471237	13471237	+	NM_001011842	NM_001011842	C	T	0	missense	SNM	c.266C>T	p.T89I	89	89	0.046875	0	192	613	1	0.8
M-094	MBC	ref|NM_146633,entg|Olfr1501	Olfr1501	chr19	13838420	13838420	-	NM_146633	NM_146633	A	C	0	missense	SNM	c.752T>G	p.F251C	251	251	0.392157	0	51	255	1	0.666667
M-094	MBC	ref|NM_206823,entg|Olfr153	Olfr153	chr2	87532756	87532756	+	NM_206823	NM_206823	C	T	0	missense	SNM	c.722C>T	p.T241I	241	241	0.46	0	100	482	1	0.84
M-094	MBC	ref|NM_001079849,entg|Paip1,ref|NM_145457,entg|Paip1	Paip1	chr13	119456987	119456987	+	NM_145457	NM_145457	G	C	0	splice	SNM	c.1110_splice	e11-1	370	370	0.0875	0	80	207	1	0.75
M-094	MBC	ref|NM_011220,entg|Pts	Pts	chr9	50528620	50528620	-	NM_011220	NM_011220	T	C	1	missense	SNM	c.17A>G	p.D6G	6	6	0.5	0	26	27	1	0.444444
M-094	MBC	ref|NM_001045513,entg|Raph1	Raph1	chr1	60499491	60499491	-	NM_001045513	NM_001045513	C	T	0	missense	SNM	c.1294G>A	p.G432R	432	432	0.514286	0	35	275	1	0.636364
M-094	MBC	ref|NM_172564,entg|Tns4	Tns4	chr11	99085865	99085865	-	NM_172564	NM_172564	G	A	0	nonsense	SNM	c.229C>T	p.Q77*	77	77	0.42029	0	69	89	1	0.45
M-094	MBC	ref|NM_001009573,entg|Unc13d	Unc13d	chr11	116062763	116062763	-	NM_001009573	NM_001009573	A	T	0	missense	SNM	c.3183T>A	p.D1061E	1061	1061	0.4625	0	80	74	1	0.321429
M-094	MBC	ref|NM_206869,entg|Vmn1r180	Vmn1r180	chr7	23952622	23952622	+	NM_206869	NM_206869	C	T	0	missense	SNM	c.209C>T	p.T70I	70	70	0.0491803	0.00175747	183	569	1	0.8
M-094	MBC	ref|NM_206869,entg|Vmn1r180	Vmn1r180	chr7	23952628	23952628	+	NM_206869	NM_206869	A	C	0	missense	SNM	c.215A>C	p.Q72P	72	72	0.0572917	0	192	589	1	0.571429
M-094	MBC	ref|NM_207546,entg|Vmn1r181	Vmn1r181	chr7	23984779	23984779	+	NM_207546	NM_207546	T	C	0	missense	SNM	c.668T>C	p.L223P	223	223	0.0456621	0	219	837	1	0.428571
M-094	MBC	ref|NM_175638,entg|Wnk4	Wnk4	chr11	101261252	101261252	+	NM_175638	NM_175638	C	T	0	missense	SNM	c.581C>T	p.T194M	194	194	0.517915	0	307	193	1	0.65625
M-098	MBC	entg|Bbs10,ref|NM_027914	Bbs10	chr10	111300247	111300247	+	NM_027914	NM_027914	A	G	0	missense	SNM	c.1220A>G	p.H407R	407	407	0.577982	0	109	177	1	0.909091
M-098	MBC	entg|Dab2ip,ref|NM_001114125,entg|Dab2ip,ref|NM_001114124,entg|Dab2ip,ref|NM_001001602	Dab2ip	chr2	35712876	35712876	+	NM_001114124	NM_001114124	C	T	0	missense	SNM	c.1181C>T	p.T394I	394	394	0.261364	0	88	226	1	0.916667
M-098	MBC	entg|Med12,ref|NM_021521	Med12	chrX	101274306	101274306	+	NM_021521	NM_021521	C	T	0	missense	SNM	c.46C>T	p.R16W	16	16	0.229167	0	48	129	1	0.833333
M-098	MBC	ref|NM_001033431,entg|Nlrp12	Nlrp12	chr7	3222537	3222537	-	NM_001033431	NM_001033431	T	C	1	missense	SNM	c.3101A>G	p.K1034R	1034	1034	0.539568	0	139	268	1	0.315789
M-098	MBC	ref|NM_001001445,entg|Trpv1	Trpv1	chr11	73244209	73244209	+	NM_001001445	NM_001001445	C	T	0	missense	SNM	c.1231C>T	p.H411Y	411	411	0.35	0	20	47	1	0.166667
M-098	MBC	ref|NM_001009573,entg|Unc13d	Unc13d	chr11	116062763	116062763	-	NM_001009573	NM_001009573	A	T	0	missense	SNM	c.3183T>A	p.D1061E	1061	1061	0.4	0	30	74	1	0.2
M-099	MBC	entg|Acot1,ref|NM_012006	Acot1	chr12	84017206	84017206	+	NM_012006	NM_012006	C	T	0	missense	SNM	c.1087C>T	p.P363S	363	363	0.4	0	45	129	1	0.384615
M-099	MBC	entg|Adamts20,ref|NM_177431,entg|Adamts20,ref|NM_001164785,entg|Adamts20,ref|NM_001164786	Adamts20	chr15	94351598	94351598	-	NM_001164786	NM_001164786	T	-	0	frame_shift_del	DEL	c.1537delA	p.T513fs	513	513	0.307692	0.00934579	39	107	1	0.333333
M-099	MBC	entg|Arl14,ref|NM_027843	Arl14	chr3	69222924	69222924	+	NM_027843	NM_027843	G	C	0	missense	SNM	c.403G>C	p.E135Q	135	135	0.368421	0	151	250	1	0.866667
M-099	MBC	entg|Astn2,entg|Astn2,ref|NM_019514,ref|NM_207109	Astn2	chr4	65950229	65950229	-	NM_207109	NM_207109	G	T	0	missense	SNM	c.1528C>A	p.L510M	510	510	0.395833	0	48	163	1	0.266667
M-099	MBC	entg|Cts7,ref|NM_019539	Cts7	chr13	61355650	61355650	-	NM_019539	NM_019539	A	G	0	missense	SNM	c.499T>C	p.C167R	167	167	0.475	0	80	239	1	0.652174
M-099	MBC	entg|Lbx1,ref|NM_010691	Lbx1	chr19	45235073	45235073	-	NM_010691	NM_010691	G	A	0	missense	SNM	c.155C>T	p.S52L	52	52	0.314286	0	35	48	1	0.375
M-099	MBC	entg|Lrriq4,ref|NM_026668	Lrriq4	chr3	30672207	30672207	+	NM_026668	NM_026668	G	T	0	missense	SNM	c.1705G>T	p.A569S	569	569	0.509434	0	53	204	1	0.35
M-099	MBC	ref|NM_001024927,ref|NM_001081641,entg|Pitpnm3,entg|Pitpnm3	Pitpnm3	chr11	72063181	72063181	-	NM_001024927	NM_001024927	T	A	0	missense	SNM	c.1687A>T	p.T563S	563	563	0.333333	0	54	142	1	0.8
M-099	MBC	ref|NM_013631,entg|Pklr,ref|NM_001099779,entg|Pklr	Pklr	chr3	89143244	89143244	+	NM_013631	NM_013631	G	T	0	missense	SNM	c.1304G>T	p.R435L	435	435	0.423077	0	52	103	1	1
M-099	MBC	ref|NM_008984,entg|Ptprm	Ptprm	chr17	66920289	66920289	-	NM_008984	NM_008984	G	T	0	missense	SNM	c.1864C>A	p.Q622K	622	622	0.169492	0	59	177	1	0.428571
M-099	MBC	ref|NM_022025,entg|Slc5a7	Slc5a7	chr17	54287416	54287416	-	NM_022025	NM_022025	C	T	0	missense	SNM	c.536G>A	p.G179D	179	179	0.493333	0	75	191	1	0.0571429
M-099	MBC	ref|NM_011486,ref|NM_213659,ref|NM_213660,entg|Stat3,entg|Stat3,entg|Stat3	Stat3	chr11	100893711	100893711	-	NM_213659	NM_213659	G	T	0	missense	SNM	c.1842C>A	p.S614R	614	614	0.422535	0	142	241	1	0.875
M-099	MBC	ref|NM_173393,entg|Xkr6	Xkr6	chr14	63819492	63819492	+	NM_173393	NM_173393	C	A	0	missense	SNM	c.1619C>A	p.P540H	540	540	0.40625	0	32	114	1	0.625
M-099	MBC	ref|NM_001177901,entg|Zfp513,ref|NM_175311,entg|Zfp513	Zfp513	chr5	31200295	31200295	-	NM_175311	NM_175311	G	A	0	nonsense	SNM	c.739C>T	p.R247*	247	247	0.406977	0	86	294	1	0.944444
M-108	MBC	entg|Adcy5,ref|NM_001012765	Adcy5	chr16	35291544	35291544	+	NM_001012765	NM_001012765	G	A	0	missense	SNM	c.2770G>A	p.V924M	924	924	0.629371	0	143	119	255	0.666667
M-108	MBC	entg|Lphn1,ref|NM_181039	Adgrl1	chr8	83932538	83932538	+	NM_181039	NM_181039	C	T	0	missense	SNM	c.1870C>T	p.R624W	624	624	0.440678	0	59	161	44	0.857143
M-108	MBC	entg|Cyp2j12,ref|NM_001100182	Cyp2j12	chr4	96122523	96122523	-	NM_001100182	NM_001100182	C	T	0	missense	SNM	c.514G>A	p.E172K	172	172	0.416667	0	96	244	44	0.6
M-108	MBC	entg|Fyb,ref|NM_011815	Fyb	chr15	6580489	6580489	+	NM_011815	NM_011815	C	T	0	missense	SNM	c.542C>T	p.A181V	181	181	0.287671	0	73	248	0	0.615385
M-108	MBC	entg|Gucy1b3,entg|Gucy1b3,ref|NM_001161796,ref|NM_017469	Gucy1b3	chr3	82037963	82037963	-	NM_017469	NM_017469	C	T	0	missense	SNM	c.1367G>A	p.R456Q	456	456	0.465649	0	131	254	66	0.525
M-108	MBC	entg|Mapk10,entg|Mapk10,ref|NM_001081567,ref|NM_009158	Mapk10	chr5	102926099	102926099	-	NM_001081567	NM_001081567	C	T	0	missense	SNM	c.1225G>A	p.V409I	409	409	0.421053	0	209	489	42	0.142857
M-108	MBC	ref|NM_001011836,entg|Olfr1129	Olfr1129	chr2	87575392	87575392	+	NM_001011836	NM_001011836	T	C	0	missense	SNM	c.307T>C	p.C103R	103	103	0.419672	0	305	579	35	0.684211
M-108	MBC	ref|NM_001014288,entg|Ptprd,ref|NM_011211,entg|Ptprd	Ptprd	chr4	76128496	76128496	-	NM_011211	NM_011211	G	C	0	missense	SNM	c.1553C>G	p.T518S	518	518	0.395349	0	43	100	53	0.0625
M-108	MBC	ref|NM_016926,entg|Sart3	Sart3	chr5	113743205	113743205	-	NM_016926	NM_016926	G	A	0	missense	SNM	c.2813C>T	p.A938V	938	938	0.428571	0	56	211	65	0.142857
M-108	MBC	ref|NM_021301,entg|Slc15a2,ref|NM_001145899,entg|Slc15a2	Slc15a2	chr16	36772445	36772445	-	NM_021301	NM_021301	A	G	1	missense	SNM	c.629T>C	p.M210T	210	210	0.628571	0	210	291	255	0.970149
M-309	MBC	entg|Adamts9,ref|NM_175314	Adamts9	chr6	92890196	92890196	-	NM_175314	NM_175314	C	G	0	missense	SNM	c.208G>C	p.E70Q	70	70	0.154472	0	123	277	0	0.9
M-309	MBC	entg|Ankk1,ref|NM_172922	Ankk1	chr9	49418716	49418716	-	NM_172922	NM_172922	C	T	0	missense	SNM	c.938G>A	p.C313Y	313	313	0.103175	0	126	264	0	0.857143
M-309	MBC	entg|Ano2,ref|NM_153589	Ano2	chr6	125793600	125793600	+	NM_153589	NM_153589	C	T	0	missense	SNM	c.829C>T	p.R277W	277	277	0.123288	0	73	137	0	0.5
M-309	MBC	entg|Brsk1,ref|NM_001003920,ref|NM_177887,entg|Tmem150b	Brsk1	chr7	4707399	4707399	+	NM_001003920	NM_001003920	T	C	0	missense	SNM	c.1631T>C	p.V544A	544	544	0.163265	0	49	101	0	0.6
M-309	MBC	entg|Cdh7,ref|NM_172853	Cdh7	chr1	110098333	110098333	+	NM_172853	NM_172853	T	C	0	missense	SNM	c.1298T>C	p.V433A	433	433	0.15	0	60	135	0	0.8
M-309	MBC	entg|Cep120,ref|NM_178686	Cep120	chr18	53709074	53709074	-	NM_178686	NM_178686	C	T	0	missense	SNM	c.2188G>A	p.A730T	730	730	0.0825688	0	109	196	0	0.8
M-309	MBC	entg|Cyp3a11,ref|NM_007818	Cyp3a11	chr5	145860447	145860447	-	NM_007818	NM_007818	A	G	0	missense	SNM	c.1121T>C	p.L374P	374	374	0.114478	0	297	512	0	0.619048
M-309	MBC	entg|Dab1,ref|NM_010014,entg|Dab1,ref|NM_177259	Dab1	chr4	104605406	104605406	+	NM_177259	NM_177259	A	T	0	missense	SNM	c.176A>T	p.K59M	59	59	0.0857143	0	105	229	0	0.5
M-309	MBC	entg|Fcgbp,ref|NM_001122603	Fcgbp	chr7	28103866	28103866	+	NM_001122603	NM_001122603	G	A	0	missense	SNM	c.4894G>A	p.E1632K	1632	1632	0.219697	0	132	226	0	0.318182
M-309	MBC	entg|Gm12695,ref|NM_001081284	Gm12695	chr4	96762017	96762017	-	NM_001081284	NM_001081284	T	A	0	missense	SNM	c.591A>T	p.K197N	197	197	0.183824	0	136	242	0	0.470588
M-309	MBC	entg|Mllt4,ref|NM_010806	Mllt4	chr17	13822308	13822308	+	NM_010806	NM_010806	G	T	0	missense	SNM	c.940G>T	p.A314S	314	314	0.12605	0	119	250	0	0.875
M-309	MBC	entg|Msi1,ref|NM_008629	Msi1	chr5	115450835	115450835	+	NM_008629	NM_008629	G	A	0	missense	SNM	c.908G>A	p.R303H	303	303	0.242424	0	33	57	29	0.142857
M-309	MBC	entg|Myo7a,ref|NM_008663	Myo7a	chr7	98071036	98071036	-	NM_001256081	NM_001256081	C	T	0	missense	SNM	c.4018G>A	p.A1340T	1340	1340	0.227723	0	101	156	0	0.916667
M-309	MBC	ref|NM_146924,entg|Olfr476	Olfr476	chr7	107967889	107967889	+	NM_146924	NM_146924	C	T	1	missense	SNM	c.491C>T	p.S164L	164	164	0.102473	0	283	505	0	0.611111
M-309	MBC	ref|NM_146906,entg|Olfr853	Olfr853	chr9	19537627	19537627	-	NM_146906	NM_146906	A	C	0	missense	SNM	c.302T>G	p.L101R	101	101	0.115	0	200	349	0	0.916667
M-309	MBC	ref|NM_001174154,entg|Pcdha4-g,ref|NM_053127,entg|Pcdhb2	Pcdhb2	chr18	37295730	37295730	+	NM_053127	NM_053127	A	G	0	missense	SNM	c.755A>G	p.Q252R	252	252	0.165354	0	127	245	0	0.615385
M-309	MBC	ref|NM_008842,entg|Pim1	Pim1	chr17	29491425	29491425	+	NM_008842	NM_008842	C	G	0	missense	SNM	c.183C>G	p.N61K	61	61	0.128205	0	117	190	0	0.875
M-309	MBC	ref|NM_001163554,ref|NM_001163555,ref|NM_001163556,ref|NM_011138,entg|Pou2f2,entg|Pou2f2,entg|Pou2f2,entg|Pou2f2	Pou2f2	chr7	25132423	25132423	-	NM_001163554	NM_001163554	A	T	0	splice	SNM	c.28_splice	e2+2	9	9	0.0833333	0	156	244	0	0.857143
M-309	MBC	ref|NM_133705,entg|Pycr2	Pycr2	chr1	180904770	180904770	+	NM_133705	NM_133705	G	A	0	missense	SNM	c.94G>A	p.A32T	32	32	0.174825	0	143	253	0	0.470588
M-309	MBC	ens|ENSMUST00000166451,gb|AK141316,ens|ENSMUST00000100731,ens|ENSMUST00000056053	Setd1b	chr5	123148318	123148330	+	NM_001040398	NM_001040398	CTGGAGTCCTCTC	-------------	0	frame_shift_del	DEL	c.1426_1438delCTGGAGTCCTCTC	p.L476fs	476	476	0.285714	0	49	70	69	0.4
M-309	MBC	ref|NM_019507,entg|Tbx21	Tbx21	chr11	97114654	97114657	-	NM_019507	NM_019507	CTTG	----	0	frame_shift_del	DEL	c.481_484delCAAG	p.Q161fs	161	161	0.105882	0	85	167	50	0.8
M-309	MBC	ref|NM_001105187,entg|Vmn2r74	Vmn2r74	chr7	85952403	85952403	-	NM_001105187	NM_001105187	C	T	0	missense	SNM	c.2026G>A	p.A676T	676	676	0.127946	0	297	510	0	0.583333
M-309	MBC	ref|NR_029428,entg|Wdr13,ref|NM_026137,entg|Wdr13	Wdr13	chrX	8125622	8125622	-	NM_026137	NM_026137	A	C	0	missense	SNM	c.1381T>G	p.F461V	461	461	0.305556	0	36	134	0	0.375
M-373	MBC	entg|Cyp3a11,ref|NM_007818	Cyp3a11	chr5	145860372	145860372	-	NM_007818	NM_007818	G	T	0	missense	SNM	c.1196C>A	p.S399Y	399	399	0.108696	0	276	474	0	0.875
M-373	MBC	entg|Kcnd1,ref|NM_008423	Kcnd1	chrX	7836355	7836355	+	NM_008423	NM_008423	C	-	0	frame_shift_del	DEL	c.1808delC	p.T603fs	603	603	0.0943396	0	106	226	59	1
M-373	MBC	ref|NM_080464,entg|Ppp1r3a	Ppp1r3a	chr6	14755159	14755159	-	NM_080464	NM_080464	C	A	0	nonsense	SNM	c.88G>T	p.E30*	30	30	0.0833333	0	120	198	0	0.666667
M-373	MBC	ref|NM_009027,entg|Rasgrf2	Rasgrf2	chr13	91884527	91884527	-	NM_009027	NM_009027	G	A	0	splice	SNM	c.1726_splice	e16-3	575	575	0.258065	0.0204082	31	49	32	0
M-373	MBC	ref|NM_001113352,ref|NM_001113353,entg|Synj2,entg|Synj2,ref|NM_001113351,ref|NM_011523,entg|Synj2,entg|Synj2	Synj2	chr17	6019405	6019405	+	NM_001113353	NM_001113353	C	T	0	missense	SNM	c.2060C>T	p.T687M	687	687	0.0873786	0.00555556	103	179	0	0.8
M-373	MBC	ref|NM_001105187,entg|Vmn2r74	Vmn2r74	chr7	85957091	85957091	-	NM_001105187	NM_001105187	T	G	0	missense	SNM	c.1046A>C	p.K349T	349	349	0.0706522	0	184	370	0	0.444444
M-373	MBC	ref|NM_001159693,entg|Zar1l	Zar1l	chr5	150507136	150507136	-	NM_001159693	NM_001159693	C	T	0	missense	SNM	c.809G>A	p.R270H	270	270	0.0577778	0	225	387	0	0.444444
M-561	MBC	ens|ENSMUST00000094615	5830473C10Rik	chr5	90577864	90577864	+	NM_001252661	NM_001252661	C	T	0	missense	SNM	c.934C>T	p.R312C	312	312	0.432432	0	74	194	47	1
M-561	MBC	entg|Alg14,ref|NM_024178	Alg14	chr3	121298739	121298739	+	NM_024178	NM_024178	A	G	0	missense	SNM	c.272A>G	p.Q91R	91	91	0.352273	0	88	181	0	0.347826
M-561	MBC	entg|Etl4,ref|NM_001081006,entg|Etl4,entg|Etl4,ref|NM_029895,ref|NM_178059,entg|Etl4,entg|Etl4,ref|NM_001177630,ref|NM_001177631	Etl4	chr2	20806603	20806603	+	NM_001081006	NM_001081006	G	T	0	nonsense	SNM	c.4600G>T	p.E1534*	1534	1534	0.508929	0	112	205	74	0.5
M-561	MBC	entg|Fbxl16,ref|NM_001164225	Fbxl16	chr17	25818578	25818578	+	NM_001164225	NM_001164225	G	T	0	missense	SNM	c.1223G>T	p.C408F	408	408	0.411765	0.00414938	119	240	30	0.0425532
M-561	MBC	entg|Foxred1,ref|NM_172291	Foxred1	chr9	35205119	35205119	-	NM_172291	NM_172291	T	C	0	missense	SNM	c.1232A>G	p.Q411R	411	411	0.423729	0	118	225	35	0.612903
M-561	MBC	entg|Ggn,ref|NM_182694,entg|Ggn,ref|NM_182696	Ggn	chr7	29173836	29173836	+	NM_182694	NM_182694	T	C	0	missense	SNM	c.2093T>C	p.L698P	698	698	0.426829	0	82	159	43	0.944444
M-561	MBC	entg|Mll2,ref|NM_001033276	Kmt2d	chr15	98855549	98855549	-	NM_001033276	NM_001033276	G	A	0	missense	SNM	c.5324C>T	p.T1775M	1775	1775	0.670886	0.00431034	158	231	255	0.65625
M-561	MBC	entg|Lgr6,ref|NM_001033409	Lgr6	chr1	134994010	134994010	-	NM_001033409	NM_001033409	C	T	0	missense	SNM	c.1426G>A	p.A476T	476	476	0.5625	0	48	95	255	0.588235
M-561	MBC	entg|Myc,entg|Myc,entg|Myc,entg|Myc,ref|NM_001177352,ref|NM_001177353,ref|NM_001177354,ref|NM_010849	Myc	chr15	61987819	61987819	+	NM_001177354	NM_001177354	C	G	0	missense	SNM	c.298C>G	p.L100V	100	100	0.534031	0	191	186	255	0.378378
M-561	MBC	ref|NM_001081278,entg|Tbc1d4	Tbc1d4	chr14	101452423	101452423	-	NM_001081278	NM_001081278	A	C	0	missense	SNM	c.3146T>G	p.V1049G	1049	1049	0.443182	0.00502513	88	199	48	0.95
