# Supplementary material for: Distinct Genetically Determined Origins of Myd88 / BCL2 -Driven Aggressive Lymphoma Rationalize Targeted Therapeutic Intervention Strategies
Source: Oxford University Press journal article supplement (doi:10.1158/2643-3230.bcd-22-0007), 2022-11-07
Supplement: bcd-22-0007_table_s5_suppst5.xlsx [file bcd-22-0007_table_s5_suppst5.xlsx]

## Sheet: KEGG_PPMBC-vs-MBC
pathway	pval	padj	log2err	ES	NES	size
hsa00010_Glycolysis_/_Gluconeogenesis	0.934236	0.947894	0.0472587	-0.198205	-0.737669	61
hsa00020_Citrate_cycle_(TCA_cycle)	0.0764706	0.130716	0.227987	-0.42905	-1.37295	29
hsa00030_Pentose_phosphate_pathway	0.885947	0.914951	0.052057	0.231353	0.747089	30
hsa00040_Pentose_and_glucuronate_interconversions	0.508	0.587661	0.0782955	-0.348346	-0.969513	17
hsa00051_Fructose_and_mannose_metabolism	0.723529	0.770137	0.0597318	-0.255265	-0.849597	35
hsa00052_Galactose_metabolism	0.305284	0.407436	0.106323	-0.339956	-1.0945	30
hsa00053_Ascorbate_and_aldarate_metabolism	0.222868	0.323579	0.126876	-0.531327	-1.23795	9
hsa00061_Fatty_acid_biosynthesis	0.194118	0.286633	0.138022	-0.446107	-1.22895	16
hsa00062_Fatty_acid_elongation	0.15415	0.241903	0.157403	-0.406983	-1.24443	25
hsa00071_Fatty_acid_degradation	0.140594	0.222768	0.165657	-0.361958	-1.24107	40
hsa00100_Steroid_biosynthesis	0.556	0.628527	0.0736213	0.321868	0.928282	19
hsa00120_Primary_bile_acid_biosynthesis	0.930057	0.946647	0.0464155	-0.244784	-0.61692	11
hsa00130_Ubiquinone_and_other_terpenoid-quinone_biosynthesis	0.0387521	0.0738846	0.321776	-0.658877	-1.53513	9
hsa00140_Steroid_hormone_biosynthesis	0.927419	0.946647	0.0494905	0.227034	0.661993	20
hsa00190_Oxidative_phosphorylation	0.000198953	0.000775692	0.518848	-0.426866	-1.76322	116
hsa00220_Arginine_biosynthesis	0.286282	0.389568	0.111463	-0.405856	-1.14927	18
hsa00230_Purine_metabolism	0.180451	0.27053	0.140406	-0.276512	-1.13944	114
hsa00232_Caffeine_metabolism	1	1	0.0463228	-0.277756	-0.415852	2
hsa00240_Pyrimidine_metabolism	0.000778678	0.00254907	0.477271	-0.511552	-1.83658	49
hsa00250_Alanine,_aspartate_and_glutamate_metabolism	0.0680051	0.119181	0.287805	-0.450296	-1.46108	32
hsa00260_Glycine,_serine_and_threonine_metabolism	0.0139385	0.0320309	0.38073	-0.48904	-1.62767	35
hsa00270_Cysteine_and_methionine_metabolism	0.106	0.172685	0.193813	-0.35742	-1.27346	47
hsa00280_Valine,_leucine_and_isoleucine_degradation	0.0808081	0.137453	0.224966	-0.36575	-1.31312	49
hsa00290_Valine,_leucine_and_isoleucine_biosynthesis	0.786116	0.824116	0.0537873	0.436254	0.729933	3
hsa00310_Lysine_degradation	0.829365	0.866836	0.0538979	-0.223697	-0.824178	58
hsa00330_Arginine_and_proline_metabolism	0.058	0.10428	0.266351	-0.383631	-1.36685	47
hsa00340_Histidine_metabolism	0.517787	0.59494	0.0766747	-0.33117	-0.962747	20
hsa00350_Tyrosine_metabolism	0.561508	0.628527	0.0727141	0.305999	0.925376	22
hsa00360_Phenylalanine_metabolism	0.679592	0.734637	0.0646485	0.330292	0.851841	13
hsa00380_Tryptophan_metabolism	0.159363	0.247977	0.155242	0.36505	1.22791	37
hsa00400_Phenylalanine,_tyrosine_and_tryptophan_biosynthesis	0.324165	0.420142	0.102822	0.634994	1.16276	4
hsa00410_beta-Alanine_metabolism	0.0274881	0.0549285	0.352488	-0.500834	-1.57706	28
hsa00430_Taurine_and_hypotaurine_metabolism	0.980952	0.992392	0.0443293	-0.207189	-0.528302	12
hsa00440_Phosphonate_and_phosphinate_metabolism	0.77439	0.816758	0.0582216	0.371168	0.762659	6
hsa00450_Selenocompound_metabolism	0.418	0.505387	0.0888945	-0.371539	-1.03406	17
hsa00470_D-Amino_acid_metabolism	0.219608	0.320505	0.128789	-0.625701	-1.2851	6
hsa00480_Glutathione_metabolism	0.356031	0.449247	0.096563	-0.286151	-1.05497	55
hsa00500_Starch_and_sucrose_metabolism	0.387476	0.480193	0.0919686	-0.346611	-1.05336	24
hsa00510_N-Glycan_biosynthesis	2.3897e-07	1.38204e-06	0.674963	-0.647985	-2.28378	45
hsa00511_Other_glycan_degradation	0.17451	0.265592	0.146416	-0.455467	-1.25474	16
hsa00512_Mucin_type_O-glycan_biosynthesis	0.985772	0.994369	0.04707	0.172959	0.557353	29
hsa00513_Various_types_of_N-glycan_biosynthesis	4.16033e-05	0.000185081	0.557332	-0.637749	-2.11563	34
hsa00514_Other_types_of_O-glycan_biosynthesis	0.0752437	0.129776	0.287805	-0.418535	-1.45132	41
hsa00515_Mannose_type_O-glycan_biosynthesis	0.000572442	0.00198637	0.477271	-0.67666	-1.96712	20
hsa00520_Amino_sugar_and_nucleotide_sugar_metabolism	0.238281	0.341668	0.122679	0.311959	1.13351	51
hsa00524_Neomycin,_kanamycin_and_gentamicin_biosynthesis	0.333988	0.430832	0.100991	0.631096	1.15562	4
hsa00531_Glycosaminoglycan_degradation	0.262	0.363656	0.117766	-0.417432	-1.16179	17
hsa00532_Glycosaminoglycan_biosynthesis	0.780632	0.820847	0.05653	-0.271169	-0.788318	20
hsa00533_Glycosaminoglycan_biosynthesis	0.0488281	0.091765	0.287857	-0.568507	-1.46841	13
hsa00534_Glycosaminoglycan_biosynthesis	0.126506	0.201365	0.176694	-0.443432	-1.31307	22
hsa00561_Glycerolipid_metabolism	0.175439	0.265839	0.145516	-0.326638	-1.20482	57
hsa00562_Inositol_phosphate_metabolism	0.0188139	0.0421188	0.352488	0.373315	1.43654	68
hsa00563_Glycosylphosphatidylinositol_(GPI)-anchor_biosynthesis	0.00231244	0.00631824	0.431708	-0.602776	-1.8431	25
hsa00564_Glycerophospholipid_metabolism	0.481707	0.568546	0.0819779	0.246351	0.987082	84
hsa00565_Ether_lipid_metabolism	0.0296532	0.0578071	0.352488	0.433006	1.45649	37
hsa00590_Arachidonic_acid_metabolism	0.320312	0.420142	0.103197	0.30749	1.08156	45
hsa00591_Linoleic_acid_metabolism	0.650728	0.705907	0.067676	0.322356	0.873068	15
hsa00592_alpha-Linolenic_acid_metabolism	0.721116	0.76993	0.0606404	0.287872	0.810177	17
hsa00600_Sphingolipid_metabolism	0.064257	0.113184	0.252961	-0.376371	-1.33876	46
hsa00601_Glycosphingolipid_biosynthesis	0.2249	0.325167	0.128789	-0.398057	-1.17871	22
hsa00603_Glycosphingolipid_biosynthesis	0.0549115	0.0997607	0.321776	-0.608272	-1.57112	13
hsa00604_Glycosphingolipid_biosynthesis	0.405769	0.495781	0.0883594	-0.387636	-1.03621	14
hsa00620_Pyruvate_metabolism	0.0182196	0.0412016	0.352488	-0.457319	-1.56804	40
hsa00630_Glyoxylate_and_dicarboxylate_metabolism	0.557087	0.628527	0.0727141	-0.298096	-0.931922	27
hsa00640_Propanoate_metabolism	0.00823027	0.0198327	0.38073	-0.524608	-1.68899	30
hsa00650_Butanoate_metabolism	0.0229142	0.0479996	0.352488	-0.553212	-1.60824	20
hsa00670_One_carbon_pool_by_folate	0.250497	0.354786	0.120433	-0.417726	-1.18288	18
hsa00730_Thiamine_metabolism	0.296786	0.397625	0.10592	-0.445789	-1.12351	11
hsa00740_Riboflavin_metabolism	0.292	0.395179	0.110565	0.517218	1.1692	8
hsa00750_Vitamin_B6_metabolism	0.352941	0.446973	0.0975449	-0.544485	-1.11829	6
hsa00760_Nicotinate_and_nicotinamide_metabolism	0.11609	0.187363	0.186433	0.401448	1.30639	32
hsa00770_Pantothenate_and_CoA_biosynthesis	0.0755467	0.129776	0.231127	-0.49874	-1.41229	18
hsa00780_Biotin_metabolism	0.763326	0.807543	0.0611693	-0.469361	-0.774936	3
hsa00785_Lipoic_acid_metabolism	0.117271	0.188393	0.190023	-0.798782	-1.31883	3
hsa00790_Folate_biosynthesis	0.68357	0.736642	0.0640704	-0.292543	-0.855702	21
hsa00830_Retinol_metabolism	0.253937	0.358196	0.118815	-0.366832	-1.14681	27
hsa00860_Porphyrin_metabolism	0.209776	0.308442	0.135002	0.386361	1.19346	24
hsa00900_Terpenoid_backbone_biosynthesis	0.473896	0.561235	0.0822055	-0.336473	-0.996349	22
hsa00910_Nitrogen_metabolism	0.180873	0.27053	0.148262	0.463663	1.25578	15
hsa00920_Sulfur_metabolism	0.285444	0.389568	0.108394	-0.454682	-1.14592	11
hsa00970_Aminoacyl-tRNA_biosynthesis	7.04701e-06	3.39627e-05	0.610527	-0.613512	-2.14817	44
hsa00980_Metabolism_of_xenobiotics_by_cytochrome_P450	0.930279	0.946647	0.048799	0.213946	0.719645	37
hsa00982_Drug_metabolism	0.626953	0.684128	0.0664364	-0.272343	-0.895691	33
hsa00983_Drug_metabolism	0.02662	0.0537043	0.352488	-0.409144	-1.49644	54
hsa01040_Biosynthesis_of_unsaturated_fatty_acids	0.259843	0.362388	0.11725	-0.365501	-1.14265	27
hsa01100_Metabolic_pathways	1.50999e-11	1.6374e-10	0.863415	-0.307883	-1.59224	1313
hsa01200_Carbon_metabolism	0.0172848	0.0394595	0.352488	-0.337691	-1.37436	108
hsa01210_2-Oxocarboxylic_acid_metabolism	0.062	0.110874	0.257206	-0.517382	-1.43997	17
hsa01212_Fatty_acid_metabolism	0.0401888	0.076205	0.321776	-0.402971	-1.49014	56
hsa01230_Biosynthesis_of_amino_acids	0.000911397	0.00290142	0.477271	-0.454822	-1.72917	69
hsa01232_Nucleotide_metabolism	0.0513834	0.0953478	0.282013	-0.347972	-1.3404	75
hsa01240_Biosynthesis_of_cofactors	0.0229623	0.0479996	0.352488	-0.337993	-1.40944	123
hsa01250_Biosynthesis_of_nucleotide_sugars	0.437255	0.523198	0.0852885	-0.300691	-1.00079	35
hsa01521_EGFR_tyrosine_kinase_inhibitor_resistance	0.0275434	0.0549285	0.352488	0.355236	1.40355	76
hsa01522_Endocrine_resistance	0.163306	0.25074	0.154191	0.289374	1.17374	89
hsa01523_Antifolate_resistance	0.448413	0.534705	0.0845557	0.306693	0.988577	28
hsa01524_Platinum_drug_resistance	0.00157719	0.00456072	0.45506	0.438371	1.68688	68
hsa02010_ABC_transporters	0.65098	0.705907	0.0647943	-0.26886	-0.894845	35
hsa03008_Ribosome_biogenesis_in_eukaryotes	0.00330874	0.00869797	0.431708	-0.419485	-1.60598	73
hsa03010_Ribosome	1.60431e-22	5.56696e-20	1.2295	-0.698375	-2.88471	116
hsa03013_Nucleocytoplasmic_transport	0.27704	0.381479	0.110565	-0.265774	-1.08333	107
hsa03015_mRNA_surveillance_pathway	0.880325	0.911859	0.052163	0.200981	0.815065	90
hsa03018_RNA_degradation	0.367063	0.458169	0.0959207	-0.275212	-1.05364	73
hsa03020_RNA_polymerase	0.0489237	0.091765	0.287857	-0.450211	-1.44947	30
hsa03022_Basal_transcription_factors	0.616	0.675136	0.0684715	0.2631	0.906277	41
hsa03030_DNA_replication	0.60041	0.661404	0.0709609	0.278431	0.912878	34
hsa03040_Spliceosome	0.899628	0.926323	0.0471642	-0.194853	-0.819877	128
hsa03050_Proteasome	0.74187	0.787244	0.0602484	0.241602	0.856385	48
hsa03060_Protein_export	2.99248e-08	2.16331e-07	0.719513	-0.774212	-2.39299	26
hsa03250_Viral_life_cycle	0.243852	0.348217	0.124434	0.302774	1.13164	59
hsa03320_PPAR_signaling_pathway	0.408124	0.496909	0.0883594	-0.274244	-1.02067	61
hsa03410_Base_excision_repair	0.426531	0.51391	0.0888945	0.313685	1.01725	31
hsa03420_Nucleotide_excision_repair	0.551724	0.627699	0.0747385	-0.272775	-0.94766	42
hsa03430_Mismatch_repair	0.37721	0.469147	0.0937465	0.344438	1.02591	21
hsa03440_Homologous_recombination	0.307847	0.407721	0.107554	0.319845	1.09535	40
hsa03450_Non-homologous_end-joining	0.32449	0.420142	0.105125	0.427104	1.10153	13
hsa03460_Fanconi_anemia_pathway	0.99182	0.99757	0.04707	-0.176408	-0.632907	50
hsa04010_MAPK_signaling_pathway	3.56166e-08	2.47179e-07	0.719513	0.398481	1.84545	269
hsa04012_ErbB_signaling_pathway	0.0245427	0.0503923	0.352488	0.359341	1.42917	80
hsa04014_Ras_signaling_pathway	4.10245e-09	3.16345e-08	0.761461	0.44835	2.02438	206
hsa04015_Rap1_signaling_pathway	1.74708e-06	9.32672e-06	0.643552	0.399892	1.78545	191
hsa04020_Calcium_signaling_pathway	0.219828	0.320505	0.135741	0.244086	1.09392	198
hsa04022_cGMP-PKG_signaling_pathway	0.0236824	0.0489155	0.352488	0.318156	1.37192	144
hsa04024_cAMP_signaling_pathway	0.00252006	0.00677876	0.431708	0.336634	1.48515	175
hsa04060_Cytokine-cytokine_receptor_interaction	8.34547e-13	1.25908e-11	0.921426	0.49481	2.24873	212
hsa04061_Viral_protein_interaction_with_cytokine_and_cytokine_receptor	2.16782e-08	1.6005e-07	0.733762	0.587425	2.29966	73
hsa04062_Chemokine_signaling_pathway	1.63403e-15	3.78005e-14	1.01754	0.565042	2.4725	164
hsa04064_NF-kappa_B_signaling_pathway	3.121e-15	6.76867e-14	1.00732	0.6531	2.66928	96
hsa04066_HIF-1_signaling_pathway	0.00486903	0.0123325	0.407018	0.367253	1.52284	103
hsa04068_FoxO_signaling_pathway	0.00969882	0.0228945	0.38073	0.334709	1.41548	124
hsa04070_Phosphatidylinositol_signaling_system	0.000530743	0.00188762	0.477271	0.422714	1.71616	93
hsa04071_Sphingolipid_signaling_pathway	0.00341306	0.00890475	0.431708	0.366733	1.53497	113
hsa04072_Phospholipase_D_signaling_pathway	0.0118088	0.0276869	0.38073	0.33601	1.43381	130
hsa04080_Neuroactive_ligand-receptor_interaction	0.99812	1	0.0429311	-0.147404	-0.654722	196
hsa04110_Cell_cycle	0.000472619	0.00173957	0.498493	0.399113	1.68807	122
hsa04114_Oocyte_meiosis	0.0247298	0.0504778	0.352488	0.320523	1.33575	108
hsa04115_p53_signaling_pathway	0.580198	0.643223	0.0709609	-0.243824	-0.931184	72
hsa04120_Ubiquitin_mediated_proteolysis	0.0202392	0.0437273	0.352488	0.305769	1.31301	139
hsa04122_Sulfur_relay_system	0.00926749	0.0220261	0.38073	-0.754503	-1.68778	8
hsa04130_SNARE_interactions_in_vesicular_transport	0.107724	0.174673	0.193813	0.411131	1.32485	29
hsa04136_Autophagy	0.000162101	0.000646541	0.518848	-0.616757	-1.98798	31
hsa04137_Mitophagy	0.0534653	0.0981612	0.276501	-0.353446	-1.33347	67
hsa04140_Autophagy	0.348457	0.442911	0.0937465	-0.248066	-1.04987	131
hsa04141_Protein_processing_in_endoplasmic_reticulum	2.65136e-20	3.89648e-18	1.16907	-0.629698	-2.72095	158
hsa04142_Lysosome	0.00183554	0.00517832	0.45506	0.366132	1.54838	124
hsa04144_Endocytosis	1.48453e-09	1.22651e-08	0.788187	0.446964	2.04782	222
hsa04145_Phagosome	1.33209e-07	8.25417e-07	0.690132	0.490781	2.08768	127
hsa04146_Peroxisome	0.306483	0.40747	0.106323	-0.275909	-1.07416	78
hsa04150_mTOR_signaling_pathway	0.49631	0.581823	0.0753094	-0.231601	-0.989628	143
hsa04151_PI3K-Akt_signaling_pathway	0.00215044	0.00592225	0.431708	0.306382	1.4402	302
hsa04152_AMPK_signaling_pathway	0.272556	0.376801	0.111011	-0.265868	-1.09495	112
hsa04210_Apoptosis	8.31881e-11	8.24751e-10	0.839089	0.538407	2.29498	128
hsa04211_Longevity_regulating_pathway	0.0960784	0.158006	0.202072	-0.317294	-1.24784	84
hsa04213_Longevity_regulating_pathway	0.323587	0.420142	0.102449	-0.289806	-1.06896	57
hsa04215_Apoptosis	0.00456342	0.0117297	0.407018	0.546681	1.76535	30
hsa04216_Ferroptosis	0.169323	0.258833	0.15017	0.361947	1.21747	37
hsa04217_Necroptosis	4.07567e-08	2.77305e-07	0.719513	0.506137	2.13011	120
hsa04218_Cellular_senescence	5.29413e-05	0.000226798	0.557332	0.408367	1.75358	139
hsa04260_Cardiac_muscle_contraction	0.396825	0.488292	0.0913924	-0.2703	-1.03812	74
hsa04261_Adrenergic_signaling_in_cardiomyocytes	0.0283624	0.0562385	0.352488	0.318244	1.35718	131
hsa04270_Vascular_smooth_muscle_contraction	0.0019799	0.0054962	0.431708	0.380506	1.58863	112
hsa04310_Wnt_signaling_pathway	0.572368	0.638623	0.0768737	0.220586	0.952806	147
hsa04330_Notch_signaling_pathway	0.00657668	0.0160712	0.407018	-0.432339	-1.59289	58
hsa04340_Hedgehog_signaling_pathway	0.255361	0.358745	0.117766	0.312505	1.1309	50
hsa04350_TGF-beta_signaling_pathway	0.186613	0.276729	0.143759	0.289242	1.15539	83
hsa04360_Axon_guidance	0.0222786	0.0477201	0.352488	0.296877	1.30907	172
hsa04370_VEGF_signaling_pathway	0.00161186	0.00462243	0.45506	0.477159	1.73803	53
hsa04371_Apelin_signaling_pathway	0.0120643	0.0280961	0.38073	0.330988	1.39975	124
hsa04380_Osteoclast_differentiation	3.1803e-16	1.13667e-14	1.0377	0.632232	2.64891	116
hsa04390_Hippo_signaling_pathway	0.183007	0.272546	0.151149	0.265324	1.13844	140
hsa04392_Hippo_signaling_pathway	0.244939	0.348336	0.123257	0.368762	1.1659	27
hsa04510_Focal_adhesion	6.41319e-06	3.13434e-05	0.610527	0.404211	1.79444	184
hsa04512_ECM-receptor_interaction	0.559921	0.628527	0.0723571	-0.243023	-0.946127	78
hsa04514_Cell_adhesion_molecules	0.00155702	0.00454021	0.45506	0.394158	1.65905	118
hsa04520_Adherens_junction	0.00125272	0.00376035	0.45506	0.439209	1.6967	69
hsa04530_Tight_junction	0.000542801	0.00190255	0.477271	0.378149	1.6251	142
hsa04540_Gap_junction	0.0135542	0.0313555	0.38073	0.376088	1.48594	76
hsa04550_Signaling_pathways_regulating_pluripotency_of_stem_cells	0.260042	0.362388	0.122108	0.260621	1.09276	115
hsa04610_Complement_and_coagulation_cascades	0.000950015	0.00296987	0.477271	0.444322	1.73459	72
hsa04611_Platelet_activation	2.71584e-07	1.51999e-06	0.674963	0.49602	2.07831	114
hsa04612_Antigen_processing_and_presentation	3.90466e-06	1.9356e-05	0.610527	0.60219	2.16465	49
hsa04613_Neutrophil_extracellular_trap_formation	1.68182e-07	9.89136e-07	0.690132	0.481049	2.05363	129
hsa04614_Renin-angiotensin_system	0.343811	0.438612	0.0992333	0.358915	1.06903	21
hsa04620_Toll-like_receptor_signaling_pathway	2.10949e-09	1.70231e-08	0.774939	0.597291	2.38564	82
hsa04621_NOD-like_receptor_signaling_pathway	3.74815e-16	1.13667e-14	1.0377	0.589871	2.54454	145
hsa04622_RIG-I-like_receptor_signaling_pathway	1.07639e-07	6.79101e-07	0.704976	0.634372	2.30501	51
hsa04623_Cytosolic_DNA-sensing_pathway	6.21196e-05	0.000256613	0.538434	0.573926	2.00889	44
hsa04625_C-type_lectin_receptor_signaling_pathway	2.81905e-16	1.13667e-14	1.0377	0.657221	2.73234	106
hsa04630_JAK-STAT_signaling_pathway	1.65924e-07	9.89136e-07	0.690132	0.481144	2.05404	129
hsa04640_Hematopoietic_cell_lineage	1.28093e-11	1.43382e-10	0.875325	0.635882	2.53978	82
hsa04650_Natural_killer_cell_mediated_cytotoxicity	2.70307e-11	2.84232e-10	0.863415	0.609877	2.47375	89
hsa04657_IL-17_signaling_pathway	8.53472e-05	0.000344366	0.538434	0.498718	1.93472	71
hsa04658_Th1_and_Th2_cell_differentiation	3.91802e-12	5.03538e-11	0.887075	0.652531	2.60599	81
hsa04659_Th17_cell_differentiation	1.04241e-13	1.76797e-12	0.954542	0.632238	2.58401	96
hsa04660_T_cell_receptor_signaling_pathway	3.17589e-16	1.13667e-14	1.0377	0.660884	2.72253	99
hsa04662_B_cell_receptor_signaling_pathway	4.42118e-16	1.18012e-14	1.0377	0.706501	2.79141	76
hsa04664_Fc_epsilon_RI_signaling_pathway	5.34405e-07	2.89748e-06	0.659444	0.592851	2.21582	59
hsa04666_Fc_gamma_R-mediated_phagocytosis	1.06995e-13	1.76797e-12	0.954542	0.643333	2.60945	89
hsa04668_TNF_signaling_pathway	1.51241e-08	1.14089e-07	0.733762	0.528309	2.19067	103
hsa04670_Leukocyte_transendothelial_migration	7.19086e-08	4.70798e-07	0.704976	0.529315	2.18053	99
hsa04672_Intestinal_immune_network_for_IgA_production	0.000623678	0.00214274	0.477271	0.558822	1.8616	36
hsa04710_Circadian_rhythm	0.0549115	0.0997607	0.321776	-0.450042	-1.48011	33
hsa04713_Circadian_entrainment	0.00688763	0.0167133	0.407018	0.391718	1.56954	84
hsa04714_Thermogenesis	0.00069283	0.00231165	0.477271	-0.345017	-1.54076	206
hsa04720_Long-term_potentiation	0.0322173	0.0624548	0.321776	0.395544	1.48484	60
hsa04721_Synaptic_vesicle_cycle	0.09375	0.155652	0.2114	0.339791	1.28726	64
hsa04722_Neurotrophin_signaling_pathway	3.07043e-06	1.56682e-05	0.627257	0.468985	1.96494	116
hsa04723_Retrograde_endocannabinoid_signaling	0.162264	0.25074	0.149208	-0.278071	-1.16253	124
hsa04724_Glutamatergic_synapse	0.000492492	0.00178015	0.477271	0.416211	1.70481	97
hsa04725_Cholinergic_synapse	0.00532909	0.0134	0.407018	0.372813	1.53581	99
hsa04726_Serotonergic_synapse	0.00192882	0.00539758	0.45506	0.414399	1.66042	84
hsa04727_GABAergic_synapse	0.0335786	0.064732	0.321776	0.353689	1.38077	72
hsa04728_Dopaminergic_synapse	0.000766677	0.00253369	0.477271	0.396596	1.66288	115
hsa04730_Long-term_depression	0.00436772	0.0113104	0.407018	0.462747	1.67461	50
hsa04740_Olfactory_transduction	0.842767	0.87557	0.0557104	0.205324	0.836529	95
hsa04742_Taste_transduction	0.162602	0.25074	0.155242	-0.345303	-1.20606	43
hsa04744_Phototransduction	0.508065	0.587661	0.0787114	0.32779	0.955784	20
hsa04750_Inflammatory_mediator_regulation_of_TRP_channels	0.00121449	0.00369675	0.45506	0.433167	1.73011	82
hsa04810_Regulation_of_actin_cytoskeleton	1.09681e-12	1.5858e-11	0.91012	0.508051	2.27205	192
hsa04910_Insulin_signaling_pathway	0.000828904	0.00268813	0.477271	0.381223	1.61186	126
hsa04911_Insulin_secretion	0.560158	0.628527	0.0725352	-0.248631	-0.946333	70
hsa04912_GnRH_signaling_pathway	0.000300971	0.00114766	0.498493	0.449064	1.78601	80
hsa04913_Ovarian_steroidogenesis	0.616766	0.675136	0.0683111	-0.271564	-0.908515	36
hsa04914_Progesterone-mediated_oocyte_maturation	0.336714	0.43274	0.102449	0.267032	1.06667	83
hsa04915_Estrogen_signaling_pathway	0.0202884	0.0437273	0.352488	0.339042	1.40586	103
hsa04916_Melanogenesis	0.072	0.12492	0.237794	0.317174	1.27687	85
hsa04917_Prolactin_signaling_pathway	0.0356493	0.0683443	0.321776	0.38246	1.43757	61
hsa04918_Thyroid_hormone_synthesis	0.463035	0.550251	0.0817516	-0.267824	-0.994377	59
hsa04919_Thyroid_hormone_signaling_pathway	0.00119965	0.00368389	0.45506	0.387548	1.61803	112
hsa04920_Adipocytokine_signaling_pathway	0.0182854	0.0412016	0.352488	0.38439	1.46725	65
hsa04921_Oxytocin_signaling_pathway	4.6895e-05	0.000205982	0.557332	0.417224	1.78712	134
hsa04922_Glucagon_signaling_pathway	0.0512295	0.0953478	0.287857	0.320144	1.29897	91
hsa04923_Regulation_of_lipolysis_in_adipocytes	0.690058	0.741332	0.0617054	0.242782	0.878588	50
hsa04924_Renin_secretion	0.000365079	0.00137698	0.498493	0.489787	1.83061	59
hsa04925_Aldosterone_synthesis_and_secretion	0.086	0.143471	0.216543	0.311647	1.25902	87
hsa04926_Relaxin_signaling_pathway	0.00293958	0.00784641	0.431708	0.369715	1.54745	113
hsa04927_Cortisol_synthesis_and_secretion	0.839357	0.874646	0.0538979	0.215622	0.804274	58
hsa04928_Parathyroid_hormone_synthesis,_secretion_and_action	0.0233859	0.0485922	0.352488	0.346972	1.41811	96
hsa04929_GnRH_secretion	0.284569	0.389568	0.112379	0.297145	1.08793	54
hsa04930_Type_II_diabetes_mellitus	0.576846	0.641557	0.0716527	0.274559	0.936824	39
hsa04931_Insulin_resistance	0.0261735	0.0531124	0.352488	0.336228	1.3851	99
hsa04932_Non-alcoholic_fatty_liver_disease	0.0626151	0.110874	0.245042	-0.291254	-1.25015	148
hsa04933_AGE-RAGE_signaling_pathway_in_diabetic_complications	5.77226e-05	0.000241322	0.557332	0.453883	1.85911	97
hsa04934_Cushing_syndrome	0.546436	0.623728	0.0785029	0.22351	0.959024	137
hsa04935_Growth_hormone_synthesis,_secretion_and_action	0.00128658	0.00381574	0.45506	0.388753	1.61591	105
hsa04936_Alcoholic_liver_disease	0.000212316	0.000818597	0.518848	0.414303	1.74006	117
hsa04940_Type_I_diabetes_mellitus	7.39898e-06	3.46952e-05	0.610527	0.720762	2.22641	24
hsa04950_Maturity_onset_diabetes_of_the_young	0.597353	0.660133	0.0672065	-0.358173	-0.90269	11
hsa04960_Aldosterone-regulated_sodium_reabsorption	0.429735	0.51598	0.0883594	0.310487	1.01039	32
hsa04961_Endocrine_and_other_factor-regulated_calcium_reabsorption	0.154762	0.241903	0.157403	0.349101	1.22781	46
hsa04962_Vasopressin-regulated_water_reabsorption	0.400786	0.491423	0.0902635	0.302696	1.03029	38
hsa04964_Proximal_tubule_bicarbonate_reclamation	0.360558	0.45331	0.0972151	-0.372823	-1.0688	19
hsa04966_Collecting_duct_acid_secretion	0.0197792	0.0431659	0.352488	0.524956	1.61212	23
hsa04970_Salivary_secretion	0.0191921	0.0426902	0.352488	0.383342	1.46325	65
hsa04971_Gastric_acid_secretion	0.00248855	0.0067463	0.431708	0.453027	1.70281	61
hsa04972_Pancreatic_secretion	0.0692622	0.120774	0.287805	0.334205	1.31449	78
hsa04973_Carbohydrate_digestion_and_absorption	0.364754	0.45693	0.0982123	0.320094	1.04948	34
hsa04974_Protein_digestion_and_absorption	0.0225295	0.0479615	0.352488	-0.377249	-1.46391	77
hsa04975_Fat_digestion_and_absorption	0.706721	0.756889	0.0626618	0.261379	0.84405	30
hsa04976_Bile_secretion	0.502033	0.58655	0.0797706	0.268097	0.976527	53
hsa04977_Vitamin_digestion_and_absorption	0.0195206	0.0429003	0.352488	-0.594736	-1.70497	19
hsa04978_Mineral_absorption	0.410609	0.498186	0.0888945	0.296971	1.03233	42
hsa04979_Cholesterol_metabolism	0.152918	0.241193	0.159647	0.357511	1.22434	40
hsa05010_Alzheimer_disease	0.0517857	0.0955832	0.266351	-0.255252	-1.2094	342
hsa05012_Parkinson_disease	0.000476251	0.00173957	0.498493	-0.341648	-1.54725	236
hsa05014_Amyotrophic_lateral_sclerosis	0.028755	0.0566931	0.352488	-0.268349	-1.26077	321
hsa05016_Huntington_disease	0.00852066	0.0203908	0.38073	-0.294986	-1.36356	269
hsa05017_Spinocerebellar_ataxia	0.296364	0.397625	0.103576	-0.253735	-1.07612	132
hsa05020_Prion_disease	0.512287	0.590577	0.0749279	-0.215143	-0.980133	242
hsa05022_Pathways_of_neurodegeneration	0.0958409	0.158006	0.193813	-0.237965	-1.14211	418
hsa05030_Cocaine_addiction	0.231388	0.333161	0.126876	0.334753	1.1464	40
hsa05031_Amphetamine_addiction	0.17623	0.265877	0.149208	0.322889	1.20682	59
hsa05032_Morphine_addiction	0.0195338	0.0429003	0.352488	0.370869	1.46088	77
hsa05033_Nicotine_addiction	0.314961	0.415556	0.104733	-0.354066	-1.09437	26
hsa05034_Alcoholism	0.0993658	0.162641	0.206588	0.293624	1.2419	122
hsa05100_Bacterial_invasion_of_epithelial_cells	2.57867e-07	1.46688e-06	0.674963	0.576057	2.23111	70
hsa05110_Vibrio_cholerae_infection	0.118474	0.189449	0.183024	-0.354229	-1.26	46
hsa05120_Epithelial_cell_signaling_in_Helicobacter_pylori_infection	0.00125706	0.00376035	0.45506	0.468713	1.76177	61
hsa05130_Pathogenic_Escherichia_coli_infection	9.6178e-12	1.11246e-10	0.875325	0.512315	2.26021	175
hsa05131_Shigellosis	2.00089e-12	2.77724e-11	0.898671	0.485195	2.21394	216
hsa05132_Salmonella_infection	3.93083e-16	1.13667e-14	1.0377	0.510273	2.34355	234
hsa05133_Pertussis	1.20754e-10	1.16394e-09	0.826657	0.640114	2.48325	71
hsa05134_Legionellosis	0.000662439	0.00223171	0.477271	0.504815	1.82684	50
hsa05135_Yersinia_infection	8.96207e-19	7.7746e-17	1.11466	0.64436	2.74793	131
hsa05140_Leishmaniasis	6.9186e-12	8.27846e-11	0.887075	0.670985	2.57506	67
hsa05142_Chagas_disease	2.70039e-10	2.40265e-09	0.814036	0.579223	2.36734	96
hsa05143_African_trypanosomiasis	3.22917e-08	2.28678e-07	0.719513	0.676207	2.3669	44
hsa05144_Malaria	4.87937e-05	0.000211643	0.557332	0.561543	2.01854	49
hsa05145_Toxoplasmosis	1.43544e-09	1.21487e-08	0.788187	0.562944	2.33139	100
hsa05146_Amoebiasis	0.000533104	0.00188762	0.477271	0.439953	1.76281	84
hsa05150_Staphylococcus_aureus_infection	3.36886e-05	0.000151817	0.557332	0.569202	2.01399	47
hsa05152_Tuberculosis	5.53345e-18	3.84022e-16	1.09593	0.606711	2.64321	155
hsa05160_Hepatitis_C	2.47257e-12	3.29994e-11	0.898671	0.553475	2.37753	138
hsa05161_Hepatitis_B	2.17455e-10	1.98571e-09	0.826657	0.518726	2.23308	146
hsa05162_Measles	5.11079e-12	6.33373e-11	0.887075	0.558838	2.38466	130
hsa05163_Human_cytomegalovirus_infection	1.17568e-15	2.91401e-14	1.01754	0.537184	2.40579	193
hsa05164_Influenza_A	3.36872e-20	3.89648e-18	1.16018	0.63311	2.7208	142
hsa05165_Human_papillomavirus_infection	0.000632436	0.00215152	0.477271	0.312398	1.45648	284
hsa05166_Human_T-cell_leukemia_virus_1_infection	2.97728e-09	2.348e-08	0.774939	0.453475	2.03538	199
hsa05167_Kaposi_sarcoma-associated_herpesvirus_infection	6.62325e-13	1.04467e-11	0.921426	0.538778	2.36208	162
hsa05168_Herpes_simplex_virus_1_infection	4.97679e-14	9.08918e-13	0.965328	0.466443	2.17468	284
hsa05169_Epstein-Barr_virus_infection	3.35657e-16	1.13667e-14	1.0377	0.563881	2.48719	176
hsa05170_Human_immunodeficiency_virus_1_infection	1.23601e-17	7.14824e-16	1.08644	0.567777	2.52161	183
hsa05171_Coronavirus_disease	0.00179481	0.00510492	0.45506	-0.337362	-1.49822	193
hsa05200_Pathways_in_cancer	2.97106e-11	3.03222e-10	0.851339	0.378164	1.83976	473
hsa05202_Transcriptional_misregulation_in_cancer	5.883e-10	5.1035e-09	0.801216	0.494924	2.16568	164
hsa05203_Viral_carcinogenesis	2.6108e-06	1.35216e-05	0.627257	0.429371	1.87728	160
hsa05204_Chemical_carcinogenesis	0.912955	0.937265	0.0503964	0.224089	0.704109	26
hsa05205_Proteoglycans_in_cancer	5.11625e-07	2.818e-06	0.659444	0.418007	1.85726	187
hsa05206_MicroRNAs_in_cancer	0.00314359	0.00832692	0.431708	0.340632	1.48159	154
hsa05207_Chemical_carcinogenesis	0.0813704	0.137734	0.231127	0.277192	1.20762	155
hsa05208_Chemical_carcinogenesis	0.292683	0.395179	0.106323	-0.240716	-1.06667	194
hsa05210_Colorectal_cancer	0.00563742	0.0140733	0.407018	0.378097	1.52782	88
hsa05211_Renal_cell_carcinoma	0.000182897	0.000721197	0.518848	0.474595	1.82627	68
hsa05212_Pancreatic_cancer	0.00119222	0.00368389	0.45506	0.440496	1.7394	75
hsa05213_Endometrial_cancer	0.0226815	0.0479907	0.352488	0.389228	1.45183	58
hsa05214_Glioma	0.00467618	0.0119311	0.407018	0.419948	1.62649	70
hsa05215_Prostate_cancer	0.00130564	0.00383946	0.45506	0.397724	1.6308	98
hsa05216_Thyroid_cancer	0.0577689	0.10428	0.266351	0.407253	1.36987	37
hsa05217_Basal_cell_carcinoma	0.341948	0.437845	0.100279	-0.290504	-1.06252	54
hsa05218_Melanoma	0.321649	0.420142	0.106323	0.282135	1.06322	62
hsa05219_Bladder_cancer	0.533469	0.610936	0.0764767	-0.282523	-0.95247	38
hsa05220_Chronic_myeloid_leukemia	0.00568914	0.0141009	0.407018	0.408937	1.61306	74
hsa05221_Acute_myeloid_leukemia	8.56271e-06	3.96168e-05	0.593325	0.529509	2.03211	67
hsa05222_Small_cell_lung_cancer	0.000418674	0.00156215	0.498493	0.433894	1.75994	89
hsa05223_Non-small_cell_lung_cancer	0.000935333	0.00295055	0.477271	0.455155	1.76285	70
hsa05224_Breast_cancer	0.484581	0.569999	0.0860347	0.233983	0.989309	126
hsa05225_Hepatocellular_carcinoma	0.0820014	0.138129	0.287805	0.292007	1.26716	151
hsa05226_Gastric_cancer	0.390456	0.482164	0.0975449	0.240841	1.02449	127
hsa05230_Central_carbon_metabolism_in_cancer	0.507968	0.587661	0.0780892	-0.258296	-0.969055	66
hsa05231_Choline_metabolism_in_cancer	8.47925e-05	0.000344366	0.538434	0.451132	1.83296	92
hsa05235_PD-L1_expression_and_PD-1_checkpoint_pathway_in_cancer	2.76221e-14	5.32493e-13	0.975995	0.663949	2.67292	85
hsa05310_Asthma	0.000843874	0.00271134	0.477271	0.686738	1.98058	19
hsa05320_Autoimmune_thyroid_disease	7.3244e-06	3.46952e-05	0.610527	0.752888	2.1953	20
hsa05321_Inflammatory_bowel_disease	1.96135e-10	1.83943e-09	0.826657	0.693849	2.53702	52
hsa05322_Systemic_lupus_erythematosus	1.16024e-05	5.29741e-05	0.593325	0.519123	2.04769	74
hsa05323_Rheumatoid_arthritis	2.54352e-06	1.33727e-05	0.627257	0.548331	2.12373	70
hsa05330_Allograft_rejection	9.49136e-08	6.09908e-07	0.704976	0.808417	2.40787	21
hsa05332_Graft-versus-host_disease	3.22709e-06	1.6229e-05	0.627257	0.73268	2.26322	24
hsa05340_Primary_immunodeficiency	6.51573e-08	4.34799e-07	0.704976	0.690869	2.35151	38
hsa05410_Hypertrophic_cardiomyopathy	0.0296532	0.0578071	0.352488	0.35574	1.42086	82
hsa05412_Arrhythmogenic_right_ventricular_cardiomyopathy	0.0626263	0.110874	0.257206	0.335373	1.29893	70
hsa05414_Dilated_cardiomyopathy	0.00596266	0.0146741	0.407018	0.380339	1.53116	85
hsa05415_Diabetic_cardiomyopathy	0.0839416	0.140714	0.208955	-0.276723	-1.21962	179
hsa05416_Viral_myocarditis	1.55096e-07	9.44182e-07	0.690132	0.658185	2.30382	44
hsa05417_Lipid_and_atherosclerosis	2.22727e-14	4.54624e-13	0.975995	0.539077	2.38395	179
hsa05418_Fluid_shear_stress_and_atherosclerosis	5.68077e-05	0.000240394	0.557332	0.419405	1.79047	129

## Sheet: BIOCARTA_PPMBC-vs-MBC
pathway	pval	padj	log2err	ES	NES	size
BIOCARTA_HIVNEF_PATHWAY	7.95e-09	2.32e-06	0.74774	0.665715	2.42289	53
BIOCARTA_TCR_PATHWAY	3.85e-07	5.62e-05	0.674963	0.663747	2.32001	44
BIOCARTA_DEATH_PATHWAY	1.35e-06	0.000131855	0.643552	0.734802	2.30234	27
BIOCARTA_TH1TH2_PATHWAY	2.57e-06	0.000150161	0.627257	0.787949	2.19818	18
BIOCARTA_TNFR2_PATHWAY	2.32e-06	0.000150161	0.627257	0.799538	2.18028	17
BIOCARTA_BCR_PATHWAY	4.5e-06	0.000219109	0.610527	0.682045	2.21879	33
BIOCARTA_VIP_PATHWAY	5.34e-06	0.000222698	0.610527	0.72689	2.17698	24
BIOCARTA_CTLA4_PATHWAY	1.07e-05	0.000283329	0.593325	0.76474	2.13343	18
BIOCARTA_FCER1_PATHWAY	8.41e-06	0.000283329	0.593325	0.632608	2.15553	39
BIOCARTA_FMLP_PATHWAY	1.01e-05	0.000283329	0.593325	0.67084	2.18234	33
BIOCARTA_NFKB_PATHWAY	1.05e-05	0.000283329	0.593325	0.753645	2.1895	21
BIOCARTA_CSK_PATHWAY	1.34e-05	0.000325607	0.593325	0.770013	2.09977	17
BIOCARTA_IL10_PATHWAY	1.64e-05	0.000367334	0.57561	0.80308	2.09997	14
BIOCARTA_CASPASE_PATHWAY	2.71e-05	0.000503608	0.57561	0.693908	2.0782	24
BIOCARTA_NO2IL12_PATHWAY	2.63e-05	0.000503608	0.57561	0.795778	2.12583	15
BIOCARTA_TCYTOTOXIC_PATHWAY	2.93e-05	0.000503608	0.57561	0.811827	2.05867	13
BIOCARTA_THELPER_PATHWAY	2.93e-05	0.000503608	0.57561	0.812587	2.0606	13
BIOCARTA_TCRA_PATHWAY	3.55e-05	0.000576045	0.557332	0.86279	2.03386	10
BIOCARTA_IL2RB_PATHWAY	4.13e-05	0.000635252	0.557332	0.62346	2.09066	36
BIOCARTA_GPCR_PATHWAY	5.36e-05	0.000782146	0.557332	0.669224	2.10014	28
BIOCARTA_IL1R_PATHWAY	6.81e-05	0.000947169	0.538434	0.648707	2.05616	29
BIOCARTA_41BB_PATHWAY	9.42e-05	0.00125078	0.538434	0.735091	2.00454	17
BIOCARTA_KERATINOCYTE_PATHWAY	0.00010579	0.00134307	0.538434	0.570527	2.00855	45
BIOCARTA_NKT_PATHWAY	0.000139363	0.00169559	0.518848	0.665005	1.99164	24
BIOCARTA_MEF2D_PATHWAY	0.000160452	0.00187408	0.518848	0.72297	1.97149	17
BIOCARTA_FAS_PATHWAY	0.000182949	0.00205465	0.518848	0.622774	1.97397	29
BIOCARTA_IL12_PATHWAY	0.000196331	0.00212328	0.518848	0.697195	1.96807	19
BIOCARTA_RELA_PATHWAY	0.000222805	0.00232354	0.518848	0.752488	2.01018	15
BIOCARTA_CALCINEURIN_PATHWAY	0.000264296	0.00266119	0.498493	0.71013	1.93647	17
BIOCARTA_CBL_PATHWAY	0.000293072	0.00276055	0.498493	0.782604	1.93732	12
BIOCARTA_GATA3_PATHWAY	0.000289483	0.00276055	0.498493	0.800043	1.94805	11
BIOCARTA_DC_PATHWAY	0.000353604	0.00312886	0.498493	0.761934	1.93215	13
BIOCARTA_NFAT_PATHWAY	0.000347077	0.00312886	0.498493	0.545524	1.897	43
BIOCARTA_CHEMICAL_PATHWAY	0.000370982	0.00318608	0.498493	0.702841	1.9166	17
BIOCARTA_SODD_PATHWAY	0.000440529	0.00367527	0.498493	0.814065	1.919	10
BIOCARTA_ERAD_PATHWAY	0.000514159	0.0041704	0.477271	-0.684448	-1.88419	18
BIOCARTA_ASBCELL_PATHWAY	0.000591134	0.00450102	0.477271	0.781318	1.90246	11
BIOCARTA_IFNG_PATHWAY	0.000601164	0.00450102	0.477271	0.879893	1.78236	6
BIOCARTA_STRESS_PATHWAY	0.000582218	0.00450102	0.477271	0.630569	1.8885	24
BIOCARTA_CTL_PATHWAY	0.000622455	0.00454392	0.477271	0.65087	1.93276	22
BIOCARTA_TCAPOPTOSIS_PATHWAY	0.00064964	0.0046267	0.477271	0.808782	1.85418	9
BIOCARTA_CREB_PATHWAY	0.000717485	0.00498823	0.477271	0.670239	1.94719	21
BIOCARTA_IL22BP_PATHWAY	0.000771153	0.00523667	0.477271	0.803144	1.84125	9
BIOCARTA_TOLL_PATHWAY	0.000825457	0.00547803	0.477271	0.610418	1.86539	25
BIOCARTA_BBCELL_PATHWAY	0.000972375	0.00617247	0.477271	0.840811	1.78998	7
BIOCARTA_NOS1_PATHWAY	0.000971518	0.00617247	0.477271	0.654757	1.84827	19
BIOCARTA_IL17_PATHWAY	0.00109011	0.00663148	0.45506	0.793767	1.87115	10
BIOCARTA_NTHI_PATHWAY	0.00107916	0.00663148	0.45506	0.633777	1.882	22
BIOCARTA_D4GDI_PATHWAY	0.00137331	0.00802014	0.45506	0.713908	1.90712	15
BIOCARTA_TID_PATHWAY	0.0013488	0.00802014	0.45506	0.646498	1.82496	19
BIOCARTA_NEUTROPHIL_PATHWAY	0.00140688	0.0080551	0.45506	0.78697	1.85513	10
BIOCARTA_MONOCYTE_PATHWAY	0.00144709	0.00812598	0.45506	0.731006	1.85372	13
BIOCARTA_MAPK_PATHWAY	0.00156361	0.00861463	0.45506	0.423706	1.65742	77
BIOCARTA_CYTOKINE_PATHWAY	0.00161844	0.00875154	0.45506	0.751466	1.82977	11
BIOCARTA_PYK2_PATHWAY	0.00215756	0.0114547	0.431708	0.586974	1.8131	26
BIOCARTA_EGF_PATHWAY	0.0022306	0.011631	0.431708	0.58559	1.83482	27
BIOCARTA_IL2_PATHWAY	0.00239931	0.0122912	0.431708	0.613761	1.82257	22
BIOCARTA_AT1R_PATHWAY	0.00277954	0.0139936	0.431708	0.576756	1.78153	26
BIOCARTA_CD40_PATHWAY	0.0028744	0.0142258	0.431708	0.694501	1.85528	15
BIOCARTA_IL7_PATHWAY	0.00296894	0.0144489	0.431708	0.661121	1.79737	16
BIOCARTA_IL4_PATHWAY	0.00323963	0.0155078	0.431708	0.75802	1.78689	10
BIOCARTA_HSP27_PATHWAY	0.00350893	0.0165259	0.431708	0.702134	1.7805	13
BIOCARTA_PDGF_PATHWAY	0.00396546	0.0180924	0.407018	0.564036	1.77004	28
BIOCARTA_PML_PATHWAY	0.00394076	0.0180924	0.407018	0.686729	1.83452	15
BIOCARTA_BLYMPHOCYTE_PATHWAY	0.0045529	0.020453	0.407018	0.703967	1.74265	12
BIOCARTA_LAIR_PATHWAY	0.00471568	0.0208633	0.407018	0.614482	1.71425	18
BIOCARTA_CACAM_PATHWAY	0.00512271	0.0223176	0.407018	0.750598	1.72079	9
BIOCARTA_MCALPAIN_PATHWAY	0.00519726	0.0223176	0.407018	0.643891	1.75053	16
BIOCARTA_NPP1_PATHWAY	0.00551511	0.0233393	0.407018	-0.799364	-1.7055	7
BIOCARTA_BIOPEPTIDES_PATHWAY	0.00662192	0.0272338	0.407018	0.545193	1.71091	28
BIOCARTA_UCALPAIN_PATHWAY	0.00659995	0.0272338	0.407018	0.683589	1.73348	13
BIOCARTA_LYMPHOCYTE_PATHWAY	0.00711345	0.0287549	0.407018	0.730459	1.72192	10
BIOCARTA_MYOSIN_PATHWAY	0.00718873	0.0287549	0.407018	0.729491	1.71963	10
BIOCARTA_TNFR1_PATHWAY	0.00735139	0.0290082	0.407018	0.525619	1.66602	29
BIOCARTA_VDR_PATHWAY	0.00753985	0.0293551	0.407018	0.582801	1.73629	23
BIOCARTA_STEM_PATHWAY	0.00771327	0.0296352	0.407018	0.780956	1.74592	8
BIOCARTA_INTEGRIN_PATHWAY	0.00826167	0.03133	0.38073	0.50679	1.64866	33
BIOCARTA_AHSP_PATHWAY	0.008583	0.0317245	0.38073	0.694972	1.69221	11
BIOCARTA_MITOCHONDRIA_PATHWAY	0.00855328	0.0317245	0.38073	0.596798	1.66491	18
BIOCARTA_BARD1_PATHWAY	0.00935983	0.0337416	0.38073	-0.770324	-1.71331	8
BIOCARTA_CARM1_PATHWAY	0.00934254	0.0337416	0.38073	0.690317	1.68088	11
BIOCARTA_CCR5_PATHWAY	0.0096721	0.0344421	0.38073	0.622476	1.69231	16
BIOCARTA_INFLAM_PATHWAY	0.00994077	0.0349723	0.38073	0.608547	1.65946	17
BIOCARTA_PGC1A_PATHWAY	0.0100735	0.0350175	0.38073	0.650301	1.7372	15
BIOCARTA_TRKA_PATHWAY	0.0103847	0.0356745	0.38073	0.662018	1.67878	13
BIOCARTA_AGPCR_PATHWAY	0.0105149	0.0357017	0.38073	0.713239	1.68132	10
BIOCARTA_MET_PATHWAY	0.0107156	0.0359649	0.38073	0.49475	1.60949	33
BIOCARTA_NKCELLS_PATHWAY	0.0116994	0.0388206	0.38073	0.536745	1.60751	24
BIOCARTA_PKC_PATHWAY	0.0123561	0.0400887	0.38073	0.783638	1.58738	6
BIOCARTA_PPARA_PATHWAY	0.0122989	0.0400887	0.38073	0.432288	1.55602	50
BIOCARTA_ATM_PATHWAY	0.014657	0.0470312	0.38073	0.5475	1.56766	20
BIOCARTA_TPO_PATHWAY	0.0148401	0.0471012	0.38073	0.526143	1.57576	24
BIOCARTA_ARENRF2_PATHWAY	0.01518	0.0475624	0.38073	0.57622	1.60751	18
BIOCARTA_HDAC_PATHWAY	0.0153112	0.0475624	0.38073	0.553952	1.65034	23
BIOCARTA_PPARG_PATHWAY	0.0167743	0.0515589	0.352488	0.747936	1.59226	7
BIOCARTA_CLASSIC_PATHWAY	0.017286	0.0521049	0.352488	0.621089	1.62408	14
BIOCARTA_IFNA_PATHWAY	0.0173088	0.0521049	0.352488	0.764898	1.54942	6
BIOCARTA_P38MAPK_PATHWAY	0.020213	0.0602265	0.352488	0.480676	1.61186	36
BIOCARTA_SPPA_PATHWAY	0.0205556	0.0606287	0.352488	0.616332	1.64646	15
BIOCARTA_IL3_PATHWAY	0.0212633	0.0616026	0.352488	0.608575	1.59136	14
BIOCARTA_P35ALZHEIMERS_PATHWAY	0.0213078	0.0616026	0.352488	0.739686	1.5747	7
BIOCARTA_MELANOCYTE_PATHWAY	0.0219122	0.0627291	0.352488	0.739219	1.5737	7
BIOCARTA_SRCRPTP_PATHWAY	0.0238703	0.0676711	0.352488	0.678007	1.59827	10
BIOCARTA_CK1_PATHWAY	0.0246286	0.0691496	0.352488	0.602056	1.57431	14
BIOCARTA_RACCYCD_PATHWAY	0.0258214	0.071808	0.352488	0.499911	1.52769	25
BIOCARTA_CIRCADIAN_PATHWAY	0.0268108	0.0722931	0.352488	-0.781347	-1.59033	6
BIOCARTA_GH_PATHWAY	0.0269861	0.0722931	0.352488	0.486858	1.50385	26
BIOCARTA_GRANULOCYTES_PATHWAY	0.0267377	0.0722931	0.352488	0.601326	1.60637	15
BIOCARTA_SPRY_PATHWAY	0.0269044	0.0722931	0.352488	0.571935	1.55491	16
BIOCARTA_SET_PATHWAY	0.0341279	0.0905941	0.321776	0.58989	1.5425	14
BIOCARTA_GCR_PATHWAY	0.0384322	0.101101	0.321776	0.583929	1.52691	14
BIOCARTA_S1P_PATHWAY	0.0497184	0.129623	0.321776	-0.699229	-1.55519	8
BIOCARTA_CDC42RAC_PATHWAY	0.0503018	0.129983	0.287857	0.692031	1.54712	8
BIOCARTA_EICOSANOID_PATHWAY	0.0541667	0.137941	0.282013	0.529939	1.53959	21
BIOCARTA_EPHA4_PATHWAY	0.054326	0.137941	0.276501	0.69094	1.54468	8
BIOCARTA_AKT_PATHWAY	0.05625	0.141595	0.276501	0.525998	1.52814	21
BIOCARTA_NO1_PATHWAY	0.056962	0.142162	0.276501	0.477692	1.47554	26
BIOCARTA_PLCD_PATHWAY	0.0595483	0.147357	0.266351	0.759704	1.45489	5
BIOCARTA_ERYTH_PATHWAY	0.0609756	0.149621	0.261664	0.635913	1.49904	10
BIOCARTA_ECM_PATHWAY	0.0621118	0.150252	0.261664	0.535985	1.49526	18
BIOCARTA_ERK_PATHWAY	0.0632911	0.150252	0.261664	0.468707	1.44778	26
BIOCARTA_PTDINS_PATHWAY	0.0625	0.150252	0.261664	0.505375	1.50071	22
BIOCARTA_VITCB_PATHWAY	0.0628295	0.150252	0.287805	-0.676009	-1.50354	8
BIOCARTA_STATHMIN_PATHWAY	0.0641822	0.151139	0.257206	0.530393	1.47966	18
BIOCARTA_ALTERNATIVE_PATHWAY	0.0663984	0.155107	0.248911	0.676242	1.51182	8
BIOCARTA_RNA_PATHWAY	0.0691057	0.16015	0.245042	0.620637	1.46303	10
BIOCARTA_TFF_PATHWAY	0.0701031	0.161182	0.245042	0.518855	1.48564	20
BIOCARTA_BCELLSURVIVAL_PATHWAY	0.0723141	0.16211	0.24134	0.535479	1.43047	15
BIOCARTA_COMP_PATHWAY	0.0726496	0.16211	0.245042	0.537553	1.46587	17
BIOCARTA_DNAFRAGMENT_PATHWAY	0.0723141	0.16211	0.24134	0.536462	1.43309	15
BIOCARTA_HBX_PATHWAY	0.0727273	0.16211	0.237794	0.688332	1.46537	7
BIOCARTA_ACTINY_PATHWAY	0.0785124	0.172373	0.231127	0.579539	1.43463	12
BIOCARTA_TOB1_PATHWAY	0.0781893	0.172373	0.231127	0.509148	1.43724	19
BIOCARTA_MAL_PATHWAY	0.0807453	0.174649	0.227987	0.512712	1.43034	18
BIOCARTA_PTEN_PATHWAY	0.0807453	0.174649	0.227987	0.51342	1.43231	18
BIOCARTA_CDMAC_PATHWAY	0.0831601	0.17855	0.224966	0.518337	1.40919	16
BIOCARTA_TERC_PATHWAY	0.0865191	0.184406	0.216543	0.695621	1.40909	6
BIOCARTA_EDG1_PATHWAY	0.0895833	0.188252	0.216543	0.472089	1.40187	22
BIOCARTA_LYM_PATHWAY	0.089613	0.188252	0.213928	0.554608	1.4064	13
BIOCARTA_CCR3_PATHWAY	0.0935551	0.189825	0.2114	0.5136	1.39631	16
BIOCARTA_EOSINOPHILS_PATHWAY	0.092437	0.189825	0.213928	0.814726	1.36844	3
BIOCARTA_FREE_PATHWAY	0.0942623	0.189825	0.208955	0.616175	1.41262	9
BIOCARTA_HCMV_PATHWAY	0.0918803	0.189825	0.216543	0.513708	1.40084	17
BIOCARTA_HER2_PATHWAY	0.09375	0.189825	0.2114	0.481576	1.39908	21
BIOCARTA_PLCE_PATHWAY	0.0934959	0.189825	0.208955	0.594201	1.40071	10
BIOCARTA_IGF1R_PATHWAY	0.0958333	0.191667	0.208955	0.466361	1.38486	22
BIOCARTA_IL6_PATHWAY	0.0979167	0.194501	0.206588	0.480128	1.39488	21
BIOCARTA_CERAMIDE_PATHWAY	0.1	0.197297	0.204295	0.476895	1.38548	21
BIOCARTA_EPO_PATHWAY	0.10352	0.202871	0.199915	0.494193	1.37867	18
BIOCARTA_GLEEVEC_PATHWAY	0.109705	0.213558	0.195789	0.45493	1.35533	23
BIOCARTA_RAC1_PATHWAY	0.111111	0.214864	0.191892	0.490004	1.3832	19
BIOCARTA_CFTR_PATHWAY	0.112705	0.215097	0.190023	0.595766	1.36583	9
BIOCARTA_HSWI_SNF_PATHWAY	0.112245	0.215097	0.190023	0.566293	1.37888	11
BIOCARTA_PCAF_PATHWAY	0.118126	0.22398	0.184706	0.536751	1.36112	13
BIOCARTA_GSK3_PATHWAY	0.125514	0.236453	0.179782	0.474799	1.34028	19
BIOCARTA_IL5_PATHWAY	0.126761	0.23727	0.176694	0.612749	1.36988	8
BIOCARTA_EPONFKB_PATHWAY	0.134146	0.249495	0.172324	0.573516	1.35195	10
BIOCARTA_MHC_PATHWAY	0.138493	0.255949	0.169571	0.523542	1.32762	13
BIOCARTA_BAD_PATHWAY	0.14346	0.26232	0.169571	0.433513	1.29153	23
BIOCARTA_LDL_PATHWAY	0.143737	0.26232	0.166934	0.694587	1.33018	5
BIOCARTA_LECTIN_PATHWAY	0.146881	0.266393	0.16318	0.588913	1.31659	8
BIOCARTA_CARDIACEGF_PATHWAY	0.151709	0.270117	0.165657	0.474869	1.29493	17
BIOCARTA_CXCR4_PATHWAY	0.151709	0.270117	0.165657	0.474986	1.29525	17
BIOCARTA_TSP1_PATHWAY	0.151515	0.270117	0.160801	0.626722	1.33421	7
BIOCARTA_AKAP13_PATHWAY	0.156504	0.276965	0.158514	0.552436	1.30226	10
BIOCARTA_PLC_PATHWAY	0.159836	0.281157	0.157403	0.570546	1.30801	9
BIOCARTA_RHODOPSIN_PATHWAY	0.164356	0.287378	0.152145	-0.584247	-1.29945	8
BIOCARTA_ERK5_PATHWAY	0.167689	0.29146	0.153159	0.49214	1.28689	14
BIOCARTA_SM_PATHWAY	0.177734	0.307091	0.144631	-0.521708	-1.26823	11
BIOCARTA_RHO_PATHWAY	0.181443	0.311656	0.147331	0.431766	1.23628	20
BIOCARTA_DREAM_PATHWAY	0.193878	0.330103	0.141225	0.516652	1.25801	11
BIOCARTA_PAR1_PATHWAY	0.194444	0.330103	0.144631	0.454676	1.23987	17
BIOCARTA_CPSF_PATHWAY	0.202869	0.340447	0.138022	0.546423	1.25271	9
BIOCARTA_PROTEASOME_PATHWAY	0.202312	0.340447	0.133555	-0.444748	-1.22433	18
BIOCARTA_ION_PATHWAY	0.205339	0.342622	0.137251	0.658792	1.26163	5
BIOCARTA_CDK5_PATHWAY	0.210744	0.347668	0.135741	0.499557	1.23664	12
BIOCARTA_TALL1_PATHWAY	0.210744	0.347668	0.135741	0.460346	1.22976	15
BIOCARTA_AKAP95_PATHWAY	0.215164	0.352966	0.133555	0.538732	1.23507	9
BIOCARTA_RANKL_PATHWAY	0.228106	0.372106	0.128789	0.477148	1.20997	13
BIOCARTA_FXR_PATHWAY	0.234086	0.37974	0.127505	0.650805	1.24634	5
BIOCARTA_MITR_PATHWAY	0.235931	0.380618	0.130777	0.683309	1.23602	4
BIOCARTA_RAS_PATHWAY	0.2375	0.381044	0.127505	0.394691	1.17204	22
BIOCARTA_EIF4_PATHWAY	0.247917	0.395583	0.124434	0.392764	1.16631	22
BIOCARTA_MSP_PATHWAY	0.255533	0.40552	0.119888	0.595663	1.20661	6
BIOCARTA_PEPI_PATHWAY	0.257545	0.406504	0.119348	0.594747	1.20475	6
BIOCARTA_ETC_PATHWAY	0.274319	0.430363	0.112843	-0.507641	-1.1704	9
BIOCARTA_INSULIN_PATHWAY	0.277083	0.430363	0.116739	0.390255	1.13378	21
BIOCARTA_NGF_PATHWAY	0.27572	0.430363	0.116234	0.404803	1.14269	19
BIOCARTA_CARM_ER_PATHWAY	0.2827	0.436765	0.116234	0.377295	1.12997	24
BIOCARTA_WNT_PATHWAY	0.285985	0.439514	0.108394	-0.390482	-1.14382	23
BIOCARTA_ARAP_PATHWAY	0.290598	0.443446	0.11524	0.421236	1.14868	17
BIOCARTA_SALMONELLA_PATHWAY	0.291581	0.443446	0.112379	0.620468	1.18824	5
BIOCARTA_CELLCYCLE_PATHWAY	0.298354	0.448935	0.111011	0.397014	1.1207	19
BIOCARTA_CTBP1_PATHWAY	0.299803	0.448935	0.107972	-0.541328	-1.15496	7
BIOCARTA_ETS_PATHWAY	0.297009	0.448935	0.113787	0.420643	1.14706	17
BIOCARTA_ARF_PATHWAY	0.305182	0.451641	0.105125	-0.423994	-1.13907	16
BIOCARTA_BARRESTIN_SRC_PATHWAY	0.305613	0.451641	0.110122	0.414817	1.12775	16
BIOCARTA_IGF1_PATHWAY	0.30625	0.451641	0.110122	0.37951	1.10256	21
BIOCARTA_VOBESITY_PATHWAY	0.309091	0.45354	0.107554	0.538543	1.14649	7
BIOCARTA_EGFR_SMRTE_PATHWAY	0.312245	0.454168	0.107554	0.463711	1.12911	11
BIOCARTA_MPR_PATHWAY	0.312629	0.454168	0.108394	0.400608	1.11759	18
BIOCARTA_CTCF_PATHWAY	0.320833	0.463779	0.10714	0.363159	1.0784	22
BIOCARTA_STAT3_PATHWAY	0.327968	0.471757	0.103576	0.507662	1.13494	8
BIOCARTA_NUCLEARRS_PATHWAY	0.335417	0.480106	0.104344	0.370625	1.07674	21
BIOCARTA_PRC2_PATHWAY	0.338086	0.481566	0.102449	0.434498	1.10182	13
BIOCARTA_ALK_PATHWAY	0.348684	0.494251	0.105125	0.334961	1.07454	31
BIOCARTA_SAM68_PATHWAY	0.373717	0.527175	0.0968878	0.573781	1.09883	5
BIOCARTA_AGR_PATHWAY	0.376344	0.528329	0.0992333	0.331837	1.06306	30
BIOCARTA_SHH_PATHWAY	0.380368	0.531423	0.0956031	0.4032	1.05433	14
BIOCARTA_PLK3_PATHWAY	0.384306	0.534368	0.0940503	0.486598	1.08785	8
BIOCARTA_DICER_PATHWAY	0.394251	0.540475	0.0937465	0.562704	1.07762	5
BIOCARTA_G1_PATHWAY	0.392405	0.540475	0.0956031	0.349655	1.04719	24
BIOCARTA_LEPTIN_PATHWAY	0.390625	0.540475	0.0913924	-0.437234	-1.06288	11
BIOCARTA_PARKIN_PATHWAY	0.396304	0.540751	0.0934449	0.561261	1.07485	5
BIOCARTA_NDKDYNAMIN_PATHWAY	0.399168	0.542126	0.0937465	0.376632	1.02394	16
BIOCARTA_RARRXR_PATHWAY	0.406061	0.548934	0.0911073	0.500705	1.06593	7
BIOCARTA_EXTRINSIC_PATHWAY	0.42418	0.570786	0.0894367	0.451139	1.03426	9
BIOCARTA_HIF_PATHWAY	0.426614	0.571429	0.08654	-0.409558	-1.03055	13
BIOCARTA_ERBB4_PATHWAY	0.431211	0.574949	0.0886261	0.547751	1.04898	5
BIOCARTA_CHREBP_PATHWAY	0.452991	0.601243	0.0880945	0.364589	0.994208	17
BIOCARTA_KREB_PATHWAY	0.457594	0.604603	0.0831291	-0.476634	-1.01693	7
BIOCARTA_FBW7_PATHWAY	0.468872	0.611208	0.0810802	-0.434827	-1.00252	9
BIOCARTA_INTRINSIC_PATHWAY	0.467775	0.611208	0.0847985	0.361625	0.983141	16
BIOCARTA_TEL_PATHWAY	0.465696	0.611208	0.0850427	0.363631	0.988595	16
BIOCARTA_CB1R_PATHWAY	0.473267	0.614196	0.0815265	-0.491141	-0.999656	6
BIOCARTA_MTA3_PATHWAY	0.477756	0.617278	0.0797706	-0.345	-0.982332	20
BIOCARTA_BTG2_PATHWAY	0.502041	0.641419	0.0799859	0.395157	0.962181	11
BIOCARTA_RAB_PATHWAY	0.501931	0.641419	0.0770737	-0.393257	-0.977023	12
BIOCARTA_REELIN_PATHWAY	0.50303	0.641419	0.0793435	0.452353	0.963001	7
BIOCARTA_P53_PATHWAY	0.525562	0.667236	0.0776799	0.361145	0.944356	14
BIOCARTA_BOTULIN_PATHWAY	0.531481	0.671829	0.0720033	-0.544511	-0.980946	4
BIOCARTA_NPC_PATHWAY	0.535124	0.673518	0.0772747	0.378424	0.936779	12
BIOCARTA_PELP1_PATHWAY	0.547284	0.685866	0.0747385	0.464494	0.940906	6
BIOCARTA_P53HYPOXIA_PATHWAY	0.552083	0.685993	0.0760837	0.315927	0.917837	21
BIOCARTA_SKP2E2F_PATHWAY	0.550584	0.685993	0.0727141	-0.40483	-0.933364	9
BIOCARTA_BARRESTIN_PATHWAY	0.559184	0.689747	0.0743625	0.375791	0.915026	11
BIOCARTA_MCM_PATHWAY	0.559829	0.689747	0.0766747	0.338107	0.921992	17
BIOCARTA_FOSB_PATHWAY	0.568932	0.695097	0.0709609	-0.483488	-0.923974	5
BIOCARTA_RAN_PATHWAY	0.566735	0.695097	0.0739901	0.484871	0.928563	5
BIOCARTA_FEEDER_PATHWAY	0.580198	0.705908	0.0709609	-0.415725	-0.924634	8
BIOCARTA_ACH_PATHWAY	0.589041	0.713693	0.0696133	-0.360188	-0.90632	13
BIOCARTA_PITX2_PATHWAY	0.599174	0.721919	0.0714786	0.335968	0.897499	15
BIOCARTA_TGFB_PATHWAY	0.600775	0.721919	0.0681513	-0.322509	-0.902683	19
BIOCARTA_PRION_PATHWAY	0.606122	0.72536	0.0702813	0.363186	0.884333	11
BIOCARTA_AMAN_PATHWAY	0.625483	0.745473	0.0659816	-0.354104	-0.87975	12
BIOCARTA_GABA_PATHWAY	0.630303	0.748165	0.0678338	0.406806	0.866037	7
BIOCARTA_MTOR_PATHWAY	0.63299	0.748312	0.0686326	0.308467	0.883236	20
BIOCARTA_ATRBRCA_PATHWAY	0.654167	0.761023	0.0675189	0.287638	0.854141	22
BIOCARTA_LONGEVITY_PATHWAY	0.64876	0.761023	0.0675189	0.324914	0.86797	15
BIOCARTA_PS1_PATHWAY	0.651731	0.761023	0.0665892	0.340489	0.863428	13
BIOCARTA_RANMS_PATHWAY	0.65102	0.761023	0.0667426	0.352975	0.859469	11
BIOCARTA_DSP_PATHWAY	0.657787	0.762198	0.0664364	0.364618	0.835909	9
BIOCARTA_EIF2_PATHWAY	0.661224	0.763152	0.0659816	0.350469	0.853368	11
BIOCARTA_EEA1_PATHWAY	0.674556	0.76625	0.0633597	-0.391381	-0.835038	7
BIOCARTA_ERBB3_PATHWAY	0.679654	0.76625	0.0675189	0.467795	0.846181	4
BIOCARTA_G2_PATHWAY	0.679325	0.76625	0.0662842	0.286245	0.857282	24
BIOCARTA_LIS1_PATHWAY	0.677686	0.76625	0.0653834	0.317189	0.847334	15
BIOCARTA_MALATEX_PATHWAY	0.678501	0.76625	0.063079	-0.390842	-0.833888	7
BIOCARTA_SUMO_PATHWAY	0.673511	0.76625	0.0653834	0.445189	0.852568	5
BIOCARTA_HES_PATHWAY	0.683673	0.767818	0.0643583	0.344097	0.837853	11
BIOCARTA_PDZS_PATHWAY	0.696581	0.776775	0.0656814	0.304572	0.830546	17
BIOCARTA_SARS_PATHWAY	0.69697	0.776775	0.0629395	0.383624	0.816685	7
BIOCARTA_CELL2CELL_PATHWAY	0.72449	0.80133	0.0615707	0.327067	0.796386	11
BIOCARTA_P27_PATHWAY	0.722114	0.80133	0.0597318	-0.319614	-0.804227	13
BIOCARTA_EIF_PATHWAY	0.742802	0.818484	0.0574877	-0.298743	-0.802577	16
BIOCARTA_ACE2_PATHWAY	0.756809	0.830783	0.0572461	-0.339887	-0.783634	9
BIOCARTA_NOTCH_PATHWAY	0.772636	0.84498	0.057853	0.376313	0.76228	6
BIOCARTA_RNAPOL3_PATHWAY	0.789899	0.860636	0.057006	0.352738	0.750933	7
BIOCARTA_WNT_LRP6_PATHWAY	0.794118	0.862016	0.0585938	0.44261	0.743423	3
BIOCARTA_EFP_PATHWAY	0.80117	0.86645	0.0546808	-0.298728	-0.760724	14
BIOCARTA_IGF1MTOR_PATHWAY	0.804527	0.86687	0.057006	0.269884	0.761837	19
BIOCARTA_IRES_PATHWAY	0.810101	0.869667	0.0558265	0.343624	0.73153	7
BIOCARTA_PLATELETAPP_PATHWAY	0.817121	0.87399	0.053677	-0.318699	-0.734783	9
BIOCARTA_CREM_PATHWAY	0.823194	0.877272	0.0522693	-0.446093	-0.738027	3
BIOCARTA_MRP_PATHWAY	0.842209	0.894273	0.052913	-0.335034	-0.714818	7
BIOCARTA_AKAPCENTROSOME_PATHWAY	0.853306	0.902773	0.0544556	0.284066	0.703197	12
BIOCARTA_TUBBY_PATHWAY	0.869748	0.916846	0.0543434	0.385323	0.647202	3
BIOCARTA_GHRELIN_PATHWAY	0.878049	0.918961	0.0523759	0.285312	0.672569	10
BIOCARTA_TERT_PATHWAY	0.875248	0.918961	0.0513223	-0.301369	-0.670288	8
BIOCARTA_ACETAMINOPHEN_PATHWAY	0.892857	0.926077	0.0531298	0.365971	0.614698	3
BIOCARTA_BARR_MAPK_PATHWAY	0.894094	0.926077	0.0516356	0.26781	0.679124	13
BIOCARTA_FLUMAZENIL_PATHWAY	0.89505	0.926077	0.0502948	-0.324256	-0.659983	6
BIOCARTA_VEGF_PATHWAY	0.897533	0.926077	0.048215	-0.230545	-0.705109	27
BIOCARTA_SLRP_PATHWAY	0.909259	0.934872	0.0465084	-0.342688	-0.617358	4
BIOCARTA_PTC1_PATHWAY	0.942623	0.960422	0.0494905	0.261978	0.6006	9
BIOCARTA_RACC_PATHWAY	0.94501	0.960422	0.049094	0.245054	0.621419	13
BIOCARTA_RANBP2_PATHWAY	0.943089	0.960422	0.049094	0.255717	0.602804	10
BIOCARTA_RB_PATHWAY	0.947266	0.960422	0.04707	-0.249723	-0.607055	11
BIOCARTA_RECK_PATHWAY	0.95082	0.96069	0.049094	0.25961	0.595171	9
BIOCARTA_CDC25_PATHWAY	0.967807	0.974481	0.0474483	0.229041	0.512049	8
BIOCARTA_FIBRINOLYSIS_PATHWAY	0.994083	0.997499	0.0453152	-0.227305	-0.484971	7
BIOCARTA_AMI_PATHWAY	1	1	0.0471642	0.173603	0.429751	12

## Sheet: HALLMARK_PPMBC-vs-MBC
pathway	pval	padj	log2err	ES	NES	size
HALLMARK_ADIPOGENESIS	0.00311166	0.00740871	0.431708	-0.333587	-1.47962	193
HALLMARK_ALLOGRAFT_REJECTION	2.2228e-24	5.55701e-23	1.27903	0.610596	2.72539	199
HALLMARK_ANDROGEN_RESPONSE	0.472727	0.562771	0.0826646	0.246418	0.994799	98
HALLMARK_ANGIOGENESIS	0.52043	0.578256	0.0808589	0.294491	0.955819	32
HALLMARK_APICAL_JUNCTION	5.56148e-05	0.000163573	0.557332	0.374988	1.67934	197
HALLMARK_APICAL_SURFACE	0.580713	0.612745	0.0738053	0.269676	0.920626	40
HALLMARK_APOPTOSIS	5.93399e-05	0.000164833	0.557332	0.401948	1.74191	152
HALLMARK_BILE_ACID_METABOLISM	0.357002	0.457695	0.0972151	-0.257671	-1.04756	98
HALLMARK_CHOLESTEROL_HOMEOSTASIS	0.488978	0.568579	0.08042	-0.255423	-0.979119	72
HALLMARK_COAGULATION	0.000373557	0.000983046	0.498493	0.411826	1.70352	114
HALLMARK_COMPLEMENT	2.89875e-20	4.83125e-19	1.16018	0.584963	2.60519	193
HALLMARK_DNA_REPAIR	0.429889	0.524255	0.0828962	-0.232101	-1.00981	151
HALLMARK_E2F_TARGETS	0.184713	0.263876	0.148262	0.25357	1.12963	194
HALLMARK_EPITHELIAL_MESENCHYMAL_TRANSITION	0.192233	0.26699	0.138022	-0.25113	-1.10785	188
HALLMARK_ESTROGEN_RESPONSE_EARLY	0.0259997	0.0499994	0.352488	-0.29972	-1.31813	183
HALLMARK_ESTROGEN_RESPONSE_LATE	0.588235	0.612745	0.0697793	-0.216318	-0.952677	186
HALLMARK_FATTY_ACID_METABOLISM	0.0245235	0.0490471	0.352488	-0.315512	-1.38015	154
HALLMARK_G2M_CHECKPOINT	0.00369705	0.00840239	0.431708	0.32275	1.43781	194
HALLMARK_GLYCOLYSIS	1.01555e-07	4.23144e-07	0.704976	-0.435893	-1.92764	192
HALLMARK_HEDGEHOG_SIGNALING	0.00636786	0.0138432	0.407018	0.523003	1.71247	33
HALLMARK_HEME_METABOLISM	0.00293237	0.00733091	0.431708	0.325095	1.44486	188
HALLMARK_HYPOXIA	0.518939	0.578256	0.0743625	-0.220718	-0.980105	196
HALLMARK_IL2_STAT5_SIGNALING	4.00059e-07	1.53869e-06	0.674963	0.424231	1.88935	193
HALLMARK_IL6_JAK_STAT3_SIGNALING	1.2786e-14	1.0655e-13	0.986546	0.677115	2.65467	82
HALLMARK_INFLAMMATORY_RESPONSE	5.76029e-16	5.76029e-15	1.02767	0.551874	2.45422	190
HALLMARK_INTERFERON_ALPHA_RESPONSE	2.90719e-16	3.63398e-15	1.0377	0.643855	2.65419	110
HALLMARK_INTERFERON_GAMMA_RESPONSE	1.73073e-30	8.65366e-29	1.43181	0.648759	2.89541	201
HALLMARK_KRAS_SIGNALING_DN	0.54059	0.587598	0.0709609	-0.221176	-0.965574	153
HALLMARK_KRAS_SIGNALING_UP	1.05187e-06	3.75668e-06	0.643552	0.40791	1.82107	196
HALLMARK_MITOTIC_SPINDLE	1.11156e-09	5.55781e-09	0.788187	0.457243	2.0413	196
HALLMARK_MTORC1_SIGNALING	0.0272913	0.0505394	0.352488	-0.296864	-1.32382	202
HALLMARK_MYC_TARGETS_V1	1.61928e-08	7.36034e-08	0.733762	-0.452533	-1.99478	187
HALLMARK_MYC_TARGETS_V2	5.13683e-10	2.85379e-09	0.801216	-0.684532	-2.51797	55
HALLMARK_MYOGENESIS	0.264151	0.356961	0.113313	-0.243129	-1.07388	180
HALLMARK_NOTCH_SIGNALING	0.0537634	0.0840054	0.287857	0.442857	1.43737	32
HALLMARK_OXIDATIVE_PHOSPHORYLATION	2.3048e-05	7.68267e-05	0.57561	-0.387315	-1.71989	196
HALLMARK_P53_PATHWAY	0.0379433	0.0632388	0.321776	-0.290964	-1.28662	191
HALLMARK_PANCREAS_BETA_CELLS	0.648871	0.648871	0.0672065	0.278278	0.875613	27
HALLMARK_PEROXISOME	0.418605	0.523256	0.0870516	-0.250534	-1.01679	95
HALLMARK_PI3K_AKT_MTOR_SIGNALING	3.19062e-05	9.97069e-05	0.557332	0.462742	1.86504	97
HALLMARK_PROTEIN_SECRETION	0.323587	0.425772	0.102449	-0.266004	-1.06358	90
HALLMARK_REACTIVE_OXYGEN_SPECIES_PATHWAY	0.0283579	0.0506391	0.352488	0.414793	1.48178	49
HALLMARK_SPERMATOGENESIS	0.635246	0.64821	0.0681513	0.228144	0.915524	94
HALLMARK_TGF_BETA_SIGNALING	0.0903491	0.132866	0.213928	0.356179	1.29474	53
HALLMARK_TNFA_SIGNALING_VIA_NFKB	3.93353e-14	2.80966e-13	0.965328	0.520906	2.32058	194
HALLMARK_UNFOLDED_PROTEIN_RESPONSE	1.91465e-13	1.19666e-12	0.943632	-0.6058	-2.51876	114
HALLMARK_UV_RESPONSE_DN	0.0207174	0.0431612	0.352488	0.312565	1.33991	144
HALLMARK_UV_RESPONSE_UP	0.0353259	0.0609066	0.321776	-0.29907	-1.3034	159
HALLMARK_WNT_BETA_CATENIN_SIGNALING	0.0647619	0.0981241	0.245042	-0.391598	-1.3649	40
HALLMARK_XENOBIOTIC_METABOLISM	0.0480769	0.0775434	0.287857	-0.285936	-1.25401	174
